# Supplementary material
Source: PubMed Central journal article supplement (PMC3567750)
Supplement: 0eeeaa70af55864e644efa5d3e4a5010_genetics.112.146647-1.pdf [file 0eeeaa70af55864e644efa5d3e4a5010_genetics.112.146647-1.pdf]

**Table S9 Yan reporters contain ETS and MAD motifs.** Reporter constructs were generated by inserting putative Yan binding sequences upstream of the luciferase gene coding sequence. Motif analysis was performed using MAST {Bailey, 1998 #24} with a PWM derived from the top 50 Yan-bound sequences and a PWM for Mad from dmmpmm2009 {Kulakovskiy, 2009 #110}.

| Sequence              | Gene           | Classification<br>of Yan binding<br>at Stage 11 | Length | Number<br>of ETS<br>motifs | Number<br>of ETS<br>motifs<br><55bp<br>apart | Number<br>of MAD<br>motifs | Number of<br>ETS and<br>MAD<br>motifs<br><55bp<br>apart |
|-----------------------|----------------|-------------------------------------------------|--------|----------------------------|----------------------------------------------|----------------------------|---------------------------------------------------------|
| 2R:2462316..2463216   | jing           | Dense                                           | 900    | 7                          | 1                                            | 2                          | 6                                                       |
| 3R:19123736..19124725 | pnt            | Dense                                           | 989    | 4                          | 0                                            | 1                          | 2                                                       |
| 3R:4850556..4851466   | neur           | Dense                                           | 910    | 9                          | 5                                            | 3                          | 5                                                       |
| 3L:7149337..7149875   | corn           | Isolated<br>multiple                            | 538    | 4                          | 1                                            | 0                          | 0                                                       |
| 2R:18690149..18691120 | cycB           | Dense                                           | 971    | 3                          | 1                                            | 0                          | 0                                                       |
| X:4002722..4003475    | cib            | Dense                                           | 753    | 5                          | 3                                            | 2                          | 7                                                       |
| 3R:17960179..17960869 | CG42390        | Dense                                           | 690    | 3                          | 0                                            | 0                          | 0                                                       |
| X:2359633..2360418    | trol           | Dense                                           | 785    | 2                          | 0                                            | 2                          | 4                                                       |
| 2R:16988945..16989568 | king-<br>tubby | Isolated single                                 | 623    | 5                          | 2                                            | 1                          | 0                                                       |
| 2L:19575684..19576619 | spi            | Dense                                           | 935    | 4                          | 0                                            | 3                          | 3                                                       |
| 2L:7512763..7513429   | Rapgap1        | Dense                                           | 666    | 7                          | 2                                            | 2                          | 6                                                       |

---

|                       |         |                 |     |   |   |   |   |
|-----------------------|---------|-----------------|-----|---|---|---|---|
| X:11787899..11788506  | wisp    | Isolated single | 607 | 1 | 0 | 0 | 0 |
| 2R:17251401..17252175 | cv-2    | Dense           | 774 | 4 | 1 | 1 | 0 |
| 3L:347377..348056     | mth     | Isolated single | 679 | 8 | 4 | 0 | 0 |
| 3R:7712976..7713933   | CG31368 | Isolated single | 957 | 4 | 0 | 2 | 2 |
| 2L:1007518..1007989   | ia2     | Isolated single | 471 | 2 | 1 | 1 | 2 |
| 3R:22706985..22707726 | ro      | Dense           | 741 | 1 | 0 | 4 | 2 |
| 2L:6956590..6957184   | CG3430  | Isolated single | 594 | 2 | 0 | 2 | 2 |

---
