# Supplementary material
Source: PubMed Central journal article supplement (PMC3567750)
Supplement: 2c7dec222faabbaea99665e1f24e4f4d_genetics.112.146647-2.pdf [file 2c7dec222faabbaea99665e1f24e4f4d_genetics.112.146647-2.pdf]

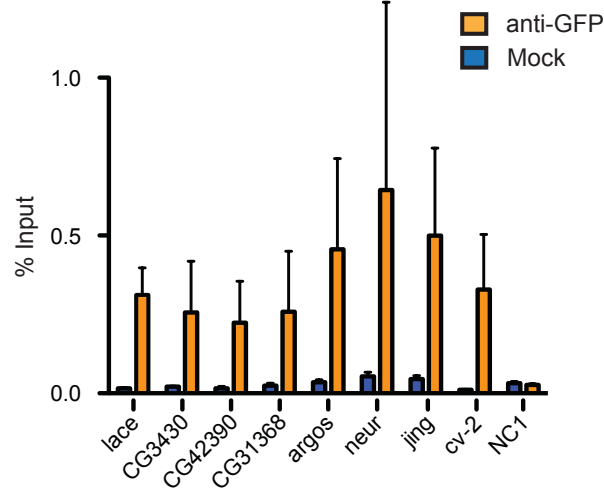

**Figure S3** ChIP patterns following immunoprecipitation of GFP-tagged Yan<sup>WT</sup> with a GFP antibody. Following cross-linking in 1.8% formaldehyde, embryos were washed and homogenized in ChIP lysis buffer as described in Materials & Methods. Following sonication and clarification, the lysate was divided into 1% Input, Mock and IP and either mock treated with no antibody (Mock) or incubated with 1:200 anti-GFP overnight (anti-GFP). Beads were added to each sample and incubated for 4 hours with rocking at 4C. The IPs were then washed and DNA eluted in TE/SDS. Following reverse cross-linking and elution of DNA, samples were analyzed by qPCR at the *lace*, *CG3430*, *CG42390*, *CG31368*, *argos*, *neur*, *jing*, *cv-2* loci as well as at a region where Yan does not bind (NC1).
