# Supplementary material
Source: PubMed Central journal article supplement (PMC3567750)
Supplement: 5b1d86126f7b1fa374dd2c08abca9bcd_genetics.112.146647-13.pdf [file 5b1d86126f7b1fa374dd2c08abca9bcd_genetics.112.146647-13.pdf]

**Table S8 DREME analysis of Yan bound regions.** Motifs identified by DREME analysis are indicated along with the p-value, e-value and number of sites they were found at. TomTom was used to match enriched motifs to the PWM databases: FlyReg (based on Flyreg Drosophila DNase I Footprint Database v2.0); idmmpmm2009 and dmmpmm2009 {Kulakovskii, 2009 #106;Kulakovskiy, 2009 #110}.

| <b>Top 600 peaks associated with HDRs</b> |                  |                |                |              |
|-------------------------------------------|------------------|----------------|----------------|--------------|
| <b>DREME motif</b>                        | <b>TomTom ID</b> | <b>p-value</b> | <b>E-value</b> | <b>sites</b> |
| GARAGRGA                                  | Trl              | 9.64E-05       | 0.00722792     | 173          |
| DACAACAA                                  | Aef1             | 0.000418125    | 0.0313594      | 164          |
| CTCKCTY                                   | Trl              | 3.72E-05       | 0.00279222     | 229          |
| KGGAAAW                                   | dl               | 0.0012355      | 0.0926621      | 333          |
| CAGGTAG                                   | sna              | 0.000531537    | 0.0398653      | 65           |
| CGRCAGC                                   | Adf1             | 0.000816332    | 0.0612249      | 92           |
| CACTCGM                                   | z                | 0.000766762    | 0.0575072      | 97           |
| CACTCGM                                   | tin              | 0.00120053     | 0.0900398      | 97           |
| TTAATTR                                   | Dfd              | 3.91E-05       | 0.00293183     | 131          |
| TTAATTR                                   | en               | 0.000104947    | 0.007871       | 131          |
| TTAATTR                                   | ara              | 0.000701701    | 0.0526276      | 131          |
| CASTTGAG                                  | tin              | 5.07E-06       | 0.000380059    | 44           |
| CASTTGAG                                  | vnd              | 1.33E-05       | 0.000995676    | 44           |
| <b>TOP 600 Isolated peaks</b>             |                  |                |                |              |
| <b>DREME motif</b>                        | <b>TomTom ID</b> | <b>p-value</b> | <b>E-value</b> | <b>sites</b> |
| CBCTCTCY                                  | Trl              | 1.29E-05       | 0.000965534    | 159          |
| CARCARCA                                  | Aef1             | 1.61E-05       | 0.00120872     | 185          |
| AAHAAYAA                                  | bab1             | 0.000985128    | 0.0738846      | 243          |
| CACTCRCW                                  | z                | 4.80E-05       | 0.00360071     | 112          |
| CACTCRCW                                  | ey               | 0.000539699    | 0.0404774      | 112          |
| CACTCRCW                                  | toy              | 0.00106265     | 0.0796985      | 112          |
| AHATAAA                                   | zen              | 0.000889086    | 0.0666815      | 193          |
| GGCDGCCA                                  | shn              | 0.000443008    | 0.0332256      | 38           |
