# Supplementary material
Source: PubMed Central journal article supplement (PMC3567750)
Supplement: 8d8a9374b718d3267a59abf21f69d7e3_genetics.112.146647-12.pdf [file 8d8a9374b718d3267a59abf21f69d7e3_genetics.112.146647-12.pdf]

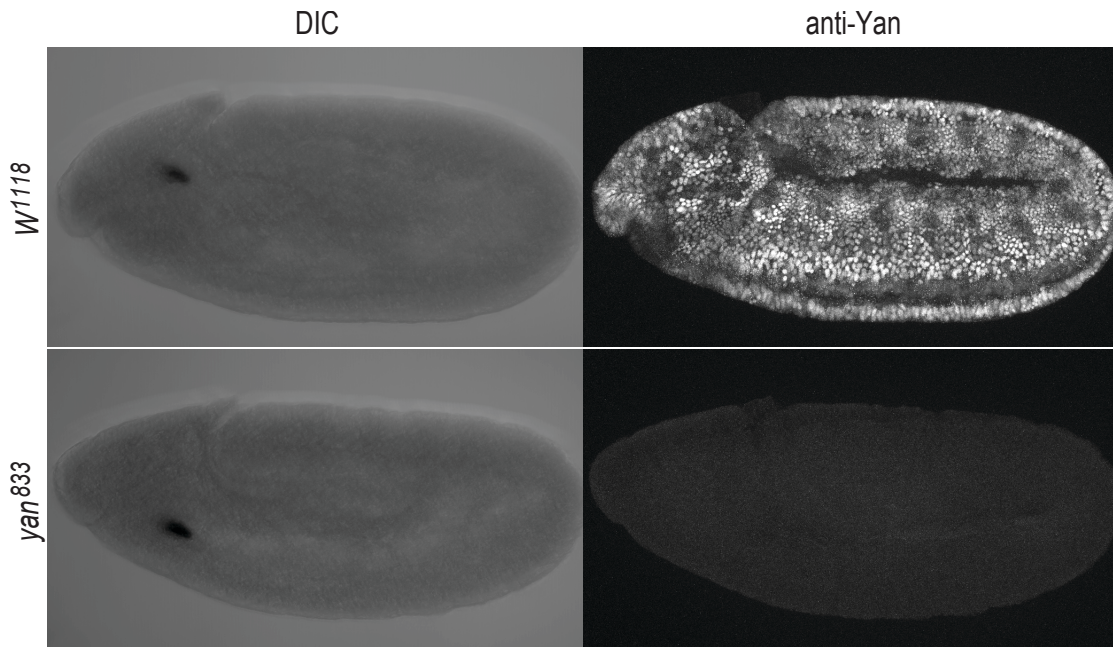

**Figure S2** Specificity of Yan antibody. Embryos were fixed at room temperature for 20 minutes in a 1:1 mixture of n-heptane and 4% formaldehyde solution in PBS with vigorous shaking. The vitelline membrane was removed by replacing the formaldehyde solution with methanol. Embryos were blocked in PNT (PBS, 1% normal goat serum, 0.1% TX100) and stained with guinea pig anti-Yan (1:2000), followed by secondary antibody staining with cy3-conjugated anti-guinea pig antibody (1:2000).
