# Supplementary material
Source: PubMed Central journal article supplement (PMC3567750)
Supplement: 9a6b571883af2c182c053d1d82c4b623_genetics.112.146647-17.pdf [file 9a6b571883af2c182c053d1d82c4b623_genetics.112.146647-17.pdf]

**Table S6 PANTHER analysis of Yan datasets.** PANTHER (Thomas et al., 2003) was used to perform pathway analysis of genes assigned to Yan-bound regions at stage 5-7 and stage 11 and of genes assigned to Yan-bound regions in the *D. virilis* datasets. Only Bonferroni-corrected p-values of <0.005 were considered significant.

| Pathway                                                                        | Stage 5-7 |          |            |          | Stage 11 |          |            |          | D. virilis |          |            |          |
|--------------------------------------------------------------------------------|-----------|----------|------------|----------|----------|----------|------------|----------|------------|----------|------------|----------|
|                                                                                | Counts    | Expected | Over/Under | p-value  | Counts   | Expected | Over/Under | p-value  | Counts     | Expected | Over/Under | p-value  |
| Notch signaling pathway                                                        | 13        | 2.53     | +          | 2.56E-06 | 13       | 2.53     | +          | 2.64E-06 | 11         | 2.18     | +          | 1.79E-05 |
| Wnt signaling pathway                                                          | 27        | 13.43    | +          | 6.83E-04 | 36       | 13.47    | +          | 2.25E-07 | 20         | 11.26    | +          | 1.14E-02 |
| Ras Pathway                                                                    | 10        | 3.23     | +          | 1.86E-03 | 7        | 3.24     | +          | 4.70E-02 | 6          | 2.45     | +          | 3.83E-02 |
| Insulin/IGF pathway-mitogen activated protein kinase kinase/MAP kinase cascade | 9         | 3.54     | +          | 1.04E-02 | 8        | 3.55     | +          | 2.84E-02 | 6          | 1.22     | +          | 1.63E-03 |
| p53 pathway                                                                    | 11        | 4.04     | +          | 3.01E-03 | 7        | 4.05     | +          | 1.16E-01 | 7          | 3.75     | +          | 8.64E-02 |
| TGF-beta signaling pathway                                                     | 12        | 5.86     | +          | 1.69E-02 | 16       | 5.88     | +          | 3.94E-04 | 10         | 4.8      | +          | 2.50E-02 |
| PDGF signaling pathway                                                         | 10        | 5.66     | +          | 6.19E-02 | 11       | 5.67     | +          | 3.03E-02 | 12         | 4.89     | +          | 4.51E-03 |
| Interleukin signaling pathway                                                  | 8         | 3.84     | +          | 4.19E-02 | 10       | 3.85     | +          | 6.24E-03 | 8          | 2.97     | +          | 1.11E-02 |
| Cadherin signaling pathway                                                     | 11        | 5.45     | +          | 2.37E-02 | 15       | 5.47     | +          | 5.50E-04 | 10         | 4.45     | +          | 1.59E-02 |
| Angiogenesis                                                                   | 11        | 6.26     | +          | 5.40E-02 | 15       | 6.28     | +          | 2.10E-03 | 9          | 5.06     | +          | 7.20E-02 |
| Glutamine glutamate conversion                                                 | 2         | 0.4      | +          | 6.26E-02 | 3        | 0.41     | +          | 8.20E-03 | 0          | 0.35     | -          | 7.05E-01 |
| Alzheimer disease-presenilin pathway                                           | 7         | 3.94     | +          | 1.04E-01 | 12       | 3.95     | +          | 8.07E-04 | 3          | 2.71     | +          | 5.08E-01 |
