# Supplementary material
Source: PubMed Central journal article supplement (PMC3567750)
Supplement: 34ced999b6ca42728482b7004c0bd962_genetics.112.146647-10.pdf [file 34ced999b6ca42728482b7004c0bd962_genetics.112.146647-10.pdf]

**Table S10 List of primers used for CHIP qPCR**

| Gene    | Forward                   | Reverse                    |
|---------|---------------------------|----------------------------|
| lace    | 5'GAAACGCGAGTTAAACACTT3'  | 5'ATGGAACCAGCTATGGAAC3'    |
| CG3430  | 5'CCAGGTCCAGGTACTTTATG3'  | 5'GGAATCATCTGAAGAGCAAG3'   |
| CG5740  | 5'TGTTGTTGTTCGGTGATTTAG3' | 5'AGAGGGAAATAAGAGGGAGA3'   |
| cv-2    | 5'TTCTTCTTCTTCCTCCTCCT3'  | 5'GGAAGTGTGTGTGTGTGTGT3'   |
| CG31368 | 5'TAGTGCAGCTGAAATCAAGA3'  | 5'TACAAACTCACGCAAACATT3'   |
| eve     | 5'GCAGCAGCATTGTATCTC3'    | 5'GTGAAGCAGCAATTATGTTG3'   |
| argos   | 5'TGAATACGCTGCAGTTTAAG3'  | 5'AACTGACGGAGGAAGTAAATAA3' |
| neur    | 5'CCATTCTAAAGGAAACATCG3'  | 5'TTTCTACTCCACCTTGGTTC3'   |
| jing    | 5'ACTGGGAAATTCATAAGCA3'   | 5'CGTACTCACACTTGCACAAT3'   |
| NC1     | 5'GCATTTATTAAGCCAACAC3'   | 5'GTTAAGCTTAGGTCGTGCTC3'   |
| NC2     | 5'TTCAGCGCACTGTTTAAGTA3'  | 5'CGGTCTCTTTCTGACAGTCT3'   |
