# Supplementary material
Source: PubMed Central journal article supplement (PMC3567750)
Supplement: 629e5ec9d167e7c81efaffc9a4607761_genetics.112.146647-15.pdf [file 629e5ec9d167e7c81efaffc9a4607761_genetics.112.146647-15.pdf]

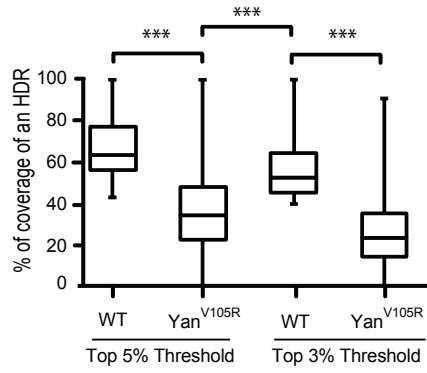

**Figure S7** Quantification of Yan<sup>V105R</sup> coverage of wild-type Yan high-density regions. Quantification of the density of HDRs bound by either Yan<sup>V105R</sup> or wild-type Yan (WT) using a threshold of top 3% or 5% of p-values for peak calling (Yan<sup>WT</sup>-5%:Yan<sup>V105R</sup>-5%,  $p < 0.0001$ ; Yan<sup>WT</sup>-3%:Yan<sup>V105R</sup>-5%,  $p < 0.0001$ ; Yan<sup>WT</sup>-3%:Yan<sup>V105R</sup>-3%,  $p < 0.0001$ ; Friedman test).
