# Supplementary material
Source: PubMed Central journal article supplement (PMC3567750)
Supplement: 181097dbf4fba1c9b35fa25d965d9e5c_genetics.112.146647-14.pdf [file 181097dbf4fba1c9b35fa25d965d9e5c_genetics.112.146647-14.pdf]

**Table S1 Summary of Yan datasets**

| A. SUMMARY                  |           |          |          |           |          |                      |          |           |          |          |  |
|-----------------------------|-----------|----------|----------|-----------|----------|----------------------|----------|-----------|----------|----------|--|
|                             | YAN       |          | YAN      | YAN       |          | YAN <sup>V105R</sup> |          | 6X YAN    |          | D.VIR    |  |
| STAGE                       | st 11     |          | st 11    | st 5-7    |          | st 11                |          | st 11     |          | st 11    |  |
| METHOD                      | ChIP-chip |          | ChIP-seq | ChIP-chip |          | ChIP-chip            |          | ChIP-chip |          | ChIP-seq |  |
| CORRELATION <sup>a</sup>    | 0.98      |          | 0.83     | 0.93      |          | 0.97                 |          | 0.97      |          | 0.93     |  |
| PROGRAM                     | TAS       | MAT      | MACS     | TAS       | MAT      | TAS                  | MAT      | TAS       | MAT      | MACS     |  |
| THRESHOLD <sup>b</sup>      | 20.5      | 2.4      | 50       | 9.9       | 1.1      | 9.7                  | 1.4      | 9.8       | 1.6      | 100      |  |
| # PEAKS                     | 3638      | 3716     | 3311     | 3114      | 3498     | 3009                 | 3531     | 3487      | 3616     | 1170     |  |
| % PEAKS IN HDR <sup>c</sup> | 41.26     | 42.92    | 39.07    | 21.61     | 25.96    | 20.14                | 26.85    | 42.76     | 43.9     | 43.85    |  |
| % IN HDR <sup>d</sup>       | 51.41     | 52.73    | 45.35    | 31.24     | 34.84    | 28.23                | 34.89    | 53.05     | 53.4     | 59.85    |  |
| MEDIAN HDR (bp)             | 4111      | 4111     | 3932     | 3216      | 3382     | 3263                 | 3513     | 3903      | 4074     | 3267     |  |
| B. OVERLAP <sup>e</sup>     |           |          |          |           |          |                      |          |           |          |          |  |
|                             | ST11      |          | ST11     | ST5-7     |          | V105R                |          | 6X        |          | D.VIR    |  |
|                             | TAS       | MAT      | MACS     | TAS       | MAT      | TAS                  | MAT      | TAS       | MAT      | MACS     |  |
| ST11 TAS                    | -         | 81.13*** | 52.77*** | 55.06*    | 53.70*** | 61.64***             | 59.21*** | 80.15***  | 77.12    | 41.65    |  |
| ST11 MAT                    | 81.11***  | -        | 52.53*** | 51.75     | 57.56*** | 59.01***             | 63.63*** | 77.80***  | 84.67*** | 41.82    |  |
| ST11 MACS                   | 48.61***  | 48.42*** | -        | 37.13     | 38.63    | 46.44                | 45.38    | 51.55***  | 50.46*** | 15.04    |  |
| ST5-7 TAS                   | 45.67*    | 43.85    | 33.73    | -         | 62.34*** | 43.85                | 39.94    | 52.59     | 50.59    | 13.08    |  |
| ST5-7 MAT                   | 49.30***  | 52.73*** | 38.76    | 69.71***  | -        | 47.87                | 50.91*   | 52.24***  | 56.31*** | 14.13    |  |
| V105R TAS                   | 49.27***  | 48.26*** | 41.10    | 42.37     | 41.86    | -                    | 59.12*** | 52.32***  | 51.00*** | 36.83    |  |
| V105R MAT                   | 54.50***  | 58.47*** | 46.04    | 44.23     | 51.16*   | 68.52***             | -        | 57.92***  | 61.11*** | 40.19    |  |
| 6XYAN TAS                   | 77.59***  | 75.61*** | 54.39*** | 45.50     | 49.80*** | 63.16***             | 60.80*** | -         | 82.63*** | 42.08    |  |
| 6XYAN MAT                   | 74.87***  | 82.58*** | 53.32*** | 43.93     | 52.92*** | 60.74***             | 64.87*** | 83.33***  | -        | 41.65    |  |
| D.VIR MACS                  | 15.32     | 15.32    | 38.5     | 31.24     | 35.71    | 16.26                | 15.67    | 16.01     | 16.32    | -        |  |

<sup>a</sup> Average pairwise correlation of probe intensities of 3 replicates (chip); correlation of tag counts in 2 replicates (seq)

<sup>b</sup>  $-\log_{10}$  p value (TAS, MACS); MAT score (MAT)

<sup>c</sup> High density regions (HDR) identified at 40% occupancy

<sup>d</sup> Total base-pair (bp) length in peaks within HDRs divided by total bp length of all peaks

<sup>e</sup> % peaks in column which intersect with peaks in row. Co-occurrence with  $p < 0.05$  (\*) and  $p < 0.001$  (\*\*\*)
