# Supplementary material
Source: PubMed Central journal article supplement (PMC3567750)
Supplement: 0343496da834a81cb86216e5c680f749_genetics.112.146647-8.pdf [file 0343496da834a81cb86216e5c680f749_genetics.112.146647-8.pdf]

**Table S5 GO analysis of Yan datasets.** DAVID was used to perform GO analysis of Genes assigned to Yan-bound regions at stage 5-7 (A) and stage 11 (B) and of genes assigned to Yan-bound regions in the *D. virilis* datasets (C) {Huang, 2009 #62;Huang, 2009 #63}. Only clusters that contain a GO-term with a p-value <0.0001 (Bonferroni-corrected) are shown.

| <b>A. Stg5-7 Top 2000 genes +/- 3kb from Yan bound region</b> |                                                            |                 |            |
|---------------------------------------------------------------|------------------------------------------------------------|-----------------|------------|
| Cluster 1                                                     |                                                            |                 |            |
| Category                                                      | Term                                                       | Fold Enrichment | Bonferroni |
| SP_PIR_KEYWORDS                                               | dna-binding                                                | 3.078305244     | 5.24E-43   |
| GOTERM_MF_FAT                                                 | GO:0030528~transcription regulator activity                | 2.370622284     | 1.05E-39   |
| GOTERM_BP_FAT                                                 | GO:0045449~regulation of transcription                     | 2.189821722     | 3.88E-35   |
| GOTERM_MF_FAT                                                 | GO:0003700~transcription factor activity                   | 2.806327586     | 3.38E-35   |
| GOTERM_BP_FAT                                                 | GO:0051252~regulation of RNA metabolic process             | 2.258051786     | 3.74E-32   |
| GOTERM_BP_FAT                                                 | GO:0006355~regulation of transcription, DNA-dependent      | 2.317119826     | 3.98E-31   |
| GOTERM_MF_FAT                                                 | GO:0003677~DNA binding                                     | 2.039477281     | 1.62E-29   |
| SP_PIR_KEYWORDS                                               | transcription regulation                                   | 2.67305822      | 1.38E-26   |
| SP_PIR_KEYWORDS                                               | nucleus                                                    | 2.033269269     | 2.54E-26   |
| SP_PIR_KEYWORDS                                               | Transcription                                              | 2.516967229     | 1.62E-22   |
| GOTERM_MF_FAT                                                 | GO:0043565~sequence-specific DNA binding                   | 2.823780256     | 7.62E-20   |
| GOTERM_BP_FAT                                                 | GO:0006350~transcription                                   | 2.13651513      | 1.56E-16   |
| GOTERM_MF_FAT                                                 | GO:0003702~RNA polymerase II transcription factor activity | 2.500234278     | 2.18E-15   |
| Cluster 2                                                     |                                                            |                 |            |
| Category                                                      | Term                                                       | Fold Enrichment | Bonferroni |
| GOTERM_BP_FAT                                                 | GO:0007444~imaginal disc development                       | 2.50011219      | 3.11E-25   |
| GOTERM_BP_FAT                                                 | GO:0048569~post-embryonic organ development                | 2.779286195     | 4.18E-24   |
| GOTERM_BP_FAT                                                 | GO:0009791~post-embryonic development                      | 2.389634409     | 4.34E-23   |
| GOTERM_BP_FAT                                                 | GO:0007552~metamorphosis                                   | 2.51411418      | 4.13E-22   |
| GOTERM_BP_FAT                                                 | GO:0009886~post-embryonic morphogenesis                    | 2.478282657     | 1.76E-20   |
| GOTERM_BP_FAT                                                 | GO:0048707~instar larval or pupal morphogenesis            | 2.480471342     | 3.91E-20   |
| GOTERM_BP_FAT                                                 | GO:0007560~imaginal disc morphogenesis                     | 2.658087637     | 6.17E-20   |
| GOTERM_BP_FAT                                                 | GO:0048563~post-embryonic organ morphogenesis              | 2.658087637     | 6.17E-20   |
| GOTERM_BP_FAT                                                 | GO:0002165~instar larval or pupal development              | 2.312321106     | 9.87E-20   |
| GOTERM_BP_FAT                                                 | GO:0035107~appendage morphogenesis                         | 2.623801653     | 7.57E-16   |
| GOTERM_BP_FAT                                                 | GO:0035114~imaginal disc-derived appendage morphogenesis   | 2.627217108     | 1.11E-15   |
| GOTERM_BP_FAT                                                 | GO:0048736~appendage development                           | 2.581138211     | 2.60E-15   |

|               |                                                        |             |          |
|---------------|--------------------------------------------------------|-------------|----------|
| GOTERM_BP_FAT | GO:0048737~imaginal disc-derived appendage development | 2.583970736 | 3.81E-15 |
| GOTERM_BP_FAT | GO:0035220~wing disc development                       | 2.385179913 | 1.04E-13 |
| GOTERM_BP_FAT | GO:0035120~post-embryonic appendage morphogenesis      | 2.557092673 | 1.27E-13 |
| GOTERM_BP_FAT | GO:0007476~imaginal disc-derived wing morphogenesis    | 2.45958002  | 4.60E-11 |
| GOTERM_BP_FAT | GO:0007472~wing disc morphogenesis                     | 2.437220202 | 8.01E-11 |

#### Cluster 3

| Category      | Term                                                             | Fold Enrichment | Bonferroni |
|---------------|------------------------------------------------------------------|-----------------|------------|
| GOTERM_BP_FAT | GO:0030182~neuron differentiation                                | 2.535700081     | 3.46E-26   |
| GOTERM_BP_FAT | GO:0000902~cell morphogenesis                                    | 2.346383107     | 3.62E-22   |
| GOTERM_BP_FAT | GO:0048666~neuron development                                    | 2.521134806     | 3.07E-21   |
| GOTERM_BP_FAT | GO:0006928~cell motion                                           | 2.567597814     | 2.17E-19   |
| GOTERM_BP_FAT | GO:0032989~cellular component morphogenesis                      | 2.124705277     | 1.01E-18   |
| GOTERM_BP_FAT | GO:0030030~cell projection organization                          | 2.377475799     | 1.62E-18   |
| GOTERM_BP_FAT | GO:0048667~cell morphogenesis involved in neuron differentiation | 2.547679012     | 1.13E-17   |
| GOTERM_BP_FAT | GO:0048812~neuron projection morphogenesis                       | 2.540826729     | 2.25E-17   |
| GOTERM_BP_FAT | GO:0031175~neuron projection development                         | 2.531973674     | 3.02E-17   |
| GOTERM_BP_FAT | GO:0000904~cell morphogenesis involved in differentiation        | 2.468124679     | 6.98E-17   |
| GOTERM_BP_FAT | GO:0048858~cell projection morphogenesis                         | 2.403147222     | 1.92E-16   |
| GOTERM_BP_FAT | GO:0032990~cell part morphogenesis                               | 2.344598859     | 1.05E-15   |
| GOTERM_BP_FAT | GO:0007409~axonogenesis                                          | 2.779286195     | 5.04E-15   |
| GOTERM_BP_FAT | GO:0007411~axon guidance                                         | 3.11254902      | 1.33E-13   |

#### Cluster 4

| Category        | Term                                     | Fold Enrichment | Bonferroni |
|-----------------|------------------------------------------|-----------------|------------|
| GOTERM_MF_FAT   | GO:0043565~sequence-specific DNA binding | 2.823780256     | 7.62E-20   |
| SP_PIR_KEYWORDS | Homeobox                                 | 3.920660491     | 6.63E-18   |
| INTERPRO        | IPR017970:Homeobox, conserved site       | 3.893088965     | 1.32E-16   |
| INTERPRO        | IPR001356:Homeobox                       | 3.773448411     | 3.45E-16   |
| INTERPRO        | IPR012287:Homeodomain-related            | 3.562543676     | 1.86E-14   |
| SMART           | SM00389:HOX                              | 3.009109526     | 9.59E-13   |
| UP_SEQ_FEATURE  | DNA-binding region:Homeobox              | 3.67965368      | 2.06E-10   |

#### Cluster 5

| Category      | Term              | Fold Enrichment | Bonferroni |
|---------------|-------------------|-----------------|------------|
| GOTERM_BP_FAT | GO:0048729~tissue | 2.856320288     | 3.54E-21   |

|               |                                 |                 |            |
|---------------|---------------------------------|-----------------|------------|
|               | morphogenesis                   |                 |            |
|               | GO:0048598~embryonic            |                 |            |
| GOTERM_BP_FAT | morphogenesis                   | 2.934426745     | 1.01E-20   |
|               | GO:0002009~morphogenesis of     |                 |            |
| GOTERM_BP_FAT | an epithelium                   | 2.727976296     | 1.77E-16   |
|               | GO:0060429~epithelium           |                 |            |
| GOTERM_BP_FAT | development                     | 2.671935697     | 3.11E-16   |
|               | GO:0016331~morphogenesis of     |                 |            |
| GOTERM_BP_FAT | embryonic epithelium            | 2.93962963      | 1.26E-09   |
| GOTERM_BP_FAT | GO:0007391~dorsal closure       | 3.044837427     | 5.70E-08   |
|               | GO:0001700~embryonic            |                 |            |
| GOTERM_BP_FAT | development via the syncytial   |                 |            |
|               | blastoderm                      | 2.175875389     | 1.29E-06   |
|               | GO:0009792~embryonic            |                 |            |
| GOTERM_BP_FAT | development ending in birth or  |                 |            |
|               | egg hatching                    | 2.110234127     | 3.88E-06   |
| Cluster 6     |                                 |                 |            |
| Category      | Term                            | Fold Enrichment | Bonferroni |
|               | GO:0048732~gland                |                 |            |
| GOTERM_BP_FAT | development                     | 2.943236537     | 2.99E-14   |
|               | GO:0007431~salivary gland       |                 |            |
| GOTERM_BP_FAT | development                     | 2.943859313     | 1.20E-11   |
|               | GO:0035272~exocrine system      |                 |            |
| GOTERM_BP_FAT | development                     | 2.943859313     | 1.20E-11   |
|               | GO:0007435~salivary gland       |                 |            |
| GOTERM_BP_FAT | morphogenesis                   | 2.475477583     | 1.18E-04   |
|               | GO:0022612~gland                |                 |            |
| GOTERM_BP_FAT | morphogenesis                   | 2.475477583     | 1.18E-04   |
| Cluster 7     |                                 |                 |            |
| Category      | Term                            | Fold Enrichment | Bonferroni |
|               | GO:0007423~sensory organ        |                 |            |
| GOTERM_BP_FAT | development                     | 2.305816802     | 4.26E-19   |
| GOTERM_BP_FAT | GO:0001654~eye development      | 2.188784471     | 4.86E-12   |
|               | GO:0048749~compound eye         |                 |            |
| GOTERM_BP_FAT | development                     | 2.130277056     | 7.99E-10   |
|               | GO:0046530~photoreceptor        |                 |            |
| GOTERM_BP_FAT | cell differentiation            | 2.755902778     | 2.19E-08   |
|               | GO:0001751~compound eye         |                 |            |
| GOTERM_BP_FAT | photoreceptor cell              |                 |            |
|               | differentiation                 | 2.733061061     | 1.05E-06   |
|               | GO:0001754~eye                  |                 |            |
| GOTERM_BP_FAT | photoreceptor cell              |                 |            |
|               | differentiation                 | 2.676076628     | 1.39E-06   |
|               | GO:0048592~eye                  |                 |            |
| GOTERM_BP_FAT | morphogenesis                   | 2.019492772     | 1.86E-06   |
|               | GO:0001745~compound eye         |                 |            |
| GOTERM_BP_FAT | morphogenesis                   | 1.947210667     | 8.06E-05   |
| Cluster 8     |                                 |                 |            |
| Category      | Term                            | Fold Enrichment | Bonferroni |
| GOTERM_BP_FAT | GO:0006928~cell motion          | 2.567597814     | 2.17E-19   |
| GOTERM_BP_FAT | GO:0016477~cell migration       | 2.53984         | 2.10E-09   |
| GOTERM_BP_FAT | GO:0048870~cell motility        | 2.376855615     | 5.67E-08   |
| GOTERM_BP_FAT | GO:0051674~localization of cell | 2.303709751     | 1.74E-07   |
| Cluster 9     |                                 |                 |            |

| Category      | Term                                                                        | Fold Enrichment | Bonferroni |
|---------------|-----------------------------------------------------------------------------|-----------------|------------|
| GOTERM_BP_FAT | GO:0007155~cell adhesion                                                    | 2.635530013     | 1.19E-10   |
| GOTERM_BP_FAT | GO:0022610~biological adhesion                                              | 2.439267139     | 7.06E-09   |
| GOTERM_BP_FAT | GO:0016337~cell-cell adhesion                                               | 3.228610169     | 5.98E-05   |
| Cluster 10    |                                                                             |                 |            |
| Category      | Term                                                                        | Fold Enrichment | Bonferroni |
| GOTERM_BP_FAT | GO:0048645~organ formation                                                  | 5.291333333     | 2.86E-13   |
| GOTERM_BP_FAT | GO:0010160~formation of organ boundary                                      | 5.198502924     | 5.72E-12   |
| GOTERM_BP_FAT | GO:0048859~formation of anatomical boundary                                 | 4.81030303      | 1.20E-11   |
| GOTERM_BP_FAT | GO:0008052~sensory organ boundary specification                             | 4.907903382     | 7.00E-05   |
| GOTERM_BP_FAT | GO:0007432~salivary gland boundary specification                            | 5.644088889     | 8.93E-04   |
| Cluster 11    |                                                                             |                 |            |
| Category      | Term                                                                        | Fold Enrichment | Bonferroni |
| GOTERM_BP_FAT | GO:0007169~transmembrane receptor protein tyrosine kinase signaling pathway | 3.04211213      | 1.59E-09   |
| GOTERM_BP_FAT | GO:0007167~enzyme linked receptor protein signaling pathway                 | 2.724732567     | 1.76E-09   |
| GOTERM_BP_FAT | GO:0007173~epidermal growth factor receptor signaling pathway               | 3.919506173     | 1.29E-04   |
| Cluster 12    |                                                                             |                 |            |
| Category      | Term                                                                        | Fold Enrichment | Bonferroni |
| GOTERM_BP_FAT | GO:0007389~pattern specification process                                    | 2.410496296     | 9.73E-27   |
| GOTERM_BP_FAT | GO:0003002~regionalization                                                  | 2.424223201     | 1.56E-25   |
| GOTERM_BP_FAT | GO:0009880~embryonic pattern specification                                  | 2.412786917     | 4.35E-11   |
| GOTERM_BP_FAT | GO:0035282~segmentation                                                     | 2.306478632     | 7.21E-11   |
| GOTERM_BP_FAT | GO:0007350~blastoderm segmentation                                          | 2.427217125     | 1.54E-10   |
| GOTERM_BP_FAT | GO:0007354~zygotic determination of anterior/posterior axis, embryo         | 4.379034483     | 8.19E-05   |
| Cluster 13    |                                                                             |                 |            |
| Category      | Term                                                                        | Fold Enrichment | Bonferroni |
| GOTERM_BP_FAT | GO:0014016~neuroblast differentiation                                       | 5.291333333     | 2.33E-08   |
| GOTERM_BP_FAT | GO:0014017~neuroblast fate commitment                                       | 5.22600823      | 1.20E-07   |
| GOTERM_BP_FAT | GO:0007400~neuroblast fate determination                                    | 5.07968         | 3.00E-06   |
| GOTERM_BP_FAT | GO:0007419~ventral cord development                                         | 4.096516129     | 3.16E-04   |
| Cluster 14    |                                                                             |                 |            |
| Category      | Term                                                                        | Fold Enrichment | Bonferroni |
| GOTERM_BP_FAT | GO:0048565~gut development                                                  | 3.962459665     | 8.58E-13   |

|               |                                          |             |          |
|---------------|------------------------------------------|-------------|----------|
| GOTERM_BP_FAT | GO:0035239~tube morphogenesis            | 3.191597884 | 6.47E-08 |
| GOTERM_BP_FAT | GO:0048567~ectodermal gut morphogenesis  | 3.680927536 | 1.95E-05 |
| GOTERM_BP_FAT | GO:0007439~ectodermal gut development    | 3.680927536 | 1.95E-05 |
| GOTERM_BP_FAT | GO:0048547~gut morphogenesis             | 3.602609929 | 3.32E-05 |
| GOTERM_BP_FAT | GO:0055123~digestive system development  | 3.527555556 | 5.53E-05 |
| GOTERM_BP_FAT | GO:0048546~digestive tract morphogenesis | 3.527555556 | 5.53E-05 |
| GOTERM_BP_FAT | GO:0007442~hindgut morphogenesis         | 3.527555556 | 5.28E-04 |

Cluster 15

| Category      | Term                                                                                                    | Fold Enrichment | Bonferroni |
|---------------|---------------------------------------------------------------------------------------------------------|-----------------|------------|
| GOTERM_MF_FAT | GO:0016564~transcription repressor activity                                                             | 3.422930977     | 1.06E-14   |
| GOTERM_BP_FAT | GO:0006357~regulation of transcription from RNA polymerase II promoter                                  | 2.682412037     | 8.58E-13   |
| GOTERM_BP_FAT | GO:0000122~negative regulation of transcription from RNA polymerase II promoter                         | 3.469726776     | 1.00E-06   |
| GOTERM_BP_FAT | GO:0010558~negative regulation of macromolecule biosynthetic process                                    | 1.978872629     | 3.99E-05   |
| GOTERM_BP_FAT | GO:0009890~negative regulation of biosynthetic process                                                  | 1.95503079      | 6.78E-05   |
| GOTERM_BP_FAT | GO:0031327~negative regulation of cellular biosynthetic process                                         | 1.95503079      | 6.78E-05   |
| GOTERM_BP_FAT | GO:0016481~negative regulation of transcription                                                         | 1.976794418     | 6.84E-04   |
| GOTERM_BP_FAT | GO:0051172~negative regulation of nitrogen compound metabolic process                                   | 1.929873443     | 7.99E-04   |
| GOTERM_BP_FAT | GO:0045934~negative regulation of nucleobase, nucleoside, nucleotide and nucleic acid metabolic process | 1.929873443     | 7.99E-04   |

Cluster 16

| Category      | Term                                                 | Fold Enrichment | Bonferroni |
|---------------|------------------------------------------------------|-----------------|------------|
| GOTERM_BP_FAT | GO:0035215~genital disc development                  | 5.795269841     | 7.29E-11   |
| GOTERM_BP_FAT | GO:0035225~determination of genital disc primordium  | 7.055111111     | 5.01E-04   |
| GOTERM_BP_FAT | GO:0007445~determination of imaginal disc primordium | 7.055111111     | 5.01E-04   |

Cluster 17

| Category      | Term                                            | Fold Enrichment | Bonferroni |
|---------------|-------------------------------------------------|-----------------|------------|
| GOTERM_BP_FAT | GO:0045941~positive regulation of transcription | 2.615256705     | 5.11E-06   |
| GOTERM_BP_FAT | GO:0010604~positive                             | 2.434510172     | 5.21E-06   |

|               |                                                                                                                  |                 |            |
|---------------|------------------------------------------------------------------------------------------------------------------|-----------------|------------|
|               | regulation of macromolecule<br>metabolic process<br>GO:0010557~positive                                          |                 |            |
| GOTERM_BP_FAT | regulation of macromolecule<br>biosynthetic process<br>GO:0010628~positive                                       | 2.515776055     | 5.37E-06   |
| GOTERM_BP_FAT | regulation of gene expression<br>GO:0045935~positive                                                             | 2.592904084     | 6.91E-06   |
| GOTERM_BP_FAT | regulation of nucleobase,<br>nucleoside, nucleotide and<br>nucleic acid metabolic process<br>GO:0051173~positive | 2.507188246     | 2.20E-05   |
| GOTERM_BP_FAT | regulation of nitrogen<br>compound metabolic process<br>GO:0009891~positive                                      | 2.507188246     | 2.20E-05   |
| GOTERM_BP_FAT | regulation of biosynthetic<br>process<br>GO:0031328~positive                                                     | 2.259480029     | 8.00E-05   |
| GOTERM_BP_FAT | regulation of cellular<br>biosynthetic process<br>GO:0016563~transcription                                       | 2.259480029     | 8.00E-05   |
| GOTERM_MF_FAT | activator activity                                                                                               | 2.525962206     | 2.81E-04   |
| Cluster 18    |                                                                                                                  |                 |            |
| Category      | Term                                                                                                             | Fold Enrichment | Bonferroni |
| GOTERM_BP_FAT | GO:0035295~tube<br>development                                                                                   | 3.420659933     | 3.43E-12   |
| GOTERM_BP_FAT | GO:0007424~open tracheal<br>system development                                                                   | 2.858933914     | 6.29E-12   |
| GOTERM_BP_FAT | GO:0060541~respiratory<br>system development                                                                     | 2.858933914     | 6.29E-12   |
| GOTERM_BP_FAT | GO:0035239~tube<br>morphogenesis                                                                                 | 3.191597884     | 6.47E-08   |
| Cluster 19    |                                                                                                                  |                 |            |
| Category      | Term                                                                                                             | Fold Enrichment | Bonferroni |
| GOTERM_BP_FAT | GO:0001667~ameboidal cell<br>migration                                                                           | 4.188972222     | 7.80E-05   |
| GOTERM_BP_FAT | GO:0007427~epithelial cell<br>migration, open tracheal<br>system                                                 | 4.135754789     | 6.69E-04   |
| GOTERM_BP_FAT | GO:0010631~epithelial cell<br>migration                                                                          | 4.135754789     | 6.69E-04   |
| Cluster 20    |                                                                                                                  |                 |            |
| Category      | Term                                                                                                             | Fold Enrichment | Bonferroni |
| GOTERM_BP_FAT | GO:0030036~actin<br>cytoskeleton organization                                                                    | 2.269476301     | 1.95E-04   |
| GOTERM_BP_FAT | GO:0030029~actin filament-<br>based process                                                                      | 2.253716049     | 2.46E-04   |
| GOTERM_BP_FAT | GO:0007010~cytoskeleton<br>organization                                                                          | 1.608261888     | 7.66E-04   |
| Cluster 21    |                                                                                                                  |                 |            |
| Category      | Term                                                                                                             | Fold Enrichment | Bonferroni |
| GOTERM_BP_FAT | GO:0051960~regulation of<br>nervous system development                                                           | 3.057214815     | 1.64E-07   |
| GOTERM_BP_FAT | GO:0050767~regulation of                                                                                         | 3.369605307     | 5.89E-07   |

|                |                                                            |                 |            |
|----------------|------------------------------------------------------------|-----------------|------------|
| GOTERM_BP_FAT  | neurogenesis<br>GO:0060284~regulation of cell development  | 2.58507888      | 7.94E-07   |
| GOTERM_BP_FAT  | GO:0045664~regulation of neuron differentiation            | 3.266255144     | 1.70E-04   |
| Cluster 22     |                                                            |                 |            |
| Category       | Term                                                       | Fold Enrichment | Bonferroni |
| GOTERM_BP_FAT  | GO:0035051~cardiac cell differentiation                    | 6.3496          | 6.41E-09   |
| GOTERM_BP_FAT  | GO:0010002~cardioblast differentiation                     | 6.512410256     | 6.72E-05   |
| Cluster 23     |                                                            |                 |            |
| Category       | Term                                                       | Fold Enrichment | Bonferroni |
| GOTERM_BP_FAT  | GO:0007447~imaginal disc pattern formation                 | 3.01312037      | 8.46E-08   |
| Cluster 24     |                                                            |                 |            |
| Category       | Term                                                       | Fold Enrichment | Bonferroni |
| GOTERM_BP_FAT  | GO:0007365~periodic partitioning                           | 3.135604938     | 8.26E-04   |
| Cluster 25     |                                                            |                 |            |
| Category       | Term                                                       | Fold Enrichment | Bonferroni |
| GOTERM_BP_FAT  | GO:0007498~mesoderm development                            | 3.023619048     | 2.44E-07   |
| GOTERM_BP_FAT  | GO:0001704~formation of primary germ layer                 | 4.233066667     | 1.64E-04   |
| GOTERM_BP_FAT  | GO:0048332~mesoderm morphogenesis                          | 4.442106996     | 1.70E-04   |
| GOTERM_BP_FAT  | GO:0001707~mesoderm formation                              | 4.341606838     | 7.25E-04   |
| Cluster 26     |                                                            |                 |            |
| Category       | Term                                                       | Fold Enrichment | Bonferroni |
| UP_SEQ_FEATURE | DNA-binding region:Basic motif                             | 3.431028431     | 2.80E-05   |
| UP_SEQ_FEATURE | domain:Helix-loop-helix motif                              | 3.622159091     | 3.83E-05   |
| INTERPRO       | IPR001092:Basic helix-loop-helix dimerisation region bHLH  | 3.200251099     | 1.04E-04   |
| Cluster 27     |                                                            |                 |            |
| Category       | Term                                                       | Fold Enrichment | Bonferroni |
| GOTERM_BP_FAT  | GO:0046530~photoreceptor cell differentiation              | 2.755902778     | 2.19E-08   |
| GOTERM_BP_FAT  | GO:0001751~compound eye photoreceptor cell differentiation | 2.733061061     | 1.05E-06   |
| GOTERM_BP_FAT  | GO:0001754~eye photoreceptor cell differentiation          | 2.676076628     | 1.39E-06   |
| Cluster 28     |                                                            |                 |            |
| Category       | Term                                                       | Fold Enrichment | Bonferroni |
| GOTERM_BP_FAT  | GO:0010941~regulation of cell death                        | 2.453951691     | 1.55E-04   |
| Cluster 30     |                                                            |                 |            |

| Category        | Term                                                  | Fold Enrichment | Bonferroni  |
|-----------------|-------------------------------------------------------|-----------------|-------------|
| GOTERM_BP_FAT   | GO:0035218~leg disc development                       | 3.735058824     | 1.17E-06    |
| Cluster 31      |                                                       |                 |             |
| Category        | Term                                                  | Fold Enrichment | Bonferroni  |
| GOTERM_BP_FAT   | GO:0042692~muscle cell differentiation                | 2.95551952      | 5.33E-05    |
| Cluster 32      |                                                       |                 |             |
| Category        | Term                                                  | Fold Enrichment | Bonferroni  |
| GOTERM_BP_FAT   | GO:0040007~growth                                     | 2.437220202     | 4.28E-04    |
| Cluster 33      |                                                       |                 |             |
| Category        | Term                                                  | Fold Enrichment | Bonferroni  |
| GOTERM_CC_FAT   | GO:0005938~cell cortex                                | 2.529186992     | 0.004420148 |
| GOTERM_CC_FAT   | GO:0045177~apical part of cell                        | 2.887893801     | 0.012972582 |
| GOTERM_CC_FAT   | GO:0045179~apical cortex                              | 3.979490022     | 0.02123214  |
| GOTERM_CC_FAT   | GO:0044448~cell cortex part                           | 2.854851538     | 0.026635235 |
| Cluster 34      |                                                       |                 |             |
| Category        | Term                                                  | Fold Enrichment | Bonferroni  |
| GOTERM_BP_FAT   | GO:0001703~gastrulation with mouth forming first      | 3.527555556     | 0.005058133 |
| GOTERM_BP_FAT   | GO:0010004~gastrulation involving germ band extension | 3.527555556     | 0.005058133 |
| GOTERM_BP_FAT   | GO:0007370~ventral furrow formation                   | 4.535428571     | 0.423844247 |
| GOTERM_BP_FAT   | GO:0007377~germ-band extension                        | 5.291333333     | 0.99636596  |
| Cluster 35      |                                                       |                 |             |
| Category        | Term                                                  | Fold Enrichment | Bonferroni  |
| INTERPRO        | IPR013088:Zinc finger, NHR/GATA-type                  | 4.4689897       | 3.12E-04    |
| Cluster 36      |                                                       |                 |             |
| Category        | Term                                                  | Fold Enrichment | Bonferroni  |
| SP_PIR_KEYWORDS | zinc finger                                           | 3.405308604     | 4.85E-05    |
| Cluster 37      |                                                       |                 |             |
| Category        | Term                                                  | Fold Enrichment | Bonferroni  |
| GOTERM_BP_FAT   | GO:0007365~periodic partitioning                      | 3.135604938     | 8.26E-04    |
| Cluster 38      |                                                       |                 |             |
| Category        | Term                                                  | Fold Enrichment | Bonferroni  |
| GOTERM_BP_FAT   | GO:0007435~salivary gland morphogenesis               | 2.475477583     | 1.18E-04    |
| GOTERM_BP_FAT   | GO:0022612~gland morphogenesis                        | 2.475477583     | 1.18E-04    |
| Cluster 39      |                                                       |                 |             |
| Category        | Term                                                  | Fold Enrichment | Bonferroni  |
| GOTERM_BP_FAT   | GO:0035218~leg disc development                       | 3.735058824     | 1.17E-06    |
| Cluster 40      |                                                       |                 |             |



| Category        | Term                                   | Fold Enrichment | Bonferroni |
|-----------------|----------------------------------------|-----------------|------------|
| GOTERM_BP_FAT   | GO:0010941~regulation of cell death    | 2.453951691     | 1.55E-04   |
| Cluster 41      |                                        |                 |            |
| Category        | Term                                   | Fold Enrichment | Bonferroni |
| GOTERM_BP_FAT   | GO:0042692~muscle cell differentiation | 2.95551952      | 5.33E-05   |
| Cluster 42      |                                        |                 |            |
| Category        | Term                                   | Fold Enrichment | Bonferroni |
| SP_PIR_KEYWORDS | zinc-finger                            | 1.779511863     | 2.45E-04   |

#### B. Stg11 Top 2000 genes +/- 3kb from Yan bound region

| Cluster1        |                                                            |                 |            |
|-----------------|------------------------------------------------------------|-----------------|------------|
| Category        | Term                                                       | Fold Enrichment | Bonferroni |
| SP_PIR_KEYWORDS | dna-binding                                                | 3.210500953     | 5.65E-47   |
| GOTERM_MF_FAT   | GO:0030528~transcription regulator activity                | 2.408069822     | 3.54E-41   |
| GOTERM_MF_FAT   | GO:0003700~transcription factor activity                   | 2.910388735     | 1.63E-38   |
| GOTERM_BP_FAT   | GO:0045449~regulation of transcription                     | 2.223291648     | 9.46E-37   |
| GOTERM_MF_FAT   | GO:0003677~DNA binding                                     | 2.138657366     | 1.14E-34   |
| GOTERM_BP_FAT   | GO:0006355~regulation of transcription, DNA-dependent      | 2.345325656     | 3.83E-32   |
| GOTERM_BP_FAT   | GO:0051252~regulation of RNA metabolic process             | 2.20086198      | 4.03E-29   |
| SP_PIR_KEYWORDS | transcription regulation                                   | 2.783406778     | 3.22E-29   |
| SP_PIR_KEYWORDS | nucleus                                                    | 2.036421481     | 7.25E-26   |
| SP_PIR_KEYWORDS | Transcription                                              | 2.62344436      | 5.92E-25   |
| GOTERM_MF_FAT   | GO:0043565~sequence-specific DNA binding                   | 2.825795311     | 1.41E-19   |
| GOTERM_BP_FAT   | GO:0006350~transcription                                   | 2.182778334     | 9.20E-18   |
| GOTERM_MF_FAT   | GO:0003702~RNA polymerase II transcription factor activity | 2.637692707     | 5.42E-18   |
| Cluster 2       |                                                            |                 |            |
| Category        | Term                                                       | Fold Enrichment | Bonferroni |
| GOTERM_BP_FAT   | GO:0007444~imaginal disc development                       | 2.91469218      | 6.56E-40   |
| GOTERM_BP_FAT   | GO:0048569~post-embryonic organ development                | 3.301610555     | 4.61E-39   |
| GOTERM_BP_FAT   | GO:0009886~post-embryonic morphogenesis                    | 2.979135229     | 1.15E-35   |
| GOTERM_BP_FAT   | GO:0048707~instar larval or pupal morphogenesis            | 2.989692956     | 2.47E-35   |
| GOTERM_BP_FAT   | GO:0007560~imaginal disc morphogenesis                     | 3.22756188      | 6.33E-35   |
| GOTERM_BP_FAT   | GO:0048563~post-embryonic organ morphogenesis              | 3.22756188      | 6.33E-35   |
| GOTERM_BP_FAT   | GO:0007552~metamorphosis                                   | 2.924697171     | 8.37E-35   |
| GOTERM_BP_FAT   | GO:0009791~post-embryonic development                      | 2.701453036     | 7.62E-34   |
| GOTERM_BP_FAT   | GO:0002165~instar larval or pupal development              | 2.651865686     | 1.24E-30   |
| GOTERM_BP_FAT   | GO:0035107~appendage morphogenesis                         | 3.083025666     | 1.21E-25   |

|               |                                                          |             |          |
|---------------|----------------------------------------------------------|-------------|----------|
| GOTERM_BP_FAT | GO:0048736~appendage development                         | 3.061779884 | 1.29E-25 |
| GOTERM_BP_FAT | GO:0035114~imaginal disc-derived appendage morphogenesis | 3.091994022 | 1.71E-25 |
| GOTERM_BP_FAT | GO:0048737~imaginal disc-derived appendage development   | 3.070338318 | 1.84E-25 |
| GOTERM_BP_FAT | GO:0035220~wing disc development                         | 2.832141253 | 1.00E-23 |
| GOTERM_BP_FAT | GO:0035120~post-embryonic appendage morphogenesis        | 3.040841618 | 3.83E-23 |
| GOTERM_BP_FAT | GO:0007476~imaginal disc-derived wing morphogenesis      | 2.966115825 | 2.47E-20 |
| GOTERM_BP_FAT | GO:0007472~wing disc morphogenesis                       | 2.939151135 | 5.34E-20 |

#### Cluster 3

| Category      | Term                                                             | Fold Enrichment | Bonferroni |
|---------------|------------------------------------------------------------------|-----------------|------------|
| GOTERM_BP_FAT | GO:0030182~neuron differentiation                                | 2.883951731     | 2.19E-38   |
| GOTERM_BP_FAT | GO:0000902~cell morphogenesis                                    | 2.716862394     | 3.69E-35   |
| GOTERM_BP_FAT | GO:0048666~neuron development                                    | 2.928260909     | 2.73E-33   |
| GOTERM_BP_FAT | GO:0032989~cellular component morphogenesis                      | 2.455423898     | 8.97E-31   |
| GOTERM_BP_FAT | GO:0000904~cell morphogenesis involved in differentiation        | 2.954820639     | 2.67E-29   |
| GOTERM_BP_FAT | GO:0048812~neuron projection morphogenesis                       | 3.006232353     | 7.69E-29   |
| GOTERM_BP_FAT | GO:0031175~neuron projection development                         | 2.995757676     | 1.15E-28   |
| GOTERM_BP_FAT | GO:0048667~cell morphogenesis involved in neuron differentiation | 2.98535574      | 1.71E-28   |
| GOTERM_BP_FAT | GO:0030030~cell projection organization                          | 2.647580972     | 4.42E-26   |
| GOTERM_BP_FAT | GO:0006928~cell motion                                           | 2.818958862     | 1.06E-25   |
| GOTERM_BP_FAT | GO:0048858~cell projection morphogenesis                         | 2.753435542     | 2.71E-25   |
| GOTERM_BP_FAT | GO:0032990~cell part morphogenesis                               | 2.661931641     | 1.07E-23   |
| GOTERM_BP_FAT | GO:0007409~axonogenesis                                          | 3.15806227      | 7.65E-22   |
| GOTERM_BP_FAT | GO:0007411~axon guidance                                         | 3.605067407     | 1.63E-20   |
| GOTERM_BP_FAT | GO:0016358~dendrite development                                  | 2.915134403     | 5.71E-09   |
| GOTERM_BP_FAT | GO:0048813~dendrite morphogenesis                                | 2.915134403     | 5.71E-09   |

#### Cluster 4

| Category      | Term                               | Fold Enrichment | Bonferroni |
|---------------|------------------------------------|-----------------|------------|
| GOTERM_BP_FAT | GO:0048729~tissue morphogenesis    | 3.221990656     | 1.04E-29   |
| GOTERM_BP_FAT | GO:0048598~embryonic morphogenesis | 3.081206772     | 1.11E-23   |
| GOTERM_BP_FAT | GO:0002009~morphogenesis of        | 3.031739779     | 1.74E-22   |

|                 |                                                                             |                 |            |
|-----------------|-----------------------------------------------------------------------------|-----------------|------------|
|                 | an epithelium                                                               |                 |            |
| GOTERM_BP_FAT   | GO:0060429~epithelium development                                           | 2.963203109     | 4.17E-22   |
| GOTERM_BP_FAT   | GO:0016331~morphogenesis of embryonic epithelium                            | 3.079110713     | 4.41E-11   |
| GOTERM_BP_FAT   | GO:0007391~dorsal closure                                                   | 3.291033313     | 3.60E-10   |
|                 | GO:0001700~embryonic development via the syncytial blastoderm               | 2.423886579     | 3.79E-10   |
| GOTERM_BP_FAT   | GO:0009792~embryonic development ending in birth or egg hatching            | 2.315677356     | 4.87E-09   |
| Cluster 5       |                                                                             |                 |            |
| Category        | Term                                                                        | Fold Enrichment | Bonferroni |
| SP_PIR_KEYWORDS | Homeobox                                                                    | 4.290958005     | 7.77E-22   |
|                 | GO:0043565~sequence-specific DNA binding                                    | 2.825795311     | 1.41E-19   |
| GOTERM_MF_FAT   | IPR017970:Homeobox, conserved site                                          | 4.100168166     | 3.81E-19   |
| INTERPRO        | IPR001356:Homeobox                                                          | 3.970073703     | 1.22E-18   |
| INTERPRO        | IPR012287:Homeodomain-related                                               | 3.683821758     | 6.11E-16   |
| SMART           | SM00389:HOX                                                                 | 3.171821064     | 5.63E-15   |
| UP_SEQ_FEATURE  | DNA-binding region:Homeobox                                                 | 3.93258427      | 1.55E-12   |
| Cluster 6       |                                                                             |                 |            |
| Category        | Term                                                                        | Fold Enrichment | Bonferroni |
| GOTERM_BP_FAT   | GO:0006928~cell motion                                                      | 2.818958862     | 1.06E-25   |
| GOTERM_BP_FAT   | GO:0016477~cell migration                                                   | 2.72044507      | 7.71E-12   |
| GOTERM_BP_FAT   | GO:0048870~cell motility                                                    | 2.545871055     | 3.15E-10   |
| GOTERM_BP_FAT   | GO:0051674~localization of cell                                             | 2.501475344     | 3.44E-10   |
| Cluster 7       |                                                                             |                 |            |
| Category        | Term                                                                        | Fold Enrichment | Bonferroni |
| GOTERM_BP_FAT   | GO:0007155~cell adhesion                                                    | 2.817753836     | 2.75E-13   |
|                 | GO:0022610~biological adhesion                                              | 2.607921103     | 3.28E-11   |
| GOTERM_BP_FAT   | GO:0016337~cell-cell adhesion                                               | 3.372168187     | 9.57E-06   |
| Cluster 8       |                                                                             |                 |            |
| Category        | Term                                                                        | Fold Enrichment | Bonferroni |
|                 | GO:0007167~enzyme linked receptor protein signaling pathway                 | 2.989269287     | 1.10E-12   |
| GOTERM_BP_FAT   | GO:0007169~transmembrane receptor protein tyrosine kinase signaling pathway | 2.998710504     | 5.40E-09   |
| GOTERM_BP_FAT   | GO:0007173~epidermal growth factor receptor signaling pathway               | 4.342335621     | 1.81E-06   |
| Cluster 9       |                                                                             |                 |            |
| Category        | Term                                                                        | Fold Enrichment | Bonferroni |
|                 | GO:0007447~imaginal disc pattern formation                                  | 3.848888392     | 2.47E-16   |
| GOTERM_BP_FAT   | GO:0035222~wing disc pattern formation                                      | 3.552820054     | 2.36E-08   |

|               |                                                            |                 |            |
|---------------|------------------------------------------------------------|-----------------|------------|
| GOTERM_BP_FAT | GO:0009953~dorsal/ventral pattern formation                | 2.684352929     | 4.12E-08   |
| GOTERM_BP_FAT | GO:0007450~dorsal/ventral pattern formation, imaginal disc | 3.61515023      | 6.24E-07   |
| GOTERM_BP_FAT | GO:0048190~wing disc dorsal/ventral pattern formation      | 3.268594449     | 6.33E-04   |
| Cluster 10    |                                                            |                 |            |
| Category      | Term                                                       | Fold Enrichment | Bonferroni |
| GOTERM_BP_FAT | GO:0048859~formation of anatomical boundary                | 5.16773826      | 5.09E-14   |
| GOTERM_BP_FAT | GO:0048645~organ formation                                 | 5.329230081     | 2.75E-13   |
| GOTERM_BP_FAT | GO:0010160~formation of organ boundary                     | 5.235734816     | 4.68E-12   |
| GOTERM_BP_FAT | GO:0008052~sensory organ boundary specification            | 4.943053988     | 6.10E-05   |
| GOTERM_BP_FAT | GO:0007432~salivary gland boundary specification           | 5.684512086     | 7.98E-04   |
| Cluster 11    |                                                            |                 |            |
| Category      | Term                                                       | Fold Enrichment | Bonferroni |
| GOTERM_BP_FAT | GO:0014016~neuroblast differentiation                      | 5.583002942     | 1.19E-09   |
| GOTERM_BP_FAT | GO:0014017~neuroblast fate commitment                      | 5.526608972     | 6.45E-09   |
| GOTERM_BP_FAT | GO:0007400~neuroblast fate determination                   | 5.400286482     | 1.83E-07   |
| GOTERM_BP_FAT | GO:0007419~ventral cord development                        | 4.58428394      | 3.67E-06   |
| Cluster 12    |                                                            |                 |            |
| Category      | Term                                                       | Fold Enrichment | Bonferroni |
| GOTERM_BP_FAT | GO:0007423~sensory organ development                       | 2.616955259     | 9.37E-29   |
| GOTERM_BP_FAT | GO:0001654~eye development                                 | 2.482693532     | 5.27E-19   |
| GOTERM_BP_FAT | GO:0048749~compound eye development                        | 2.46851783      | 4.55E-17   |
| GOTERM_BP_FAT | GO:0048592~eye morphogenesis                               | 2.377351709     | 1.65E-12   |
| GOTERM_BP_FAT | GO:0001745~compound eye morphogenesis                      | 2.387495076     | 1.16E-11   |
| GOTERM_BP_FAT | GO:0046530~photoreceptor cell differentiation              | 2.99769192      | 4.96E-11   |
| GOTERM_BP_FAT | GO:0001751~compound eye photoreceptor cell differentiation | 2.816650133     | 2.04E-07   |
| GOTERM_BP_FAT | GO:0001754~eye photoreceptor cell differentiation          | 2.756498318     | 2.78E-07   |
| GOTERM_BP_FAT | GO:0042461~photoreceptor cell development                  | 3.15806227      | 5.48E-05   |
| Cluster 13    |                                                            |                 |            |
| Category      | Term                                                       | Fold Enrichment | Bonferroni |
| GOTERM_BP_FAT | GO:0035218~leg disc development                            | 4.876419682     | 2.08E-14   |

|               |                                                             |             |          |
|---------------|-------------------------------------------------------------|-------------|----------|
| GOTERM_BP_FAT | GO:0007449~proximal/distal pattern formation, imaginal disc | 6.090548664 | 2.50E-08 |
| GOTERM_BP_FAT | GO:0009954~proximal/distal pattern formation                | 5.560935736 | 3.19E-07 |
| GOTERM_BP_FAT | GO:0007479~leg disc proximal/distal pattern formation       | 5.773332587 | 1.48E-04 |
| GOTERM_BP_FAT | GO:0035223~leg disc pattern formation                       | 5.773332587 | 1.48E-04 |

#### Cluster 14

| Category      | Term                                                                                                    | Fold Enrichment | Bonferroni |
|---------------|---------------------------------------------------------------------------------------------------------|-----------------|------------|
| GOTERM_BP_FAT | GO:0010628~positive regulation of gene expression                                                       | 2.79367047      | 9.82E-08   |
| GOTERM_BP_FAT | GO:0045941~positive regulation of transcription                                                         | 2.756498318     | 2.78E-07   |
| GOTERM_BP_FAT | GO:0010557~positive regulation of macromolecule biosynthetic process                                    | 2.64395911      | 3.25E-07   |
| GOTERM_BP_FAT | GO:0010604~positive regulation of macromolecule metabolic process                                       | 2.552025672     | 3.44E-07   |
| GOTERM_BP_FAT | GO:0045935~positive regulation of nucleobase, nucleoside, nucleotide and nucleic acid metabolic process | 2.642593428     | 1.37E-06   |
| GOTERM_BP_FAT | GO:0051173~positive regulation of nitrogen compound metabolic process                                   | 2.642593428     | 1.37E-06   |
| GOTERM_BP_FAT | GO:0031328~positive regulation of cellular biosynthetic process                                         | 2.368546702     | 6.69E-06   |
| GOTERM_BP_FAT | GO:0009891~positive regulation of biosynthetic process                                                  | 2.368546702     | 6.69E-06   |
| GOTERM_BP_FAT | GO:0045893~positive regulation of transcription, DNA-dependent                                          | 2.826106861     | 2.12E-05   |
| GOTERM_BP_FAT | GO:0051254~positive regulation of RNA metabolic process                                                 | 2.763304486     | 4.16E-05   |
| GOTERM_MF_FAT | GO:0016563~transcription activator activity                                                             | 2.630090444     | 6.04E-05   |

#### Cluster 15

| Category      | Term                                       | Fold Enrichment | Bonferroni |
|---------------|--------------------------------------------|-----------------|------------|
| GOTERM_BP_FAT | GO:0007498~mesoderm development            | 3.66994599      | 2.75E-13   |
| GOTERM_BP_FAT | GO:0007369~gastrulation                    | 3.848888392     | 1.87E-11   |
| GOTERM_BP_FAT | GO:0048332~mesoderm morphogenesis          | 5.000265261     | 1.34E-06   |
| GOTERM_BP_FAT | GO:0001704~formation of primary germ layer | 4.737093405     | 1.63E-06   |
| GOTERM_BP_FAT | GO:0001707~mesoderm formation              | 4.919289305     | 6.48E-06   |
| GOTERM_BP_FAT | GO:0001710~mesodermal cell fate commitment | 5.684512086     | 7.98E-04   |

|               |                                                          |                 |            |
|---------------|----------------------------------------------------------|-----------------|------------|
| GOTERM_BP_FAT | GO:0048333~mesodermal cell differentiation               | 5.684512086     | 7.98E-04   |
| Cluster 16    |                                                          |                 |            |
| Category      | Term                                                     | Fold Enrichment | Bonferroni |
| GOTERM_BP_FAT | GO:0048732~gland development                             | 3.400244959     | 1.64E-21   |
| GOTERM_BP_FAT | GO:0007431~salivary gland development                    | 3.322781345     | 9.27E-17   |
| GOTERM_BP_FAT | GO:0035272~exocrine system development                   | 3.322781345     | 9.27E-17   |
| GOTERM_BP_FAT | GO:0022612~gland morphogenesis                           | 2.867188114     | 3.46E-08   |
| GOTERM_BP_FAT | GO:0007435~salivary gland morphogenesis                  | 2.867188114     | 3.46E-08   |
| Cluster 17    |                                                          |                 |            |
| Category      | Term                                                     | Fold Enrichment | Bonferroni |
| GOTERM_BP_FAT | GO:0051301~cell division                                 | 2.114361203     | 2.12E-05   |
| GOTERM_BP_FAT | GO:0008356~asymmetric cell division                      | 3.307797981     | 3.19E-05   |
| GOTERM_BP_FAT | GO:0017145~stem cell division                            | 3.483156915     | 3.56E-05   |
| Cluster 18    |                                                          |                 |            |
| Category      | Term                                                     | Fold Enrichment | Bonferroni |
| GOTERM_BP_FAT | GO:0035051~cardiac cell differentiation                  | 7.105640107     | 2.48E-12   |
| GOTERM_BP_FAT | GO:0010002~cardioblast differentiation                   | 7.105640107     | 1.59E-06   |
| Cluster 19    |                                                          |                 |            |
| Category      | Term                                                     | Fold Enrichment | Bonferroni |
| GOTERM_BP_FAT | GO:0007163~establishment or maintenance of cell polarity | 2.868331786     | 1.01E-07   |
| GOTERM_BP_FAT | GO:0001738~morphogenesis of a polarized epithelium       | 3.248292621     | 1.84E-06   |
| GOTERM_BP_FAT | GO:0007164~establishment of tissue polarity              | 3.323605857     | 7.14E-06   |
| GOTERM_BP_FAT | GO:0001736~establishment of planar polarity              | 3.261605295     | 2.35E-05   |
| GOTERM_BP_FAT | GO:0042067~establishment of ommatidial polarity          | 3.552820054     | 9.90E-05   |
| Cluster 20    |                                                          |                 |            |
| Category      | Term                                                     | Fold Enrichment | Bonferroni |
| GOTERM_BP_FAT | GO:0035218~leg disc development                          | 4.876419682     | 2.08E-14   |
| GOTERM_BP_FAT | GO:0035110~leg morphogenesis                             | 4.737093405     | 2.03E-09   |
| GOTERM_BP_FAT | GO:0035108~limb morphogenesis                            | 4.61866607      | 4.70E-09   |
| GOTERM_BP_FAT | GO:0060173~limb development                              | 4.61866607      | 4.70E-09   |
| GOTERM_BP_FAT | GO:0007478~leg disc morphogenesis                        | 4.813498137     | 3.50E-07   |
| GOTERM_BP_FAT | GO:0035127~post-embryonic limb morphogenesis             | 4.655419381     | 7.49E-06   |
| GOTERM_BP_FAT | GO:0007480~imaginal disc-                                | 4.655419381     | 7.49E-06   |

|               |                                                                                      |                 |            |
|---------------|--------------------------------------------------------------------------------------|-----------------|------------|
| GOTERM_BP_FAT | derived leg morphogenesis<br>GO:0035109~imaginal disc-<br>derived limb morphogenesis | 4.500238735     | 1.63E-05   |
| Cluster 21    |                                                                                      |                 |            |
| Category      | Term                                                                                 | Fold Enrichment | Bonferroni |
| GOTERM_BP_FAT | GO:0060541~respiratory<br>system development                                         | 3.018735993     | 3.81E-14   |
| GOTERM_BP_FAT | GO:0007424~open tracheal<br>system development                                       | 3.018735993     | 3.81E-14   |
| GOTERM_BP_FAT | GO:0035295~tube<br>development                                                       | 3.373384697     | 1.46E-11   |
| GOTERM_BP_FAT | GO:0035239~tube<br>morphogenesis                                                     | 3.129865285     | 2.46E-07   |
| GOTERM_BP_FAT | GO:0001763~morphogenesis of<br>a branching structure                                 | 3.891183868     | 1.13E-05   |
| GOTERM_BP_FAT | GO:0060446~branching<br>involved in open tracheal<br>system development              | 3.643918004     | 5.82E-04   |
| GOTERM_BP_FAT | GO:0048754~branching<br>morphogenesis of a tube                                      | 3.643918004     | 5.82E-04   |
| Cluster 22    |                                                                                      |                 |            |
| Category      | Term                                                                                 | Fold Enrichment | Bonferroni |
| GOTERM_BP_FAT | GO:0048565~gut development                                                           | 3.893501429     | 4.68E-12   |
| GOTERM_BP_FAT | GO:0048567~ectodermal gut<br>morphogenesis                                           | 3.707290491     | 1.64E-05   |
| GOTERM_BP_FAT | GO:0007439~ectodermal gut<br>development                                             | 3.707290491     | 1.64E-05   |
| GOTERM_BP_FAT | GO:0048547~gut<br>morphogenesis                                                      | 3.62841197      | 2.78E-05   |
| GOTERM_BP_FAT | GO:0048546~digestive tract<br>morphogenesis                                          | 3.552820054     | 4.64E-05   |
| GOTERM_BP_FAT | GO:0055123~digestive system<br>development                                           | 3.552820054     | 4.64E-05   |
| GOTERM_BP_FAT | GO:0007442~hindgut<br>morphogenesis                                                  | 3.552820054     | 4.51E-04   |
| Cluster 23    |                                                                                      |                 |            |
| Category      | Term                                                                                 | Fold Enrichment | Bonferroni |
| GOTERM_BP_FAT | GO:0035215~genital disc<br>development                                               | 5.583002942     | 1.19E-09   |
| GOTERM_BP_FAT | GO:0007445~determination of<br>imaginal disc primordium                              | 7.105640107     | 4.53E-04   |
| GOTERM_BP_FAT | GO:0035225~determination of<br>genital disc primordium                               | 7.105640107     | 4.53E-04   |
| Cluster 24    |                                                                                      |                 |            |
| Category      | Term                                                                                 | Fold Enrichment | Bonferroni |
| GOTERM_BP_FAT | GO:0003006~reproductive<br>developmental process                                     | 1.755345876     | 1.59E-07   |
| GOTERM_BP_FAT | GO:0030707~ovarian follicle<br>cell development                                      | 2.159557288     | 6.36E-06   |
| GOTERM_BP_FAT | GO:0048610~reproductive<br>cellular process                                          | 1.676931065     | 1.15E-05   |
| GOTERM_BP_FAT | GO:0007276~gamete<br>generation                                                      | 1.480755771     | 5.51E-04   |
| GOTERM_BP_FAT | GO:0007292~female gamete                                                             | 1.561679144     | 5.94E-04   |

|                 |                                                                                       |                 |            |
|-----------------|---------------------------------------------------------------------------------------|-----------------|------------|
| GOTERM_BP_FAT   | generation<br>GO:0019953~sexual<br>reproduction                                       | 1.469465709     | 6.66E-04   |
| GOTERM_BP_FAT   | GO:0048477~oogenesis                                                                  | 1.55559468      | 9.67E-04   |
| Cluster 25      |                                                                                       |                 |            |
| Category        | Term                                                                                  | Fold Enrichment | Bonferroni |
| GOTERM_BP_FAT   | GO:0045596~negative<br>regulation of cell differentiation                             | 4.073900328     | 3.36E-14   |
| GOTERM_BP_FAT   | GO:0008356~asymmetric cell<br>division                                                | 3.307797981     | 3.19E-05   |
| Cluster 26      |                                                                                       |                 |            |
| Category        | Term                                                                                  | Fold Enrichment | Bonferroni |
| GOTERM_MF_FAT   | GO:0016564~transcription<br>repressor activity                                        | 3.333975724     | 2.03E-13   |
| GOTERM_BP_FAT   | GO:0006357~regulation of<br>transcription from RNA<br>polymerase II promoter          | 2.627606498     | 8.26E-12   |
| GOTERM_BP_FAT   | GO:0000122~negative<br>regulation of transcription from<br>RNA polymerase II promoter | 3.611063005     | 1.37E-07   |
| GOTERM_BP_FAT   | GO:0010558~negative<br>regulation of macromolecule<br>biosynthetic process            | 1.877506532     | 8.94E-04   |
| Cluster 27      |                                                                                       |                 |            |
| Category        | Term                                                                                  | Fold Enrichment | Bonferroni |
| GOTERM_BP_FAT   | GO:0001667~ameboidal cell<br>migration                                                | 3.99692256      | 5.07E-04   |
| GOTERM_BP_FAT   | GO:0007427~epithelial cell<br>migration, open tracheal<br>system                      | 4.165375235     | 5.82E-04   |
| GOTERM_BP_FAT   | GO:0010631~epithelial cell<br>migration                                               | 4.165375235     | 5.82E-04   |
| Cluster 28      |                                                                                       |                 |            |
| Category        | Term                                                                                  | Fold Enrichment | Bonferroni |
| GOTERM_BP_FAT   | GO:0016337~cell-cell adhesion                                                         | 3.372168187     | 9.57E-06   |
| SP_PIR_KEYWORDS | cell adhesion                                                                         | 3.679802067     | 2.02E-05   |
| Cluster 29      |                                                                                       |                 |            |
| Category        | Term                                                                                  | Fold Enrichment | Bonferroni |
| GOTERM_CC_FAT   | GO:0005912~adherens junction                                                          | 3.358703627     | 1.21E-04   |
| GOTERM_CC_FAT   | GO:0070161~anchoring<br>junction                                                      | 3.288730635     | 1.87E-04   |
| GOTERM_CC_FAT   | GO:0030054~cell junction                                                              | 2.195461971     | 4.38E-04   |
| Cluster 30      |                                                                                       |                 |            |
| Category        | Term                                                                                  | Fold Enrichment | Bonferroni |
| GOTERM_BP_FAT   | GO:0040008~regulation of<br>growth                                                    | 2.759471886     | 3.40E-06   |
| Cluster 31      |                                                                                       |                 |            |
| Category        | Term                                                                                  | Fold Enrichment | Bonferroni |
| INTERPRO        | IPR001092:Basic helix-loop-<br>helix dimerisation region bHLH                         | 3.186633009     | 1.19E-04   |
| UP_SEQ_FEATURE  | DNA-binding region:Basic motif                                                        | 3.162010325     | 8.88E-04   |



| Cluster 32    |                                                                  |                 |            |
|---------------|------------------------------------------------------------------|-----------------|------------|
| Category      | Term                                                             | Fold Enrichment | Bonferroni |
| GOTERM_BP_FAT | GO:0007389~pattern specification process                         | 2.605401373     | 5.23E-34   |
| GOTERM_BP_FAT | GO:0003002~regionalization                                       | 2.629399864     | 8.19E-33   |
| GOTERM_BP_FAT | GO:0035282~segmentation                                          | 2.377656497     | 4.41E-12   |
| GOTERM_BP_FAT | GO:0009880~embryonic pattern specification                       | 2.430067396     | 2.78E-11   |
| GOTERM_BP_FAT | GO:0007350~blastoderm segmentation                               | 2.444600954     | 1.02E-10   |
| GOTERM_BP_FAT | GO:0009952~anterior/posterior pattern formation                  | 2.089894149     | 8.35E-04   |
| Cluster 33    |                                                                  |                 |            |
| Category      | Term                                                             | Fold Enrichment | Bonferroni |
| GOTERM_BP_FAT | GO:0042692~muscle cell differentiation                           | 2.976687072     | 4.34E-05   |
| Cluster 34    |                                                                  |                 |            |
| Category      | Term                                                             | Fold Enrichment | Bonferroni |
| GOTERM_BP_FAT | GO:0008038~neuron recognition                                    | 3.335300459     | 4.08E-04   |
| GOTERM_BP_FAT | GO:0008037~cell recognition                                      | 3.268594449     | 6.33E-04   |
| Cluster 35    |                                                                  |                 |            |
| Category      | Term                                                             | Fold Enrichment | Bonferroni |
| GOTERM_BP_FAT | GO:0007365~periodic partitioning                                 | 3.289648198     | 1.42E-04   |
| Cluster 36    |                                                                  |                 |            |
| Category      | Term                                                             | Fold Enrichment | Bonferroni |
| GOTERM_BP_FAT | GO:0035287~head segmentation                                     | 5.07545722      | 1.20E-04   |
| Cluster 37    |                                                                  |                 |            |
| Category      | Term                                                             | Fold Enrichment | Bonferroni |
| GOTERM_BP_FAT | GO:0051960~regulation of nervous system development              | 3.15806227      | 2.67E-08   |
| GOTERM_BP_FAT | GO:0060284~regulation of cell development                        | 2.657834849     | 1.64E-07   |
| GOTERM_BP_FAT | GO:0050767~regulation of neurogenesis                            | 3.393738559     | 4.71E-07   |
| GOTERM_BP_FAT | GO:0045664~regulation of neuron differentiation                  | 3.289648198     | 1.42E-04   |
| Cluster 38    |                                                                  |                 |            |
| Category      | Term                                                             | Fold Enrichment | Bonferroni |
| GOTERM_BP_FAT | GO:0035152~regulation of tube architecture, open tracheal system | 4.113791641     | 7.04E-06   |
| GOTERM_BP_FAT | GO:0048871~multicellular organismal homeostasis                  | 5.433724788     | 4.38E-04   |
| GOTERM_BP_FAT | GO:0001894~tissue homeostasis                                    | 5.433724788     | 4.38E-04   |
| Cluster 39    |                                                                  |                 |            |
| Category      | Term                                                             | Fold Enrichment | Bonferroni |

|                 |                                                  |                 |             |
|-----------------|--------------------------------------------------|-----------------|-------------|
| GOTERM_BP_FAT   | GO:0017145~stem cell division                    | 3.483156915     | 3.56E-05    |
| GOTERM_BP_FAT   | GO:0048103~somatic stem cell division            | 3.920353163     | 0.004190168 |
| Cluster 40      |                                                  |                 |             |
| Category        | Term                                             | Fold Enrichment | Bonferroni  |
| GOTERM_BP_FAT   | GO:0042659~regulation of cell fate specification | 5.329230081     | 4.60E-05    |
| GOTERM_BP_FAT   | GO:0010453~regulation of cell fate commitment    | 5.329230081     | 4.60E-05    |
| Cluster 41      |                                                  |                 |             |
| Category        | Term                                             | Fold Enrichment | Bonferroni  |
| UP_SEQ_FEATURE  | DNA-binding region:Basic motif                   | 3.162010325     | 8.88E-04    |
| UP_SEQ_FEATURE  | domain:Helix-loop-helix motif                    | 3.307876873     | 0.001503761 |
| Cluster 42      |                                                  |                 |             |
| Category        | Term                                             | Fold Enrichment | Bonferroni  |
| GOTERM_BP_FAT   | GO:0007548~sex differentiation                   | 3.079110713     | 3.56E-04    |
| Cluster 43      |                                                  |                 |             |
| Category        | Term                                             | Fold Enrichment | Bonferroni  |
| SP_PIR_KEYWORDS | zinc finger                                      | 3.469902484     | 3.44E-05    |
| Cluster 44      |                                                  |                 |             |
| Category        | Term                                             | Fold Enrichment | Bonferroni  |
| GOTERM_BP_FAT   | GO:0042692~muscle cell differentiation           | 2.976687072     | 4.34E-05    |
| Cluster 45      |                                                  |                 |             |
| Category        | Term                                             | Fold Enrichment | Bonferroni  |
| SP_PIR_KEYWORDS | zinc finger                                      | 3.469902484     | 3.44E-05    |
| Cluster 46      |                                                  |                 |             |
| Category        | Term                                             | Fold Enrichment | Bonferroni  |
| SP_PIR_KEYWORDS | egf-like domain                                  | 3.168171833     | 8.12E-04    |
| Cluster 47      |                                                  |                 |             |
| Category        | Term                                             | Fold Enrichment | Bonferroni  |
| GOTERM_CC_FAT   | GO:0030054~cell junction                         | 2.195461971     | 4.38E-04    |
| GOTERM_CC_FAT   | GO:0005911~cell-cell junction                    | 2.947044335     | 9.20E-04    |
| Cluster 48      |                                                  |                 |             |
| Category        | Term                                             | Fold Enrichment | Bonferroni  |
| SP_PIR_KEYWORDS | zinc-finger                                      | 1.886777493     | 1.14E-05    |
| SP_PIR_KEYWORDS | zinc                                             | 1.546827149     | 3.95E-04    |
| Cluster 49      |                                                  |                 |             |
| Category        | Term                                             | Fold Enrichment | Bonferroni  |
| GOTERM_BP_FAT   | GO:0048634~regulation of muscle development      | 3.875803695     | 9.09E-04    |
| Cluster 50      |                                                  |                 |             |
| Category        | Term                                             | Fold Enrichment | Bonferroni  |
| SP_PIR_KEYWORDS | glycoprotein                                     | 1.68032759      | 9.86E-05    |

---

**C. D. virilis +/- 3kb from Yan bound region**

---

| Cluster 1     |                                                                  |                 |            |
|---------------|------------------------------------------------------------------|-----------------|------------|
| Category      | Term                                                             | Fold Enrichment | Bonferroni |
| GOTERM_BP_FAT | GO:0007444~imaginal disc development                             | 2.437469694     | 2.68E-17   |
| GOTERM_BP_FAT | GO:0048569~post-embryonic organ development                      | 2.669424545     | 9.52E-16   |
| GOTERM_BP_FAT | GO:0009791~post-embryonic development                            | 2.273316387     | 1.92E-14   |
| GOTERM_BP_FAT | GO:0007552~metamorphosis                                         | 2.409118781     | 3.22E-14   |
| GOTERM_BP_FAT | GO:0009886~post-embryonic morphogenesis                          | 2.420631153     | 5.09E-14   |
| GOTERM_BP_FAT | GO:0048707~instar larval or pupal morphogenesis                  | 2.41171353      | 2.75E-13   |
| GOTERM_BP_FAT | GO:0007560~imaginal disc morphogenesis                           | 2.574490785     | 2.75E-13   |
| GOTERM_BP_FAT | GO:0048563~post-embryonic organ morphogenesis                    | 2.574490785     | 2.75E-13   |
| GOTERM_BP_FAT | GO:0002165~instar larval or pupal development                    | 2.170663643     | 2.12E-11   |
| GOTERM_BP_FAT | GO:0035220~wing disc development                                 | 2.382532655     | 8.07E-10   |
| GOTERM_BP_FAT | GO:0035120~post-embryonic appendage morphogenesis                | 2.500399847     | 5.21E-09   |
| GOTERM_BP_FAT | GO:0048736~appendage development                                 | 2.435036048     | 5.76E-09   |
| GOTERM_BP_FAT | GO:0035107~appendage morphogenesis                               | 2.438883334     | 7.91E-09   |
| GOTERM_BP_FAT | GO:0048737~imaginal disc-derived appendage development           | 2.428846777     | 9.71E-09   |
| GOTERM_BP_FAT | GO:0035114~imaginal disc-derived appendage morphogenesis         | 2.43263877      | 1.34E-08   |
| GOTERM_BP_FAT | GO:0007476~imaginal disc-derived wing morphogenesis              | 2.464931931     | 5.29E-08   |
| GOTERM_BP_FAT | GO:0007472~wing disc morphogenesis                               | 2.442523459     | 8.00E-08   |
| Cluster 2     |                                                                  |                 |            |
| Category      | Term                                                             | Fold Enrichment | Bonferroni |
| GOTERM_BP_FAT | GO:0048666~neuron development                                    | 2.437099988     | 4.69E-14   |
| GOTERM_BP_FAT | GO:0006928~cell motion                                           | 2.512759957     | 2.75E-13   |
| GOTERM_BP_FAT | GO:0030182~neuron differentiation                                | 2.239967002     | 1.65E-12   |
| GOTERM_BP_FAT | GO:0000902~cell morphogenesis                                    | 2.052799554     | 9.75E-10   |
| GOTERM_BP_FAT | GO:0048667~cell morphogenesis involved in neuron differentiation | 2.294036718     | 9.16E-09   |
| GOTERM_BP_FAT | GO:0048812~neuron projection morphogenesis                       | 2.279277881     | 1.83E-08   |
| GOTERM_BP_FAT | GO:0007411~axon guidance                                         | 2.979548867     | 2.16E-08   |
| GOTERM_BP_FAT | GO:0031175~neuron projection development                         | 2.271336146     | 2.19E-08   |
| GOTERM_BP_FAT | GO:0000904~cell morphogenesis involved in                        | 2.209543485     | 4.70E-08   |

|               |                                             |             |          |
|---------------|---------------------------------------------|-------------|----------|
|               | differentiation                             |             |          |
| GOTERM_BP_FAT | GO:0007409~axonogenesis                     | 2.535953318 | 7.85E-08 |
| GOTERM_BP_FAT | GO:0048858~cell projection morphogenesis    | 2.147218368 | 1.11E-07 |
| GOTERM_BP_FAT | GO:0030030~cell projection organization     | 2.051434479 | 1.63E-07 |
| GOTERM_BP_FAT | GO:0032990~cell part morphogenesis          | 2.102474257 | 2.45E-07 |
| GOTERM_BP_FAT | GO:0032989~cellular component morphogenesis | 1.83664654  | 3.76E-07 |

#### Cluster 3

| Category        | Term                                                       | Fold Enrichment | Bonferroni |
|-----------------|------------------------------------------------------------|-----------------|------------|
| GOTERM_MF_FAT   | GO:0030528~transcription regulator activity                | 1.757531472     | 7.09E-09   |
| SP_PIR_KEYWORDS | transcription regulation                                   | 2.081635007     | 5.86E-09   |
| GOTERM_BP_FAT   | GO:0045449~regulation of transcription                     | 1.67582397      | 5.43E-08   |
| GOTERM_MF_FAT   | GO:0003677~DNA binding                                     | 1.623340212     | 1.67E-07   |
| SP_PIR_KEYWORDS | Transcription                                              | 2.003790177     | 8.10E-08   |
| GOTERM_BP_FAT   | GO:0051252~regulation of RNA metabolic process             | 1.702053438     | 6.48E-07   |
| GOTERM_MF_FAT   | GO:0003700~transcription factor activity                   | 1.956755528     | 4.17E-07   |
| GOTERM_BP_FAT   | GO:0006355~regulation of transcription, DNA-dependent      | 1.727274706     | 1.72E-06   |
| GOTERM_BP_FAT   | GO:0006350~transcription                                   | 1.861618294     | 1.83E-06   |
| SP_PIR_KEYWORDS | nucleus                                                    | 1.604081705     | 4.57E-07   |
| SP_PIR_KEYWORDS | dna-binding                                                | 1.910170608     | 7.81E-07   |
| GOTERM_MF_FAT   | GO:0043565~sequence-specific DNA binding                   | 2.09219313      | 1.04E-04   |
| GOTERM_MF_FAT   | GO:0003702~RNA polymerase II transcription factor activity | 2.008564611     | 1.52E-04   |
| SP_PIR_KEYWORDS | DNA binding                                                | 2.502069372     | 2.78E-04   |

#### Cluster 4

| Category      | Term                            | Fold Enrichment | Bonferroni |
|---------------|---------------------------------|-----------------|------------|
| GOTERM_BP_FAT | GO:0006928~cell motion          | 2.512759957     | 2.75E-13   |
| GOTERM_BP_FAT | GO:0016477~cell migration       | 2.46654828      | 6.42E-06   |
| GOTERM_BP_FAT | GO:0048870~cell motility        | 2.355374599     | 2.29E-05   |
| GOTERM_BP_FAT | GO:0051674~localization of cell | 2.247219643     | 1.18E-04   |

#### Cluster 5

| Category      | Term                                      | Fold Enrichment | Bonferroni |
|---------------|-------------------------------------------|-----------------|------------|
| GOTERM_BP_FAT | GO:0048729~tissue morphogenesis           | 2.567835109     | 6.39E-11   |
| GOTERM_BP_FAT | GO:0002009~morphogenesis of an epithelium | 2.42739672      | 7.15E-08   |
| GOTERM_BP_FAT | GO:0060429~epithelium development         | 2.361588778     | 1.71E-07   |
| GOTERM_BP_FAT | GO:0048598~embryonic morphogenesis        | 2.33869938      | 7.90E-07   |

| Cluster 6     |                                               |                 |             |
|---------------|-----------------------------------------------|-----------------|-------------|
| Category      | Term                                          | Fold Enrichment | Bonferroni  |
| GOTERM_BP_FAT | GO:0007423~sensory organ development          | 2.105589995     | 7.98E-10    |
| GOTERM_BP_FAT | GO:0042461~photoreceptor cell development     | 3.775329        | 2.64E-06    |
| GOTERM_BP_FAT | GO:0001654~eye development                    | 2.016541193     | 4.49E-06    |
| GOTERM_BP_FAT | GO:0048749~compound eye development           | 2.059270363     | 4.97E-06    |
| Cluster 7     |                                               |                 |             |
| Category      | Term                                          | Fold Enrichment | Bonferroni  |
| GOTERM_BP_FAT | GO:0007155~cell adhesion                      | 2.430096827     | 1.62E-05    |
| GOTERM_BP_FAT | GO:0022610~biological adhesion                | 2.24913217      | 2.23E-04    |
| Cluster 8     |                                               |                 |             |
| Category      | Term                                          | Fold Enrichment | Bonferroni  |
| GOTERM_BP_FAT | GO:0007292~female gamete generation           | 1.629522346     | 0.001014734 |
| GOTERM_BP_FAT | GO:0003006~reproductive developmental process | 1.653882599     | 0.001207502 |
| Cluster 9     |                                               |                 |             |
| Category      | Term                                          | Fold Enrichment | Bonferroni  |
| GOTERM_BP_FAT | GO:0009953~dorsal/ventral pattern formation   | 2.4795988       | 4.47E-04    |
| Cluster 10    |                                               |                 |             |
| Category      | Term                                          | Fold Enrichment | Bonferroni  |
| GOTERM_BP_FAT | GO:0048645~organ formation                    | 4.184322974     | 2.01E-04    |
| GOTERM_BP_FAT | GO:0010160~formation of organ boundary        | 4.172732052     | 5.14E-04    |
| Cluster 11    |                                               |                 |             |
| Category      | Term                                          | Fold Enrichment | Bonferroni  |
| GOTERM_BP_FAT | GO:0007424~open tracheal system development   | 2.648487882     | 1.78E-06    |
| GOTERM_BP_FAT | GO:0060541~respiratory system development     | 2.648487882     | 1.78E-06    |
| Cluster 12    |                                               |                 |             |
| Category      | Term                                          | Fold Enrichment | Bonferroni  |
| GOTERM_BP_FAT | GO:0048732~gland development                  | 2.377916834     | 1.52E-04    |
| GOTERM_BP_FAT | GO:0035272~exocrine system development        | 2.471618266     | 3.28E-04    |
| GOTERM_BP_FAT | GO:0007431~salivary gland development         | 2.471618266     | 3.28E-04    |
| Cluster 13    |                                               |                 |             |
| Category      | Term                                          | Fold Enrichment | Bonferroni  |

|               |                                                 |             |          |
|---------------|-------------------------------------------------|-------------|----------|
| GOTERM_BP_FAT | GO:0007389~pattern specification process        | 2.20227525  | 1.53E-14 |
| GOTERM_BP_FAT | GO:0003002~regionalization                      | 2.211976903 | 8.36E-14 |
| GOTERM_BP_FAT | GO:0009952~anterior/posterior pattern formation | 2.331820853 | 1.96E-04 |

#### Cluster 14

| Category      | Term                                                        | Fold Enrichment | Bonferroni  |
|---------------|-------------------------------------------------------------|-----------------|-------------|
| GOTERM_BP_FAT | GO:0051960~regulation of nervous system development         | 2.936367        | 2.20E-04    |
| GOTERM_BP_FAT | GO:0050767~regulation of neurogenesis                       | 3.155498865     | 0.001335707 |
| GOTERM_BP_FAT | GO:0060284~regulation of cell development                   | 2.420821649     | 0.001865557 |
| GOTERM_BP_FAT | GO:0045664~regulation of neuron differentiation             | 3.0994985       | 0.035862728 |
| GOTERM_BP_FAT | GO:0046532~regulation of photoreceptor cell differentiation | 4.614290999     | 0.086528316 |

#### Cluster 15

| Category      | Term                                     | Fold Enrichment | Bonferroni |
|---------------|------------------------------------------|-----------------|------------|
| GOTERM_MF_FAT | GO:0043565~sequence-specific DNA binding | 2.09219313      | 1.04E-04   |

#### Cluster 16

| Category      | Term                                                   | Fold Enrichment | Bonferroni |
|---------------|--------------------------------------------------------|-----------------|------------|
| GOTERM_BP_FAT | GO:0045596~negative regulation of cell differentiation | 3.05382168      | 8.21E-04   |
