# Supplementary material
Source: PubMed Central journal article supplement (PMC3567750)
Supplement: b6c51ffc318ac3011d66bfc2418703c8_genetics.112.146647-19.pdf [file b6c51ffc318ac3011d66bfc2418703c8_genetics.112.146647-19.pdf]

**Table S4 Yan binding is dynamic across the segmentation network.** Gene expression profiles of Yan putative targets available from the Berkley Drosophila Genome Project {Tomancak, 2007 #122;Tomancak, 2002 #123}.

| Gene | Stage bound by Yan | Classification of Yan binding | Dynamic CHIP pattern? | Gene expression in early embryogenesis                                                            | Gene expression in late embryogenesis                                                                                   |
|------|--------------------|-------------------------------|-----------------------|---------------------------------------------------------------------------------------------------|-------------------------------------------------------------------------------------------------------------------------|
| bcd  | Stg5-7 and Stg11   | multiple->dense               | yes                   | maternal/foregut and ant endoderm stg4-6                                                          | no staining detected                                                                                                    |
| osk  | Stg5-7             | Dense                         | yes                   | maternal/pole cell rapidly degraded stg4-6                                                        | no staining detected                                                                                                    |
| hb   | Stg5-7 and Stg11   | dense                         | yes                   | maternal/foregut, hindgut, vent ectoderm, dors ectoderm, procephalic ectoderm, mesectoderm stg4-6 | central brain glia, neuroblasts of vent nervous sys, procephalic neuroblasts, vent nerve cord, brain, lateral cord glia |
| pum  | Stg5-7 and Stg11   | multiple                      | yes                   | -                                                                                                 | -                                                                                                                       |
| hkb  | Stg5-7 and Stg11   | dense->multiple               | yes                   | foregut, ant endoderm, post endoderm, procephalic ectoderm                                        | central brain glia, vent nervous sys, brain, salivary gland body                                                        |
| til  | Stg5-7 and Stg11   | dense->multiple               | yes                   | -                                                                                                 | -                                                                                                                       |
| ems  | Stg5-7 and         | single->dense                 | yes                   | -                                                                                                 | -                                                                                                                       |

---

|            |                             |                           |            |                                                                                                                                                   |                                                                                                                                       |
|------------|-----------------------------|---------------------------|------------|---------------------------------------------------------------------------------------------------------------------------------------------------|---------------------------------------------------------------------------------------------------------------------------------------|
|            | <b>Stg11</b>                |                           |            |                                                                                                                                                   |                                                                                                                                       |
| <b>btd</b> | <b>Stg5-7 and<br/>Stg11</b> | <b>multiple</b>           | <b>yes</b> | <b>head epidermis,<br/>clypeolabrum, dors<br/>ectoderm, cellular<br/>blastoderm,<br/>hypopharynx, central<br/>brain, procephalic<br/>ectoderm</b> | <b>vent epidermis,<br/>procephalic,<br/>neuroblasts,<br/>head epidermis,<br/>brain, vent<br/>nerve cord, pars<br/>intercerebralis</b> |
| <b>Kr</b>  | <b>Stg5-7 and<br/>Stg11</b> | <b>dense</b>              | <b>yes</b> | <b>visual, hindgut, vent<br/>ectoderm,<br/>procephalic<br/>ectoderm, dors<br/>ectoderm, post<br/>endoderm</b>                                     | <b>Malpighian<br/>tubule, larval<br/>eye, brain,<br/>stomatogastric<br/>nervous sys,<br/>vent nerve cord</b>                          |
| <b>kni</b> | <b>Stg5-7 and<br/>Stg11</b> | <b>dense-&gt;multiple</b> | <b>yes</b> | <b>-</b>                                                                                                                                          | <b>-</b>                                                                                                                              |
| <b>gt</b>  | <b>stg5-7</b>               | <b>dense</b>              | <b>yes</b> | <b>maternal/mesoderm,<br/>dors ectoderm,<br/>ectoderm, cellular<br/>blastoderm, vent e<br/>ctoderm, procephalic<br/>ectoderm stg 4-6</b>          | <b>procrystal cell<br/>plasmacytes,<br/>procephalon</b>                                                                               |
| <b>csw</b> | <b>Stg5-7 and<br/>Stg11</b> | <b>dense</b>              | <b>no</b>  | <b>maternal</b>                                                                                                                                   | <b>no staining<br/>detected</b>                                                                                                       |
| <b>twi</b> | <b>Stg5-7 and<br/>Stg11</b> | <b>dense</b>              | <b>yes</b> | <b>cellular blastoderm,<br/>ant endoderm,<br/>mesoderm</b>                                                                                        | <b>trunk<br/>mesoderm</b>                                                                                                             |
| <b>sna</b> | <b>Stg5-7 and<br/>Stg11</b> | <b>dense</b>              | <b>yes</b> | <b>ant endoderm,<br/>mesoderm</b>                                                                                                                 | <b>lateral cord<br/>neuron, central<br/>brain glia,<br/>procephalic</b>                                                               |

---

---

|      |                     |                 |     |                                                                  |   |                                                                                                                                                                     |
|------|---------------------|-----------------|-----|------------------------------------------------------------------|---|---------------------------------------------------------------------------------------------------------------------------------------------------------------------|
|      |                     |                 |     |                                                                  |   | neuroblasts,<br>brain, lateral<br>cord glia,<br>neuroblasts of<br>vent nervous<br>sys, midline,<br>oocyte, vent<br>sensory<br>complex, vent<br>nerve cord           |
| dpp  | Stg5-7 and<br>Stg11 | dense           | yes |                                                                  |   |                                                                                                                                                                     |
| capu | Stg5-7 and<br>Stg11 | single          | no  | maternal/no staining                                             |   | hindgut proper,<br>dors epidermis,<br>foregut                                                                                                                       |
| spir | stg11               | single          | yes | maternal/ubiquitous                                              |   | hindgut proper,<br>vent epidermis,<br>foregut, post<br>midgut, vent<br>imaginal<br>precursor,<br>rectum, labral<br>sensory<br>complex,<br>clypeo-labral,<br>gnathal |
| gd   | stg5-7              | single          | yes | -                                                                | - |                                                                                                                                                                     |
| Tl   | Stg5-7 and<br>Stg11 | multiple->dense | yes | -                                                                | - |                                                                                                                                                                     |
| h    | Stg5-7 and<br>Stg11 | dense->single   | yes | hypopharynx, vent<br>ectoderm,<br>clypeolabrum, dors<br>ectoderm |   | hindgut proper,<br>hypopharynx,<br>dors epidermis,<br>clypeo-labral                                                                                                 |

---

---

|     |                     |                 |     |                                                                                                   |                                                                                                                                                                                                                                    |
|-----|---------------------|-----------------|-----|---------------------------------------------------------------------------------------------------|------------------------------------------------------------------------------------------------------------------------------------------------------------------------------------------------------------------------------------|
| eve | Stg5-7 and<br>Stg11 | dense->single   | yes | vent ectoderm, dors<br>ectoderm,<br>mesoderm                                                      | cardiac<br>mesoderm, anal<br>pad, vent nerve<br>cord                                                                                                                                                                               |
| run | Stg5-7 and<br>Stg11 | dense->multiple | yes | hindgut, mesoderm,<br>dors ectoderm, vent<br>ectoderm,<br>procephalic<br>ectoderm                 | vent epidermis,<br>procephalic<br>neuroblasts,<br>brain,<br>neuroblasts of<br>vent nervous<br>sys, vent<br>sensory<br>complex, vent<br>nerve cord,<br>central brain<br>neuron                                                      |
| ftz | Stg5-7 and<br>Stg11 | dense->single   | yes | faint ubiquitous/vent<br>ectoderm, dors<br>ectoderm                                               | midline, vent<br>nerve cord                                                                                                                                                                                                        |
| odd | Stg5-7 and<br>Stg11 | dense           | yes | foregut, mesoderm,<br>dors ectoderm,<br>mesectoderm, vent<br>ectoderm,<br>procephalic<br>ectoderm | proventriculus,<br>vent epidermis,<br>pericardial cell,<br>Malpighian<br>tubule, dors<br>epidermis,<br>foregut, cardiac<br>mesoderm,<br>lymph gland,<br>labral sensory<br>complex,<br>atrium, fat<br>body/gonad,<br>clypeo-labral, |

---

---

|       |                     |                 |     |                                                                                                  | dors apodeme                                                                                   |
|-------|---------------------|-----------------|-----|--------------------------------------------------------------------------------------------------|------------------------------------------------------------------------------------------------|
| slp1  | Stg5-7 and<br>Stg11 | multiple->dense | yes | cellular blastoderm,<br>vent ectoderm,<br>mesoderm, dors<br>ectoderm,<br>procephalic<br>ectoderm | procrystal cell,<br>vent epidermis,<br>dors epidermis,<br>midline, clypeo-<br>labral, antennal |
| slp2  | Stg5-7 and<br>Stg11 | single->dense   | yes | ectoderm, vent<br>ectoderm,<br>procephalic<br>ectoderm, dors<br>ectoderm,<br>mesectoderm         | vent epidermis,<br>vent midline,<br>clypeo-labral,<br>brain                                    |
| prd   | Stg5-7              | dense           | yes | trunk mesoderm,<br>vent ectoderm, dors<br>ectoderm                                               | vent ectoderm,<br>clypeolabrum                                                                 |
| opa   | Stg5-7 and<br>Stg11 | both            | no  | maternal/ubiquitous<br>stg4-6                                                                    | faint ubiquitous                                                                               |
| Ubx   | Stg5-7 and<br>Stg11 | dense->multiple | yes | cellular blastoderm,<br>vent ectoderm,<br>mesoderm, dors<br>ectoderm,<br>mesectoderm             | trunk<br>mesoderm, vent<br>nerve cord                                                          |
| abd-A | Stg5-7 and<br>Stg11 | dense           | yes | maternal/yolk stg4-6                                                                             | trunk<br>mesoderm, vent<br>epidermis, dors<br>epidermis, vent<br>nerve cord                    |

---

|       |                     |                 |     |                                                                                                     |                                                                                                                                                                           |
|-------|---------------------|-----------------|-----|-----------------------------------------------------------------------------------------------------|---------------------------------------------------------------------------------------------------------------------------------------------------------------------------|
| Abd-B | Stg5-7 and<br>Stg11 | multiple->dense | yes | vent ectoderm,<br>mesoderm, dors<br>ectoderm                                                        | trunk<br>mesoderm, vent<br>epidermis, vent<br>nerve cord, dors<br>ectoderm                                                                                                |
| Antp  | Stg5-7 and<br>Stg11 | multiple->dense | yes | cellular blastoderm,<br>vent ectoderm, dors<br>ectoderm                                             | lateral cord<br>neuron, vent<br>epidermis,<br>neuroblasts of<br>vent nervous<br>sys, lateral cord<br>glia                                                                 |
| en    | Stg5-7 and<br>Stg11 | dense           | yes | cellular blastoderm,<br>vent ectoderm,<br>mesoderm, dors<br>ectoderm,<br>mesectoderm                | hindgut proper,<br>vent epidermis,<br>head epidermis,<br>brain, somatic<br>muscle, midline,<br>atrium, clypeo-<br>labral, vent<br>nerve cord,<br>lateral cord,<br>gnathal |
| nkd   | Stg5-7 and<br>Stg11 | dense           | no  |                                                                                                     |                                                                                                                                                                           |
| arm   | Stg5-7 and<br>Stg11 | single          | no  | maternal                                                                                            | ubiquitous                                                                                                                                                                |
| gsb   | Stg5-7 and<br>Stg11 | single->dense   | yes | hypopharynx,<br>cellular blastoderm,<br>vent ectoderm, dors<br>ectoderm,<br>procephalic<br>ectoderm | vent ectoderm,<br>hypopharynx,<br>dors ectoderm,<br>antennal                                                                                                              |

---

|              |                             |                            |            |                                                                                                                                                 |                                                                                                                                                                                         |
|--------------|-----------------------------|----------------------------|------------|-------------------------------------------------------------------------------------------------------------------------------------------------|-----------------------------------------------------------------------------------------------------------------------------------------------------------------------------------------|
| <b>gsb-n</b> | <b>Stg5-7 and<br/>Stg11</b> | <b>single-&gt;multiple</b> | <b>yes</b> | <b>no staining detected</b>                                                                                                                     | <b>atrium, vent<br/>nerve cord,<br/>brain, somatic<br/>muscle</b>                                                                                                                       |
| <b>hh</b>    | <b>Stg5-7 and<br/>Stg11</b> | <b>dense</b>               | <b>yes</b> | <b>-</b>                                                                                                                                        | <b>-</b>                                                                                                                                                                                |
| <b>wg</b>    | <b>Stg5-7 and<br/>Stg11</b> | <b>dense</b>               | <b>no</b>  | <b>visual, foregut,<br/>hindgut, mesderm,<br/>dors ectoderm,<br/>mesectoderm,<br/>ectoderm, vent<br/>ectoderm,<br/>procephalic<br/>ectoderm</b> | <b>proventriculus,<br/>hindgut proper,<br/>vent epidermis,<br/>dors epidermis,<br/>visceral muscle,<br/>foregut, brain,<br/>cardiac<br/>mesoderm,<br/>optic lobe,<br/>clypeo-labral</b> |
| <b>ptc</b>   | <b>Stg5-7 and<br/>Stg11</b> | <b>dense</b>               | <b>no</b>  | <b>-</b>                                                                                                                                        | <b>-</b>                                                                                                                                                                                |

---
