# Supplementary material
Source: PubMed Central journal article supplement (PMC3567750)
Supplement: c838127afb1c3d8d3fc5b47b112c7ab6_genetics.112.146647-5.pdf [file c838127afb1c3d8d3fc5b47b112c7ab6_genetics.112.146647-5.pdf]

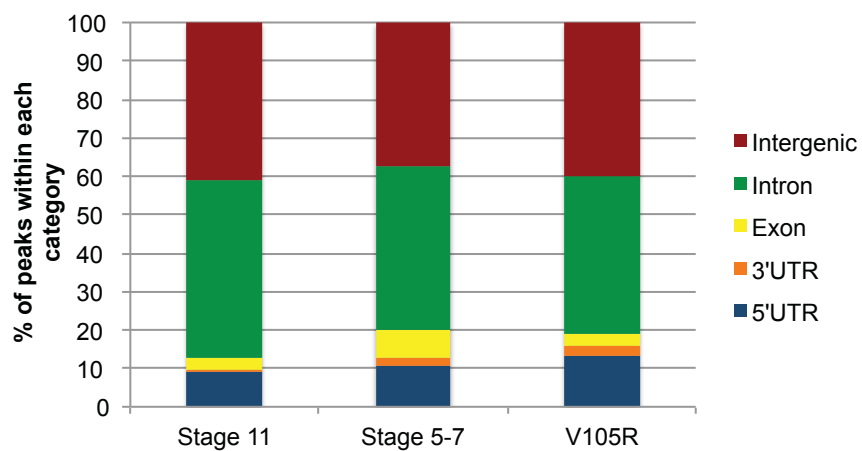

**Figure S1** Yan binds to Introns and Intergenic regions. Distribution of Yan binding regions relative to 5' UTR (blue), 3' UTR (orange), Exons (yellow), Introns (green) and Intergenic regions (red) using Flybase annotation r5.40. If peaks overlapped with more than one annotation, the one with maximum overlap was assigned.
