# Supplementary material
Source: PubMed Central journal article supplement (PMC3567750)
Supplement: d55ca7082e77e348e29f0c11f41cb244_genetics.112.146647-11.pdf [file d55ca7082e77e348e29f0c11f41cb244_genetics.112.146647-11.pdf]

**Table S3** Yan putative targets identified in EGFR perturbation microarrays {Butchar, 2012 #120;Jordan, 2005 #121}.

| Gene    | Tissue     | Classification at Stage 5-7 | Classification at Stage 11 |
|---------|------------|-----------------------------|----------------------------|
| Egfr    | Wing       | Dense                       | Dense                      |
| vvl     | Wing       | Multiple                    | Multiple                   |
| sty     | Wing       | Dense                       | Dense                      |
| pnt     | Wing       | Dense                       | Dense                      |
| mask    | Wing       | Single                      | Single                     |
| tou     | Wing       | Dense                       | Dense                      |
| corto   | Wing       | Dense                       | Dense                      |
| Ect3    | Wing/Ovary | Single                      | Not bound                  |
| salm    | Wing       | Dense                       | Dense                      |
| CG4096  | Wing       | Not bound                   | Single                     |
| Cyp1    | Wing       | Dense                       | Dense                      |
| CG6234  | Wing       | Multiple                    | Dense                      |
| eIF5B   | Wing       | Single                      | Multiple                   |
| CG31048 | Wing       | Dense                       | Dense                      |
| Mkp3    | Wing       | Dense                       | Dense                      |
| ppk7    | Wing       | Single                      | Not bound                  |
| CG4165  | Wing       | Multiple                    | Not bound                  |
| CG14470 | Wing       | Single                      | Not bound                  |
| veli    | Wing       | Single                      | Not bound                  |
| cv-2    | Wing       | Multiple                    | Dense                      |
| SRm160  | Wing       | Single                      | Not bound                  |
| dikar   | Wing       | Single                      | Single                     |
| Cdc37   | Wing       | Not bound                   | Single                     |
| DMAP1   | Wing       | Multiple                    | Multiple                   |
| sec63   | Wing       | Not bound                   | Single                     |
| CG17370 | Wing       | Multiple                    | Multiple                   |
| aralar1 | Wing       | Single                      | Single                     |
| Fhos    | Wing       | Single                      | Single                     |

|           |            |           |           |
|-----------|------------|-----------|-----------|
| dro6      | Wing       | Single    | Single    |
| CG11127   | Wing       | Single    | Not bound |
| Strn-Mlck | Wing       | Dense     | Not bound |
| Tm1       | Wing/Ovary | Multiple  | Single    |
| CG8111    | Wing       | Multiple  | Not bound |
| Eip71CD   | Wing       | Single    | Not bound |
| DAAM      | Wing       | Not bound | Multiple  |
| CG14903   | Wing       | Single    | Not bound |
| CG3788    | Wing       | Not bound | Single    |
| Gip       | Wing       | Not bound | Single    |
| wun2      | Wing       | Not bound | Single    |
| CG8788    | Wing       | Multiple  | Single    |
| Cpr64Aa   | Wing       | Not bound | Single    |
| CG9331    | Wing/Ovary | Single    | Single    |
| CG2444    | Wing       | Single    | Not bound |
| CG9027    | Wing/Ovary | Single    | Single    |
| CG4382    | Wing       | Single    | Single    |
| MESK2     | Ovary      | Single    | Not bound |
| Sara      | Ovary      | Single    | Not bound |
| RhoGAP68  | Ovary      | Single    | Not bound |
| Plc21C    | Ovary      | Not bound | Single    |
| RhoGAP19  | Ovary      | Single    | Not bound |
| Stat92E   | Ovary      | Multiple  | Multiple  |
| ImpL2     | Ovary      | Dense     | Dense     |
| mth       | Ovary      | Single    | Single    |
| POSH      | Ovary      | Not bound | Single    |
| CG7447    | Ovary      | Single    | Not bound |
| CBP       | Ovary      | Single    | Dense     |
| sdk       | Ovary      | Single    | Multiple  |
| ara       | Ovary      | Single    | Multiple  |

---

|            |       |           |           |
|------------|-------|-----------|-----------|
| CG6197     | Ovary | Single    | Single    |
| Dp         | Ovary | Single    | Dense     |
| Rel        | Ovary | Not bound | Single    |
| cg         | Ovary | Single    | Single    |
| Gpdh       | Ovary | Not bound | Single    |
| CG4455     | Ovary | Single    | Not bound |
| Hph        | Ovary | Single    | Multiple  |
| woc        | Ovary | Single    | Not bound |
| CG6509     | Ovary | Single    | Single    |
| CG17486    | Ovary | Single    | Not bound |
| CG1640     | Ovary | Single    | Single    |
| CG10962    | Ovary | Multiple  | Multiple  |
| sgl        | Ovary | Single    | Multiple  |
| Adar       | Ovary | Single    | Single    |
| Psa        | Ovary | Multiple  | Multiple  |
| CG8814     | Ovary | Single    | Not bound |
| Cyp6a22    | Ovary | Single    | Not bound |
| Nup98      | Ovary | Multiple  | Dense     |
| sll        | Ovary | Not bound | Single    |
| alpha-Spec | Ovary | Not bound | Single    |
| CG10077    | Ovary | Single    | Single    |
| polo       | Ovary | Single    | Single    |
| CG3764     | Ovary | Not bound | Single    |
| CG7222     | Ovary | Single    | Single    |
| CG7800     | Ovary | Not bound | Dense     |
| CG6983     | Ovary | Multiple  | Single    |
| CG11399    | Ovary | Single    | Single    |
| CG3563     | Ovary | Multiple  | Multiple  |
| CG3106     | Ovary | Single    | Single    |
| Mes2       | Ovary | Not bound | Dense     |

---

|          |       |           |           |
|----------|-------|-----------|-----------|
| Gdi      | Ovary | Not bound | Single    |
| Glt      | Ovary | Single    | Not bound |
| Hml      | Ovary | Single    | Single    |
| Eip75B   | Ovary | Multiple  | Dense     |
| Dr       | Ovary | Single    | Dense     |
| noc      | Ovary | Dense     | Dense     |
| NK7.1    | Ovary | Single    | Not bound |
| I(3)mbt  | Ovary | Single    | Not bound |
| CG8443   | Ovary | Not bound | Single    |
| ras      | Ovary | Single    | Dense     |
| CG10932  | Ovary | Not bound | Dense     |
| Prat2    | Ovary | Not bound | Single    |
| fng      | Ovary | Not bound | Multiple  |
| Oscillin | Ovary | Multiple  | Not bound |
| CG1518   | Ovary | Dense     | Dense     |
| CG12264  | Ovary | Dense     | Dense     |
| CG17273  | Ovary | Not bound | Single    |
| CG12375  | Ovary | Single    | Single    |
| SdhB     | Ovary | Single    | Not bound |
| c(3)G    | Ovary | Single    | Not bound |
| mnd      | Ovary | Single    | Not bound |
| snapin   | Ovary | Dense     | Dense     |
| shi      | Ovary | Multiple  | Not bound |
| I(1)1Bi  | Ovary | Single    | Not bound |
| bl       | Ovary | Multiple  | Dense     |
| Lola     | Ovary | Multiple  | Dense     |
| Ddx1     | Ovary | Single    | Single    |
| Top3beta | Ovary | Single    | Single    |
| CG5325   | Ovary | Single    | Not bound |
| how      | Ovary | Single    | Not bound |

---

|           |       |           |           |
|-----------|-------|-----------|-----------|
| Nek2      | Ovary | Single    | Dense     |
| CG5147    | Ovary | Single    | Not bound |
| CG18004   | Ovary | Single    | Not bound |
| CG6959    | Ovary | Multiple  | Single    |
| CG9526    | Ovary | Single    | Not bound |
| CG11395   | Ovary | Not bound | Single    |
| CG4329    | Ovary | Single    | Not bound |
| CG7810    | Ovary | Not bound | Single    |
| CG18616   | Ovary | Single    | Single    |
| CG3548    | Ovary | Single    | Not bound |
| CG11470   | Ovary | Single    | Multiple  |
| CG6194    | Ovary | Single    | Single    |
| CG4853    | Ovary | Multiple  | Not bound |
| gp210     | Ovary | Single    | Not bound |
| rho       | Ovary | Dense     | Dense     |
| bt        | Ovary | Multiple  | Single    |
| Arp14D    | Ovary | Not bound | Single    |
| me31B     | Ovary | Not bound | Single    |
| kis       | Ovary | Multiple  | Dense     |
| Ptp4E     | Ovary | Single    | Dense     |
| PhKgamma  | Ovary | Single    | Not bound |
| CG15118   | Ovary | Multiple  | Multiple  |
| Drl-2     | Ovary | Single    | Not bound |
| Rrp4      | Ovary | Single    | Not bound |
| mod(mdg4) | Ovary | Multiple  | Single    |
| CG6094    | Ovary | Single    | Single    |
| Aats-phe  | Ovary | Single    | Single    |
| CG5037    | Ovary | Single    | Single    |
| SamDC     | Ovary | Single    | Not bound |
| CG5382    | Ovary | Single    | Not bound |

---

---

|               |              |                  |                  |
|---------------|--------------|------------------|------------------|
| <b>CG8297</b> | <b>Ovary</b> | <b>Not bound</b> | <b>Single</b>    |
| <b>CG3919</b> | <b>Ovary</b> | <b>Single</b>    | <b>Not bound</b> |

---
