# Supplementary material
Source: PubMed Central journal article supplement (PMC3567750)
Supplement: dd726c1ddfd62d54107703826734f665_genetics.112.146647-6.pdf [file dd726c1ddfd62d54107703826734f665_genetics.112.146647-6.pdf]

**Table S7 GO analysis implicates Yan HDRs in multiple aspects of development.** DAVID was used to perform GO analysis of genes assigned as single-peak (A), multiple-peak (B), or high-density genes (C; see Materials and Methods for details on assigning genes) at stage 11 of embryogenesis. Only clusters that contain a GO-term with a p-value <0.0001 (Bonferroni-corrected) are shown.

| <b>A. Stg11 single peak genes +/- 3kb from Yan bound region</b> |                                                         |                 |                    |
|-----------------------------------------------------------------|---------------------------------------------------------|-----------------|--------------------|
| Cluster 1                                                       |                                                         |                 |                    |
| Category                                                        | Term                                                    | Fold Enrichment | Bonferroni         |
| GOTERM_CC_FAT                                                   | GO:0043232~intracellular non-membrane-bounded organelle | 1.334179681     | <b>0.019328277</b> |
| Cluster 2                                                       |                                                         |                 |                    |
| Category                                                        | Term                                                    | Fold Enrichment | Bonferroni         |
| GOTERM_MF_FAT                                                   | GO:0030528~transcription regulator activity             | 1.42692377      | <b>0.057959603</b> |
| Cluster 3                                                       |                                                         |                 |                    |
| Category                                                        | Term                                                    | Fold Enrichment | Bonferroni         |
| GOTERM_CC_FAT                                                   | GO:0022626~cytosolic ribosome                           | 2.494825855     | <b>0.005017369</b> |
| <b>B. Stg11 multiple peaks +/- 3kb from Yan bound region</b>    |                                                         |                 |                    |
| Cluster 1                                                       |                                                         |                 |                    |
| Category                                                        | Term                                                    | Fold Enrichment | Bonferroni         |
| SP_PIR_KEYWORDS                                                 | dna-binding                                             | 3.823803027     | 8.88E-16           |
| SP_PIR_KEYWORDS                                                 | nucleus                                                 | 2.607485814     | 4.40E-13           |
| GOTERM_MF_FAT                                                   | GO:0003700~transcription factor activity                | 3.321992784     | 1.59E-12           |
| GOTERM_BP_FAT                                                   | GO:0045449~regulation of transcription                  | 2.499234712     | 1.25E-11           |
| GOTERM_MF_FAT                                                   | GO:0030528~transcription regulator activity             | 2.549370415     | 1.66E-11           |
| GOTERM_MF_FAT                                                   | GO:0003677~DNA binding                                  | 2.292939116     | 2.44E-10           |

|                 |                                                               |             |             |
|-----------------|---------------------------------------------------------------|-------------|-------------|
| SP_PIR_KEYWORDS | transcription regulation                                      | 3.397375924 | 1.23E-10    |
| GOTERM_MF_FAT   | GO:0043565~sequence-specific<br>DNA binding                   | 3.881873307 | 5.95E-10    |
| SP_PIR_KEYWORDS | Homeobox                                                      | 6.455570292 | 3.24E-10    |
| INTERPRO        | IPR017970:Homeobox,<br>conserved site                         | 6.136061542 | 7.21E-09    |
| SP_PIR_KEYWORDS | Transcription                                                 | 3.203145565 | 3.15E-09    |
| INTERPRO        | IPR001356:Homeobox                                            | 5.835274211 | 2.09E-08    |
| GOTERM_BP_FAT   | GO:0006355~regulation of<br>transcription, DNA-dependent      | 2.478144124 | 8.30E-08    |
| INTERPRO        | IPR012287:Homeodomain-<br>related                             | 5.615075184 | 4.67E-08    |
| GOTERM_BP_FAT   | GO:0051252~regulation of RNA<br>metabolic process             | 2.311472484 | 6.36E-07    |
| GOTERM_BP_FAT   | GO:0006350~transcription                                      | 2.533213993 | 1.34E-05    |
| SMART           | SM00389:HOX                                                   | 4.216142271 | 1.80E-06    |
| SP_PIR_KEYWORDS | DNA binding                                                   | 4.77607233  | 2.90E-06    |
| GOTERM_MF_FAT   | GO:0003702~RNA polymerase<br>II transcription factor activity | 2.651248715 | 0.001801188 |

Cluster 2

| Category      | Term                                             | Fold Enrichment | Bonferroni |
|---------------|--------------------------------------------------|-----------------|------------|
| GOTERM_BP_FAT | GO:0048569~post-embryonic<br>organ development   | 3.829859101     | 1.63E-11   |
| GOTERM_BP_FAT | GO:0048563~post-embryonic<br>organ morphogenesis | 3.827162017     | 7.53E-11   |
| GOTERM_BP_FAT | GO:0007560~imaginal disc<br>morphogenesis        | 3.827162017     | 7.53E-11   |
| GOTERM_BP_FAT | GO:0007444~imaginal disc<br>development          | 3.128957702     | 6.67E-10   |
| GOTERM_BP_FAT | GO:0007552~metamorphosis                         | 3.142177218     | 1.92E-08   |
| GOTERM_BP_FAT | GO:0009886~post-embryonic                        | 3.150682954     | 3.15E-08   |

|               |                                                          |             |          |
|---------------|----------------------------------------------------------|-------------|----------|
|               | morphogenesis                                            |             |          |
| GOTERM_BP_FAT | GO:0009791~post-embryonic development                    | 2.853862749 | 6.22E-08 |
| GOTERM_BP_FAT | GO:0048707~instar larval or pupal morphogenesis          | 3.13231704  | 6.82E-08 |
| GOTERM_BP_FAT | GO:0002165~instar larval or pupal development            | 2.842158596 | 2.01E-07 |
| GOTERM_BP_FAT | GO:0035114~imaginal disc-derived appendage morphogenesis | 3.490139381 | 1.33E-06 |
| GOTERM_BP_FAT | GO:0035107~appendage morphogenesis                       | 3.446873191 | 1.83E-06 |
| GOTERM_BP_FAT | GO:0048737~imaginal disc-derived appendage development   | 3.432688527 | 2.04E-06 |
| GOTERM_BP_FAT | GO:0048736~appendage development                         | 3.390826472 | 2.79E-06 |
| GOTERM_BP_FAT | GO:0035120~post-embryonic appendage morphogenesis        | 3.311406559 | 3.11E-05 |
| GOTERM_BP_FAT | GO:0035220~wing disc development                         | 2.878527552 | 2.52E-04 |
| GOTERM_BP_FAT | GO:0007476~imaginal disc-derived wing morphogenesis      | 3.130646292 | 5.78E-04 |
| GOTERM_BP_FAT | GO:0007472~wing disc morphogenesis                       | 3.102185871 | 6.92E-04 |

### Cluster 3

| Category      | Term                                 | Fold Enrichment | Bonferroni |
|---------------|--------------------------------------|-----------------|------------|
| GOTERM_BP_FAT | GO:0007423~sensory organ development | 3.452477862     | 5.00E-13   |
| GOTERM_BP_FAT | GO:0001654~eye development           | 3.426108894     | 9.42E-10   |
| GOTERM_BP_FAT | GO:0048749~compound eye development  | 3.5289416       | 1.27E-09   |

|               |                                                            |             |          |
|---------------|------------------------------------------------------------|-------------|----------|
| GOTERM_BP_FAT | GO:0048592~eye morphogenesis                               | 3.382804916 | 4.53E-07 |
| GOTERM_BP_FAT | GO:0001745~compound eye morphogenesis                      | 3.437681529 | 1.04E-06 |
| GOTERM_BP_FAT | GO:0046530~photoreceptor cell differentiation              | 4.344496417 | 3.34E-05 |
| GOTERM_BP_FAT | GO:0001754~eye photoreceptor cell differentiation          | 4.358115528 | 1.64E-04 |
| GOTERM_BP_FAT | GO:0001751~compound eye photoreceptor cell differentiation | 4.326705687 | 4.16E-04 |

Cluster 4

| Category      | Term                                                     | Fold Enrichment | Bonferroni |
|---------------|----------------------------------------------------------|-----------------|------------|
| GOTERM_BP_FAT | GO:0035114~imaginal disc-derived appendage morphogenesis | 3.490139381     | 1.33E-06   |
| GOTERM_BP_FAT | GO:0035107~appendage morphogenesis                       | 3.446873191     | 1.83E-06   |
| GOTERM_BP_FAT | GO:0048737~imaginal disc-derived appendage development   | 3.432688527     | 2.04E-06   |
| GOTERM_BP_FAT | GO:0048736~appendage development                         | 3.390826472     | 2.79E-06   |
| GOTERM_BP_FAT | GO:0035110~leg morphogenesis                             | 8.425690021     | 2.58E-05   |
| GOTERM_BP_FAT | GO:0035120~post-embryonic appendage morphogenesis        | 3.311406559     | 3.11E-05   |
| GOTERM_BP_FAT | GO:0035108~limb morphogenesis                            | 8.215047771     | 3.56E-05   |
| GOTERM_BP_FAT | GO:0060173~limb development                              | 8.215047771     | 3.56E-05   |

## Cluster 5

| Category      | Term                                     | Fold Enrichment | Bonferroni |
|---------------|------------------------------------------|-----------------|------------|
| GOTERM_BP_FAT | GO:0003002~regionalization               | 2.616789192     | 3.10E-06   |
| GOTERM_BP_FAT | GO:0007389~pattern specification process | 2.475046444     | 1.84E-05   |

## Cluster 6

| Category      | Term                                       | Fold Enrichment | Bonferroni |
|---------------|--------------------------------------------|-----------------|------------|
| GOTERM_BP_FAT | GO:0007498~mesoderm development            | 4.999860013     | 1.07E-04   |
| GOTERM_BP_FAT | GO:0001704~formation of primary germ layer | 9.268259023     | 1.76E-04   |
| GOTERM_BP_FAT | GO:0048598~embryonic morphogenesis         | 3.131672397     | 3.30E-04   |
| GOTERM_BP_FAT | GO:0001707~mesoderm formation              | 9.721950024     | 5.33E-04   |
| GOTERM_BP_FAT | GO:0048332~mesoderm morphogenesis          | 9.361877801     | 7.72E-04   |

## Cluster 7

| Category      | Term                                        | Fold Enrichment | Bonferroni  |
|---------------|---------------------------------------------|-----------------|-------------|
| GOTERM_BP_FAT | GO:0030182~neuron differentiation           | 3.090106365     | 1.94E-09    |
| GOTERM_BP_FAT | GO:0006928~cell motion                      | 3.066398663     | 3.80E-06    |
| GOTERM_BP_FAT | GO:0000902~cell morphogenesis               | 2.516269418     | 3.76E-05    |
| GOTERM_BP_FAT | GO:0048666~neuron development               | 2.695249546     | 1.16E-04    |
| GOTERM_BP_FAT | GO:0032989~cellular component morphogenesis | 2.195884465     | 0.001274019 |
| GOTERM_BP_FAT | GO:0000904~cell morphogenesis involved in   | 2.669525551     | 0.001330054 |

differentiation

Cluster 8

| Category      | Term                            | Fold Enrichment | Bonferroni |
|---------------|---------------------------------|-----------------|------------|
| GOTERM_BP_FAT | GO:0048729~tissue morphogenesis | 3.581771062     | 1.77E-07   |

---

**C. Stg 11 high-density genes +/- 3kb from Yan bound region**

---

Cluster 1

---

| Category      | Term                                            | Fold Enrichment | Bonferroni |
|---------------|-------------------------------------------------|-----------------|------------|
| GOTERM_BP_FAT | GO:0007389~pattern specification process        | 4.152904186     | 3.68E-37   |
| GOTERM_BP_FAT | GO:0007444~imaginal disc development            | 4.438839426     | 2.92E-36   |
| GOTERM_BP_FAT | GO:0003002~regionalization                      | 4.108761851     | 6.33E-34   |
| GOTERM_BP_FAT | GO:0048569~post-embryonic organ development     | 4.987641391     | 2.90E-32   |
| GOTERM_BP_FAT | GO:0009791~post-embryonic development           | 3.918861093     | 1.06E-28   |
| GOTERM_BP_FAT | GO:0048563~post-embryonic organ morphogenesis   | 4.700793471     | 8.08E-27   |
| GOTERM_BP_FAT | GO:0007560~imaginal disc morphogenesis          | 4.700793471     | 8.08E-27   |
| GOTERM_BP_FAT | GO:0009886~post-embryonic morphogenesis         | 4.19640083      | 1.55E-26   |
| GOTERM_BP_FAT | GO:0048707~instar larval or pupal morphogenesis | 4.216257852     | 2.66E-26   |
| GOTERM_BP_FAT | GO:0007552~metamorphosis                        | 4.041551035     | 5.66E-25   |
| GOTERM_BP_FAT | GO:0048736~appendage development                | 4.832199993     | 3.60E-24   |
| GOTERM_BP_FAT | GO:0002165~instar larval or pupal development   | 3.718855423     | 4.16E-24   |
| GOTERM_BP_FAT | GO:0035220~wing disc                            | 4.490652213     | 7.74E-24   |

|               |                                                          |             |          |
|---------------|----------------------------------------------------------|-------------|----------|
|               | development                                              |             |          |
| GOTERM_BP_FAT | GO:0035107~appendage morphogenesis                       | 4.836500743 | 9.22E-24 |
| GOTERM_BP_FAT | GO:0048737~imaginal disc-derived appendage development   | 4.816597447 | 1.18E-23 |
| GOTERM_BP_FAT | GO:0035114~imaginal disc-derived appendage morphogenesis | 4.820691051 | 3.03E-23 |
| GOTERM_BP_FAT | GO:0035120~post-embryonic appendage morphogenesis        | 4.871480893 | 1.19E-22 |
| GOTERM_BP_FAT | GO:0007476~imaginal disc-derived wing morphogenesis      | 4.78172959  | 1.71E-20 |
| GOTERM_BP_FAT | GO:0007472~wing disc morphogenesis                       | 4.738259321 | 2.79E-20 |

#### Cluster 2

| Category        | Term                                                  | Fold Enrichment | Bonferroni |
|-----------------|-------------------------------------------------------|-----------------|------------|
| SP_PIR_KEYWORDS | developmental protein                                 | 4.994181682     | 1.37E-50   |
| SP_PIR_KEYWORDS | dna-binding                                           | 4.627001102     | 3.15E-32   |
| GOTERM_MF_FAT   | GO:0030528~transcription regulator activity           | 3.194881365     | 7.20E-28   |
| GOTERM_BP_FAT   | GO:0045449~regulation of transcription                | 2.838190595     | 1.33E-25   |
| GOTERM_MF_FAT   | GO:0003677~DNA binding                                | 2.812705367     | 6.12E-25   |
| GOTERM_MF_FAT   | GO:0003700~transcription factor activity              | 3.950923113     | 1.77E-24   |
| GOTERM_BP_FAT   | GO:0006355~regulation of transcription, DNA-dependent | 3.107767838     | 8.59E-24   |
| GOTERM_BP_FAT   | GO:0051252~regulation of RNA metabolic process        | 2.886162201     | 6.87E-22   |
| SP_PIR_KEYWORDS | nucleus                                               | 2.699709203     | 2.60E-19   |
| SP_PIR_KEYWORDS | transcription regulation                              | 3.739262518     | 3.52E-18   |

|                 |                                                               |             |          |
|-----------------|---------------------------------------------------------------|-------------|----------|
| GOTERM_MF_FAT   | GO:0003702~RNA polymerase<br>II transcription factor activity | 4.087725504 | 2.02E-16 |
| SP_PIR_KEYWORDS | Transcription                                                 | 3.459012448 | 3.00E-15 |
| GOTERM_BP_FAT   | GO:0006350~transcription                                      | 2.629649709 | 7.04E-10 |

Cluster 3

| Category      | Term                                                                   | Fold Enrichment | Bonferroni |
|---------------|------------------------------------------------------------------------|-----------------|------------|
| GOTERM_BP_FAT | GO:0000902~cell<br>morphogenesis                                       | 3.84793148      | 4.80E-28   |
| GOTERM_BP_FAT | GO:0030182~neuron<br>differentiation                                   | 3.979544353     | 8.89E-28   |
| GOTERM_BP_FAT | GO:0048666~neuron<br>development                                       | 4.163554629     | 1.59E-25   |
| GOTERM_BP_FAT | GO:0032989~cellular<br>component morphogenesis                         | 3.424590324     | 3.18E-25   |
| GOTERM_BP_FAT | GO:0006928~cell motion                                                 | 4.257210848     | 3.91E-23   |
| GOTERM_BP_FAT | GO:0048812~neuron projection<br>morphogenesis                          | 4.348200187     | 1.47E-22   |
| GOTERM_BP_FAT | GO:0031175~neuron projection<br>development                            | 4.333049664     | 1.83E-22   |
| GOTERM_BP_FAT | GO:0000904~cell<br>morphogenesis involved in<br>differentiation        | 4.164598257     | 8.93E-22   |
| GOTERM_BP_FAT | GO:0030030~cell projection<br>organization                             | 3.807916167     | 8.93E-22   |
| GOTERM_BP_FAT | GO:0048667~cell<br>morphogenesis involved in<br>neuron differentiation | 4.254504288     | 1.36E-21   |
| GOTERM_BP_FAT | GO:0048858~cell projection<br>morphogenesis                            | 4.000504032     | 4.66E-21   |
| GOTERM_BP_FAT | GO:0032990~cell part<br>morphogenesis                                  | 3.867556768     | 3.72E-20   |
| GOTERM_BP_FAT | GO:0007409~axonogenesis                                                | 4.895277661     | 2.54E-19   |



|               |                          |             |          |
|---------------|--------------------------|-------------|----------|
| GOTERM_BP_FAT | GO:0007411~axon guidance | 5.109887503 | 1.99E-13 |
|---------------|--------------------------|-------------|----------|

Cluster 4

| Category      | Term                                                             | Fold Enrichment | Bonferroni |
|---------------|------------------------------------------------------------------|-----------------|------------|
| GOTERM_BP_FAT | GO:0048729~tissue morphogenesis                                  | 4.738595869     | 3.18E-23   |
| GOTERM_BP_FAT | GO:0002009~morphogenesis of an epithelium                        | 4.795524834     | 2.09E-21   |
| GOTERM_BP_FAT | GO:0060429~epithelium development                                | 4.591459947     | 2.30E-20   |
| GOTERM_BP_FAT | GO:0048598~embryonic morphogenesis                               | 4.612464826     | 1.17E-19   |
| GOTERM_BP_FAT | GO:0001700~embryonic development via the syncytial blastoderm    | 4.101985443     | 7.66E-14   |
| GOTERM_BP_FAT | GO:0009792~embryonic development ending in birth or egg hatching | 3.918861093     | 7.95E-13   |
| GOTERM_BP_FAT | GO:0016331~morphogenesis of embryonic epithelium                 | 5.181605223     | 5.17E-12   |
| GOTERM_BP_FAT | GO:0007391~dorsal closure                                        | 5.582658259     | 1.02E-10   |

Cluster 5

| Category      | Term                                    | Fold Enrichment | Bonferroni |
|---------------|-----------------------------------------|-----------------|------------|
| GOTERM_BP_FAT | GO:0048732~gland development            | 5.497625173     | 5.39E-20   |
| GOTERM_BP_FAT | GO:0007431~salivary gland development   | 5.262739117     | 5.37E-15   |
| GOTERM_BP_FAT | GO:0035272~exocrine system development  | 5.262739117     | 5.37E-15   |
| GOTERM_BP_FAT | GO:0007435~salivary gland morphogenesis | 4.170951572     | 2.58E-06   |
| GOTERM_BP_FAT | GO:0022612~gland                        | 4.170951572     | 2.58E-06   |

morphogenesis

Cluster 6

| Category      | Term                                                       | Fold Enrichment | Bonferroni |
|---------------|------------------------------------------------------------|-----------------|------------|
| GOTERM_BP_FAT | GO:0007447~imaginal disc pattern formation                 | 7.62000768      | 1.18E-21   |
| GOTERM_BP_FAT | GO:0009953~dorsal/ventral pattern formation                | 4.876804916     | 5.17E-12   |
| GOTERM_BP_FAT | GO:0035222~wing disc pattern formation                     | 6.992477636     | 7.15E-12   |
| GOTERM_BP_FAT | GO:0007450~dorsal/ventral pattern formation, imaginal disc | 7.05853343      | 1.14E-09   |
| GOTERM_BP_FAT | GO:0048190~wing disc dorsal/ventral pattern formation      | 6.583686636     | 8.18E-07   |

Cluster 7

| Category      | Term                                                                        | Fold Enrichment | Bonferroni |
|---------------|-----------------------------------------------------------------------------|-----------------|------------|
| GOTERM_BP_FAT | GO:0007167~enzyme linked receptor protein signaling pathway                 | 4.918846337     | 1.99E-13   |
| GOTERM_BP_FAT | GO:0007166~cell surface receptor linked signal transduction                 | 2.446168071     | 1.23E-11   |
| GOTERM_BP_FAT | GO:0007169~transmembrane receptor protein tyrosine kinase signaling pathway | 5.36895954      | 1.31E-11   |
| GOTERM_BP_FAT | GO:0007173~epidermal growth factor receptor signaling pathway               | 8.636008705     | 2.24E-08   |

Cluster 8

| Category      | Term                            | Fold Enrichment | Bonferroni |
|---------------|---------------------------------|-----------------|------------|
| GOTERM_BP_FAT | GO:0006928~cell motion          | 4.257210848     | 3.91E-23   |
| GOTERM_BP_FAT | GO:0016477~cell migration       | 4.389124424     | 9.94E-13   |
| GOTERM_BP_FAT | GO:0048870~cell motility        | 4.107469381     | 1.11E-11   |
| GOTERM_BP_FAT | GO:0051674~localization of cell | 4.012167309     | 1.21E-11   |

#### Cluster 9

| Category      | Term                                                        | Fold Enrichment | Bonferroni |
|---------------|-------------------------------------------------------------|-----------------|------------|
| GOTERM_BP_FAT | GO:0007449~proximal/distal pattern formation, imaginal disc | 14.80458635     | 1.99E-13   |
| GOTERM_BP_FAT | GO:0009954~proximal/distal pattern formation                | 13.51723102     | 1.39E-12   |
| GOTERM_BP_FAT | GO:0035218~leg disc development                             | 8.247537725     | 6.16E-12   |
| GOTERM_BP_FAT | GO:0035223~leg disc pattern formation                       | 14.85901498     | 1.60E-09   |
| GOTERM_BP_FAT | GO:0007479~leg disc proximal/distal pattern formation       | 14.85901498     | 1.60E-09   |
| GOTERM_BP_FAT | GO:0007474~imaginal disc-derived wing vein specification    | 8.001008065     | 7.62E-06   |

#### Cluster 10

| Category      | Term                                 | Fold Enrichment | Bonferroni |
|---------------|--------------------------------------|-----------------|------------|
| GOTERM_BP_FAT | GO:0007423~sensory organ development | 3.523788918     | 1.62E-20   |
| GOTERM_BP_FAT | GO:0001654~eye development           | 3.470316751     | 2.86E-15   |
| GOTERM_BP_FAT | GO:0048749~compound eye development  | 3.384470944     | 7.95E-13   |
| GOTERM_BP_FAT | GO:0048592~eye morphogenesis         | 3.127319137     | 1.43E-08   |

|               |                                                            |             |          |
|---------------|------------------------------------------------------------|-------------|----------|
| GOTERM_BP_FAT | GO:0001745~compound eye morphogenesis                      | 3.072387097 | 2.46E-07 |
| GOTERM_BP_FAT | GO:0046530~photoreceptor cell differentiation              | 4.143379176 | 2.76E-07 |
| GOTERM_BP_FAT | GO:0001751~compound eye photoreceptor cell differentiation | 3.954166148 | 3.74E-05 |
| GOTERM_BP_FAT | GO:0001754~eye photoreceptor cell differentiation          | 3.783727952 | 8.95E-05 |

#### Cluster 11

| Category        | Term                                     | Fold Enrichment | Bonferroni |
|-----------------|------------------------------------------|-----------------|------------|
| SP_PIR_KEYWORDS | Homeobox                                 | 6.113890333     | 2.26E-12   |
| INTERPRO        | IPR001356:Homeobox                       | 5.575501914     | 1.99E-10   |
| INTERPRO        | IPR017970:Homeobox, conserved site       | 5.653509673     | 4.02E-10   |
| GOTERM_MF_FAT   | GO:0043565~sequence-specific DNA binding | 3.55256917      | 5.60E-10   |
| INTERPRO        | IPR012287:Homeodomain-related            | 5.1734947       | 3.76E-09   |
| UP_SEQ_FEATURE  | DNA-binding region:Homeobox              | 5.542986425     | 6.95E-08   |
| SMART           | SM00389:HOX                              | 4.138235294     | 3.22E-08   |

#### Cluster 12

| Category      | Term                                        | Fold Enrichment | Bonferroni |
|---------------|---------------------------------------------|-----------------|------------|
| GOTERM_BP_FAT | GO:0048645~organ formation                  | 10.05841014     | 1.99E-13   |
| GOTERM_BP_FAT | GO:0010160~formation of organ boundary      | 10.1065365      | 7.95E-13   |
| GOTERM_BP_FAT | GO:0048859~formation of anatomical boundary | 9.144009217     | 2.19E-12   |
| GOTERM_BP_FAT | GO:0008052~sensory organ                    | 9.541574835     | 1.50E-05   |

|               |                                                     |             |          |
|---------------|-----------------------------------------------------|-------------|----------|
|               | boundary specification                              |             |          |
|               | GO:0016360~sensory organ                            |             |          |
| GOTERM_BP_FAT | precursor cell fate<br>determination                | 9.62527286  | 4.00E-04 |
| GOTERM_BP_FAT | GO:0007432~salivary gland<br>boundary specification | 10.97281106 | 6.04E-04 |

Cluster 13

| Category      | Term                                                                    | Fold Enrichment | Bonferroni |
|---------------|-------------------------------------------------------------------------|-----------------|------------|
| GOTERM_BP_FAT | GO:0060541~respiratory<br>system development                            | 5.020240354     | 4.43E-15   |
| GOTERM_BP_FAT | GO:0007424~open tracheal<br>system development                          | 5.020240354     | 4.43E-15   |
| GOTERM_BP_FAT | GO:0035295~tube<br>development                                          | 5.541823768     | 4.25E-11   |
| GOTERM_BP_FAT | GO:0035239~tube<br>morphogenesis                                        | 5.442862629     | 1.41E-08   |
| GOTERM_BP_FAT | GO:0001763~morphogenesis of<br>a branching structure                    | 7.402293175     | 3.76E-07   |
| GOTERM_BP_FAT | GO:0048754~branching<br>morphogenesis of a tube                         | 6.564929694     | 1.25E-04   |
| GOTERM_BP_FAT | GO:0060446~branching<br>involved in open tracheal<br>system development | 6.564929694     | 1.25E-04   |
| GOTERM_BP_FAT | GO:0060562~epithelial tube<br>morphogenesis                             | 6.096006144     | 3.39E-04   |

Cluster 14

| Category      | Term                                     | Fold Enrichment | Bonferroni |
|---------------|------------------------------------------|-----------------|------------|
| GOTERM_BP_FAT | GO:0014016~neuroblast<br>differentiation | 10.45029625     | 3.10E-09   |
| GOTERM_BP_FAT | GO:0014017~neuroblast fate<br>commitment | 10.16001024     | 3.15E-08   |

|               |                                          |             |          |
|---------------|------------------------------------------|-------------|----------|
| GOTERM_BP_FAT | GO:0007400~neuroblast fate determination | 9.509769585 | 2.91E-06 |
|---------------|------------------------------------------|-------------|----------|

Cluster 15

| Category      | Term                           | Fold Enrichment | Bonferroni |
|---------------|--------------------------------|-----------------|------------|
| GOTERM_BP_FAT | GO:0007155~cell adhesion       | 3.783727952     | 1.68E-08   |
| GOTERM_BP_FAT | GO:0022610~biological adhesion | 3.501960977     | 1.66E-07   |
| GOTERM_BP_FAT | GO:0016337~cell-cell adhesion  | 6.199328282     | 2.23E-07   |

Cluster 16

| Category      | Term                                                 | Fold Enrichment | Bonferroni |
|---------------|------------------------------------------------------|-----------------|------------|
| GOTERM_BP_FAT | GO:0035215~genital disc development                  | 12.40972679     | 1.99E-13   |
| GOTERM_BP_FAT | GO:0035225~determination of genital disc primordium  | 18.28801843     | 6.74E-08   |
| GOTERM_BP_FAT | GO:0007445~determination of imaginal disc primordium | 18.28801843     | 6.74E-08   |

Cluster 17

| Category      | Term                                          | Fold Enrichment | Bonferroni |
|---------------|-----------------------------------------------|-----------------|------------|
| GOTERM_BP_FAT | GO:0030707~ovarian follicle cell development  | 3.585885967     | 5.54E-09   |
| GOTERM_BP_FAT | GO:0003006~reproductive developmental process | 2.421536038     | 2.11E-08   |
| GOTERM_BP_FAT | GO:0048610~reproductive cellular process      | 2.304290323     | 8.21E-07   |
| GOTERM_BP_FAT | GO:0007292~female gamete generation           | 2.210639591     | 1.66E-06   |
| GOTERM_BP_FAT | GO:0007276~gamete generation                  | 2.020634205     | 1.78E-06   |
| GOTERM_BP_FAT | GO:0048477~oogenesis                          | 2.205419663     | 2.54E-06   |

|               |                                                             |             |          |
|---------------|-------------------------------------------------------------|-------------|----------|
| GOTERM_BP_FAT | GO:0019953~sexual reproduction                              | 1.990532619 | 2.75E-06 |
| GOTERM_BP_FAT | GO:0048609~reproductive process in a multicellular organism | 1.880516034 | 3.75E-05 |
| GOTERM_BP_FAT | GO:0032504~multicellular organism reproduction              | 1.880516034 | 3.75E-05 |

Cluster 18

| Category      | Term                                     | Fold Enrichment | Bonferroni |
|---------------|------------------------------------------|-----------------|------------|
| GOTERM_BP_FAT | GO:0048565~gut development               | 6.513540812     | 4.89E-11   |
| GOTERM_BP_FAT | GO:0035239~tube morphogenesis            | 5.442862629     | 1.41E-08   |
| GOTERM_BP_FAT | GO:0007439~ectodermal gut development    | 7.156181126     | 1.78E-07   |
| GOTERM_BP_FAT | GO:0048567~ectodermal gut morphogenesis  | 7.156181126     | 1.78E-07   |
| GOTERM_BP_FAT | GO:0048547~gut morphogenesis             | 7.003921953     | 2.65E-07   |
| GOTERM_BP_FAT | GO:0048546~digestive tract morphogenesis | 6.858006912     | 3.90E-07   |
| GOTERM_BP_FAT | GO:0055123~digestive system development  | 6.858006912     | 3.90E-07   |
| GOTERM_BP_FAT | GO:0007442~hindgut morphogenesis         | 6.531435155     | 3.89E-05   |

Cluster 19

| Category      | Term                                                                   | Fold Enrichment | Bonferroni |
|---------------|------------------------------------------------------------------------|-----------------|------------|
| GOTERM_BP_FAT | GO:0006357~regulation of transcription from RNA polymerase II promoter | 4.191004224     | 9.94E-13   |
| GOTERM_MF_FAT | GO:0016564~transcription repressor activity                            | 5.53294412      | 4.83E-12   |

|               |                                                                                                                  |             |          |
|---------------|------------------------------------------------------------------------------------------------------------------|-------------|----------|
| GOTERM_BP_FAT | GO:0010558~negative<br>regulation of macromolecule<br>biosynthetic process                                       | 3.048003072 | 5.47E-07 |
| GOTERM_BP_FAT | GO:0031327~negative<br>regulation of cellular<br>biosynthetic process                                            | 3.011280144 | 7.97E-07 |
| GOTERM_BP_FAT | GO:0009890~negative<br>regulation of biosynthetic<br>process                                                     | 3.011280144 | 7.97E-07 |
| GOTERM_BP_FAT | GO:0000122~negative<br>regulation of transcription from<br>RNA polymerase II promoter                            | 5.696268037 | 3.44E-06 |
| GOTERM_BP_FAT | GO:0010605~negative<br>regulation of macromolecule<br>metabolic process                                          | 2.653781855 | 3.84E-06 |
| GOTERM_BP_FAT | GO:0016481~negative<br>regulation of transcription                                                               | 3.003829115 | 3.49E-05 |
| GOTERM_BP_FAT | GO:0051172~negative<br>regulation of nitrogen<br>compound metabolic process                                      | 2.788307743 | 2.21E-04 |
| GOTERM_BP_FAT | GO:0045934~negative<br>regulation of nucleobase,<br>nucleoside, nucleotide and<br>nucleic acid metabolic process | 2.788307743 | 2.21E-04 |
| GOTERM_BP_FAT | GO:0010629~negative<br>regulation of gene expression                                                             | 2.571752592 | 6.62E-04 |

Cluster 20

| Category      | Term                                                 | Fold Enrichment | Bonferroni |
|---------------|------------------------------------------------------|-----------------|------------|
| GOTERM_BP_FAT | GO:0010628~positive<br>regulation of gene expression | 4.532927646     | 2.82E-08   |
| GOTERM_BP_FAT | GO:0045941~positive<br>regulation of transcription   | 4.414349277     | 1.31E-07   |
| GOTERM_BP_FAT | GO:0051173~positive<br>regulation of nitrogen        | 4.23193815      | 3.67E-07   |



|               |                                                                                           |             |             |
|---------------|-------------------------------------------------------------------------------------------|-------------|-------------|
|               | compound metabolic process                                                                |             |             |
|               | GO:0045935~positive                                                                       |             |             |
| GOTERM_BP_FAT | regulation of nucleobase,<br>nucleoside, nucleotide and<br>nucleic acid metabolic process | 4.23193815  | 3.67E-07    |
|               | GO:0010557~positive                                                                       |             |             |
| GOTERM_BP_FAT | regulation of macromolecule<br>biosynthetic process                                       | 3.969492373 | 1.70E-06    |
|               | GO:0010604~positive                                                                       |             |             |
| GOTERM_BP_FAT | regulation of macromolecule<br>metabolic process                                          | 3.734877004 | 3.47E-06    |
|               | GO:0031328~positive                                                                       |             |             |
| GOTERM_BP_FAT | regulation of cellular<br>biosynthetic process                                            | 3.466356435 | 1.99E-05    |
|               | GO:0009891~positive                                                                       |             |             |
| GOTERM_BP_FAT | regulation of biosynthetic<br>process                                                     | 3.466356435 | 1.99E-05    |
|               | GO:0045893~positive                                                                       |             |             |
| GOTERM_BP_FAT | regulation of transcription,<br>DNA-dependent                                             | 3.948549434 | 0.001607775 |

#### Cluster 21

| Category        | Term                                  | Fold Enrichment | Bonferroni |
|-----------------|---------------------------------------|-----------------|------------|
| SP_PIR_KEYWORDS | neurogenesis                          | 8.831174925     | 3.51E-17   |
| SP_PIR_KEYWORDS | differentiation                       | 5.0703125       | 1.76E-13   |
|                 | GO:0016566~specific                   |                 |            |
| GOTERM_MF_FAT   | transcriptional repressor<br>activity | 9.186868687     | 2.32E-09   |
| UP_SEQ_FEATURE  | DNA-binding region:Basic motif        | 5.093555094     | 6.84E-04   |
| UP_SEQ_FEATURE  | domain:Helix-loop-helix motif         | 5.46875         | 8.10E-04   |

#### Cluster 22

| Category | Term | Fold Enrichment | Bonferroni |
|----------|------|-----------------|------------|
|----------|------|-----------------|------------|

|               |                                                          |             |          |
|---------------|----------------------------------------------------------|-------------|----------|
| GOTERM_BP_FAT | GO:0007163~establishment or maintenance of cell polarity | 4.362279626 | 9.42E-07 |
| GOTERM_BP_FAT | GO:0001736~establishment of planar polarity              | 5.096660875 | 1.75E-04 |
| GOTERM_BP_FAT | GO:0007164~establishment of tissue polarity              | 5.014456667 | 2.24E-04 |
| GOTERM_BP_FAT | GO:0001738~morphogenesis of a polarized epithelium       | 4.702633311 | 2.37E-04 |

#### Cluster 23

| Category      | Term                                | Fold Enrichment | Bonferroni |
|---------------|-------------------------------------|-----------------|------------|
| GOTERM_BP_FAT | GO:0001667~ameboidal cell migration | 6.858006912     | 9.14E-04   |

#### Cluster 24

| Category      | Term                                       | Fold Enrichment | Bonferroni |
|---------------|--------------------------------------------|-----------------|------------|
| GOTERM_BP_FAT | GO:0009880~embryonic pattern specification | 3.562600993     | 2.34E-10   |
| GOTERM_BP_FAT | GO:0035282~segmentation                    | 3.305911024     | 1.04E-09   |
| GOTERM_BP_FAT | GO:0007350~blastoderm segmentation         | 3.439489705     | 1.13E-08   |

#### Cluster 25

| Category      | Term                                    | Fold Enrichment | Bonferroni |
|---------------|-----------------------------------------|-----------------|------------|
| GOTERM_BP_FAT | GO:0035051~cardiac cell differentiation | 10.97281106     | 2.16E-06   |

#### Cluster 26

| Category      | Term                                          | Fold Enrichment | Bonferroni |
|---------------|-----------------------------------------------|-----------------|------------|
| GOTERM_BP_FAT | GO:0046530~photoreceptor cell differentiation | 4.143379176     | 2.76E-07   |
| GOTERM_BP_FAT | GO:0001751~compound eye                       | 3.954166148     | 3.74E-05   |

|               |                                              |             |             |
|---------------|----------------------------------------------|-------------|-------------|
|               | photoreceptor cell<br>differentiation        |             |             |
|               | GO:0001754~eye                               |             |             |
| GOTERM_BP_FAT | photoreceptor cell<br>differentiation        | 3.783727952 | 8.95E-05    |
| GOTERM_BP_FAT | GO:0042461~photoreceptor<br>cell development | 4.64457611  | 0.001722476 |

#### Cluster 27

| Category      | Term                                | Fold Enrichment | Bonferroni |
|---------------|-------------------------------------|-----------------|------------|
| GOTERM_BP_FAT | GO:0007365~periodic<br>partitioning | 5.757339136     | 2.59E-05   |

#### Cluster 28

| Category      | Term                                                                   | Fold Enrichment | Bonferroni |
|---------------|------------------------------------------------------------------------|-----------------|------------|
| GOTERM_BP_FAT | GO:0035152~regulation of tube<br>architecture, open tracheal<br>system | 6.737691002     | 8.78E-05   |
| GOTERM_BP_FAT | GO:0048871~multicellular<br>organismal homeostasis                     | 10.7576579      | 1.16E-04   |
| GOTERM_BP_FAT | GO:0001894~tissue<br>homeostasis                                       | 10.7576579      | 1.16E-04   |

#### Cluster 29

| Category      | Term                                 | Fold Enrichment | Bonferroni  |
|---------------|--------------------------------------|-----------------|-------------|
| GOTERM_BP_FAT | GO:0035218~leg disc<br>development   | 8.247537725     | 6.16E-12    |
| GOTERM_BP_FAT | GO:0007478~leg disc<br>morphogenesis | 7.079232942     | 6.30E-04    |
| GOTERM_BP_FAT | GO:0035110~leg<br>morphogenesis      | 6.096006144     | 0.001085789 |

## Cluster 30

| Category      | Term                                             | Fold Enrichment | Bonferroni |
|---------------|--------------------------------------------------|-----------------|------------|
| GOTERM_BP_FAT | GO:0010453~regulation of cell fate commitment    | 10.05841014     | 4.26E-05   |
| GOTERM_BP_FAT | GO:0042659~regulation of cell fate specification | 10.05841014     | 4.26E-05   |

## Cluster 31

| Category      | Term                                                       | Fold Enrichment | Bonferroni |
|---------------|------------------------------------------------------------|-----------------|------------|
| GOTERM_BP_FAT | GO:0046530~photoreceptor cell differentiation              | 4.143379176     | 2.76E-07   |
| GOTERM_BP_FAT | GO:0001751~compound eye photoreceptor cell differentiation | 3.954166148     | 3.74E-05   |
| GOTERM_BP_FAT | GO:0001754~eye photoreceptor cell differentiation          | 3.783727952     | 8.95E-05   |

## Cluster 32

| Category      | Term                                   | Fold Enrichment | Bonferroni |
|---------------|----------------------------------------|-----------------|------------|
| GOTERM_BP_FAT | GO:0042692~muscle cell differentiation | 4.448436916     | 5.64E-04   |

## Cluster 33

| Category      | Term                    | Fold Enrichment | Bonferroni |
|---------------|-------------------------|-----------------|------------|
| GOTERM_BP_FAT | GO:0007369~gastrulation | 4.826004864     | 6.21E-05   |

## Cluster 34

| Category      | Term                         | Fold Enrichment | Bonferroni  |
|---------------|------------------------------|-----------------|-------------|
| GOTERM_BP_FAT | GO:0035287~head segmentation | 8.708580206     | 0.001152031 |

## Cluster 35

| Category      | Term                            | Fold Enrichment | Bonferroni |
|---------------|---------------------------------|-----------------|------------|
| GOTERM_BP_FAT | GO:0007498~mesoderm development | 4.823213653     | 5.95E-07   |
| GOTERM_BP_FAT | GO:0007369~gastrulation         | 4.826004864     | 6.21E-05   |

## Cluster 36

| Category        | Term           | Fold Enrichment | Bonferroni |
|-----------------|----------------|-----------------|------------|
| SP_PIR_KEYWORDS | glycoprotein   | 2.520192606     | 8.66E-07   |
| SP_PIR_KEYWORDS | disulfide bond | 2.73036716      | 1.01E-04   |

## Cluster 37

| Category      | Term                                | Fold Enrichment | Bonferroni |
|---------------|-------------------------------------|-----------------|------------|
| GOTERM_BP_FAT | GO:0008356~asymmetric cell division | 5.675591928     | 1.09E-05   |
| GOTERM_BP_FAT | GO:0051301~cell division            | 2.943924919     | 9.64E-05   |

## Cluster 38

| Category      | Term                                   | Fold Enrichment | Bonferroni |
|---------------|----------------------------------------|-----------------|------------|
| GOTERM_BP_FAT | GO:0042692~muscle cell differentiation | 4.448436916     | 5.64E-04   |

## Cluster 39

| Category      | Term                                    | Fold Enrichment | Bonferroni |
|---------------|-----------------------------------------|-----------------|------------|
| GOTERM_BP_FAT | GO:0035051~cardiac cell differentiation | 10.97281106     | 2.16E-06   |

## Cluster 40

| Category | Term | Fold Enrichment | Bonferroni |
|----------|------|-----------------|------------|
|----------|------|-----------------|------------|

|               |                                     |             |          |
|---------------|-------------------------------------|-------------|----------|
| GOTERM_BP_FAT | GO:0010941~regulation of cell death | 3.975656181 | 1.58E-05 |
|---------------|-------------------------------------|-------------|----------|

|               |                                                |             |          |
|---------------|------------------------------------------------|-------------|----------|
| GOTERM_BP_FAT | GO:0043067~regulation of programmed cell death | 3.624652302 | 7.91E-04 |
|---------------|------------------------------------------------|-------------|----------|

Cluster 41

---

| Category        | Term                           | Fold Enrichment | Bonferroni |
|-----------------|--------------------------------|-----------------|------------|
| SP_PIR_KEYWORDS | zinc finger                    | 6.44872814      | 8.66E-06   |
| UP_SEQ_FEATURE  | zinc finger region:C2H2-type 1 | 4.67032967      | 1.18E-04   |
| UP_SEQ_FEATURE  | zinc finger region:C2H2-type 2 | 4.576923077     | 1.62E-04   |
| SP_PIR_KEYWORDS | zinc-finger                    | 2.443944741     | 5.53E-04   |

Cluster 42

---

| Category      | Term                           | Fold Enrichment | Bonferroni |
|---------------|--------------------------------|-----------------|------------|
| GOTERM_BP_FAT | GO:0007548~sex differentiation | 5.181605223     | 1.36E-04   |

Cluster 43

---

| Category      | Term                                    | Fold Enrichment | Bonferroni |
|---------------|-----------------------------------------|-----------------|------------|
| GOTERM_BP_FAT | GO:0022612~gland morphogenesis          | 4.170951572     | 2.58E-06   |
| GOTERM_BP_FAT | GO:0007435~salivary gland morphogenesis | 4.170951572     | 2.58E-06   |

---
