# Supplementary material
Source: PubMed Central journal article supplement (PMC3567750)
Supplement: eaca2028f6b28be0ae456d8342e2ef10_genetics.112.146647-16.pdf [file eaca2028f6b28be0ae456d8342e2ef10_genetics.112.146647-16.pdf]

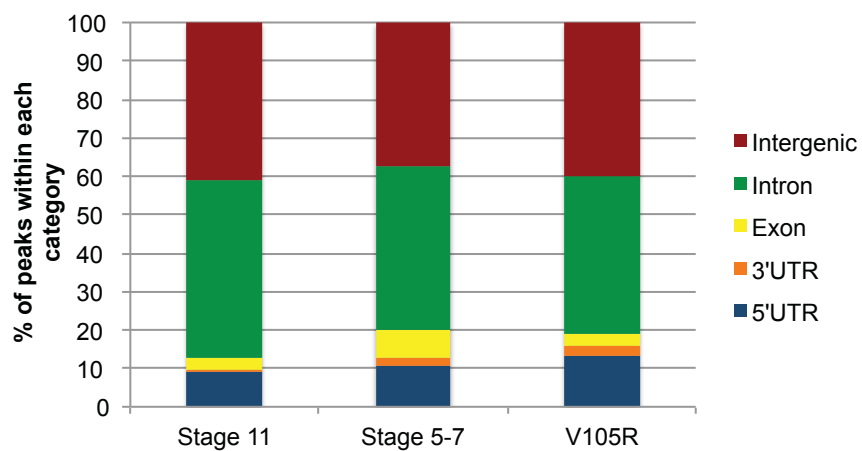

**Figure S1** Yan binds to Introns and Intergenic regions. Distribution of Yan binding regions relative to 5' UTR (blue), 3' UTR (orange), Exons (yellow), Introns (green) and Intergenic regions (red) using Flybase annotation r5.40. If peaks overlapped with more than one annotation, the one with maximum overlap was assigned.

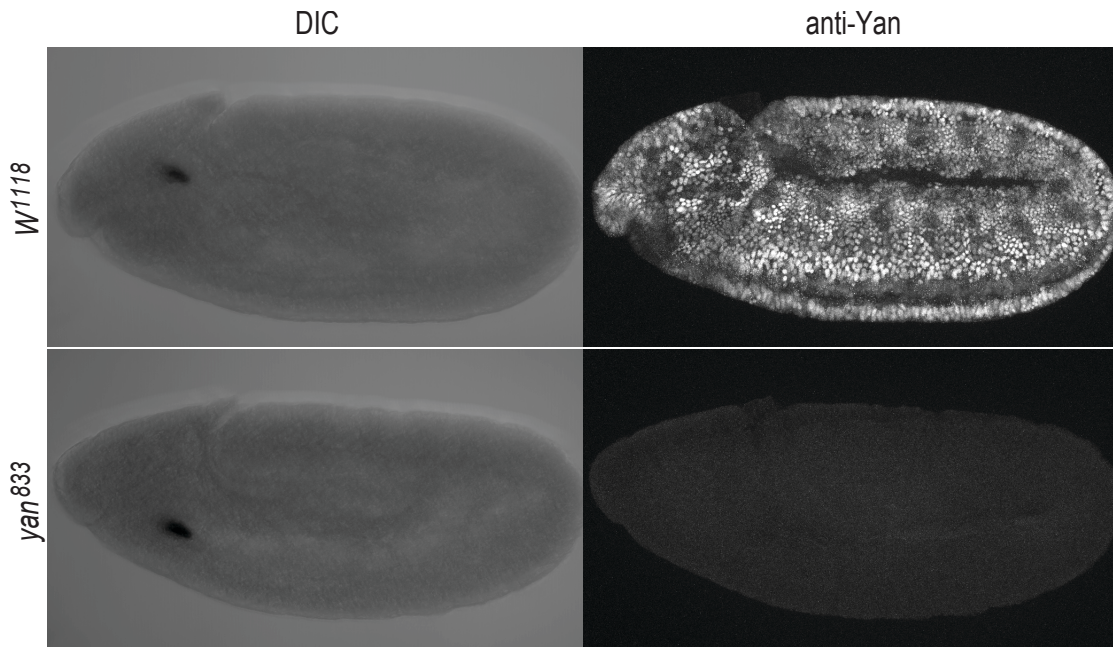

**Figure S2** Specificity of Yan antibody. Embryos were fixed at room temperature for 20 minutes in a 1:1 mixture of n-heptane and 4% formaldehyde solution in PBS with vigorous shaking. The vitelline membrane was removed by replacing the formaldehyde solution with methanol. Embryos were blocked in PNT (PBS, 1% normal goat serum, 0.1% TX100) and stained with guinea pig anti-Yan (1:2000), followed by secondary antibody staining with cy3-conjugated anti-guinea pig antibody (1:2000).

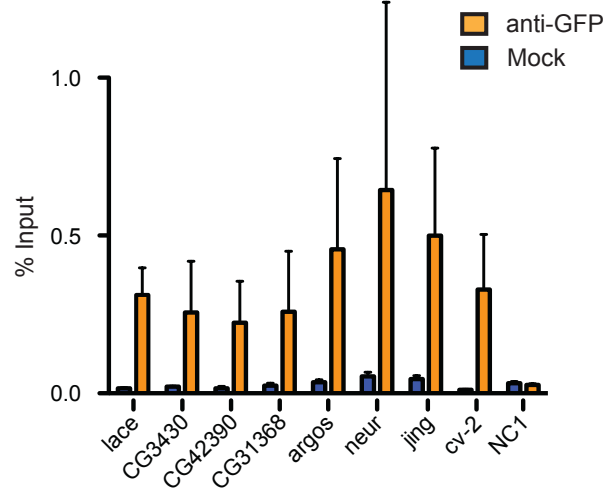

**Figure S3** ChIP patterns following immunoprecipitation of GFP-tagged Yan<sup>WT</sup> with a GFP antibody. Following cross-linking in 1.8% formaldehyde, embryos were washed and homogenized in ChIP lysis buffer as described in Materials & Methods. Following sonication and clarification, the lysate was divided into 1% Input, Mock and IP and either mock treated with no antibody (Mock) or incubated with 1:200 anti-GFP overnight (anti-GFP). Beads were added to each sample and incubated for 4 hours with rocking at 4C. The IPs were then washed and DNA eluted in TE/SDS. Following reverse cross-linking and elution of DNA, samples were analyzed by qPCR at the *lace*, *CG3430*, *CG42390*, *CG31368*, *argos*, *neur*, *jing*, *cv-2* loci as well as at a region where Yan does not bind (NC1).

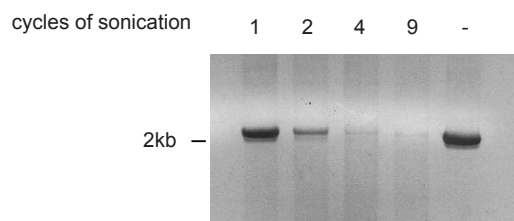

**Figure S4** Validation of sonication efficiency. Embryos were fixed and homogenized in ChIP lysis buffer. Samples were sonicated at 15% amplitude for 0.9s for 0, 1, 2, 4 or 9 cycles. DNA was purified and amplification of a 2kb fragment by PCR using the following primers 5'CGAGAATGCGCAATACAATG 3'GTGCAACTGACGGAGGAAGT was attempted. After 4 sonication cycles, very little product was amplified, and after 9, the number used in our usual ChIP protocol, essentially no amplified product was detected.

**A**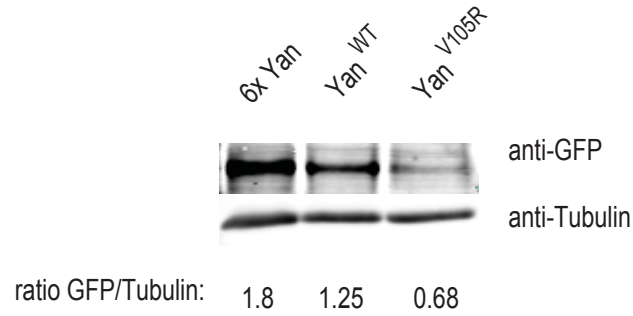**B**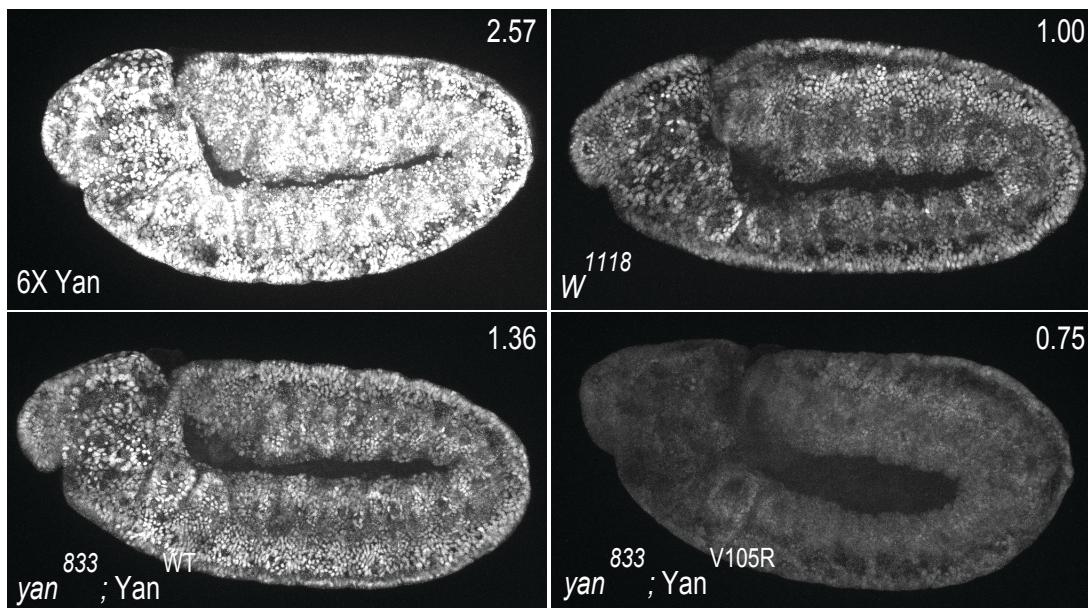

**Figure S5** Yan protein levels in 6X, WT and V105R embryos. A) Following dechoriation and GFP sorting, approximately 100 GFP-negative stage 11 *yan* null; *Yan*<sup>WT</sup> or *Yan*<sup>V105R</sup> embryos or 100 6x embryos were homogenized in 50ml SDS sample buffer (250mM Tris-Cl pH 8, 10% SDS, 50% Glycerol, 5% b-mercaptoethanol, 0.04% bromophenol blue). Samples were passed through a 27G needle 10 times and boiled for 10 minutes prior to running on an 8% acrylamide gel and transfer to PVDF. The blots were probed with anti-GFP (1:1000; Invitrogen) and anti-tubulin (1:1000; Sigma). 6x Yan carries four GFP-tagged *yan* genes while *Yan*<sup>WT</sup> and *Yan*<sup>V105R</sup> each carry two GFP-tagged *yan* genes. B) Embryos were fixed at room temperature for 20 minutes in a 1:1 mixture of n-heptane and 4% formaldehyde solution in PBS with vigorous shaking. The vitelline membrane was removed by replacing the formaldehyde solution with methanol. Embryos were blocked in PNT (PBS, 1% normal goat serum, 0.1% TX100) and stained with guinea pig anti-Yan (1:2000), followed by secondary antibody staining with cy3-conjugated anti-guinea pig antibody (1:2000). 6x Yan carries two endogenous copies of *yan* and four GFP tagged *yan* genes that are all detectable by anti-Yan while *Yan*<sup>WT</sup> and *Yan*<sup>V105R</sup> embryos only carry two GFP-tagged *yan* genes that will yield a protein product. Embryos were fixed, stained and imaged in parallel with identical confocal settings.

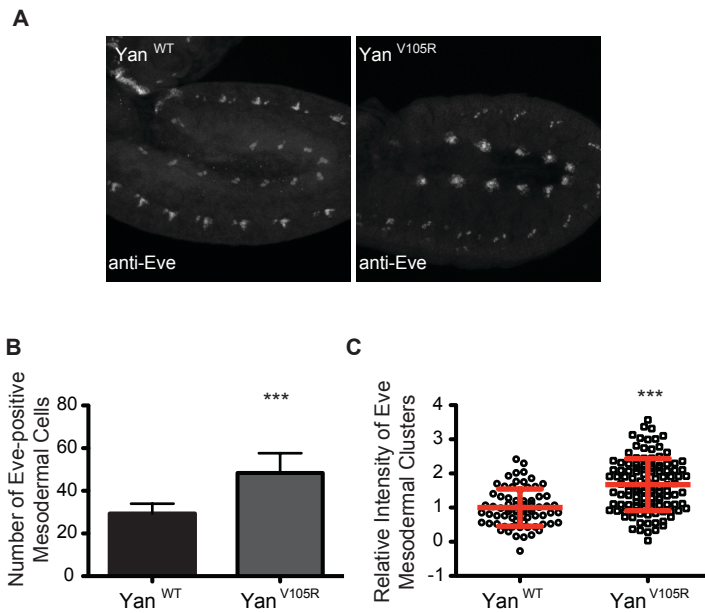

**Figure S6** Yan<sup>V105R</sup> has a reduced ability to repress endogenous *eve* expression. A) Endogenous *eve* expression in mesodermal clusters in either *yan*<sup>-/-</sup>;Yan<sup>V105R</sup> or *yan*<sup>E833/ER433</sup>;Yan<sup>V105R</sup> embryos. B) Quantification of number of Eve-positive cells in the mesodermal clusters in Stage 11 *yan*<sup>E833/ER433</sup>;Yan<sup>WT</sup> or *yan*<sup>E833/ER433</sup>;Yan<sup>V105R</sup> embryos (N=40 embryos; p<0.0001, students t-test) C) Quantification of *eve* expression in the mesodermal clusters reveals an increase in the mean intensity (N=10 embryos; p<0.0001, students t-test) and variation (p<0.0001, Mann Whitney U) in *yan*<sup>E833/ER433</sup>;Yan<sup>V105R</sup> embryos relative to *yan*<sup>E833/ER433</sup>;Yan<sup>WT</sup>.

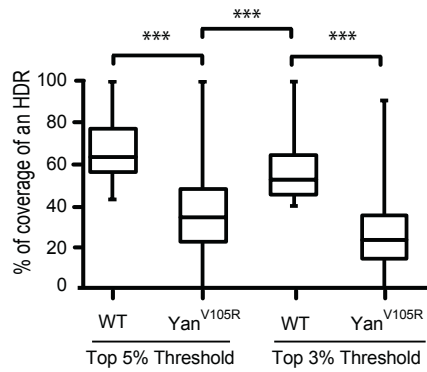

**Figure S7** Quantification of Yan<sup>V105R</sup> coverage of wild-type Yan high-density regions. Quantification of the density of HDRs bound by either Yan<sup>V105R</sup> or wild-type Yan (WT) using a threshold of top 3% or 5% of p-values for peak calling (Yan<sup>WT</sup>-5%:Yan<sup>V105R</sup>-5%, p<0.0001; Yan<sup>WT</sup>-3%:Yan<sup>V105R</sup>-5%, p<0.0001; Yan<sup>WT</sup>-3%:Yan<sup>V105R</sup>-3%, p<0.0001; Friedman test).

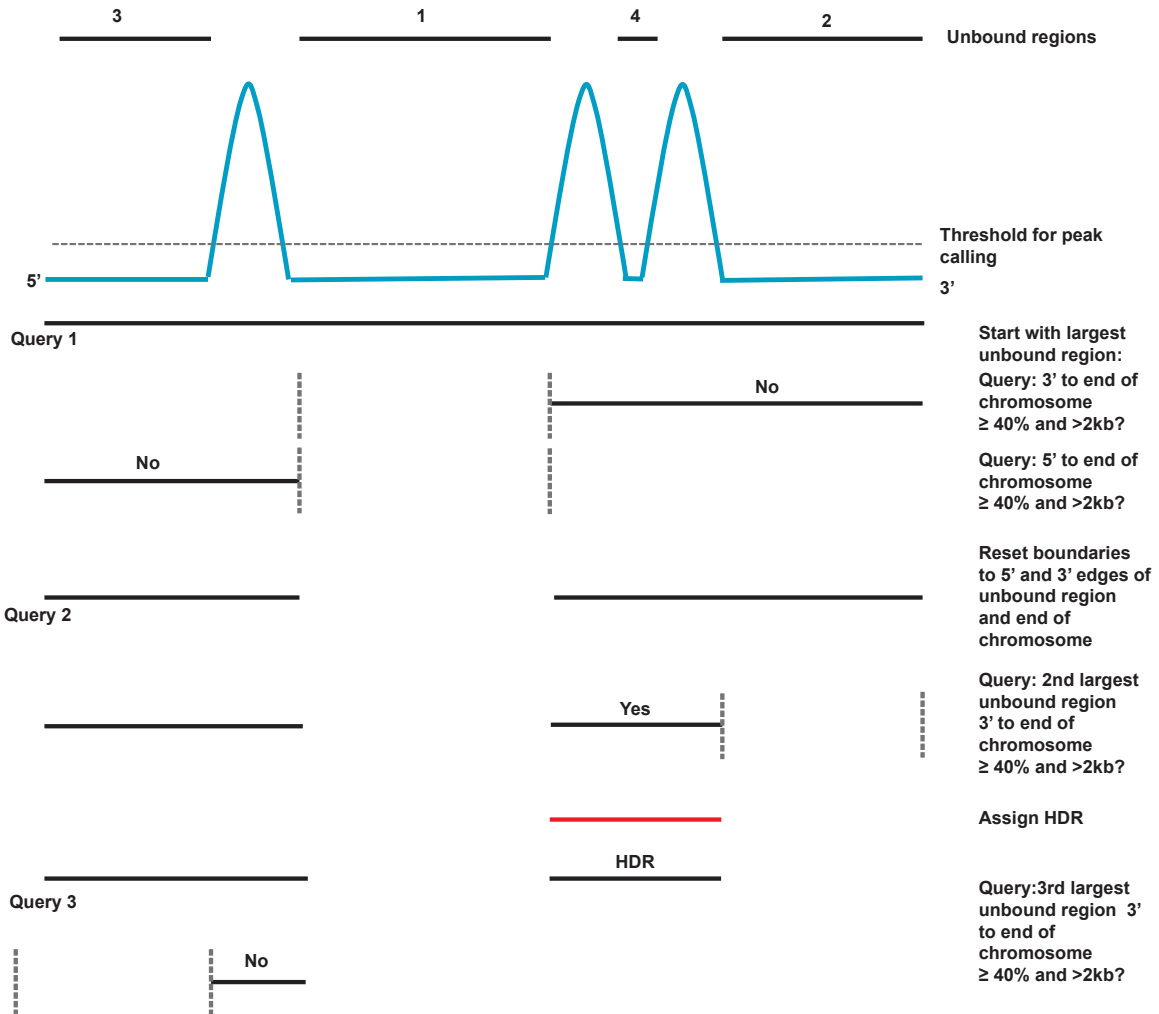

**Figure S8** Assigning High density regions (HDRs). Using a cut-off of the top 3% of Yan-bound peaks the genome was divided into Yan bound and Yan unbound regions. For each unbound region, starting with the largest (1), Yan chromatin occupancy (length of Yan bound region/total region length) was calculated from the 3' end of the unbound region to the 3' end of the chromosome and the 5' end of the bound region to the 5' end of the chromosome. If Yan chromatin occupancy was less than 40%, the boundaries for querying were reset to the edges of the unbound region and the ends of the chromosome. Yan chromatin occupancy was then calculated from the second largest unbound region (2) to the end of the reset boundary. If Yan chromatin occupancy was greater than or equal to 40% and  $> 2\text{kb}$  then this region would be assigned as an HDR as depicted above. Yan chromatin occupancy was calculated for the third largest unbound region (3) to end of the reset boundary. Although here Yan chromatin occupancy is  $> 40\%$  since the region length is  $< 2\text{kb}$  then this region is not assigned as an HDR.



**Table S1 Summary of Yan datasets**

| A. SUMMARY                  |           |          |          |           |          |                      |          |           |          |          |
|-----------------------------|-----------|----------|----------|-----------|----------|----------------------|----------|-----------|----------|----------|
|                             | YAN       |          | YAN      | YAN       |          | YAN <sup>V105R</sup> |          | 6X YAN    |          | D.VIR    |
| STAGE                       | st 11     |          | st 11    | st 5-7    |          | st 11                |          | st 11     |          | st 11    |
| METHOD                      | ChIP-chip |          | ChIP-seq | ChIP-chip |          | ChIP-chip            |          | ChIP-chip |          | ChIP-seq |
| CORRELATION <sup>a</sup>    | 0.98      |          | 0.83     | 0.93      |          | 0.97                 |          | 0.97      |          | 0.93     |
| PROGRAM                     | TAS       | MAT      | MACS     | TAS       | MAT      | TAS                  | MAT      | TAS       | MAT      | MACS     |
| THRESHOLD <sup>b</sup>      | 20.5      | 2.4      | 50       | 9.9       | 1.1      | 9.7                  | 1.4      | 9.8       | 1.6      | 100      |
| # PEAKS                     | 3638      | 3716     | 3311     | 3114      | 3498     | 3009                 | 3531     | 3487      | 3616     | 1170     |
| % PEAKS IN HDR <sup>c</sup> | 41.26     | 42.92    | 39.07    | 21.61     | 25.96    | 20.14                | 26.85    | 42.76     | 43.9     | 43.85    |
| % IN HDR <sup>d</sup>       | 51.41     | 52.73    | 45.35    | 31.24     | 34.84    | 28.23                | 34.89    | 53.05     | 53.4     | 59.85    |
| MEDIAN HDR (bp)             | 4111      | 4111     | 3932     | 3216      | 3382     | 3263                 | 3513     | 3903      | 4074     | 3267     |
| B. OVERLAP <sup>e</sup>     |           |          |          |           |          |                      |          |           |          |          |
|                             | ST11      |          | ST11     | ST5-7     |          | V105R                |          | 6X        |          | D.VIR    |
|                             | TAS       | MAT      | MACS     | TAS       | MAT      | TAS                  | MAT      | TAS       | MAT      | MACS     |
| ST11 TAS                    | -         | 81.13*** | 52.77*** | 55.06*    | 53.70*** | 61.64***             | 59.21*** | 80.15***  | 77.12    | 41.65    |
| ST11 MAT                    | 81.11***  | -        | 52.53*** | 51.75     | 57.56*** | 59.01***             | 63.63*** | 77.80***  | 84.67*** | 41.82    |
| ST11 MACS                   | 48.61***  | 48.42*** | -        | 37.13     | 38.63    | 46.44                | 45.38    | 51.55***  | 50.46*** | 15.04    |
| ST5-7 TAS                   | 45.67*    | 43.85    | 33.73    | -         | 62.34*** | 43.85                | 39.94    | 52.59     | 50.59    | 13.08    |
| ST5-7 MAT                   | 49.30***  | 52.73*** | 38.76    | 69.71***  | -        | 47.87                | 50.91*   | 52.24***  | 56.31*** | 14.13    |
| V105R TAS                   | 49.27***  | 48.26*** | 41.10    | 42.37     | 41.86    | -                    | 59.12*** | 52.32***  | 51.00*** | 36.83    |
| V105R MAT                   | 54.50***  | 58.47*** | 46.04    | 44.23     | 51.16*   | 68.52***             | -        | 57.92***  | 61.11*** | 40.19    |
| 6XYAN TAS                   | 77.59***  | 75.61*** | 54.39*** | 45.50     | 49.80*** | 63.16***             | 60.80*** | -         | 82.63*** | 42.08    |
| 6XYAN MAT                   | 74.87***  | 82.58*** | 53.32*** | 43.93     | 52.92*** | 60.74***             | 64.87*** | 83.33***  | -        | 41.65    |
| D.VIR MACS                  | 15.32     | 15.32    | 38.5     | 31.24     | 35.71    | 16.26                | 15.67    | 16.01     | 16.32    | -        |

<sup>a</sup> Average pairwise correlation of probe intensities of 3 replicates (chip); correlation of tag counts in 2 replicates (seq)

<sup>b</sup>  $-\log_{10}$  p value (TAS, MACS); MAT score (MAT)

<sup>c</sup> High density regions (HDR) identified at 40% occupancy

<sup>d</sup> Total base-pair (bp) length in peaks within HDRs divided by total bp length of all peaks

<sup>e</sup> % peaks in column which intersect with peaks in row. Co-occurrence with  $p < 0.05$  (\*) and  $p < 0.001$  (\*\*\*)

**Table S2 List of putative Yan target genes**

| Gene         | Stage 5-7 | Stage 11 | Dynamic | <i>D. melanogaster</i> | <i>D. virilis</i> |
|--------------|-----------|----------|---------|------------------------|-------------------|
| CG11023      | #N/A      | multiple | -       | #N/A                   | #N/A              |
| l(2)gl       | single    | multiple | yes     | #N/A                   | #N/A              |
| Ir21a        | single    | multiple | yes     | #N/A                   | #N/A              |
| Cda5         | single    | multiple | yes     | single                 | single            |
| dbr          | single    | single   | yes     | single                 | #N/A              |
| galectin     | single    | #N/A     | -       | #N/A                   | #N/A              |
| CG11374      | single    | #N/A     | -       | #N/A                   | #N/A              |
| net          | single    | #N/A     | -       | #N/A                   | #N/A              |
| CG3164       | #N/A      | single   | -       | multiple               | #N/A              |
| Gs1          | #N/A      | single   | -       | #N/A                   | #N/A              |
| CG31975      | #N/A      | dense    | -       | #N/A                   | #N/A              |
| CG31976      | #N/A      | dense    | -       | #N/A                   | #N/A              |
| CG31974      | single    | dense    | yes     | #N/A                   | #N/A              |
| CG11454      | single    | dense    | yes     | #N/A                   | #N/A              |
| CG42399      | single    | dense    | yes     | #N/A                   | #N/A              |
| CG3436       | #N/A      | dense    | -       | #N/A                   | #N/A              |
| CG33635      | single    | dense    | yes     | dense                  | #N/A              |
| spen         | single    | dense    | yes     | dense                  | multiple          |
| kis          | multiple  | dense    | yes     | dense                  | #N/A              |
| Rpp30        | single    | #N/A     | -       | dense                  | #N/A              |
| CG3645       | single    | #N/A     | -       | dense                  | #N/A              |
| CG17078      | single    | #N/A     | -       | #N/A                   | #N/A              |
| smo          | multiple  | single   | yes     | single                 | #N/A              |
| CG11601      | multiple  | single   | yes     | single                 | dense             |
| CG3625       | multiple  | single   | yes     | single                 | dense             |
| Plc21C       | #N/A      | single   | -       | multiple               | #N/A              |
| CG31920      | #N/A      | single   | -       | multiple               | #N/A              |
| CG33992      | #N/A      | single   | -       | #N/A                   | #N/A              |
| CG31921      | #N/A      | single   | -       | #N/A                   | #N/A              |
| Ent1         | single    | #N/A     | -       | single                 | #N/A              |
| al           | single    | dense    | yes     | multiple               | #N/A              |
| ebi          | #N/A      | single   | -       | #N/A                   | #N/A              |
| CG13690      | single    | single   | yes     | #N/A                   | #N/A              |
| RpLP1        | single    | single   | yes     | single                 | #N/A              |
| CG11885      | single    | single   | yes     | single                 | #N/A              |
| CG13692      | single    | single   | yes     | single                 | #N/A              |
| BBS8         | single    | #N/A     | -       | #N/A                   | #N/A              |
| ex           | single    | multiple | yes     | multiple               | #N/A              |
| crq          | #N/A      | single   | -       | #N/A                   | #N/A              |
| CG4164       | #N/A      | single   | -       | #N/A                   | #N/A              |
| CG4133       | #N/A      | single   | -       | #N/A                   | #N/A              |
| cbt          | dense     | dense    | no      | #N/A                   | #N/A              |
| ush          | dense     | dense    | no      | dense                  | dense             |
| lwr          | multiple  | #N/A     | -       | #N/A                   | dense             |
| Spp          | multiple  | #N/A     | -       | #N/A                   | dense             |
| nAcRbeta-21C | single    | #N/A     | -       | #N/A                   | dense             |
| Gsc          | multiple  | #N/A     | -       | single                 | #N/A              |
| CG13689      | multiple  | #N/A     | -       | #N/A                   | #N/A              |
| ds           | dense     | multiple | yes     | multiple               | #N/A              |

|                    |          |          |     |          |          |
|--------------------|----------|----------|-----|----------|----------|
| GABA-B-R3          | single   | #N/A     | -   | #N/A     | #N/A     |
| CG3662             | single   | dense    | yes | #N/A     | #N/A     |
| CG3862             | single   | dense    | yes | single   | #N/A     |
| dock               | single   | dense    | yes | single   | #N/A     |
| drongo             | single   | multiple | yes | single   | #N/A     |
| CG4291             | single   | single   | no  | single   | #N/A     |
| kraken             | single   | single   | no  | #N/A     | #N/A     |
| aru                | multiple | single   | yes | #N/A     | #N/A     |
| snoRNA:Me28S-U1230 | single   | single   | no  | #N/A     | #N/A     |
| dbe                | multiple | single   | yes | #N/A     | #N/A     |
| PNUTS              | multiple | single   | yes | single   | #N/A     |
| S                  | dense    | dense    | no  | dense    | dense    |
| ast                | dense    | dense    | no  | #N/A     | dense    |
| Atg4               | dense    | dense    | no  | #N/A     | dense    |
| CG14340            | single   | #N/A     | -   | #N/A     | #N/A     |
| Pino               | single   | #N/A     | -   | #N/A     | #N/A     |
| lea                | multiple | dense    | yes | dense    | multiple |
| snRNA:U3:22A       | multiple | dense    | yes | #N/A     | single   |
| CG31928            | #N/A     | single   | -   | single   | #N/A     |
| CG18131            | single   | #N/A     | -   | #N/A     | #N/A     |
| CG7420             | single   | #N/A     | -   | single   | #N/A     |
| CG18132            | single   | #N/A     | -   | single   | #N/A     |
| halo               | single   | #N/A     | -   | single   | #N/A     |
| Or22a              | single   | #N/A     | -   | #N/A     | #N/A     |
| haf                | multiple | dense    | yes | single   | single   |
| chinmo             | multiple | #N/A     | -   | #N/A     | #N/A     |
| Eno                | #N/A     | single   | -   | #N/A     | #N/A     |
| Rrp40              | #N/A     | single   | -   | #N/A     | #N/A     |
| CG31937            | #N/A     | single   | -   | #N/A     | #N/A     |
| CG17652            | #N/A     | single   | -   | #N/A     | #N/A     |
| CG17646            | #N/A     | single   | -   | #N/A     | #N/A     |
| CG15358            | #N/A     | single   | -   | #N/A     | #N/A     |
| CG7337             | #N/A     | single   | -   | #N/A     | #N/A     |
| CG31670            | multiple | #N/A     | -   | #N/A     | #N/A     |
| tRNA:CR31942       | multiple | multiple | -   | #N/A     | #N/A     |
| CG10908            | #N/A     | single   | -   | #N/A     | #N/A     |
| Nplp4              | #N/A     | multiple | -   | #N/A     | #N/A     |
| CG4238             | #N/A     | multiple | -   | multiple | #N/A     |
| tRNA:CR31939       | #N/A     | multiple | -   | #N/A     | #N/A     |
| tRNA:CR31940       | #N/A     | multiple | -   | #N/A     | #N/A     |
| tRNA:CR31669       | #N/A     | multiple | -   | #N/A     | #N/A     |
| aop                | dense    | dense    | no  | dense    | dense    |
| tRNA:CR31946       | dense    | dense    | no  | #N/A     | #N/A     |
| CG10874            | dense    | dense    | no  | dense    | dense    |
| CG34172            | #N/A     | dense    | -   | dense    | dense    |
| CG31668            | dense    | dense    | no  | #N/A     | #N/A     |
| CG9967             | single   | #N/A     | -   | #N/A     | dense    |
| eyes               | single   | #N/A     | -   | #N/A     | dense    |
| CG3597             | single   | #N/A     | -   | #N/A     | #N/A     |
| CG3609             | single   | #N/A     | -   | #N/A     | #N/A     |
| CG15390            | single   | #N/A     | -   | #N/A     | #N/A     |
| CG9866             | single   | #N/A     | -   | #N/A     | #N/A     |
| dpp                | dense    | dense    | yes | dense    | #N/A     |

|              |          |          |     |          |          |
|--------------|----------|----------|-----|----------|----------|
| tRNA:Y1:22Fb | dense    | dense    | yes | #N/A     | #N/A     |
| tRNA:Y1:22Fa | single   | dense    | yes | #N/A     | #N/A     |
| CG15393      | single   | dense    | yes | #N/A     | #N/A     |
| Slh          | single   | dense    | yes | #N/A     | #N/A     |
| oaf          | single   | dense    | yes | #N/A     | #N/A     |
| CG34314      | single   | #N/A     | -   | #N/A     | #N/A     |
| Rad1         | single   | #N/A     | -   | #N/A     | #N/A     |
| CG3227       | single   | #N/A     | -   | #N/A     | #N/A     |
| CG9883       | single   | #N/A     | -   | #N/A     | #N/A     |
| CG3214       | single   | #N/A     | -   | #N/A     | #N/A     |
| p16-ARC      | single   | #N/A     | -   | #N/A     | #N/A     |
| CG31690      | single   | #N/A     | -   | #N/A     | single   |
| Pgk          | dense    | dense    | no  | #N/A     | #N/A     |
| CG9894       | dense    | dense    | no  | dense    | #N/A     |
| CG9960       | dense    | dense    | no  | #N/A     | #N/A     |
| snapin       | dense    | dense    | no  | #N/A     | #N/A     |
| daw          | single   | #N/A     | -   | #N/A     | #N/A     |
| CG3104       | single   | single   | no  | #N/A     | #N/A     |
| oho23B       | single   | multiple | yes | single   | #N/A     |
| CG2991       | single   | multiple | yes | multiple | dense    |
| CG8814       | single   | #N/A     | -   | #N/A     | dense    |
| Prx6005      | single   | #N/A     | -   | #N/A     | #N/A     |
| CG31950      | single   | #N/A     | -   | #N/A     | #N/A     |
| betaggt-II   | single   | #N/A     | -   | #N/A     | #N/A     |
| NTPase       | multiple | multiple | no  | multiple | #N/A     |
| lilli        | multiple | multiple | no  | multiple | multiple |
| Rbp9         | single   | #N/A     | -   | #N/A     | #N/A     |
| Ts           | single   | #N/A     | -   | #N/A     | #N/A     |
| Rrp1         | single   | #N/A     | -   | #N/A     | #N/A     |
| CG3165       | single   | #N/A     | -   | #N/A     | #N/A     |
| CG9643       | single   | #N/A     | -   | #N/A     | #N/A     |
| Chd1         | single   | #N/A     | -   | #N/A     | #N/A     |
| Bem46        | single   | single   | no  | #N/A     | #N/A     |
| okr          | single   | single   | no  | #N/A     | #N/A     |
| CG3558       | multiple | dense    | yes | #N/A     | single   |
| CG3523       | multiple | single   | yes | #N/A     | #N/A     |
| toc          | multiple | multiple | no  | #N/A     | #N/A     |
| Mad          | #N/A     | single   | -   | #N/A     | dense    |
| CG34406      | single   | #N/A     | -   | #N/A     | dense    |
| tRNA:S7:23Ea | single   | #N/A     | -   | #N/A     | #N/A     |
| CG31698      | single   | #N/A     | -   | #N/A     | #N/A     |
| CG15404      | single   | #N/A     | -   | #N/A     | #N/A     |
| CG34393      | single   | #N/A     | -   | #N/A     | #N/A     |
| CG9663       | single   | single   | no  | single   | single   |
| pgant4       | #N/A     | single   | -   | #N/A     | single   |
| Thor         | #N/A     | single   | -   | single   | single   |
| CG15414      | #N/A     | single   | -   | #N/A     | #N/A     |
| Spindly      | #N/A     | single   | -   | #N/A     | #N/A     |
| CG8853       | #N/A     | single   | -   | #N/A     | #N/A     |
| drm          | #N/A     | dense    | -   | dense    | #N/A     |
| sob          | multiple | dense    | yes | #N/A     | #N/A     |
| odd          | dense    | dense    | yes | #N/A     | #N/A     |
| CG15418      | #N/A     | single   | -   | #N/A     | #N/A     |

|              |          |          |     |          |          |
|--------------|----------|----------|-----|----------|----------|
| for          | multiple | multiple | yes | single   | #N/A     |
| cutlet       | single   | #N/A     | -   | #N/A     | #N/A     |
| CG31955      | single   | #N/A     | -   | #N/A     | #N/A     |
| CG2818       | single   | #N/A     | -   | #N/A     | #N/A     |
| CG31772      | single   | #N/A     | -   | #N/A     | #N/A     |
| bowl         | multiple | single   | yes | dense    | #N/A     |
| CG3407       | #N/A     | single   | -   | #N/A     | #N/A     |
| slp1         | multiple | dense    | yes | dense    | single   |
| slp2         | single   | dense    | yes | dense    | #N/A     |
| CG3964       | single   | single   | no  | single   | #N/A     |
| ed           | dense    | multiple | yes | multiple | single   |
| Sr-CIII      | single   | multiple | yes | #N/A     | #N/A     |
| Sr-CI        | single   | multiple | yes | #N/A     | #N/A     |
| CG3714       | single   | #N/A     | -   | #N/A     | dense    |
| ft           | single   | #N/A     | -   | #N/A     | #N/A     |
| CG3702       | #N/A     | single   | -   | #N/A     | #N/A     |
| Art2         | single   | multiple | yes | #N/A     | dense    |
| tutl         | #N/A     | multiple | -   | multiple | dense    |
| CG16857      | single   | single   | no  | #N/A     | single   |
| Atet         | single   | dense    | yes | dense    | single   |
| CG15429      | single   | dense    | yes | #N/A     | #N/A     |
| Traf4        | multiple | dense    | yes | dense    | dense    |
| CG17612      | multiple | dense    | yes | #N/A     | dense    |
| dp           | single   | dense    | yes | #N/A     | single   |
| HP6          | #N/A     | multiple | -   | #N/A     | #N/A     |
| CG3355       | single   | #N/A     | -   | single   | #N/A     |
| CG15629      | single   | #N/A     | -   | #N/A     | #N/A     |
| CG15628      | single   | #N/A     | -   | single   | dense    |
| lr25a        | single   | #N/A     | -   | #N/A     | dense    |
| CG15626      | single   | #N/A     | -   | #N/A     | dense    |
| CG12194      | single   | #N/A     | -   | #N/A     | #N/A     |
| CG31660      | single   | #N/A     | -   | #N/A     | #N/A     |
| CG15625      | multiple | single   | yes | single   | single   |
| CG3036       | multiple | single   | yes | single   | multiple |
| hoe1         | single   | #N/A     | -   | #N/A     | #N/A     |
| Rtnl1        | multiple | multiple | no  | dense    | #N/A     |
| CG31917      | #N/A     | single   | -   | #N/A     | #N/A     |
| Tfb5         | #N/A     | single   | -   | #N/A     | #N/A     |
| CG3887       | #N/A     | single   | -   | #N/A     | #N/A     |
| vkg          | single   | single   | no  | #N/A     | #N/A     |
| Cg25C        | single   | #N/A     | -   | #N/A     | #N/A     |
| qtc          | single   | single   | no  | #N/A     | single   |
| Rpl37A       | single   | single   | no  | single   | #N/A     |
| pgant5       | multiple | multiple | yes | dense    | dense    |
| CG5828       | single   | multiple | yes | dense    | #N/A     |
| CG4230       | single   | multiple | yes | #N/A     | #N/A     |
| CG8680       | #N/A     | single   | -   | #N/A     | #N/A     |
| Msp-300      | multiple | #N/A     | -   | multiple | #N/A     |
| tkv          | #N/A     | dense    | -   | multiple | #N/A     |
| tRNA:CR31971 | #N/A     | single   | -   | #N/A     | #N/A     |
| tRNA:CR31914 | #N/A     | single   | -   | #N/A     | #N/A     |
| CG14033      | #N/A     | multiple | -   | #N/A     | #N/A     |
| Bsg25D       | single   | #N/A     | -   | single   | #N/A     |

|                    |          |          |     |          |          |
|--------------------|----------|----------|-----|----------|----------|
| Bub1               | single   | #N/A     | -   | #N/A     | #N/A     |
| cype               | single   | #N/A     | -   | #N/A     | #N/A     |
| CG14022            | single   | #N/A     | -   | #N/A     | #N/A     |
| TotM               | single   | #N/A     | -   | #N/A     | #N/A     |
| fusl               | single   | #N/A     | -   | #N/A     | #N/A     |
| nompC              | #N/A     | multiple | -   | #N/A     | #N/A     |
| H15                | single   | multiple | yes | multiple | #N/A     |
| snoRNA:Me28S-A2486 | #N/A     | multiple | -   | #N/A     | #N/A     |
| mid                | multiple | dense    | yes | single   | #N/A     |
| CG6907             | #N/A     | single   | -   | #N/A     | #N/A     |
| Cap-D3             | #N/A     | single   | -   | #N/A     | #N/A     |
| CG31648            | #N/A     | single   | -   | #N/A     | #N/A     |
| CG31915            | #N/A     | single   | -   | #N/A     | #N/A     |
| CG7277             | #N/A     | single   | -   | #N/A     | #N/A     |
| Lam                | multiple | #N/A     | -   | #N/A     | #N/A     |
| Oscillin           | multiple | #N/A     | -   | #N/A     | #N/A     |
| CG14014            | multiple | #N/A     | -   | #N/A     | #N/A     |
| CG11030            | single   | #N/A     | -   | #N/A     | #N/A     |
| obst-E             | single   | #N/A     | -   | #N/A     | #N/A     |
| CG8965             | multiple | dense    | yes | dense    | multiple |
| Acp26Ab            | multiple | multiple | yes | #N/A     | single   |
| Acp26Aa            | multiple | multiple | yes | #N/A     | single   |
| CG9021             | #N/A     | multiple | -   | single   | #N/A     |
| bchs               | #N/A     | single   | -   | single   | #N/A     |
| CG14000            | #N/A     | single   | -   | #N/A     | #N/A     |
| Sfp26Ad            | #N/A     | single   | -   | single   | #N/A     |
| Gpdh               | #N/A     | single   | -   | single   | #N/A     |
| chic               | single   | dense    | yes | dense    | single   |
| eIF-4a             | multiple | dense    | yes | dense    | single   |
| ifc                | single   | single   | no  | dense    | #N/A     |
| lid                | single   | single   | no  | single   | single   |
| Tsp26A             | single   | single   | no  | #N/A     | single   |
| H2.0               | single   | single   | yes | dense    | #N/A     |
| CG13996            | single   | single   | no  | dense    | #N/A     |
| CG9107             | #N/A     | single   | -   | dense    | #N/A     |
| CG9162             | single   | single   | yes | single   | single   |
| Kr-h1              | multiple | single   | yes | #N/A     | dense    |
| stai               | single   | #N/A     | -   | #N/A     | dense    |
| Arc-p20            | multiple | #N/A     | -   | #N/A     | #N/A     |
| WDR79              | multiple | #N/A     | -   | #N/A     | #N/A     |
| tectonic           | multiple | #N/A     | -   | #N/A     | #N/A     |
| CG9222             | single   | #N/A     | -   | #N/A     | #N/A     |
| CG34380            | multiple | dense    | yes | multiple | #N/A     |
| Ugt37b1            | single   | #N/A     | -   | #N/A     | single   |
| Ddr                | multiple | multiple | yes | multiple | #N/A     |
| CG9486             | #N/A     | single   | -   | #N/A     | #N/A     |
| Pez                | #N/A     | single   | -   | single   | #N/A     |
| Cpr                | #N/A     | single   | -   | single   | dense    |
| CG9498             | single   | #N/A     | -   | #N/A     | dense    |
| ppk7               | single   | #N/A     | -   | #N/A     | #N/A     |
| ppk14              | single   | #N/A     | -   | #N/A     | #N/A     |
| CG9500             | single   | #N/A     | -   | #N/A     | #N/A     |
| CG9505             | dense    | #N/A     | -   | #N/A     | #N/A     |

|           |          |          |     |          |        |
|-----------|----------|----------|-----|----------|--------|
| slam      | dense    | #N/A     | -   | #N/A     | #N/A   |
| CG42368   | dense    | #N/A     | -   | #N/A     | single |
| retm      | single   | #N/A     | -   | #N/A     | #N/A   |
| CG9526    | single   | #N/A     | -   | #N/A     | #N/A   |
| CG16947   | single   | single   | yes | #N/A     | #N/A   |
| mmy       | single   | single   | no  | #N/A     | #N/A   |
| CG9536    | single   | single   | no  | #N/A     | single |
| CG31638   | single   | single   | no  | #N/A     | #N/A   |
| CG9550    | single   | single   | no  | #N/A     | #N/A   |
| CG31637   | single   | multiple | yes | dense    | dense  |
| eya       | #N/A     | multiple | -   | dense    | dense  |
| osm-6     | #N/A     | single   | -   | #N/A     | #N/A   |
| CG11050   | single   | single   | yes | single   | #N/A   |
| CG31635   | single   | #N/A     | -   | #N/A     | single |
| cort      | single   | #N/A     | -   | #N/A     | #N/A   |
| CG11329   | single   | #N/A     | -   | #N/A     | #N/A   |
| Nhe3      | single   | #N/A     | -   | #N/A     | #N/A   |
| CG11327   | #N/A     | multiple | -   | #N/A     | #N/A   |
| Tsp       | #N/A     | multiple | -   | multiple | #N/A   |
| TTLL3B    | single   | single   | no  | #N/A     | #N/A   |
| TTLL3A    | single   | single   | no  | #N/A     | #N/A   |
| nrv2      | #N/A     | single   | -   | single   | single |
| sens-2    | multiple | multiple | yes | multiple | #N/A   |
| neuroigin | single   | #N/A     | -   | #N/A     | #N/A   |
| SA        | single   | single   | no  | dense    | #N/A   |
| CG13775   | single   | single   | no  | dense    | #N/A   |
| CG3430    | single   | single   | no  | dense    | #N/A   |
| Atac1     | single   | single   | no  | #N/A     | #N/A   |
| CG10399   | #N/A     | single   | -   | #N/A     | #N/A   |
| SP1070    | multiple | single   | yes | single   | #N/A   |
| CG13776   | multiple | single   | yes | #N/A     | #N/A   |
| ade3      | single   | #N/A     | -   | #N/A     | #N/A   |
| Pcp       | single   | #N/A     | -   | #N/A     | #N/A   |
| CG31908   | single   | #N/A     | -   | #N/A     | single |
| CG3476    | single   | #N/A     | -   | #N/A     | single |
| milt      | single   | #N/A     | -   | single   | dense  |
| CG31630   | single   | #N/A     | -   | #N/A     | dense  |
| Pvf3      | dense    | dense    | no  | dense    | #N/A   |
| CG4495    | #N/A     | single   | -   | #N/A     | #N/A   |
| CG13784   | #N/A     | single   | -   | multiple | dense  |
| CG4567    | #N/A     | single   | -   | single   | dense  |
| Ndae1     | single   | #N/A     | -   | #N/A     | dense  |
| Wnt4      | #N/A     | dense    | -   | #N/A     | single |
| wg        | dense    | dense    | no  | dense    | #N/A   |
| Wnt6      | #N/A     | single   | -   | #N/A     | #N/A   |
| Pbprp5    | dense    | multiple | yes | multiple | dense  |
| Rapgap1   | dense    | dense    | yes | dense    | dense  |
| CG13791   | #N/A     | multiple | -   | single   | #N/A   |
| Spn7      | multiple | multiple | yes | #N/A     | #N/A   |
| Cyp4d21   | single   | single   | no  | #N/A     | #N/A   |
| CG6739    | #N/A     | dense    | -   | #N/A     | #N/A   |
| CG13792   | single   | multiple | yes | #N/A     | #N/A   |
| CG7149    | single   | single   | no  | #N/A     | #N/A   |

|              |          |          |     |          |          |
|--------------|----------|----------|-----|----------|----------|
| LKR          | single   | single   | no  | #N/A     | #N/A     |
| cdc14        | #N/A     | single   | -   | #N/A     | dense    |
| LanB1        | single   | multiple | yes | single   | dense    |
| CG7115       | multiple | multiple | no  | #N/A     | #N/A     |
| Rack1        | multiple | multiple | no  | single   | #N/A     |
| mts          | multiple | multiple | no  | single   | #N/A     |
| CG7102       | single   | #N/A     | -   | single   | #N/A     |
| CG31902      | single   | #N/A     | -   | #N/A     | #N/A     |
| CG33121      | single   | #N/A     | -   | #N/A     | #N/A     |
| Snoo         | multiple | #N/A     | -   | #N/A     | single   |
| pes          | #N/A     | single   | -   | dense    | dense    |
| CG7227       | #N/A     | single   | -   | dense    | #N/A     |
| CG7367       | #N/A     | single   | -   | dense    | #N/A     |
| baf          | #N/A     | single   | -   | dense    | #N/A     |
| Cka          | #N/A     | single   | -   | dense    | #N/A     |
| CG8673       | single   | single   | no  | #N/A     | dense    |
| CG12375      | single   | single   | no  | #N/A     | dense    |
| CG8668       | single   | single   | no  | dense    | dense    |
| CG8552       | multiple | single   | yes | single   | dense    |
| CG31606      | single   | single   | yes | single   | #N/A     |
| Rbsn-5       | single   | single   | no  | #N/A     | dense    |
| CG8498       | single   | single   | no  | single   | dense    |
| CG8486       | single   | single   | no  | single   | #N/A     |
| CG8086       | #N/A     | dense    | -   | #N/A     | single   |
| Btk29A       | multiple | dense    | yes | dense    | multiple |
| tRNA:K5:29A  | single   | multiple | yes | #N/A     | #N/A     |
| CG7830       | #N/A     | single   | -   | single   | #N/A     |
| CG7818       | #N/A     | single   | -   | single   | #N/A     |
| CG7810       | #N/A     | single   | -   | single   | #N/A     |
| CG7806       | #N/A     | single   | -   | #N/A     | #N/A     |
| RpS13        | single   | #N/A     | -   | #N/A     | #N/A     |
| CSN8         | single   | #N/A     | -   | #N/A     | #N/A     |
| Pp2A-29B     | single   | #N/A     | -   | #N/A     | #N/A     |
| CG13398      | dense    | dense    | no  | dense    | #N/A     |
| Akap200      | dense    | dense    | yes | dense    | dense    |
| Dh31         | single   | #N/A     | -   | #N/A     | #N/A     |
| CG13096      | single   | #N/A     | -   | #N/A     | #N/A     |
| CG13097      | single   | #N/A     | -   | #N/A     | #N/A     |
| CG13091      | single   | #N/A     | -   | #N/A     | #N/A     |
| Acer         | single   | #N/A     | -   | #N/A     | #N/A     |
| CG34441      | multiple | #N/A     | -   | #N/A     | #N/A     |
| lmg          | multiple | #N/A     | -   | #N/A     | #N/A     |
| CG17834      | multiple | #N/A     | -   | #N/A     | #N/A     |
| tRNA:CR31604 | single   | #N/A     | -   | #N/A     | #N/A     |
| tRNA:CR31603 | single   | #N/A     | -   | #N/A     | #N/A     |
| Sema-1a      | multiple | multiple | no  | multiple | #N/A     |
| Glt          | single   | #N/A     | -   | #N/A     | #N/A     |
| Trs23        | single   | single   | no  | #N/A     | #N/A     |
| Hnf4         | single   | single   | no  | #N/A     | single   |
| CG9468       | #N/A     | single   | -   | #N/A     | #N/A     |
| SoxN         | multiple | multiple | yes | #N/A     | #N/A     |
| CG32986      | single   | dense    | yes | single   | #N/A     |
| C1GalTA      | multiple | single   | yes | single   | #N/A     |



|               |          |          |     |          |        |
|---------------|----------|----------|-----|----------|--------|
| CG31886       | multiple | multiple | yes | #N/A     | #N/A   |
| CG9525        | single   | single   | no  | #N/A     | #N/A   |
| CG31609       | single   | #N/A     | -   | #N/A     | #N/A   |
| CG32982       | multiple | multiple | yes | multiple | #N/A   |
| CG9586        | single   | multiple | yes | #N/A     | #N/A   |
| tai           | multiple | multiple | yes | #N/A     | #N/A   |
| Ggamma30A     | single   | #N/A     | -   | #N/A     | single |
| CG17005       | single   | #N/A     | -   | #N/A     | #N/A   |
| CG34366       | single   | #N/A     | -   | #N/A     | #N/A   |
| CG3759        | single   | #N/A     | -   | #N/A     | dense  |
| numb          | dense    | multiple | yes | dense    | #N/A   |
| Gdi           | #N/A     | single   | -   | #N/A     | single |
| CG33298       | #N/A     | multiple | -   | single   | single |
| Oatp30B       | #N/A     | single   | -   | single   | #N/A   |
| CG31709       | #N/A     | dense    | -   | #N/A     | #N/A   |
| gcm           | multiple | dense    | yes | #N/A     | #N/A   |
| CG3841        | #N/A     | single   | -   | #N/A     | #N/A   |
| CG4382        | single   | single   | no  | single   | #N/A   |
| gcm2          | single   | single   | no  | single   | #N/A   |
| Trx-2         | single   | single   | no  | #N/A     | #N/A   |
| GlcAT-S       | single   | single   | no  | single   | #N/A   |
| CG15828       | multiple | single   | yes | single   | #N/A   |
| CG33299       | single   | #N/A     | -   | #N/A     | #N/A   |
| Pka-C1        | #N/A     | multiple | -   | #N/A     | dense  |
| hoip          | #N/A     | multiple | -   | single   | dense  |
| pelo          | #N/A     | multiple | -   | multiple | dense  |
| CG31710       | #N/A     | multiple | -   | single   | dense  |
| CR18854       | single   | #N/A     | -   | #N/A     | #N/A   |
| CG4036        | single   | #N/A     | -   | #N/A     | #N/A   |
| CG13123       | single   | #N/A     | -   | #N/A     | #N/A   |
| nAcRalpha-30D | single   | #N/A     | -   | #N/A     | #N/A   |
| Bka           | #N/A     | single   | -   | #N/A     | #N/A   |
| sop           | #N/A     | single   | -   | single   | #N/A   |
| Muc30E        | #N/A     | single   | -   | single   | #N/A   |
| CG4619        | single   | #N/A     | -   | single   | #N/A   |
| CG5853        | single   | single   | yes | multiple | #N/A   |
| CG13130       | #N/A     | dense    | -   | #N/A     | #N/A   |
| bib           | multiple | dense    | yes | dense    | dense  |
| Cpr31A        | single   | #N/A     | -   | #N/A     | #N/A   |
| Pen           | single   | single   | -   | #N/A     | #N/A   |
| Sur           | single   | #N/A     | -   | #N/A     | #N/A   |
| Ripalpha      | single   | #N/A     | -   | #N/A     | #N/A   |
| Rpl7          | single   | #N/A     | -   | #N/A     | #N/A   |
| CG34159       | single   | #N/A     | -   | #N/A     | #N/A   |
| CG4908        | single   | #N/A     | -   | #N/A     | #N/A   |
| CG5708        | multiple | #N/A     | -   | #N/A     | #N/A   |
| CG5694        | multiple | #N/A     | -   | #N/A     | #N/A   |
| eEF1delta     | multiple | single   | yes | #N/A     | #N/A   |
| CG31720       | single   | single   | yes | #N/A     | #N/A   |
| me31B         | #N/A     | single   | -   | #N/A     | #N/A   |
| Pten          | single   | #N/A     | -   | #N/A     | single |
| Rsf1          | single   | #N/A     | -   | #N/A     | single |
| CG18619       | single   | #N/A     | -   | #N/A     | #N/A   |

|           |          |          |     |          |        |
|-----------|----------|----------|-----|----------|--------|
| CG5604    | single   | #N/A     | -   | #N/A     | #N/A   |
| Hand      | single   | #N/A     | -   | #N/A     | #N/A   |
| CG5385    | single   | #N/A     | -   | #N/A     | #N/A   |
| CG5384    | single   | #N/A     | -   | #N/A     | #N/A   |
| CG4972    | single   | #N/A     | -   | #N/A     | #N/A   |
| CG5381    | single   | #N/A     | -   | #N/A     | #N/A   |
| CG5037    | single   | single   | no  | #N/A     | #N/A   |
| GATAd     | single   | single   | yes | single   | #N/A   |
| SamDC     | single   | #N/A     | -   | single   | #N/A   |
| CG31715   | single   | #N/A     | -   | #N/A     | #N/A   |
| Sps2      | single   | #N/A     | -   | #N/A     | #N/A   |
| CG5022    | single   | #N/A     | -   | #N/A     | #N/A   |
| da        | single   | #N/A     | -   | #N/A     | #N/A   |
| CG5362    | single   | #N/A     | -   | #N/A     | #N/A   |
| CG5355    | single   | #N/A     | -   | #N/A     | #N/A   |
| Klp31E    | multiple | #N/A     | -   | #N/A     | #N/A   |
| RfC3      | single   | #N/A     | -   | #N/A     | #N/A   |
| pie       | single   | #N/A     | -   | #N/A     | #N/A   |
| RluA-1    | single   | #N/A     | -   | #N/A     | #N/A   |
| Myo31DF   | single   | single   | no  | single   | single |
| CG6094    | single   | single   | no  | single   | single |
| CG7384    | single   | single   | no  | #N/A     | single |
| Fatp      | multiple | #N/A     | -   | #N/A     | single |
| Lrr47     | multiple | #N/A     | -   | #N/A     | #N/A   |
| Lip4      | #N/A     | single   | -   | #N/A     | #N/A   |
| Trim9     | multiple | multiple | no  | multiple | dense  |
| CG17104   | single   | #N/A     | -   | #N/A     | #N/A   |
| CG17124   | single   | #N/A     | -   | #N/A     | dense  |
| CG7309    | single   | #N/A     | -   | #N/A     | #N/A   |
| CG16833   | single   | #N/A     | -   | #N/A     | #N/A   |
| aub       | single   | #N/A     | -   | #N/A     | #N/A   |
| CG14915   | single   | #N/A     | -   | #N/A     | #N/A   |
| Ast-C     | single   | #N/A     | -   | #N/A     | #N/A   |
| ab        | single   | multiple | yes | multiple | #N/A   |
| CG14926   | #N/A     | dense    | -   | #N/A     | #N/A   |
| salr      | single   | #N/A     | -   | #N/A     | #N/A   |
| salr      | dense    | dense    | yes | dense    | dense  |
| sala      | #N/A     | single   | -   | #N/A     | #N/A   |
| CG6509    | single   | single   | no  | #N/A     | #N/A   |
| CG4970    | single   | single   | no  | #N/A     | #N/A   |
| CG14929   | single   | single   | no  | #N/A     | #N/A   |
| Mst33A    | single   | single   | no  | #N/A     | #N/A   |
| CG14939   | multiple | single   | yes | #N/A     | #N/A   |
| Pde1c     | multiple | single   | yes | #N/A     | dense  |
| bft       | single   | multiple | yes | #N/A     | single |
| CG16965   | #N/A     | multiple | -   | #N/A     | #N/A   |
| CG12264   | dense    | dense    | no  | #N/A     | dense  |
| CG6746    | dense    | dense    | no  | #N/A     | dense  |
| Rh5       | dense    | dense    | no  | dense    | dense  |
| CG6734    | dense    | dense    | no  | #N/A     | dense  |
| I(2)01810 | single   | #N/A     | -   | #N/A     | #N/A   |
| Jhl-21    | single   | single   | no  | #N/A     | #N/A   |
| CG5317    | single   | single   | no  | #N/A     | #N/A   |

|                |          |        |     |          |        |
|----------------|----------|--------|-----|----------|--------|
| CG34164        | single   | single | no  | #N/A     | #N/A   |
| rab3-GAP       | single   | single | no  | #N/A     | #N/A   |
| CG14947        | multiple | single | yes | #N/A     | #N/A   |
| prd            | dense    | #N/A   | -   | #N/A     | #N/A   |
| CG5325         | single   | #N/A   | -   | #N/A     | #N/A   |
| CG6712         | single   | #N/A   | -   | single   | #N/A   |
| CG6579         | single   | single | no  | #N/A     | #N/A   |
| aret           | single   | #N/A   | -   | #N/A     | single |
| bru-2          | single   | single | yes | single   | #N/A   |
| Pkd2           | single   | #N/A   | -   | #N/A     | single |
| SC35           | #N/A     | single | -   | #N/A     | #N/A   |
| Elf            | #N/A     | single | -   | #N/A     | #N/A   |
| bun            | multiple | single | yes | multiple | single |
| nub            | multiple | dense  | yes | dense    | single |
| ref2           | #N/A     | single | -   | #N/A     | #N/A   |
| pdm2           | multiple | dense  | yes | multiple | #N/A   |
| CG15485        | single   | dense  | yes | single   | #N/A   |
| CG9932         | single   | single | no  | #N/A     | single |
| CG5122         | single   | #N/A   | -   | #N/A     | #N/A   |
| CG5204         | single   | #N/A   | -   | #N/A     | #N/A   |
| DnaJ-H         | single   | #N/A   | -   | single   | #N/A   |
| Sir2           | single   | #N/A   | -   | single   | #N/A   |
| CG16972        | single   | #N/A   | -   | single   | #N/A   |
| Pect           | multiple | #N/A   | -   | single   | single |
| CG15482        | single   | #N/A   | -   | #N/A     | single |
| snRNA:U2:34ABa | single   | #N/A   | -   | #N/A     | single |
| kek4           | multiple | #N/A   | -   | #N/A     | dense  |
| snRNA:U2:34ABb | single   | #N/A   | -   | #N/A     | dense  |
| CG9426         | single   | #N/A   | -   | #N/A     | dense  |
| Ski6           | dense    | dense  | no  | #N/A     | dense  |
| CG16812        | dense    | dense  | no  | dense    | dense  |
| CG15480        | dense    | dense  | no  | dense    | #N/A   |
| CG16813        | dense    | dense  | no  | dense    | #N/A   |
| CG16815        | dense    | dense  | no  | dense    | #N/A   |
| Prosalpha6T    | dense    | dense  | no  | #N/A     | #N/A   |
| CG15479        | dense    | single | yes | single   | #N/A   |
| CG5867         | dense    | single | yes | #N/A     | #N/A   |
| CG31729        | single   | #N/A   | -   | #N/A     | #N/A   |
| CG9377         | single   | #N/A   | -   | #N/A     | dense  |
| Nnp-1          | single   | #N/A   | -   | #N/A     | dense  |
| CG6523         | single   | #N/A   | -   | #N/A     | dense  |
| beta'Cop       | single   | #N/A   | -   | #N/A     | #N/A   |
| loqs           | single   | #N/A   | -   | #N/A     | #N/A   |
| CG9293         | single   | #N/A   | -   | #N/A     | #N/A   |
| CG7099         | single   | #N/A   | -   | #N/A     | #N/A   |
| RpL24          | single   | #N/A   | -   | #N/A     | #N/A   |
| CG16957        | multiple | single | yes | #N/A     | single |
| CG10859        | multiple | single | yes | #N/A     | single |
| CG7110         | single   | single | no  | #N/A     | single |
| CG16848        | single   | #N/A   | -   | #N/A     | #N/A   |
| CG16956        | single   | #N/A   | -   | #N/A     | #N/A   |
| Tehao          | single   | #N/A   | -   | #N/A     | #N/A   |
| CG31847        | single   | #N/A   | -   | #N/A     | #N/A   |

|               |          |          |     |          |          |
|---------------|----------|----------|-----|----------|----------|
| B4            | single   | multiple | yes | multiple | single   |
| kuz           | single   | multiple | yes | multiple | multiple |
| cenG1A        | multiple | multiple | yes | multiple | dense    |
| Ance-2        | single   | #N/A     | -   | #N/A     | #N/A     |
| Acyp          | single   | #N/A     | -   | #N/A     | #N/A     |
| Ance-3        | single   | #N/A     | -   | #N/A     | #N/A     |
| nimA          | single   | single   | no  | #N/A     | #N/A     |
| nimB1         | single   | single   | no  | #N/A     | #N/A     |
| nimB2         | single   | single   | no  | #N/A     | #N/A     |
| nimB3         | single   | single   | no  | #N/A     | #N/A     |
| nimB4         | single   | single   | no  | #N/A     | #N/A     |
| CG31771       | #N/A     | single   | -   | #N/A     | #N/A     |
| nAcRalpha-34E | single   | single   | no  | dense    | #N/A     |
| nimC4         | single   | single   | no  | dense    | #N/A     |
| CG16879       | single   | #N/A     | -   | #N/A     | #N/A     |
| CG15293       | single   | #N/A     | -   | #N/A     | #N/A     |
| CG31769       | single   | #N/A     | -   | #N/A     | #N/A     |
| CG32972       | single   | #N/A     | -   | #N/A     | #N/A     |
| smi35A        | multiple | #N/A     | -   | single   | #N/A     |
| wb            | dense    | dense    | yes | dense    | single   |
| I(2)34Fd      | single   | #N/A     | -   | #N/A     | single   |
| Rab14         | single   | #N/A     | -   | #N/A     | #N/A     |
| Cpr35B        | #N/A     | dense    | -   | #N/A     | #N/A     |
| CG15283       | dense    | dense    | yes | #N/A     | dense    |
| noc           | dense    | dense    | no  | dense    | #N/A     |
| tRNA:P:35Bd   | single   | single   | no  | #N/A     | #N/A     |
| tRNA:G3:35Ba  | single   | dense    | yes | #N/A     | #N/A     |
| tRNA:G3:35Bb  | #N/A     | dense    | -   | #N/A     | #N/A     |
| tRNA:G3:35Bc  | #N/A     | dense    | -   | #N/A     | #N/A     |
| CG33648       | single   | dense    | yes | #N/A     | #N/A     |
| tRNA:G3:35Bd  | #N/A     | single   | -   | #N/A     | #N/A     |
| tRNA:G3:35Be  | #N/A     | dense    | -   | #N/A     | #N/A     |
| CG4218        | single   | dense    | yes | dense    | #N/A     |
| CG3473        | #N/A     | multiple | -   | #N/A     | #N/A     |
| CG42680       | #N/A     | dense    | -   | #N/A     | #N/A     |
| tRNA:P:35Ba   | #N/A     | dense    | -   | #N/A     | #N/A     |
| osp           | multiple | multiple | no  | multiple | #N/A     |
| Adh           | single   | #N/A     | -   | single   | #N/A     |
| Adhr          | single   | #N/A     | -   | single   | #N/A     |
| CG15282       | single   | #N/A     | -   | #N/A     | #N/A     |
| ZnT35C        | single   | single   | no  | #N/A     | #N/A     |
| CG33911       | single   | single   | no  | #N/A     | #N/A     |
| nht           | multiple | multiple | yes | dense    | #N/A     |
| esg           | multiple | multiple | yes | dense    | #N/A     |
| wor           | #N/A     | multiple | -   | single   | #N/A     |
| sna           | dense    | dense    | yes | dense    | #N/A     |
| Tim17b2       | dense    | dense    | yes | dense    | #N/A     |
| lace          | multiple | single   | yes | multiple | #N/A     |
| CycE          | dense    | dense    | yes | dense    | #N/A     |
| Gli           | single   | #N/A     | -   | single   | #N/A     |
| CG3793        | single   | #N/A     | -   | #N/A     | dense    |
| beat-lb       | multiple | #N/A     | -   | #N/A     | #N/A     |
| CG4793        | single   | #N/A     | -   | #N/A     | #N/A     |

|                    |          |          |     |          |        |
|--------------------|----------|----------|-----|----------|--------|
| CG12448            | single   | #N/A     | -   | #N/A     | #N/A   |
| CG10839            | single   | #N/A     | -   | #N/A     | #N/A   |
| PRL-1              | #N/A     | single   | -   | #N/A     | #N/A   |
| EndoGI             | #N/A     | single   | -   | #N/A     | #N/A   |
| CG4935             | #N/A     | single   | -   | #N/A     | dense  |
| crp                | dense    | dense    | no  | dense    | dense  |
| pkaap              | dense    | dense    | no  | dense    | dense  |
| heix               | single   | #N/A     | -   | single   | single |
| CG17328            | single   | #N/A     | -   | single   | single |
| CG5869             | single   | #N/A     | -   | #N/A     | single |
| c(2)M              | single   | #N/A     | -   | #N/A     | single |
| cact               | dense    | single   | yes | single   | #N/A   |
| CG4278             | dense    | single   | yes | #N/A     | #N/A   |
| mRpL4              | dense    | single   | yes | #N/A     | #N/A   |
| CG4440             | single   | #N/A     | -   | #N/A     | #N/A   |
| CG31817            | single   | #N/A     | -   | single   | #N/A   |
| CG42231            | single   | #N/A     | -   | #N/A     | #N/A   |
| chif               | single   | #N/A     | -   | #N/A     | #N/A   |
| CG4455             | single   | #N/A     | -   | #N/A     | #N/A   |
| CaBP1              | single   | #N/A     | -   | #N/A     | #N/A   |
| jhamt              | multiple | #N/A     | -   | #N/A     | #N/A   |
| CG5888             | #N/A     | single   | -   | single   | #N/A   |
| dac                | multiple | single   | yes | #N/A     | #N/A   |
| CG4580             | multiple | single   | yes | #N/A     | #N/A   |
| Tpr2               | single   | single   | no  | single   | #N/A   |
| CG5953             | single   | #N/A     | -   | #N/A     | #N/A   |
| snoRNA:Me28S-C1237 | single   | #N/A     | -   | #N/A     | #N/A   |
| CG31816            | single   | #N/A     | -   | #N/A     | #N/A   |
| CG42389            | multiple | multiple | yes | single   | single |
| trpgamma           | single   | #N/A     | -   | #N/A     | #N/A   |
| her                | single   | #N/A     | -   | #N/A     | #N/A   |
| Mhc                | single   | #N/A     | -   | #N/A     | #N/A   |
| CG13280            | single   | #N/A     | -   | #N/A     | #N/A   |
| CG13272            | single   | #N/A     | -   | #N/A     | #N/A   |
| mdy                | single   | #N/A     | -   | #N/A     | #N/A   |
| CG31809            | single   | #N/A     | -   | #N/A     | #N/A   |
| CG6012             | single   | #N/A     | -   | #N/A     | #N/A   |
| CG15136            | single   | #N/A     | -   | #N/A     | #N/A   |
| CG12620            | single   | single   | no  | #N/A     | #N/A   |
| beat-IIIc          | multiple | dense    | yes | multiple | dense  |
| CG34170            | single   | #N/A     | -   | #N/A     | #N/A   |
| CG6860             | multiple | dense    | yes | dense    | single |
| CLIP-190           | multiple | dense    | yes | dense    | #N/A   |
| qua                | single   | single   | no  | single   | #N/A   |
| CG15142            | single   | single   | no  | #N/A     | #N/A   |
| CG6412             | single   | #N/A     | -   | #N/A     | #N/A   |
| Dhc36C             | single   | #N/A     | -   | #N/A     | #N/A   |
| CG15143            | single   | #N/A     | -   | #N/A     | #N/A   |
| CG15144            | single   | #N/A     | -   | #N/A     | #N/A   |
| CG7094             | #N/A     | single   | -   | #N/A     | #N/A   |
| mir-124            | #N/A     | single   | -   | #N/A     | #N/A   |
| Oli                | single   | #N/A     | -   | #N/A     | #N/A   |
| CG6870             | single   | #N/A     | -   | #N/A     | #N/A   |

|                    |          |          |     |          |          |
|--------------------|----------|----------|-----|----------|----------|
| Sytalpha           | single   | #N/A     | -   | #N/A     | #N/A     |
| CadN               | dense    | dense    | no  | multiple | multiple |
| CadN2              | #N/A     | single   | -   | #N/A     | single   |
| btv                | single   | #N/A     | -   | #N/A     | #N/A     |
| CG5674             | single   | #N/A     | -   | #N/A     | #N/A     |
| kel                | single   | #N/A     | -   | #N/A     | single   |
| Socs36E            | dense    | dense    | yes | dense    | single   |
| CG17681            | dense    | dense    | no  | #N/A     | #N/A     |
| CG15155            | dense    | dense    | no  | #N/A     | #N/A     |
| CG42400            | single   | #N/A     | -   | single   | #N/A     |
| CG5790             | #N/A     | dense    | -   | #N/A     | #N/A     |
| Fas3               | multiple | dense    | yes | multiple | dense    |
| RpS26              | single   | #N/A     | -   | #N/A     | #N/A     |
| ncm                | single   | #N/A     | -   | #N/A     | #N/A     |
| CG10283            | multiple | single   | yes | multiple | #N/A     |
| CG10176            | multiple | single   | yes | #N/A     | #N/A     |
| kon                | single   | dense    | yes | multiple | #N/A     |
| CG10178            | #N/A     | dense    | -   | #N/A     | #N/A     |
| Pde11              | single   | multiple | yes | #N/A     | #N/A     |
| CG15160            | dense    | #N/A     | -   | #N/A     | #N/A     |
| amos               | dense    | single   | yes | #N/A     | #N/A     |
| CG10413            | dense    | single   | yes | #N/A     | #N/A     |
| CG15161            | single   | single   | no  | #N/A     | #N/A     |
| MESR3              | multiple | single   | yes | #N/A     | #N/A     |
| Cyp310a1           | multiple | #N/A     | -   | #N/A     | #N/A     |
| CG15167            | single   | single   | no  | #N/A     | #N/A     |
| ham                | single   | single   | no  | multiple | #N/A     |
| CG10570            | #N/A     | dense    | -   | #N/A     | #N/A     |
| CG42502            | #N/A     | dense    | -   | #N/A     | #N/A     |
| tup                | dense    | dense    | yes | multiple | single   |
| ssp3               | multiple | multiple | yes | dense    | #N/A     |
| CG10428            | single   | single   | no  | #N/A     | single   |
| Nedd8              | single   | #N/A     | -   | #N/A     | single   |
| CG10639            | #N/A     | single   | -   | #N/A     | #N/A     |
| CG10431            | #N/A     | multiple | -   | #N/A     | #N/A     |
| CG10641            | #N/A     | multiple | -   | multiple | #N/A     |
| CG15168            | #N/A     | single   | -   | single   | #N/A     |
| CG15170            | #N/A     | single   | -   | #N/A     | #N/A     |
| CG31793            | single   | single   | no  | single   | #N/A     |
| RpL30              | single   | single   | no  | single   | #N/A     |
| snoRNA:Me28S-A2113 | single   | single   | no  | single   | #N/A     |
| rob137BC           | single   | single   | no  | #N/A     | #N/A     |
| CG31800            | #N/A     | single   | -   | #N/A     | #N/A     |
| mib2               | #N/A     | single   | -   | #N/A     | #N/A     |
| Catsup             | single   | #N/A     | -   | #N/A     | #N/A     |
| CG15173            | single   | #N/A     | -   | #N/A     | #N/A     |
| hkl                | single   | #N/A     | -   | #N/A     | dense    |
| CG10492            | single   | #N/A     | -   | #N/A     | dense    |
| Phlpp              | single   | #N/A     | -   | #N/A     | #N/A     |
| Lim3               | single   | multiple | yes | #N/A     | #N/A     |
| CG17344            | #N/A     | single   | -   | #N/A     | #N/A     |
| Aats-asn           | single   | dense    | yes | #N/A     | #N/A     |
| l(2)37Ce           | single   | dense    | yes | #N/A     | #N/A     |

|                    |          |          |     |          |          |
|--------------------|----------|----------|-----|----------|----------|
| I(2)37Cg           | single   | dense    | yes | #N/A     | #N/A     |
| brat               | dense    | dense    | no  | dense    | dense    |
| drl                | single   | dense    | yes | dense    | dense    |
| CG31797            | single   | single   | yes | #N/A     | #N/A     |
| CG17564            | #N/A     | single   | -   | #N/A     | #N/A     |
| dnt                | dense    | dense    | no  | dense    | single   |
| Pax                | #N/A     | single   | -   | #N/A     | #N/A     |
| CG13085            | #N/A     | single   | -   | #N/A     | dense    |
| CG16771            | #N/A     | single   | -   | #N/A     | dense    |
| CG10026            | #N/A     | single   | -   | single   | #N/A     |
| tj                 | single   | #N/A     | -   | #N/A     | #N/A     |
| spi                | dense    | dense    | no  | dense    | dense    |
| mir-2a-2           | dense    | dense    | no  | #N/A     | #N/A     |
| mir-2a-1           | dense    | dense    | no  | #N/A     | #N/A     |
| mir-2b-2           | dense    | dense    | no  | #N/A     | #N/A     |
| msb1l              | dense    | dense    | no  | #N/A     | dense    |
| CG10268            | dense    | dense    | no  | #N/A     | dense    |
| CdGAPr             | #N/A     | single   | -   | single   | #N/A     |
| CG10466            | #N/A     | multiple | -   | single   | #N/A     |
| fs(2)ltoPP43       | single   | multiple | yes | dense    | #N/A     |
| snRNA:U4:38AB      | multiple | single   | yes | #N/A     | dense    |
| snRNA:U5:38ABa     | single   | single   | yes | #N/A     | dense    |
| snRNA:U2:38ABb     | single   | single   | yes | #N/A     | dense    |
| CG13962            | multiple | single   | yes | #N/A     | dense    |
| snRNA:U5:38ABb     | multiple | dense    | yes | #N/A     | dense    |
| CG13958            | multiple | dense    | yes | #N/A     | #N/A     |
| sick               | multiple | dense    | yes | dense    | multiple |
| TotF               | single   | #N/A     | -   | #N/A     | #N/A     |
| Victoria           | single   | #N/A     | -   | #N/A     | #N/A     |
| CG13966            | single   | #N/A     | -   | #N/A     | #N/A     |
| barr               | single   | #N/A     | -   | #N/A     | #N/A     |
| lok                | single   | #N/A     | -   | #N/A     | #N/A     |
| vls                | single   | #N/A     | -   | #N/A     | #N/A     |
| CG12617            | #N/A     | single   | -   | #N/A     | #N/A     |
| spir               | #N/A     | single   | -   | multiple | single   |
| La                 | single   | single   | no  | #N/A     | single   |
| rtGEF              | multiple | single   | -   | single   | single   |
| snoRNA:Me28S-A3365 | single   | single   | no  | #N/A     | #N/A     |
| CG31683            | single   | #N/A     | -   | #N/A     | #N/A     |
| CG31687            | single   | #N/A     | -   | #N/A     | #N/A     |
| CG18858            | single   | #N/A     | -   | #N/A     | #N/A     |
| cdc23              | single   | #N/A     | -   | #N/A     | #N/A     |
| CG2493             | single   | #N/A     | -   | #N/A     | #N/A     |
| mir-1              | #N/A     | multiple | -   | #N/A     | #N/A     |
| CG34007            | single   | multiple | yes | multiple | #N/A     |
| CG9318             | single   | single   | no  | #N/A     | #N/A     |
| Fs(2)Ket           | single   | single   | no  | single   | #N/A     |
| dia                | dense    | single   | yes | single   | #N/A     |
| cad                | dense    | single   | yes | multiple | #N/A     |
| vari               | single   | dense    | yes | multiple | single   |
| CG9328             | single   | dense    | yes | multiple | single   |
| CheB38c            | single   | single   | yes | #N/A     | #N/A     |
| CG9331             | single   | single   | yes | #N/A     | #N/A     |

|            |          |          |     |          |        |
|------------|----------|----------|-----|----------|--------|
| CG9339     | single   | single   | no  | #N/A     | #N/A   |
| Mtp        | single   | single   | yes | single   | #N/A   |
| CR33319    | #N/A     | single   | -   | #N/A     | #N/A   |
| CG9270     | #N/A     | single   | -   | #N/A     | #N/A   |
| CG42238    | multiple | dense    | yes | dense    | dense  |
| betaInt-nu | single   | #N/A     | -   | dense    | dense  |
| CG9265     | #N/A     | single   | -   | #N/A     | #N/A   |
| tadr       | #N/A     | single   | -   | #N/A     | #N/A   |
| CG14397    | single   | single   | no  | #N/A     | #N/A   |
| CG12050    | single   | single   | no  | single   | #N/A   |
| CG34136    | single   | single   | no  | #N/A     | #N/A   |
| CG9257     | single   | #N/A     | -   | single   | #N/A   |
| Nhe2       | multiple | #N/A     | -   | #N/A     | #N/A   |
| Dap160     | single   | #N/A     | -   | #N/A     | #N/A   |
| Ret        | single   | single   | no  | #N/A     | #N/A   |
| CG8678     | single   | #N/A     | -   | single   | #N/A   |
| CG8679     | single   | #N/A     | -   | single   | #N/A   |
| CG8677     | dense    | #N/A     | -   | #N/A     | #N/A   |
| CG31626    | dense    | single   | yes | single   | #N/A   |
| Hr39       | dense    | multiple | yes | single   | single |
| CG8671     | single   | #N/A     | -   | #N/A     | #N/A   |
| Mio        | single   | single   | no  | single   | #N/A   |
| crc        | single   | single   | no  | dense    | #N/A   |
| Tsp39D     | multiple | single   | yes | multiple | #N/A   |
| Gr39b      | single   | #N/A     | -   | #N/A     | #N/A   |
| CG8665     | single   | #N/A     | -   | #N/A     | #N/A   |
| CG3305     | single   | #N/A     | -   | #N/A     | #N/A   |
| CG2201     | single   | #N/A     | -   | #N/A     | #N/A   |
| Df31       | single   | multiple | yes | single   | single |
| Ac3        | single   | multiple | yes | multiple | single |
| CG31619    | single   | #N/A     | -   | dense    | #N/A   |
| step       | single   | single   | no  | multiple | single |
| CG31612    | #N/A     | multiple | -   | multiple | single |
| CG11630    | #N/A     | single   | -   | single   | #N/A   |
| tsh        | multiple | dense    | yes | single   | #N/A   |
| CG11629    | multiple | dense    | yes | #N/A     | #N/A   |
| CG1421     | single   | dense    | yes | #N/A     | #N/A   |
| CG31693    | single   | single   | no  | dense    | #N/A   |
| CR33987    | multiple | single   | yes | #N/A     | #N/A   |
| tio        | multiple | multiple | no  | dense    | #N/A   |
| CG41434    | single   | #N/A     | -   | #N/A     | #N/A   |
| CG34173    | single   | #N/A     | -   | #N/A     | #N/A   |
| CG6448     | multiple | #N/A     | -   | single   | #N/A   |
| CG34137    | single   | #N/A     | -   | #N/A     | #N/A   |
| CG15216    | single   | #N/A     | -   | #N/A     | #N/A   |
| CG1832     | single   | #N/A     | -   | single   | #N/A   |
| RpL21      | single   | #N/A     | -   | single   | #N/A   |
| Tif-1A     | single   | #N/A     | -   | #N/A     | #N/A   |
| CG17018    | single   | #N/A     | -   | #N/A     | #N/A   |
| CG40439    | multiple | #N/A     | -   | #N/A     | #N/A   |
| CG17715    | single   | #N/A     | -   | #N/A     | #N/A   |
| Cht3       | single   | #N/A     | -   | single   | #N/A   |
| RpL38      | multiple | #N/A     | -   | #N/A     | #N/A   |



|              |          |          |     |          |        |
|--------------|----------|----------|-----|----------|--------|
| CG17486      | single   | #N/A     | -   | #N/A     | #N/A   |
| Nipped-B     | multiple | #N/A     | -   | #N/A     | #N/A   |
| Ir41a        | single   | #N/A     | -   | single   | #N/A   |
| Atf6         | single   | #N/A     | -   | #N/A     | #N/A   |
| CG10417      | single   | #N/A     | -   | #N/A     | #N/A   |
| CR42646      | single   | #N/A     | -   | #N/A     | #N/A   |
| CG30438      | single   | #N/A     | -   | #N/A     | #N/A   |
| scarface     | single   | #N/A     | -   | #N/A     | #N/A   |
| CG17337      | single   | #N/A     | -   | single   | #N/A   |
| vlc          | single   | multiple | yes | #N/A     | #N/A   |
| ap           | multiple | dense    | yes | dense    | single |
| gp210        | single   | #N/A     | -   | #N/A     | #N/A   |
| CG11163      | single   | single   | no  | multiple | #N/A   |
| Or42b        | single   | #N/A     | -   | #N/A     | #N/A   |
| CG14470      | single   | #N/A     | -   | #N/A     | #N/A   |
| Src42A       | single   | #N/A     | -   | #N/A     | #N/A   |
| PNGase       | multiple | single   | yes | single   | #N/A   |
| Act42A       | single   | single   | no  | single   | #N/A   |
| dream        | single   | #N/A     | -   | #N/A     | #N/A   |
| SCAP         | single   | #N/A     | -   | #N/A     | single |
| CG14591      | single   | #N/A     | -   | #N/A     | single |
| CG7843       | multiple | #N/A     | -   | #N/A     | #N/A   |
| EcR          | multiple | dense    | yes | dense    | dense  |
| CG14589      | #N/A     | dense    | -   | #N/A     | #N/A   |
| tRNA:N5:42Ah | single   | #N/A     | -   | #N/A     | #N/A   |
| tRNA:N5:42Ag | single   | #N/A     | -   | #N/A     | #N/A   |
| tRNA:N5:42Af | single   | #N/A     | -   | #N/A     | #N/A   |
| Ptr          | dense    | dense    | no  | single   | single |
| tRNA:N5:42Ae | single   | #N/A     | -   | #N/A     | #N/A   |
| tRNA:N5:42Ad | single   | #N/A     | -   | #N/A     | #N/A   |
| CG30432      | dense    | dense    | yes | #N/A     | single |
| bin3         | multiple | multiple | no  | single   | single |
| tomboy40     | single   | #N/A     | -   | #N/A     | #N/A   |
| jing         | dense    | dense    | yes | dense    | dense  |
| CG15233      | multiple | dense    | yes | dense    | single |
| CG15234      | multiple | dense    | yes | dense    | #N/A   |
| Vha16        | #N/A     | single   | -   | single   | #N/A   |
| sced         | multiple | single   | yes | #N/A     | #N/A   |
| Dpit47       | multiple | single   | yes | #N/A     | #N/A   |
| Adf1         | multiple | single   | yes | #N/A     | #N/A   |
| CG3409       | single   | multiple | yes | single   | dense  |
| l(2)01289    | single   | single   | no  | #N/A     | #N/A   |
| phtf         | single   | single   | no  | #N/A     | dense  |
| CG3267       | #N/A     | single   | -   | #N/A     | dense  |
| Eb1          | #N/A     | single   | -   | single   | dense  |
| Epac         | #N/A     | multiple | -   | single   | #N/A   |
| SdhB         | single   | #N/A     | -   | #N/A     | #N/A   |
| CG15237      | single   | #N/A     | -   | #N/A     | #N/A   |
| ubl          | single   | #N/A     | -   | #N/A     | #N/A   |
| CG3287       | single   | #N/A     | -   | #N/A     | #N/A   |
| coro         | single   | #N/A     | -   | single   | #N/A   |
| CG9447       | single   | #N/A     | -   | single   | #N/A   |
| Spn4         | single   | #N/A     | -   | #N/A     | #N/A   |

|                 |          |          |     |          |          |
|-----------------|----------|----------|-----|----------|----------|
| CG9455          | single   | #N/A     | -   | #N/A     | #N/A     |
| Spn1            | single   | #N/A     | -   | #N/A     | #N/A     |
| CG9460          | single   | #N/A     | -   | #N/A     | #N/A     |
| vimar           | single   | multiple | yes | single   | #N/A     |
| CG30156         | single   | multiple | yes | #N/A     | #N/A     |
| CG17002         | single   | multiple | yes | single   | #N/A     |
| Tsp42Ea         | single   | single   | no  | #N/A     | #N/A     |
| CG30159         | single   | single   | no  | #N/A     | #N/A     |
| Tsp42Ed         | single   | single   | no  | single   | #N/A     |
| Tsp42Ee         | single   | single   | no  | single   | #N/A     |
| esn             | single   | #N/A     | -   | single   | single   |
| pwn             | single   | #N/A     | -   | #N/A     | #N/A     |
| Dscam           | dense    | multiple | yes | multiple | dense    |
| cos             | single   | multiple | yes | multiple | dense    |
| Eaf             | single   | #N/A     | -   | single   | #N/A     |
| CG11112         | single   | #N/A     | -   | #N/A     | #N/A     |
| CG11113         | single   | #N/A     | -   | #N/A     | #N/A     |
| so              | single   | dense    | yes | dense    | multiple |
| CG11145         | #N/A     | dense    | -   | dense    | #N/A     |
| CG11141         | single   | #N/A     | -   | #N/A     | #N/A     |
| CG11127         | single   | #N/A     | -   | #N/A     | #N/A     |
| p47             | single   | #N/A     | -   | #N/A     | #N/A     |
| Aldh-III        | single   | #N/A     | -   | single   | #N/A     |
| wech            | dense    | dense    | yes | single   | dense    |
| CG1621          | dense    | dense    | yes | #N/A     | dense    |
| CG1620          | dense    | dense    | yes | #N/A     | dense    |
| Corin           | single   | single   | no  | #N/A     | #N/A     |
| CG30499         | single   | single   | no  | #N/A     | #N/A     |
| blow            | single   | single   | no  | #N/A     | #N/A     |
| CG1360          | single   | single   | no  | #N/A     | #N/A     |
| scra            | #N/A     | single   | -   | #N/A     | #N/A     |
| CG18812         | single   | #N/A     | -   | #N/A     | #N/A     |
| CG30497         | single   | #N/A     | -   | multiple | #N/A     |
| CG2915          | single   | #N/A     | -   | #N/A     | #N/A     |
| 40791           | single   | #N/A     | -   | #N/A     | #N/A     |
| nito            | single   | #N/A     | -   | #N/A     | #N/A     |
| Optix           | single   | multiple | yes | #N/A     | #N/A     |
| CG12769         | multiple | multiple | yes | #N/A     | #N/A     |
| CG17977         | #N/A     | single   | -   | #N/A     | #N/A     |
| lig             | #N/A     | single   | -   | #N/A     | #N/A     |
| kermit          | single   | single   | no  | single   | #N/A     |
| CG30374         | single   | single   | no  | #N/A     | #N/A     |
| CG8708          | single   | #N/A     | -   | #N/A     | #N/A     |
| RagC            | single   | #N/A     | -   | #N/A     | #N/A     |
| CG30373         | single   | #N/A     | -   | #N/A     | #N/A     |
| Rs1             | single   | #N/A     | -   | #N/A     | #N/A     |
| snoRNA:MeU6-C68 | single   | #N/A     | -   | #N/A     | #N/A     |
| CG33087         | single   | single   | no  | #N/A     | #N/A     |
| CG34217         | single   | single   | no  | single   | single   |
| dpn             | multiple | multiple | yes | #N/A     | single   |
| pnut            | multiple | dense    | yes | #N/A     | dense    |
| CG14760         | dense    | dense    | yes | #N/A     | #N/A     |
| CR30370         | single   | #N/A     | -   | #N/A     | #N/A     |

|                     |          |          |     |        |        |
|---------------------|----------|----------|-----|--------|--------|
| CG2121              | single   | #N/A     | -   | #N/A   | single |
| CG12780             | single   | #N/A     | -   | #N/A   | #N/A   |
| Cyp6a14             | single   | #N/A     | -   | #N/A   | #N/A   |
| ptc                 | dense    | dense    | no  | dense  | dense  |
| l(2)44DEa           | #N/A     | single   | -   | #N/A   | #N/A   |
| CG14767             | single   | single   | no  | #N/A   | #N/A   |
| CG30357             | single   | single   | no  | #N/A   | #N/A   |
| gcl                 | single   | single   | no  | #N/A   | #N/A   |
| sns                 | multiple | multiple | yes | #N/A   | #N/A   |
| CG30350             | single   | #N/A     | -   | #N/A   | #N/A   |
| CG34350             | single   | single   | no  | #N/A   | #N/A   |
| CG8172              | single   | single   | no  | #N/A   | single |
| CG8080              | single   | #N/A     | -   | #N/A   | #N/A   |
| CG13741             | single   | #N/A     | -   | #N/A   | #N/A   |
| Uhg4                | single   | #N/A     | -   | #N/A   | #N/A   |
| snoRNA:Psi28S-2949  | single   | #N/A     | -   | #N/A   | #N/A   |
| snoRNA:Or-aca5      | single   | #N/A     | -   | #N/A   | #N/A   |
| snoRNA:Me28S-G3255a | single   | #N/A     | -   | #N/A   | #N/A   |
| snoRNA:Me28S-A982a  | single   | #N/A     | -   | #N/A   | #N/A   |
| snoRNA:Me28S-A982b  | single   | #N/A     | -   | #N/A   | #N/A   |
| snoRNA:Me28S-G3255b | single   | #N/A     | -   | #N/A   | #N/A   |
| CG8078              | single   | #N/A     | -   | #N/A   | #N/A   |
| snoRNA:Or-CD2       | single   | #N/A     | -   | #N/A   | #N/A   |
| Hydr1               | multiple | single   | yes | #N/A   | single |
| alc                 | multiple | single   | yes | #N/A   | single |
| CG8788              | multiple | single   | yes | single | single |
| shrb                | multiple | single   | yes | #N/A   | #N/A   |
| CG8046              | single   | #N/A     | -   | #N/A   | #N/A   |
| Rad51C              | single   | #N/A     | -   | #N/A   | #N/A   |
| CG42382             | single   | #N/A     | -   | #N/A   | #N/A   |
| Rme-8               | single   | #N/A     | -   | #N/A   | #N/A   |
| CG8027              | single   | single   | no  | #N/A   | #N/A   |
| l(2)k10201          | #N/A     | dense    | -   | dense  | #N/A   |
| CG33774             | #N/A     | dense    | -   | #N/A   | #N/A   |
| wun                 | #N/A     | dense    | -   | dense  | #N/A   |
| wun2                | #N/A     | single   | -   | single | #N/A   |
| ced-6               | #N/A     | single   | -   | single | #N/A   |
| Wnt2                | #N/A     | multiple | -   | dense  | #N/A   |
| CG1888              | #N/A     | multiple | -   | #N/A   | #N/A   |
| Not1                | single   | single   | no  | #N/A   | #N/A   |
| CG1814              | single   | single   | no  | #N/A   | #N/A   |
| CG1868              | multiple | multiple | no  | #N/A   | #N/A   |
| Updo                | single   | single   | no  | #N/A   | #N/A   |
| CG12929             | single   | single   | no  | single | #N/A   |
| RpL31               | single   | single   | no  | single | #N/A   |
| CG42600             | single   | single   | no  | single | #N/A   |
| CG1827              | single   | single   | no  | #N/A   | #N/A   |
| Mmp2                | multiple | multiple | no  | single | single |
| tRNA:M3:46A         | single   | single   | yes | #N/A   | #N/A   |
| Uba1                | dense    | dense    | yes | single | #N/A   |
| CG30002             | dense    | dense    | no  | dense  | #N/A   |
| CG1773              | dense    | dense    | yes | dense  | #N/A   |
| CG10459             | dense    | dense    | no  | dense  | #N/A   |

|            |          |          |     |          |        |
|------------|----------|----------|-----|----------|--------|
| dap        | dense    | dense    | no  | dense    | #N/A   |
| CG42347    | single   | dense    | yes | #N/A     | #N/A   |
| cbx        | single   | #N/A     | -   | multiple | #N/A   |
| CG18446    | single   | #N/A     | -   | multiple | #N/A   |
| CG12744    | single   | #N/A     | -   | #N/A     | #N/A   |
| sec24      | single   | #N/A     | -   | #N/A     | #N/A   |
| CG12140    | single   | dense    | yes | #N/A     | #N/A   |
| Mef2       | multiple | dense    | yes | dense    | #N/A   |
| CG15863    | single   | single   | no  | #N/A     | #N/A   |
| CG12130    | single   | single   | no  | #N/A     | #N/A   |
| CG1418     | single   | #N/A     | -   | #N/A     | #N/A   |
| CG12133    | single   | #N/A     | -   | #N/A     | #N/A   |
| Adam       | single   | #N/A     | -   | #N/A     | #N/A   |
| CG12134    | dense    | #N/A     | -   | #N/A     | #N/A   |
| eve        | dense    | single   | yes | #N/A     | #N/A   |
| TER94      | dense    | dense    | yes | dense    | #N/A   |
| magu       | #N/A     | multiple | -   | dense    | #N/A   |
| Def        | #N/A     | multiple | -   | dense    | #N/A   |
| CG1371     | single   | #N/A     | -   | #N/A     | #N/A   |
| egr        | single   | #N/A     | -   | single   | #N/A   |
| 14-3-3zeta | single   | #N/A     | -   | #N/A     | #N/A   |
| Pfk        | single   | #N/A     | -   | #N/A     | #N/A   |
| Hr46       | #N/A     | multiple | -   | single   | #N/A   |
| Hdc        | #N/A     | single   | -   | multiple | #N/A   |
| CG12914    | single   | single   | no  | #N/A     | #N/A   |
| CG12913    | single   | single   | no  | single   | single |
| Syb        | single   | single   | no  | single   | single |
| CG12911    | #N/A     | multiple | -   | #N/A     | single |
| CR30009    | #N/A     | multiple | -   | #N/A     | #N/A   |
| CG12910    | single   | multiple | -   | #N/A     | #N/A   |
| CAP        | single   | single   | no  | single   | #N/A   |
| Ndg        | multiple | single   | yes | single   | single |
| CG34222    | single   | #N/A     | -   | #N/A     | #N/A   |
| CG34363    | single   | #N/A     | -   | #N/A     | #N/A   |
| Prx2540-2  | #N/A     | single   | -   | single   | #N/A   |
| CG11825    | #N/A     | multiple | -   | single   | #N/A   |
| CG33474    | #N/A     | multiple | -   | single   | #N/A   |
| Prx2540-1  | #N/A     | multiple | -   | #N/A     | #N/A   |
| CG12896    | single   | multiple | yes | #N/A     | dense  |
| RanBPM     | single   | single   | yes | #N/A     | dense  |
| CPTI       | #N/A     | multiple | -   | single   | #N/A   |
| trsn       | #N/A     | multiple | -   | #N/A     | #N/A   |
| CG17765    | multiple | multiple | yes | #N/A     | dense  |
| lola       | multiple | dense    | yes | dense    | dense  |
| psq        | multiple | multiple | no  | dense    | dense  |
| CG11883    | single   | #N/A     | -   | #N/A     | #N/A   |
| Git        | #N/A     | single   | -   | #N/A     | #N/A   |
| StIP       | #N/A     | single   | -   | #N/A     | #N/A   |
| CG33144    | #N/A     | single   | -   | #N/A     | #N/A   |
| CG12340    | multiple | #N/A     | -   | dense    | #N/A   |
| CG12935    | multiple | single   | yes | dense    | #N/A   |
| CG7637     | multiple | single   | yes | dense    | #N/A   |
| mms4       | multiple | single   | yes | dense    | #N/A   |

|                    |          |          |     |          |        |
|--------------------|----------|----------|-----|----------|--------|
| CG12341            | multiple | single   | yes | dense    | #N/A   |
| CG7222             | single   | single   | no  | dense    | #N/A   |
| dgo                | single   | single   | no  | single   | #N/A   |
| CG7686             | single   | single   | no  | #N/A     | #N/A   |
| CG30015            | multiple | multiple | no  | multiple | single |
| CG30016            | single   | single   | no  | single   | #N/A   |
| CG6751             | single   | single   | no  | single   | #N/A   |
| Taf5               | single   | single   | no  | #N/A     | #N/A   |
| CG11919            | single   | #N/A     | -   | #N/A     | #N/A   |
| CG18003            | single   | #N/A     | -   | #N/A     | #N/A   |
| CG18004            | single   | #N/A     | -   | #N/A     | #N/A   |
| CG30020            | single   | #N/A     | -   | #N/A     | #N/A   |
| luna               | multiple | dense    | yes | multiple | single |
| CG13229            | single   | #N/A     | -   | #N/A     | #N/A   |
| CG13231            | single   | #N/A     | -   | #N/A     | #N/A   |
| CG12391            | multiple | #N/A     | -   | #N/A     | #N/A   |
| CG13230            | single   | #N/A     | -   | #N/A     | #N/A   |
| shn                | dense    | dense    | no  | dense    | dense  |
| CG7737             | #N/A     | single   | -   | #N/A     | single |
| skf                | #N/A     | single   | -   | #N/A     | #N/A   |
| CG13228            | #N/A     | single   | -   | #N/A     | #N/A   |
| CG13227            | single   | single   | no  | #N/A     | #N/A   |
| CG34223            | single   | single   | no  | #N/A     | #N/A   |
| CG13217            | single   | single   | no  | multiple | #N/A   |
| CG34224            | single   | single   | no  | multiple | #N/A   |
| CG13216            | single   | single   | no  | #N/A     | #N/A   |
| CG13215            | single   | single   | no  | #N/A     | #N/A   |
| CG7741             | #N/A     | single   | -   | single   | dense  |
| Obp47b             | #N/A     | single   | -   | #N/A     | dense  |
| Fpps               | #N/A     | single   | -   | #N/A     | dense  |
| CG7745             | #N/A     | single   | -   | #N/A     | dense  |
| betaTry            | single   | #N/A     | -   | #N/A     | single |
| gammaTry           | single   | #N/A     | -   | #N/A     | single |
| CG30031            | single   | #N/A     | -   | #N/A     | single |
| CG13204            | single   | #N/A     | -   | #N/A     | #N/A   |
| Tapdelta           | single   | #N/A     | -   | #N/A     | #N/A   |
| CG9027             | single   | single   | no  | #N/A     | #N/A   |
| sprt               | dense    | dense    | yes | dense    | dense  |
| CG30022            | #N/A     | single   | -   | #N/A     | #N/A   |
| tRNA:CR30257       | dense    | dense    | yes | #N/A     | #N/A   |
| tRNA:CR30506       | dense    | dense    | yes | #N/A     | #N/A   |
| CG7759             | single   | dense    | yes | #N/A     | #N/A   |
| qvr                | single   | #N/A     | -   | #N/A     | #N/A   |
| E(Pc)              | single   | #N/A     | -   | #N/A     | #N/A   |
| inv                | #N/A     | single   | -   | multiple | #N/A   |
| en                 | dense    | dense    | yes | dense    | #N/A   |
| tou                | dense    | dense    | no  | dense    | #N/A   |
| snoRNA:Psi28S-1180 | dense    | dense    | no  | #N/A     | #N/A   |
| CG9003             | #N/A     | single   | -   | dense    | #N/A   |
| tRNA:CR30254       | #N/A     | single   | -   | #N/A     | #N/A   |
| pyr                | multiple | multiple | yes | #N/A     | dense  |
| Tango3             | dense    | dense    | yes | single   | single |
| ths                | dense    | dense    | no  | dense    | single |

|                    |          |          |     |          |          |
|--------------------|----------|----------|-----|----------|----------|
| CG13192            | single   | single   | no  | #N/A     | #N/A     |
| Sobp               | single   | multiple | yes | single   | #N/A     |
| CG34229            | #N/A     | single   | -   | #N/A     | #N/A     |
| S2P                | single   | single   | no  | #N/A     | #N/A     |
| Sln                | single   | single   | no  | #N/A     | #N/A     |
| CG42531            | single   | #N/A     | -   | #N/A     | #N/A     |
| Damm               | single   | #N/A     | -   | #N/A     | #N/A     |
| CR42532            | single   | #N/A     | -   | #N/A     | #N/A     |
| CG13185            | single   | #N/A     | -   | multiple | #N/A     |
| ERp60              | multiple | single   | yes | #N/A     | dense    |
| Ef1alpha48D        | multiple | single   | yes | single   | dense    |
| snoRNA:Me28S-A1322 | multiple | single   | yes | #N/A     | dense    |
| MCPH1              | multiple | single   | yes | #N/A     | dense    |
| CG30037            | single   | #N/A     | -   | #N/A     | #N/A     |
| CG33145            | single   | #N/A     | -   | #N/A     | #N/A     |
| RnrS               | single   | #N/A     | -   | #N/A     | #N/A     |
| otk                | #N/A     | multiple | -   | multiple | dense    |
| CG8964             | #N/A     | single   | -   | dense    | dense    |
| CG8889             | #N/A     | single   | -   | dense    | dense    |
| pds5               | #N/A     | single   | -   | dense    | dense    |
| jeb                | single   | multiple | yes | #N/A     | single   |
| Oda                | multiple | single   | yes | #N/A     | #N/A     |
| Smd3               | multiple | single   | yes | #N/A     | #N/A     |
| mir-281b           | multiple | single   | yes | #N/A     | #N/A     |
| mir-281bS          | multiple | single   | yes | #N/A     | #N/A     |
| mir-281a           | multiple | single   | yes | #N/A     | #N/A     |
| mir-281aS          | multiple | single   | yes | #N/A     | #N/A     |
| Cct5               | multiple | single   | yes | #N/A     | #N/A     |
| EndoG              | single   | #N/A     | -   | #N/A     | #N/A     |
| CG8860             | single   | #N/A     | -   | #N/A     | #N/A     |
| wash               | single   | #N/A     | -   | #N/A     | #N/A     |
| CG13175            | single   | #N/A     | -   | #N/A     | #N/A     |
| CG33964            | single   | #N/A     | -   | #N/A     | #N/A     |
| CG13167            | single   | single   | no  | #N/A     | single   |
| Cam                | single   | single   | no  | single   | single   |
| ana3               | single   | #N/A     | -   | #N/A     | #N/A     |
| CG30047            | single   | #N/A     | -   | #N/A     | #N/A     |
| CG30049            | single   | #N/A     | -   | #N/A     | #N/A     |
| Dyb                | dense    | dense    | yes | dense    | single   |
| Lac                | dense    | dense    | yes | dense    | multiple |
| dgt5               | single   | dense    | yes | single   | #N/A     |
| fdl                | single   | #N/A     | -   | #N/A     | #N/A     |
| vis                | single   | #N/A     | -   | #N/A     | #N/A     |
| fra                | multiple | multiple | yes | multiple | #N/A     |
| CG33752            | single   | multiple | yes | #N/A     | #N/A     |
| Sin3A              | single   | single   | no  | dense    | #N/A     |
| CG30055            | single   | single   | no  | dense    | #N/A     |
| CG8776             | single   | #N/A     | -   | #N/A     | #N/A     |
| sca                | single   | dense    | yes | dense    | #N/A     |
| CG17574            | multiple | #N/A     | -   | #N/A     | #N/A     |
| Aats-asp           | single   | single   | no  | single   | #N/A     |
| vg                 | single   | multiple | yes | multiple | #N/A     |
| NAT1               | #N/A     | single   | -   | dense    | #N/A     |

|                    |          |          |     |          |        |
|--------------------|----------|----------|-----|----------|--------|
| CG13321            | dense    | dense    | no  | #N/A     | #N/A   |
| Psc                | multiple | dense    | yes | dense    | single |
| CG33798            | single   | single   | no  | dense    | #N/A   |
| Su(z)2             | multiple | multiple | yes | dense    | #N/A   |
| CG13323            | #N/A     | single   | -   | #N/A     | #N/A   |
| Drl-2              | single   | #N/A     | -   | #N/A     | #N/A   |
| PR2                | single   | single   | no  | #N/A     | #N/A   |
| TppII              | single   | single   | no  | #N/A     | #N/A   |
| CG17724            | #N/A     | dense    | -   | #N/A     | #N/A   |
| seq                | single   | dense    | yes | dense    | dense  |
| Kdm4B              | multiple | dense    | yes | dense    | dense  |
| Aats-val           | single   | dense    | yes | #N/A     | dense  |
| CG4646             | #N/A     | dense    | -   | #N/A     | #N/A   |
| CG17059            | #N/A     | dense    | -   | #N/A     | #N/A   |
| Fsn                | single   | dense    | yes | dense    | #N/A   |
| Dp                 | single   | dense    | yes | dense    | single |
| CG4663             | #N/A     | dense    | -   | #N/A     | #N/A   |
| mir-184S           | single   | multiple | yes | #N/A     | #N/A   |
| CG17048            | multiple | multiple | yes | #N/A     | #N/A   |
| CG42321            | single   | #N/A     | -   | #N/A     | single |
| tRNA:CR30509       | single   | #N/A     | -   | #N/A     | #N/A   |
| cnn                | multiple | single   | yes | single   | #N/A   |
| cbs                | single   | single   | no  | single   | #N/A   |
| arr                | single   | single   | no  | multiple | dense  |
| cid                | single   | #N/A     | -   | #N/A     | dense  |
| bbc                | single   | #N/A     | -   | #N/A     | dense  |
| CG6145             | single   | single   | no  | single   | #N/A   |
| CG33156            | #N/A     | dense    | -   | #N/A     | #N/A   |
| Roe1               | #N/A     | dense    | -   | dense    | #N/A   |
| CG13333            | dense    | dense    | yes | dense    | #N/A   |
| snoRNA:Psi28S-1153 | dense    | dense    | yes | #N/A     | #N/A   |
| CG13334            | dense    | dense    | no  | dense    | #N/A   |
| CG13335            | dense    | dense    | no  | dense    | #N/A   |
| CG6191             | dense    | dense    | yes | dense    | dense  |
| CG6197             | single   | single   | no  | #N/A     | #N/A   |
| fas                | dense    | dense    | no  | dense    | #N/A   |
| CG13337            | single   | single   | yes | #N/A     | #N/A   |
| CG18368            | single   | single   | yes | #N/A     | #N/A   |
| stj                | multiple | single   | yes | #N/A     | #N/A   |
| fl(2)d             | single   | #N/A     | -   | #N/A     | #N/A   |
| CG6329             | #N/A     | single   | -   | single   | #N/A   |
| shot               | multiple | multiple | no  | dense    | dense  |
| DJ-1alpha          | single   | single   | no  | single   | dense  |
| AGO1               | single   | #N/A     | -   | #N/A     | dense  |
| CG13349            | single   | #N/A     | -   | #N/A     | #N/A   |
| Cp1                | multiple | single   | yes | single   | #N/A   |
| Aats-phe           | single   | single   | no  | #N/A     | #N/A   |
| RN-tre             | single   | multiple | yes | dense    | single |
| mam                | multiple | multiple | yes | dense    | dense  |
| CG30482            | single   | #N/A     | -   | multiple | #N/A   |
| Prosap             | single   | #N/A     | -   | multiple | dense  |
| CG8331             | single   | single   | no  | #N/A     | #N/A   |
| mRpS16             | single   | single   | no  | #N/A     | #N/A   |

|                     |          |          |     |          |          |
|---------------------|----------|----------|-----|----------|----------|
| cg                  | single   | single   | no  | #N/A     | #N/A     |
| CG8468              | #N/A     | single   | -   | dense    | #N/A     |
| lh                  | #N/A     | single   | -   | #N/A     | #N/A     |
| Shroom              | multiple | multiple | yes | dense    | #N/A     |
| CG8613              | single   | #N/A     | -   | #N/A     | #N/A     |
| CG8617              | single   | #N/A     | -   | #N/A     | #N/A     |
| Arc1                | single   | #N/A     | -   | #N/A     | #N/A     |
| CG10102             | single   | #N/A     | -   | #N/A     | #N/A     |
| phyl                | dense    | dense    | no  | dense    | dense    |
| Oaz                 | #N/A     | single   | -   | single   | dense    |
| L                   | single   | single   | no  | dense    | multiple |
| Sec61beta           | single   | #N/A     | -   | #N/A     | #N/A     |
| CG12863             | single   | #N/A     | -   | #N/A     | #N/A     |
| Uhg5                | single   | #N/A     | -   | #N/A     | #N/A     |
| snoRNA:Me18S-C1366  | single   | #N/A     | -   | #N/A     | #N/A     |
| snoRNA:Me28S-C3227a | single   | #N/A     | -   | #N/A     | #N/A     |
| snoRNA:Me28S-C3227b | single   | #N/A     | -   | #N/A     | #N/A     |
| snoRNA:Me28S-U1848  | single   | #N/A     | -   | #N/A     | #N/A     |
| snoRNA:Me18S-G1952  | single   | #N/A     | -   | #N/A     | #N/A     |
| snoRNA:Me18S-A1061  | single   | #N/A     | -   | #N/A     | #N/A     |
| snoRNA:Me28S-A992   | single   | #N/A     | -   | #N/A     | #N/A     |
| snoRNA:Me28S-G2703a | single   | #N/A     | -   | #N/A     | #N/A     |
| snoRNA:Me28S-G2703b | single   | #N/A     | -   | #N/A     | #N/A     |
| snoRNA:Me28S-G2703c | single   | #N/A     | -   | #N/A     | #N/A     |
| snoRNA:Or-CD4       | single   | #N/A     | -   | #N/A     | #N/A     |
| CG10131             | single   | single   | no  | #N/A     | #N/A     |
| mspo                | #N/A     | single   | -   | single   | #N/A     |
| Rpn6                | single   | #N/A     | -   | #N/A     | #N/A     |
| ave                 | single   | #N/A     | -   | #N/A     | #N/A     |
| CG10151             | single   | #N/A     | -   | #N/A     | #N/A     |
| CG12859             | single   | #N/A     | -   | #N/A     | #N/A     |
| CG10153             | single   | #N/A     | -   | #N/A     | #N/A     |
| CG12857             | single   | #N/A     | -   | #N/A     | #N/A     |
| kn                  | multiple | multiple | yes | multiple | single   |
| Pcf11               | single   | #N/A     | -   | #N/A     | #N/A     |
| Cyp6a22             | single   | #N/A     | -   | #N/A     | #N/A     |
| Cyp6a17             | single   | #N/A     | -   | #N/A     | #N/A     |
| aPKC                | single   | single   | no  | dense    | single   |
| CG12424             | dense    | multiple | yes | dense    | multiple |
| pcs                 | dense    | multiple | yes | #N/A     | single   |
| tRNA:CR30241        | dense    | multiple | yes | #N/A     | #N/A     |
| CG7639              | single   | single   | no  | #N/A     | #N/A     |
| hbs                 | dense    | dense    | no  | multiple | #N/A     |
| Obp51a              | #N/A     | single   | -   | #N/A     | #N/A     |
| CG33467             | single   | single   | no  | #N/A     | #N/A     |
| chn                 | multiple | dense    | yes | dense    | dense    |
| igl                 | multiple | #N/A     | -   | #N/A     | #N/A     |
| row                 | single   | #N/A     | -   | #N/A     | #N/A     |
| CG8093              | single   | #N/A     | -   | #N/A     | #N/A     |
| CG11808             | single   | #N/A     | -   | #N/A     | #N/A     |
| mRpl41              | single   | #N/A     | -   | #N/A     | #N/A     |
| scb                 | single   | single   | no  | dense    | #N/A     |
| CG8152              | single   | #N/A     | -   | dense    | #N/A     |



|              |          |          |     |          |        |
|--------------|----------|----------|-----|----------|--------|
| mus210       | single   | #N/A     | -   | dense    | #N/A   |
| CG8155       | single   | single   | no  | #N/A     | #N/A   |
| Arf51F       | single   | single   | no  | #N/A     | #N/A   |
| CG8157       | single   | single   | no  | #N/A     | #N/A   |
| CG8160       | single   | single   | no  | #N/A     | #N/A   |
| Hr51         | multiple | single   | yes | #N/A     | #N/A   |
| unc-5        | dense    | dense    | no  | dense    | dense  |
| SRPK         | single   | #N/A     | -   | dense    | #N/A   |
| GalNAc-T1    | single   | #N/A     | -   | #N/A     | #N/A   |
| Khc-73       | multiple | #N/A     | -   | #N/A     | #N/A   |
| mir-278      | single   | single   | no  | #N/A     | #N/A   |
| fus          | multiple | multiple | no  | dense    | single |
| CG8207       | multiple | multiple | no  | dense    | #N/A   |
| Vha14        | multiple | multiple | no  | dense    | #N/A   |
| CG30080      | #N/A     | single   | -   | single   | #N/A   |
| CG42662      | #N/A     | single   | -   | single   | #N/A   |
| CG30089      | multiple | dense    | yes | dense    | #N/A   |
| Zasp52       | multiple | dense    | yes | multiple | single |
| CG30321      | single   | multiple | yes | #N/A     | #N/A   |
| CG33465      | single   | multiple | yes | #N/A     | #N/A   |
| Poxn         | single   | single   | no  | #N/A     | #N/A   |
| CG8249       | single   | #N/A     | -   | single   | #N/A   |
| CG30085      | single   | #N/A     | -   | #N/A     | #N/A   |
| sli          | multiple | multiple | yes | dense    | dense  |
| CG33463      | single   | multiple | yes | #N/A     | dense  |
| bdg          | #N/A     | multiple | -   | single   | #N/A   |
| lap2         | #N/A     | single   | -   | single   | #N/A   |
| CG8297       | #N/A     | single   | -   | #N/A     | #N/A   |
| Strn-Mlck    | dense    | #N/A     | -   | #N/A     | #N/A   |
| Dg           | dense    | dense    | no  | dense    | #N/A   |
| mRpl34       | dense    | dense    | no  | #N/A     | #N/A   |
| CG8414       | dense    | dense    | yes | dense    | #N/A   |
| Rho1         | multiple | dense    | yes | dense    | #N/A   |
| Ric          | multiple | dense    | yes | dense    | #N/A   |
| CG10731      | #N/A     | single   | -   | dense    | #N/A   |
| Ext2         | #N/A     | single   | -   | dense    | #N/A   |
| CG10734      | single   | single   | yes | #N/A     | dense  |
| Lis-1        | #N/A     | single   | -   | #N/A     | #N/A   |
| CG8441       | #N/A     | single   | -   | #N/A     | #N/A   |
| CG8443       | #N/A     | single   | -   | #N/A     | #N/A   |
| shark        | #N/A     | single   | -   | #N/A     | #N/A   |
| mrj          | multiple | single   | yes | multiple | dense  |
| tRNA:CR30237 | single   | single   | no  | #N/A     | #N/A   |
| tRNA:CR30238 | single   | #N/A     | -   | #N/A     | #N/A   |
| tRNA:CR30239 | single   | #N/A     | -   | #N/A     | #N/A   |
| tRNA:CR30240 | single   | #N/A     | -   | #N/A     | #N/A   |
| CG7798       | single   | #N/A     | -   | #N/A     | dense  |
| CG15706      | single   | #N/A     | -   | #N/A     | dense  |
| Sema-2a      | multiple | multiple | yes | multiple | #N/A   |
| Cdk4         | multiple | single   | yes | multiple | dense  |
| RpLP2        | multiple | #N/A     | -   | #N/A     | dense  |
| CG8311       | multiple | #N/A     | -   | #N/A     | dense  |
| CG8306       | single   | single   | no  | single   | dense  |

|                |          |          |     |          |        |
|----------------|----------|----------|-----|----------|--------|
| CG8303         | single   | single   | no  | single   | #N/A   |
| Alk            | single   | single   | no  | #N/A     | dense  |
| gprs           | single   | single   | no  | #N/A     | dense  |
| CG30463        | single   | multiple | yes | multiple | #N/A   |
| Sfp53D         | single   | #N/A     | -   | #N/A     | #N/A   |
| CG15617        | single   | #N/A     | -   | #N/A     | #N/A   |
| resilin        | single   | single   | no  | #N/A     | #N/A   |
| CG5522         | single   | single   | no  | #N/A     | #N/A   |
| CG5550         | #N/A     | multiple | -   | #N/A     | #N/A   |
| CG34459        | single   | single   | no  | #N/A     | dense  |
| CG34460        | single   | multiple | yes | #N/A     | dense  |
| mir-8S         | multiple | #N/A     | -   | #N/A     | #N/A   |
| mir-8          | single   | single   | no  | #N/A     | #N/A   |
| Ugt37c1        | #N/A     | single   | -   | single   | #N/A   |
| CG8910         | single   | #N/A     | -   | #N/A     | #N/A   |
| Cbp53E         | single   | #N/A     | -   | #N/A     | #N/A   |
| Ark            | #N/A     | single   | -   | multiple | #N/A   |
| RhoGEF2        | #N/A     | single   | -   | multiple | #N/A   |
| CG30460        | single   | #N/A     | -   | #N/A     | #N/A   |
| CG11395        | #N/A     | single   | -   | #N/A     | #N/A   |
| snoRNA:U3:54Aa | #N/A     | single   | -   | #N/A     | single |
| tRNA:CR30234   | #N/A     | single   | -   | #N/A     | #N/A   |
| tRNA:CR30235   | #N/A     | single   | -   | #N/A     | #N/A   |
| snoRNA:U3:54Ab | #N/A     | single   | -   | #N/A     | single |
| CG17287        | single   | #N/A     | -   | #N/A     | #N/A   |
| CG30458        | single   | #N/A     | -   | #N/A     | #N/A   |
| CG30457        | single   | #N/A     | -   | #N/A     | #N/A   |
| mbl            | multiple | multiple | no  | #N/A     | #N/A   |
| tRNA:CR30232   | #N/A     | single   | -   | #N/A     | #N/A   |
| tRNA:H:56E     | #N/A     | single   | -   | #N/A     | #N/A   |
| Sip1           | #N/A     | single   | -   | #N/A     | #N/A   |
| cnk            | single   | single   | no  | #N/A     | #N/A   |
| l(2)k01209     | single   | single   | no  | single   | #N/A   |
| CG4802         | #N/A     | single   | -   | #N/A     | #N/A   |
| Bap55          | #N/A     | single   | -   | #N/A     | #N/A   |
| Lhr            | #N/A     | single   | -   | #N/A     | #N/A   |
| EDTP           | single   | multiple | yes | #N/A     | dense  |
| CG18467        | single   | single   | no  | #N/A     | single |
| CG10764        | #N/A     | single   | -   | #N/A     | single |
| CG34192        | #N/A     | single   | -   | dense    | single |
| robl           | #N/A     | single   | -   | dense    | single |
| CG14478        | single   | multiple | yes | dense    | single |
| qkr54B         | dense    | multiple | yes | #N/A     | single |
| CG6520         | dense    | multiple | yes | dense    | single |
| veil           | dense    | multiple | yes | #N/A     | single |
| CG14479        | dense    | dense    | no  | dense    | #N/A   |
| CG18431        | dense    | dense    | yes | dense    | dense  |
| CG4844         | dense    | dense    | yes | dense    | dense  |
| CG34193        | multiple | #N/A     | -   | #N/A     | #N/A   |
| CG4847         | multiple | #N/A     | -   | #N/A     | #N/A   |
| CG4853         | multiple | #N/A     | -   | #N/A     | #N/A   |
| cyp33          | #N/A     | single   | -   | #N/A     | #N/A   |
| Rpl18A         | #N/A     | single   | -   | single   | #N/A   |

|                |          |          |     |          |        |
|----------------|----------|----------|-----|----------|--------|
| MESR4          | #N/A     | single   | -   | single   | #N/A   |
| CG14480        | #N/A     | single   | -   | #N/A     | #N/A   |
| ns2            | #N/A     | single   | -   | #N/A     | #N/A   |
| POSH           | #N/A     | single   | -   | #N/A     | #N/A   |
| CG30105        | single   | #N/A     | -   | #N/A     | #N/A   |
| lack           | single   | #N/A     | -   | #N/A     | #N/A   |
| CG11423        | single   | #N/A     | -   | #N/A     | #N/A   |
| CG10936        | single   | #N/A     | -   | single   | single |
| snoRNA:Or-aca4 | single   | #N/A     | -   | #N/A     | #N/A   |
| Sema-1b        | multiple | multiple | no  | multiple | #N/A   |
| CG4966         | multiple | multiple | no  | single   | #N/A   |
| CG42561        | single   | single   | no  | #N/A     | #N/A   |
| CG42562        | single   | single   | no  | #N/A     | #N/A   |
| swi2           | single   | #N/A     | -   | #N/A     | #N/A   |
| rdgBbeta       | single   | #N/A     | -   | single   | #N/A   |
| CG6424         | single   | multiple | yes | single   | single |
| CG5002         | single   | single   | yes | #N/A     | #N/A   |
| CG6385         | single   | multiple | yes | #N/A     | #N/A   |
| HLH54F         | #N/A     | single   | -   | single   | #N/A   |
| CG14488        | single   | #N/A     | -   | single   | #N/A   |
| CG18635        | single   | #N/A     | -   | single   | #N/A   |
| CG6362         | single   | #N/A     | -   | #N/A     | #N/A   |
| CG33981        | single   | #N/A     | -   | #N/A     | #N/A   |
| fab1           | single   | #N/A     | -   | #N/A     | #N/A   |
| grh            | #N/A     | multiple | -   | dense    | #N/A   |
| Mapmodulin     | #N/A     | multiple | -   | single   | #N/A   |
| elk            | #N/A     | single   | -   | #N/A     | #N/A   |
| CG5773         | single   | single   | no  | #N/A     | #N/A   |
| adp            | single   | single   | no  | #N/A     | #N/A   |
| lolal          | single   | single   | no  | #N/A     | #N/A   |
| CG10914        | single   | single   | no  | #N/A     | #N/A   |
| CR14499        | #N/A     | single   | -   | #N/A     | #N/A   |
| CG30114        | single   | dense    | yes | #N/A     | #N/A   |
| fj             | #N/A     | dense    | -   | #N/A     | #N/A   |
| sbb            | multiple | dense    | yes | dense    | dense  |
| CG14502        | #N/A     | multiple | -   | single   | #N/A   |
| CG18536        | #N/A     | multiple | -   | single   | #N/A   |
| CG18537        | #N/A     | single   | -   | #N/A     | #N/A   |
| CG18538        | single   | #N/A     | -   | #N/A     | #N/A   |
| CG18539        | single   | #N/A     | -   | #N/A     | #N/A   |
| CG18540        | single   | #N/A     | -   | #N/A     | #N/A   |
| CG14505        | multiple | #N/A     | -   | #N/A     | dense  |
| Tango8         | single   | #N/A     | -   | #N/A     | dense  |
| GstE9          | single   | single   | no  | #N/A     | #N/A   |
| imd            | single   | single   | no  | single   | #N/A   |
| Dp1            | single   | single   | no  | single   | #N/A   |
| CG10924        | multiple | single   | yes | #N/A     | #N/A   |
| Pepck          | single   | #N/A     | -   | #N/A     | #N/A   |
| Rgk2           | single   | #N/A     | -   | #N/A     | #N/A   |
| CG30115        | multiple | dense    | yes | dense    | single |
| CG30122        | single   | #N/A     | -   | #N/A     | #N/A   |
| tRNA:CR30227   | single   | #N/A     | -   | #N/A     | #N/A   |
| CG42306        | single   | #N/A     | -   | #N/A     | #N/A   |

|                  |          |          |     |          |        |
|------------------|----------|----------|-----|----------|--------|
| Gint3            | single   | #N/A     | -   | #N/A     | #N/A   |
| CG33136          | single   | dense    | yes | dense    | dense  |
| edl              | dense    | dense    | no  | dense    | dense  |
| CG15086          | dense    | dense    | no  | dense    | dense  |
| CG15072          | single   | single   | no  | dense    | #N/A   |
| l(2)08717        | single   | single   | no  | multiple | #N/A   |
| sano             | single   | single   | no  | single   | single |
| prod             | single   | #N/A     | -   | #N/A     | #N/A   |
| CG15107          | single   | #N/A     | -   | #N/A     | #N/A   |
| Topors           | single   | #N/A     | -   | #N/A     | #N/A   |
| CG15117          | single   | single   | no  | single   | #N/A   |
| botv             | single   | single   | no  | single   | #N/A   |
| CG15118          | multiple | multiple | no  | dense    | #N/A   |
| CG15111          | multiple | multiple | no  | dense    | #N/A   |
| ena              | single   | single   | no  | dense    | #N/A   |
| CG10737          | single   | single   | no  | #N/A     | #N/A   |
| hppy             | single   | single   | no  | #N/A     | #N/A   |
| wbl              | single   | #N/A     | -   | #N/A     | #N/A   |
| CG33454          | single   | #N/A     | -   | #N/A     | #N/A   |
| CG33453          | dense    | dense    | yes | #N/A     | #N/A   |
| CG7229           | dense    | dense    | yes | dense    | #N/A   |
| rib              | dense    | dense    | yes | dense    | #N/A   |
| FK506-bp2        | single   | single   | no  | #N/A     | #N/A   |
| mip40            | single   | single   | no  | #N/A     | #N/A   |
| Tab2             | single   | single   | no  | single   | #N/A   |
| CG11961          | single   | #N/A     | -   | #N/A     | #N/A   |
| CG10051          | single   | #N/A     | -   | #N/A     | #N/A   |
| CG9416           | #N/A     | single   | -   | single   | #N/A   |
| CG10062          | #N/A     | single   | -   | #N/A     | #N/A   |
| hts              | single   | #N/A     | -   | #N/A     | #N/A   |
| CalpA            | single   | #N/A     | -   | #N/A     | #N/A   |
| betaTub56D       | single   | multiple | yes | single   | #N/A   |
| CG7744           | single   | multiple | yes | #N/A     | #N/A   |
| par-1            | multiple | single   | yes | #N/A     | #N/A   |
| sm               | multiple | single   | yes | dense    | #N/A   |
| CG15125          | dense    | #N/A     | -   | #N/A     | #N/A   |
| mir-6-3          | dense    | #N/A     | -   | #N/A     | #N/A   |
| mir-6-2          | dense    | #N/A     | -   | #N/A     | #N/A   |
| mir-6-1          | dense    | #N/A     | -   | #N/A     | #N/A   |
| mir-5            | dense    | #N/A     | -   | #N/A     | #N/A   |
| mir-4            | dense    | #N/A     | -   | #N/A     | #N/A   |
| mir-4S           | dense    | #N/A     | -   | #N/A     | #N/A   |
| mir-286          | dense    | #N/A     | -   | #N/A     | #N/A   |
| mir-3            | dense    | #N/A     | -   | #N/A     | #N/A   |
| mir-309          | dense    | #N/A     | -   | #N/A     | #N/A   |
| CG11018          | dense    | #N/A     | -   | #N/A     | #N/A   |
| hrg              | dense    | #N/A     | -   | single   | #N/A   |
| isopeptidase-T-3 | single   | #N/A     | -   | #N/A     | #N/A   |
| CG8517           | multiple | #N/A     | -   | #N/A     | #N/A   |
| tRNA:CR30452     | multiple | #N/A     | -   | #N/A     | #N/A   |
| tRNA:CR30218     | multiple | #N/A     | -   | #N/A     | #N/A   |
| tRNA:E4:56Fc     | multiple | #N/A     | -   | #N/A     | #N/A   |
| snoRNA:185       | multiple | #N/A     | -   | #N/A     | #N/A   |

|                |          |          |     |          |          |
|----------------|----------|----------|-----|----------|----------|
| tRNA:E4:56Fb   | multiple | #N/A     | -   | #N/A     | #N/A     |
| tRNA:E4:56Fa   | multiple | #N/A     | -   | #N/A     | #N/A     |
| tRNA:CR30454   | multiple | #N/A     | -   | #N/A     | #N/A     |
| tRNA:CR30220   | multiple | #N/A     | -   | #N/A     | #N/A     |
| tRNA:CR30449   | multiple | #N/A     | -   | #N/A     | #N/A     |
| 5SrRNA:CR33452 | multiple | #N/A     | -   | #N/A     | #N/A     |
| 5SrRNA:CR33451 | multiple | #N/A     | -   | #N/A     | #N/A     |
| 5SrRNA:CR33450 | multiple | #N/A     | -   | #N/A     | #N/A     |
| Obp56g         | #N/A     | multiple | -   | #N/A     | #N/A     |
| tRNA:K2:56EF   | #N/A     | multiple | -   | #N/A     | #N/A     |
| Obp56h         | #N/A     | dense    | -   | #N/A     | #N/A     |
| Toll-7         | multiple | dense    | yes | multiple | #N/A     |
| Obp56i         | single   | multiple | yes | #N/A     | #N/A     |
| CG30447        | #N/A     | multiple | -   | #N/A     | #N/A     |
| 18w            | dense    | dense    | no  | dense    | #N/A     |
| CG11200        | #N/A     | single   | -   | #N/A     | #N/A     |
| CG8920         | #N/A     | single   | -   | #N/A     | dense    |
| CG13868        | #N/A     | single   | -   | #N/A     | #N/A     |
| CG12484        | #N/A     | single   | -   | #N/A     | #N/A     |
| CG13423        | single   | #N/A     | -   | #N/A     | #N/A     |
| CG13427        | single   | #N/A     | -   | #N/A     | #N/A     |
| CG13428        | single   | #N/A     | -   | #N/A     | #N/A     |
| l(2)05510      | #N/A     | multiple | -   | multiple | #N/A     |
| mir-310        | #N/A     | single   | -   | #N/A     | #N/A     |
| mir-311        | #N/A     | single   | -   | #N/A     | #N/A     |
| mir-312        | #N/A     | single   | -   | #N/A     | #N/A     |
| mir-313        | #N/A     | single   | -   | #N/A     | #N/A     |
| Nnf1a          | #N/A     | single   | -   | #N/A     | #N/A     |
| bl             | multiple | dense    | yes | dense    | dense    |
| mir-7          | single   | dense    | yes | #N/A     | #N/A     |
| Hil            | single   | dense    | yes | dense    | dense    |
| CG33785        | multiple | multiple | no  | #N/A     | dense    |
| CG33786        | multiple | multiple | no  | #N/A     | dense    |
| DMAP1          | multiple | multiple | no  | dense    | dense    |
| Lrt            | multiple | multiple | no  | dense    | dense    |
| dpr            | single   | #N/A     | -   | #N/A     | #N/A     |
| CG34201        | single   | #N/A     | -   | #N/A     | #N/A     |
| CG34202        | single   | #N/A     | -   | #N/A     | #N/A     |
| CG15225        | single   | #N/A     | -   | #N/A     | #N/A     |
| insc           | multiple | dense    | yes | dense    | dense    |
| sktl           | single   | single   | no  | dense    | single   |
| CG15227        | single   | #N/A     | -   | #N/A     | #N/A     |
| otp            | single   | multiple | yes | multiple | multiple |
| CG9235         | single   | single   | no  | #N/A     | #N/A     |
| Rx             | #N/A     | dense    | -   | #N/A     | #N/A     |
| CG33704        | single   | single   | no  | #N/A     | #N/A     |
| hbn            | dense    | multiple | yes | dense    | #N/A     |
| dgt3           | single   | multiple | yes | #N/A     | #N/A     |
| Pros29         | single   | multiple | yes | #N/A     | #N/A     |
| CG10543        | multiple | multiple | no  | #N/A     | #N/A     |
| CG30291        | single   | #N/A     | -   | #N/A     | #N/A     |
| shg            | multiple | dense    | yes | dense    | #N/A     |
| cpa            | single   | single   | no  | dense    | #N/A     |

|               |          |          |     |          |          |
|---------------|----------|----------|-----|----------|----------|
| CG15653       | single   | single   | no  | #N/A     | #N/A     |
| CG4030        | single   | #N/A     | -   | #N/A     | #N/A     |
| CG34396       | multiple | single   | yes | single   | #N/A     |
| king-tubby    | single   | single   | no  | single   | #N/A     |
| Magi          | #N/A     | single   | -   | single   | dense    |
| CG9406        | #N/A     | single   | -   | single   | dense    |
| Xbp1          | #N/A     | single   | -   | #N/A     | dense    |
| CG30389       | single   | dense    | yes | single   | single   |
| tRNA:CR30206  | single   | dense    | yes | #N/A     | #N/A     |
| tRNA:G3:57BCa | single   | dense    | yes | #N/A     | #N/A     |
| tRNA:CR30208  | single   | dense    | yes | #N/A     | #N/A     |
| CG4266        | single   | dense    | yes | #N/A     | single   |
| CG10505       | #N/A     | single   | -   | #N/A     | #N/A     |
| CG30392       | single   | single   | yes | #N/A     | #N/A     |
| CG30390       | single   | single   | yes | #N/A     | #N/A     |
| RpL29         | single   | #N/A     | -   | multiple | #N/A     |
| CG9752        | single   | #N/A     | -   | multiple | #N/A     |
| CG42672       | single   | #N/A     | -   | multiple | #N/A     |
| CG9754        | single   | #N/A     | -   | #N/A     | #N/A     |
| CG9485        | single   | #N/A     | -   | #N/A     | #N/A     |
| cv-2          | multiple | dense    | yes | multiple | single   |
| Sdc           | multiple | dense    | yes | multiple | multiple |
| Sara          | single   | #N/A     | -   | #N/A     | single   |
| Fkbp13        | single   | #N/A     | -   | dense    | #N/A     |
| CG10496       | multiple | #N/A     | -   | dense    | #N/A     |
| MESK2         | single   | #N/A     | -   | #N/A     | #N/A     |
| CG30288       | #N/A     | dense    | -   | #N/A     | #N/A     |
| CG30289       | dense    | dense    | no  | dense    | #N/A     |
| Egfr          | dense    | dense    | no  | dense    | single   |
| CG10440       | single   | single   | no  | single   | dense    |
| CG10082       | single   | single   | no  | multiple | #N/A     |
| HmgZ          | multiple | dense    | yes | dense    | #N/A     |
| CG30403       | #N/A     | single   | -   | #N/A     | #N/A     |
| HmgD          | #N/A     | single   | -   | #N/A     | #N/A     |
| Tango11       | #N/A     | single   | -   | #N/A     | #N/A     |
| LBR           | single   | #N/A     | -   | #N/A     | #N/A     |
| tRNA:CR30406  | #N/A     | multiple | -   | #N/A     | #N/A     |
| comr          | #N/A     | single   | -   | single   | #N/A     |
| Fili          | single   | dense    | yes | dense    | dense    |
| PpN58A        | single   | multiple | yes | #N/A     | #N/A     |
| CG30401       | single   | #N/A     | -   | #N/A     | #N/A     |
| CG34370       | single   | #N/A     | -   | #N/A     | #N/A     |
| Vrp1          | single   | #N/A     | -   | #N/A     | #N/A     |
| mei-5332      | single   | #N/A     | -   | #N/A     | #N/A     |
| GM130         | single   | #N/A     | -   | #N/A     | #N/A     |
| a             | single   | #N/A     | -   | single   | #N/A     |
| CG3074        | single   | #N/A     | -   | #N/A     | dense    |
| snoRNA:Or-CD1 | single   | #N/A     | -   | #N/A     | dense    |
| CG3264        | #N/A     | single   | -   | #N/A     | #N/A     |
| CG11291       | #N/A     | single   | -   | single   | #N/A     |
| ari-2         | #N/A     | single   | -   | single   | #N/A     |
| CG30278       | #N/A     | single   | -   | #N/A     | #N/A     |
| Oatp58Dc      | single   | #N/A     | -   | #N/A     | #N/A     |

|                               |          |          |     |        |          |
|-------------------------------|----------|----------|-----|--------|----------|
| dve                           | multiple | dense    | yes | dense  | single   |
| Gp150                         | multiple | multiple | no  | dense  | multiple |
| CG34208                       | single   | #N/A     | -   | #N/A   | #N/A     |
| CG11206                       | single   | #N/A     | -   | #N/A   | single   |
| CG3624                        | single   | multiple | yes | dense  | #N/A     |
| CG6044                        | single   | multiple | yes | dense  | #N/A     |
| ventrally-expressed-protein-D | #N/A     | single   | -   | single | #N/A     |
| qkr58E-3                      | #N/A     | single   | -   | single | #N/A     |
| Mes4                          | #N/A     | single   | -   | #N/A   | #N/A     |
| CG4610                        | dense    | dense    | no  | #N/A   | #N/A     |
| px                            | dense    | dense    | no  | dense  | #N/A     |
| CG11362                       | single   | #N/A     | -   | #N/A   | #N/A     |
| dnr1                          | single   | single   | yes | #N/A   | single   |
| CG3927                        | #N/A     | single   | -   | #N/A   | #N/A     |
| CG4294                        | single   | #N/A     | -   | single | #N/A     |
| RpS16                         | single   | #N/A     | -   | single | #N/A     |
| snoRNA:Me28S-G2173            | single   | #N/A     | -   | #N/A   | #N/A     |
| snoRNA:Psi28S-1175a           | single   | #N/A     | -   | #N/A   | #N/A     |
| snoRNA:Psi28S-1175b           | single   | #N/A     | -   | #N/A   | #N/A     |
| snoRNA:Psi28S-1175c           | single   | #N/A     | -   | #N/A   | #N/A     |
| snoRNA:Or-aca1                | single   | #N/A     | -   | #N/A   | #N/A     |
| Vps20                         | single   | #N/A     | -   | #N/A   | #N/A     |
| CG4329                        | single   | #N/A     | -   | #N/A   | #N/A     |
| RpS24                         | #N/A     | dense    | -   | #N/A   | #N/A     |
| Ugt58Fa                       | #N/A     | dense    | -   | #N/A   | dense    |
| CG2852                        | #N/A     | dense    | -   | #N/A   | dense    |
| CG30195                       | #N/A     | dense    | -   | #N/A   | dense    |
| CG34446                       | #N/A     | dense    | -   | #N/A   | dense    |
| CG34445                       | #N/A     | dense    | -   | #N/A   | dense    |
| CG3746                        | #N/A     | dense    | -   | #N/A   | dense    |
| ppa                           | dense    | dense    | no  | dense  | multiple |
| robo                          | dense    | dense    | no  | single | single   |
| CG30259                       | single   | single   | no  | single | #N/A     |
| Obp59a                        | single   | single   | no  | #N/A   | #N/A     |
| jbug                          | single   | #N/A     | -   | #N/A   | #N/A     |
| CG42260                       | single   | #N/A     | -   | #N/A   | dense    |
| blw                           | multiple | dense    | yes | dense  | dense    |
| CycB                          | single   | dense    | yes | dense  | dense    |
| stl                           | #N/A     | dense    | -   | #N/A   | #N/A     |
| CG30271                       | multiple | #N/A     | -   | #N/A   | #N/A     |
| CG42284                       | multiple | #N/A     | -   | #N/A   | #N/A     |
| CG30274                       | single   | #N/A     | -   | #N/A   | #N/A     |
| fd59A                         | #N/A     | single   | -   | #N/A   | #N/A     |
| CG13532                       | single   | multiple | yes | #N/A   | #N/A     |
| PIP5K59B                      | single   | single   | no  | #N/A   | #N/A     |
| CG3499                        | multiple | #N/A     | -   | #N/A   | #N/A     |
| asrij                         | multiple | #N/A     | -   | #N/A   | #N/A     |
| Gmer                          | multiple | #N/A     | -   | single | #N/A     |
| CG3700                        | multiple | #N/A     | -   | single | #N/A     |
| MED23                         | multiple | #N/A     | -   | single | #N/A     |
| nahoda                        | single   | single   | no  | #N/A   | #N/A     |
| Nup214                        | #N/A     | single   | -   | single | #N/A     |
| CG42678                       | #N/A     | single   | -   | #N/A   | #N/A     |

|                   |          |          |     |          |          |
|-------------------|----------|----------|-----|----------|----------|
| CG3788            | #N/A     | single   | -   | #N/A     | #N/A     |
| CG3800            | #N/A     | single   | -   | single   | #N/A     |
| CG9849            | #N/A     | single   | -   | single   | #N/A     |
| CG3831            | #N/A     | single   | -   | #N/A     | #N/A     |
| CG34209           | dense    | #N/A     | -   | #N/A     | #N/A     |
| twi               | dense    | dense    | yes | #N/A     | #N/A     |
| CG3085            | single   | #N/A     | -   | #N/A     | #N/A     |
| Art7              | single   | #N/A     | -   | #N/A     | #N/A     |
| Gr59a             | single   | #N/A     | -   | #N/A     | #N/A     |
| Gr59b             | single   | #N/A     | -   | #N/A     | #N/A     |
| CG9876            | #N/A     | single   | -   | single   | #N/A     |
| Klp59C            | #N/A     | single   | -   | #N/A     | #N/A     |
| CG34371           | multiple | dense    | yes | dense    | multiple |
| CG13539           | #N/A     | single   | -   | #N/A     | single   |
| CG3162            | single   | dense    | yes | #N/A     | #N/A     |
| CG3092            | single   | multiple | yes | #N/A     | #N/A     |
| CG30412           | single   | single   | no  | #N/A     | #N/A     |
| CG30416           | single   | single   | no  | #N/A     | #N/A     |
| CG9861            | single   | single   | no  | #N/A     | #N/A     |
| CG3500            | single   | #N/A     | -   | #N/A     | #N/A     |
| CG9875            | single   | #N/A     | -   | #N/A     | #N/A     |
| CG34423           | single   | #N/A     | -   | #N/A     | #N/A     |
| CG34424           | single   | #N/A     | -   | #N/A     | #N/A     |
| vir               | multiple | single   | yes | #N/A     | #N/A     |
| CG13550           | single   | single   | no  | #N/A     | #N/A     |
| Or59a             | single   | single   | no  | #N/A     | #N/A     |
| chrw              | single   | #N/A     | -   | #N/A     | #N/A     |
| CG5360            | single   | #N/A     | -   | #N/A     | #N/A     |
| levy              | single   | single   | no  | #N/A     | #N/A     |
| pita              | multiple | single   | yes | #N/A     | #N/A     |
| Dcp-1             | multiple | single   | yes | #N/A     | #N/A     |
| Rrp4              | single   | #N/A     | -   | #N/A     | #N/A     |
| alphaPS5          | single   | #N/A     | -   | #N/A     | #N/A     |
| CG30184           | multiple | dense    | yes | #N/A     | #N/A     |
| apt               | multiple | dense    | yes | dense    | single   |
| CG5398            | single   | #N/A     | -   | #N/A     | #N/A     |
| CG17664           | single   | #N/A     | -   | #N/A     | #N/A     |
| CG17662           | single   | #N/A     | -   | #N/A     | #N/A     |
| CG4019            | single   | #N/A     | -   | #N/A     | #N/A     |
| retn              | dense    | dense    | no  | dense    | #N/A     |
| Pde8              | single   | #N/A     | -   | #N/A     | #N/A     |
| CG5428            | single   | #N/A     | -   | #N/A     | #N/A     |
| l(2)not           | single   | single   | no  | single   | #N/A     |
| l(2)tid           | single   | single   | no  | single   | #N/A     |
| egl               | dense    | dense    | no  | multiple | single   |
| CG13560           | dense    | dense    | no  | #N/A     | single   |
| CG34105           | dense    | dense    | no  | #N/A     | single   |
| CG12491           | dense    | dense    | no  | #N/A     | single   |
| CG11300           | single   | #N/A     | -   | #N/A     | #N/A     |
| CG5532            | single   | #N/A     | -   | #N/A     | #N/A     |
| CG9850            | single   | #N/A     | -   | #N/A     | #N/A     |
| CG5549            | #N/A     | single   | -   | #N/A     | #N/A     |
| snoRNA:Psi18S-176 | #N/A     | single   | -   | #N/A     | #N/A     |



|                       |          |        |     |          |        |
|-----------------------|----------|--------|-----|----------|--------|
| shu                   | #N/A     | single | -   | #N/A     | #N/A   |
| ken                   | single   | single | no  | single   | single |
| CG4882                | #N/A     | single | -   | #N/A     | #N/A   |
| PHDP                  | #N/A     | single | -   | #N/A     | #N/A   |
| CG5597                | #N/A     | single | -   | #N/A     | #N/A   |
| CG3803                | #N/A     | single | -   | #N/A     | #N/A   |
| thoc5                 | single   | single | no  | single   | #N/A   |
| CG16787               | single   | single | no  | single   | #N/A   |
| alpha-catenin-related | single   | single | no  | single   | #N/A   |
| mr                    | single   | single | no  | #N/A     | #N/A   |
| CG3825                | single   | single | no  | #N/A     | #N/A   |
| Sox14                 | single   | single | no  | single   | #N/A   |
| Adk2                  | #N/A     | single | -   | #N/A     | #N/A   |
| PebIII                | #N/A     | single | -   | #N/A     | #N/A   |
| HSPC300               | #N/A     | single | -   | #N/A     | #N/A   |
| CG3163                | #N/A     | single | -   | #N/A     | #N/A   |
| CG30172               | single   | single | yes | #N/A     | #N/A   |
| Chi                   | single   | single | yes | #N/A     | #N/A   |
| MAN1                  | single   | #N/A   | -   | #N/A     | #N/A   |
| CG13567               | single   | #N/A   | -   | #N/A     | #N/A   |
| CG13568               | single   | single | no  | single   | #N/A   |
| CG13563               | single   | single | no  | single   | #N/A   |
| eIF-5A                | single   | single | no  | single   | #N/A   |
| RpL12                 | single   | single | no  | single   | #N/A   |
| yki                   | single   | single | no  | single   | #N/A   |
| CG3209                | single   | single | no  | single   | #N/A   |
| Mlp60A                | single   | #N/A   | -   | #N/A     | #N/A   |
| CG10339               | single   | #N/A   | -   | #N/A     | #N/A   |
| CG13564               | single   | #N/A   | -   | #N/A     | #N/A   |
| CG16786               | single   | #N/A   | -   | multiple | #N/A   |
| nvx                   | multiple | single | yes | #N/A     | #N/A   |
| betaTub60D            | single   | dense  | yes | #N/A     | #N/A   |
| CG13578               | #N/A     | single | -   | #N/A     | #N/A   |
| mAcR-60C              | #N/A     | single | -   | #N/A     | #N/A   |
| slik                  | single   | single | no  | single   | #N/A   |
| Mov34                 | single   | single | no  | single   | #N/A   |
| SerT                  | single   | single | no  | #N/A     | #N/A   |
| CG4622                | single   | #N/A   | -   | multiple | dense  |
| CG11413               | single   | #N/A   | -   | #N/A     | #N/A   |
| itp                   | single   | #N/A   | -   | multiple | dense  |
| CG4681                | #N/A     | single | -   | #N/A     | #N/A   |
| pio                   | single   | single | yes | dense    | #N/A   |
| CG13587               | single   | #N/A   | -   | #N/A     | #N/A   |
| CG4692                | single   | #N/A   | -   | #N/A     | #N/A   |
| CG3548                | single   | #N/A   | -   | #N/A     | #N/A   |
| CG3565                | single   | #N/A   | -   | #N/A     | #N/A   |
| Cpr60D                | single   | #N/A   | -   | #N/A     | #N/A   |
| CG30161               | single   | #N/A   | -   | #N/A     | #N/A   |
| CG3683                | single   | #N/A   | -   | #N/A     | #N/A   |
| CG34214               | single   | #N/A   | -   | #N/A     | #N/A   |
| CG4806                | multiple | #N/A   | -   | #N/A     | #N/A   |
| CG33228               | multiple | #N/A   | -   | #N/A     | #N/A   |
| Pof                   | single   | #N/A   | -   | #N/A     | #N/A   |

|              |          |          |     |          |        |
|--------------|----------|----------|-----|----------|--------|
| Mmp1         | single   | #N/A     | -   | #N/A     | single |
| CG33988      | single   | single   | no  | #N/A     | #N/A   |
| CG30421      | single   | #N/A     | -   | single   | #N/A   |
| spz6         | single   | #N/A     | -   | #N/A     | #N/A   |
| CG3611       | #N/A     | multiple | -   | #N/A     | #N/A   |
| Dll          | multiple | dense    | yes | #N/A     | #N/A   |
| CG3650       | #N/A     | multiple | -   | #N/A     | #N/A   |
| Atf-2        | single   | single   | yes | multiple | #N/A   |
| NKAIN        | single   | single   | no  | single   | #N/A   |
| Ance-5       | #N/A     | single   | -   | #N/A     | #N/A   |
| NaCP60E      | multiple | multiple | no  | single   | dense  |
| RpL41        | single   | single   | no  | single   | dense  |
| pain         | single   | #N/A     | -   | #N/A     | #N/A   |
| CG30427      | #N/A     | single   | -   | #N/A     | #N/A   |
| CG3760       | #N/A     | single   | -   | #N/A     | #N/A   |
| CG2811       | #N/A     | single   | -   | #N/A     | #N/A   |
| Tina-1       | #N/A     | single   | -   | #N/A     | #N/A   |
| CG30424      | single   | single   | no  | #N/A     | dense  |
| RpL19        | single   | single   | no  | dense    | dense  |
| CG3776       | single   | single   | no  | dense    | dense  |
| Phk-3        | single   | single   | no  | dense    | dense  |
| emp          | single   | single   | no  | #N/A     | single |
| CG3829       | single   | single   | no  | dense    | single |
| zip          | dense    | dense    | no  | dense    | single |
| uzip         | dense    | dense    | no  | dense    | single |
| Nplp1        | #N/A     | multiple | -   | #N/A     | #N/A   |
| gsb-n        | single   | multiple | -   | dense    | #N/A   |
| gsb          | single   | dense    | yes | dense    | #N/A   |
| gol          | single   | multiple | yes | single   | #N/A   |
| tRNA:CR30198 | #N/A     | single   | -   | #N/A     | #N/A   |
| tRNA:CR30199 | #N/A     | single   | -   | #N/A     | #N/A   |
| tRNA:CR30200 | #N/A     | single   | -   | #N/A     | #N/A   |
| CG16778      | multiple | multiple | yes | multiple | #N/A   |
| CG34038      | #N/A     | single   | -   | #N/A     | single |
| Sfp60F       | #N/A     | single   | -   | #N/A     | single |
| PebII        | #N/A     | single   | -   | #N/A     | single |
| CG9380       | single   | multiple | yes | #N/A     | #N/A   |
| Kr           | dense    | dense    | yes | multiple | dense  |
| CG30429      | #N/A     | single   | -   | #N/A     | #N/A   |
| mthl8        | single   | #N/A     | -   | #N/A     | #N/A   |
| Pk61C        | dense    | dense    | no  | single   | #N/A   |
| CG6845       | #N/A     | single   | -   | #N/A     | #N/A   |
| CG7051       | #N/A     | multiple | -   | #N/A     | #N/A   |
| p130CAS      | #N/A     | multiple | -   | #N/A     | #N/A   |
| pyx          | #N/A     | single   | -   | #N/A     | #N/A   |
| CG16971      | #N/A     | single   | -   | #N/A     | #N/A   |
| CG33229      | #N/A     | single   | -   | #N/A     | #N/A   |
| CR32477      | #N/A     | single   | -   | single   | #N/A   |
| miple        | #N/A     | single   | -   | #N/A     | #N/A   |
| miple2       | #N/A     | single   | -   | single   | #N/A   |
| CG32845      | #N/A     | single   | -   | single   | #N/A   |
| CG42377      | single   | dense    | yes | #N/A     | #N/A   |
| RhoGEF3      | single   | dense    | yes | single   | #N/A   |

|                    |          |          |     |          |          |
|--------------------|----------|----------|-----|----------|----------|
| fwd                | single   | dense    | yes | dense    | single   |
| CG34264            | single   | dense    | yes | dense    | single   |
| CG32344            | single   | dense    | yes | dense    | multiple |
| CG32343            | #N/A     | dense    | -   | #N/A     | single   |
| Ptpmeg             | single   | single   | no  | single   | single   |
| mth                | single   | single   | no  | single   | #N/A     |
| trh                | multiple | multiple | no  | #N/A     | #N/A     |
| klar               | dense    | dense    | no  | multiple | single   |
| CG34269            | single   | #N/A     | -   | #N/A     | #N/A     |
| CG17180            | dense    | dense    | no  | #N/A     | #N/A     |
| Cypl               | dense    | dense    | no  | #N/A     | #N/A     |
| hipk               | dense    | dense    | no  | single   | #N/A     |
| CG17181            | #N/A     | multiple | -   | single   | dense    |
| MED14              | #N/A     | single   | -   | #N/A     | dense    |
| Reg-2              | multiple | multiple | yes | dense    | #N/A     |
| ban                | dense    | dense    | yes | #N/A     | #N/A     |
| CG12030            | dense    | dense    | yes | dense    | #N/A     |
| CG17129            | #N/A     | single   | -   | #N/A     | single   |
| CG3386             | #N/A     | single   | -   | dense    | single   |
| CG3371             | single   | multiple | yes | dense    | single   |
| CG3344             | single   | single   | no  | dense    | #N/A     |
| CG32483            | single   | single   | no  | #N/A     | #N/A     |
| CG13894            | #N/A     | multiple | -   | dense    | #N/A     |
| CG13895            | single   | #N/A     | -   | dense    | dense    |
| tRNA:M-i:61D       | multiple | #N/A     | -   | #N/A     | #N/A     |
| emc                | multiple | multiple | yes | multiple | #N/A     |
| tRNA:CR32480       | single   | single   | yes | #N/A     | #N/A     |
| CG13898            | single   | #N/A     | -   | #N/A     | #N/A     |
| CG13900            | multiple | multiple | no  | #N/A     | #N/A     |
| snoRNA:Me28S-C788b | multiple | multiple | no  | #N/A     | #N/A     |
| CG34056            | #N/A     | single   | -   | #N/A     | #N/A     |
| CG34057            | #N/A     | single   | -   | #N/A     | #N/A     |
| CG13905            | #N/A     | single   | -   | #N/A     | #N/A     |
| Glut1              | #N/A     | single   | -   | #N/A     | #N/A     |
| bab1               | single   | multiple | yes | dense    | dense    |
| bab2               | single   | multiple | yes | multiple | dense    |
| Klp61F             | single   | single   | no  | #N/A     | #N/A     |
| CG32318            | single   | single   | no  | #N/A     | #N/A     |
| Psf1               | single   | single   | no  | single   | #N/A     |
| Sac1               | single   | single   | no  | single   | #N/A     |
| CG9129             | single   | single   | no  | #N/A     | #N/A     |
| Ptp61F             | dense    | dense    | yes | dense    | dense    |
| 312                | single   | dense    | yes | #N/A     | #N/A     |
| ru                 | #N/A     | dense    | -   | #N/A     | #N/A     |
| tRNA:E4:62Aa       | single   | single   | yes | #N/A     | #N/A     |
| tRNA:E4:62Ab       | single   | single   | yes | #N/A     | #N/A     |
| tRNA:E4:62Ac       | single   | single   | yes | #N/A     | #N/A     |
| tRNA:CR32324       | single   | dense    | yes | #N/A     | #N/A     |
| CG32320            | dense    | dense    | yes | single   | single   |
| tRNA:E4:62Ad       | dense    | dense    | yes | #N/A     | #N/A     |
| tRNA:E4:62Ae       | dense    | dense    | yes | #N/A     | #N/A     |
| CG9168             | #N/A     | multiple | -   | single   | #N/A     |
| FucTD              | #N/A     | multiple | -   | #N/A     | #N/A     |

|                     |          |          |     |          |        |
|---------------------|----------|----------|-----|----------|--------|
| SA-2                | multiple | dense    | yes | dense    | #N/A   |
| rho                 | dense    | dense    | no  | single   | #N/A   |
| stet                | single   | single   | no  | #N/A     | #N/A   |
| robl62A             | single   | single   | no  | #N/A     | #N/A   |
| pUf68               | single   | #N/A     | -   | #N/A     | dense  |
| Psa                 | multiple | multiple | no  | single   | #N/A   |
| cue                 | multiple | multiple | no  | single   | #N/A   |
| CG12091             | #N/A     | single   | -   | #N/A     | #N/A   |
| CG7852              | #N/A     | single   | -   | #N/A     | #N/A   |
| CG7879              | single   | #N/A     | -   | #N/A     | #N/A   |
| CG12003             | single   | #N/A     | -   | #N/A     | #N/A   |
| CG12004             | single   | #N/A     | -   | #N/A     | #N/A   |
| CG13917             | #N/A     | single   | -   | #N/A     | #N/A   |
| n-syb               | single   | #N/A     | -   | #N/A     | #N/A   |
| CG7974              | #N/A     | single   | -   | #N/A     | #N/A   |
| Uhg7                | #N/A     | multiple | -   | #N/A     | #N/A   |
| snoRNA:Me28S-A2634c | #N/A     | single   | -   | #N/A     | #N/A   |
| snoRNA:Me28S-A2634b | #N/A     | single   | -   | #N/A     | #N/A   |
| snoRNA:Me28S-A2634a | #N/A     | multiple | -   | #N/A     | #N/A   |
| Rpl23A              | #N/A     | single   | -   | #N/A     | #N/A   |
| RabX5               | #N/A     | single   | -   | #N/A     | #N/A   |
| CG13930             | #N/A     | multiple | -   | #N/A     | #N/A   |
| drpr                | #N/A     | single   | -   | #N/A     | #N/A   |
| CG18171             | #N/A     | single   | -   | #N/A     | #N/A   |
| CG12035             | #N/A     | single   | -   | #N/A     | #N/A   |
| CG7995              | single   | single   | no  | #N/A     | #N/A   |
| CG13921             | single   | single   | no  | single   | #N/A   |
| alpha-Spec          | #N/A     | single   | -   | #N/A     | #N/A   |
| dlt                 | #N/A     | single   | -   | #N/A     | #N/A   |
| Cdc37               | #N/A     | single   | -   | #N/A     | #N/A   |
| CG12020             | #N/A     | single   | -   | #N/A     | #N/A   |
| CG12024             | multiple | single   | yes | #N/A     | #N/A   |
| R                   | multiple | single   | yes | single   | #N/A   |
| HBS1                | multiple | single   | yes | #N/A     | #N/A   |
| CG12025             | multiple | #N/A     | -   | #N/A     | #N/A   |
| CG13937             | #N/A     | single   | -   | #N/A     | #N/A   |
| Aprt                | #N/A     | single   | -   | single   | #N/A   |
| CG12026             | #N/A     | single   | -   | multiple | #N/A   |
| CG42234             | single   | multiple | yes | #N/A     | #N/A   |
| tRNA:CR32312        | single   | multiple | yes | #N/A     | #N/A   |
| CG42357             | single   | #N/A     | -   | #N/A     | #N/A   |
| sls                 | single   | #N/A     | -   | single   | #N/A   |
| CG8960              | single   | #N/A     | -   | #N/A     | #N/A   |
| CG13800             | multiple | multiple | no  | #N/A     | dense  |
| CG32298             | multiple | single   | yes | #N/A     | dense  |
| CG32299             | multiple | single   | yes | #N/A     | dense  |
| CG42669             | multiple | dense    | yes | multiple | single |
| CG33232             | multiple | single   | yes | single   | single |
| CG16758             | single   | #N/A     | -   | #N/A     | #N/A   |
| Spn                 | multiple | single   | yes | single   | dense  |
| msn                 | multiple | multiple | yes | multiple | dense  |
| Rpl8                | single   | multiple | yes | single   | dense  |
| dos                 | single   | multiple | yes | #N/A     | dense  |

|               |          |          |     |          |          |
|---------------|----------|----------|-----|----------|----------|
| CG9977        | multiple | #N/A     | -   | #N/A     | #N/A     |
| CG12093       | multiple | #N/A     | -   | #N/A     | #N/A     |
| Atg2          | multiple | single   | yes | #N/A     | #N/A     |
| mRpS35        | #N/A     | single   | -   | #N/A     | #N/A     |
| pgant6        | #N/A     | single   | -   | #N/A     | #N/A     |
| CG2083        | single   | single   | no  | #N/A     | #N/A     |
| CG14952       | multiple | #N/A     | -   | #N/A     | #N/A     |
| CG9973        | single   | dense    | yes | #N/A     | dense    |
| spz5          | #N/A     | multiple | -   | dense    | single   |
| CG2162        | #N/A     | single   | -   | #N/A     | #N/A     |
| CG32486       | multiple | dense    | yes | dense    | single   |
| CG11486       | multiple | dense    | yes | dense    | multiple |
| prominin-like | single   | single   | no  | #N/A     | #N/A     |
| CG11537       | single   | single   | no  | #N/A     | #N/A     |
| CG14960       | single   | #N/A     | -   | #N/A     | #N/A     |
| CG14968       | single   | #N/A     | -   | #N/A     | #N/A     |
| ZnT63C        | single   | #N/A     | -   | single   | #N/A     |
| CG14969       | single   | #N/A     | -   | #N/A     | single   |
| Drs-I         | single   | #N/A     | -   | #N/A     | single   |
| dro6          | single   | single   | no  | single   | single   |
| kst           | multiple | single   | yes | multiple | single   |
| sty           | dense    | dense    | no  | dense    | dense    |
| eIF5B         | single   | multiple | yes | single   | dense    |
| Eip63E        | single   | #N/A     | -   | #N/A     | #N/A     |
| CG10357       | #N/A     | single   | -   | #N/A     | #N/A     |
| CG14974       | #N/A     | multiple | -   | #N/A     | #N/A     |
| CG12029       | #N/A     | single   | -   | multiple | dense    |
| CG10862       | #N/A     | single   | -   | #N/A     | #N/A     |
| CG32264       | single   | single   | yes | dense    | dense    |
| enc           | #N/A     | dense    | -   | #N/A     | #N/A     |
| Awh           | #N/A     | dense    | -   | #N/A     | #N/A     |
| snRNA:U11     | #N/A     | single   | -   | #N/A     | #N/A     |
| scrt          | multiple | dense    | yes | single   | #N/A     |
| fd64A         | #N/A     | single   | -   | #N/A     | #N/A     |
| CG14995       | #N/A     | single   | -   | #N/A     | #N/A     |
| Fit1          | multiple | multiple | yes | single   | #N/A     |
| Ack           | multiple | multiple | no  | #N/A     | #N/A     |
| Chd64         | #N/A     | single   | -   | #N/A     | single   |
| nab           | #N/A     | single   | -   | #N/A     | #N/A     |
| mas           | single   | single   | yes | #N/A     | #N/A     |
| CG15005       | #N/A     | single   | -   | #N/A     | #N/A     |
| CG1295        | #N/A     | single   | -   | #N/A     | #N/A     |
| Cpr64Aa       | #N/A     | single   | -   | #N/A     | #N/A     |
| CG1332        | dense    | dense    | yes | dense    | single   |
| ImpL2         | dense    | dense    | yes | dense    | single   |
| ago           | multiple | multiple | no  | dense    | dense    |
| CG1265        | multiple | multiple | no  | #N/A     | dense    |
| CG15011       | multiple | multiple | no  | #N/A     | dense    |
| CG32240       | single   | #N/A     | -   | #N/A     | #N/A     |
| CG7447        | single   | #N/A     | -   | #N/A     | #N/A     |
| Syx17         | dense    | desne    | yes | #N/A     | dense    |
| CG15019       | dense    | dense    | yes | #N/A     | dense    |
| CG11347       | dense    | dense    | no  | single   | dense    |

|            |          |          |     |          |        |
|------------|----------|----------|-----|----------|--------|
| CG11353    | single   | #N/A     | -   | #N/A     | #N/A   |
| CG32243    | single   | #N/A     | -   | #N/A     | #N/A   |
| CG11357    | single   | multiple | yes | single   | single |
| CG33777    | #N/A     | single   | -   | #N/A     | single |
| Src64B     | multiple | dense    | yes | dense    | #N/A   |
| CG32246    | multiple | dense    | yes | dense    | #N/A   |
| Rpd3       | multiple | dense    | yes | dense    | #N/A   |
| CG13717    | multiple | dense    | yes | #N/A     | #N/A   |
| axo        | multiple | #N/A     | -   | #N/A     | #N/A   |
| CG34266    | multiple | #N/A     | -   | #N/A     | #N/A   |
| Gef64C     | dense    | #N/A     | -   | multiple | #N/A   |
| CG15876    | dense    | #N/A     | -   | #N/A     | #N/A   |
| CG13713    | dense    | #N/A     | -   | #N/A     | #N/A   |
| CG13711    | single   | #N/A     | -   | #N/A     | #N/A   |
| Con        | single   | single   | no  | single   | #N/A   |
| CG32232    | #N/A     | multiple | -   | #N/A     | #N/A   |
| CG12027    | #N/A     | single   | -   | #N/A     | #N/A   |
| CG34047    | single   | #N/A     | -   | #N/A     | #N/A   |
| shep       | #N/A     | dense    | -   | single   | single |
| Blimp-1    | dense    | dense    | no  | dense    | single |
| lin-28     | #N/A     | single   | -   | single   | single |
| sif        | single   | single   | no  | single   | single |
| DnaJ-1     | single   | #N/A     | -   | #N/A     | #N/A   |
| Ubp64E     | single   | #N/A     | -   | #N/A     | #N/A   |
| vn         | multiple | dense    | yes | dense    | #N/A   |
| CG32407    | #N/A     | single   | -   | #N/A     | #N/A   |
| CG33523    | single   | single   | yes | #N/A     | dense  |
| Bj1        | single   | #N/A     | -   | #N/A     | dense  |
| CG33993    | single   | multiple | yes | single   | #N/A   |
| CG10479    | dense    | dense    | no  | dense    | #N/A   |
| CG32406    | #N/A     | single   | -   | #N/A     | #N/A   |
| tan        | single   | single   | no  | #N/A     | #N/A   |
| CG6592     | single   | single   | no  | single   | #N/A   |
| CG10472    | single   | single   | no  | #N/A     | #N/A   |
| Ets65A     | single   | single   | no  | single   | #N/A   |
| l(3)mbn    | single   | single   | no  | single   | #N/A   |
| D19B       | single   | #N/A     | -   | #N/A     | #N/A   |
| D19A       | single   | #N/A     | -   | #N/A     | #N/A   |
| LanA       | dense    | dense    | no  | dense    | single |
| pncr008:3L | dense    | dense    | no  | #N/A     | single |
| CG13300    | #N/A     | multiple | -   | #N/A     | #N/A   |
| CG32398    | #N/A     | multiple | -   | #N/A     | #N/A   |
| CG14910    | single   | multiple | yes | #N/A     | #N/A   |
| CG10144    | #N/A     | single   | -   | single   | #N/A   |
| sfl        | #N/A     | single   | -   | single   | #N/A   |
| CG18769    | single   | #N/A     | -   | #N/A     | #N/A   |
| SP1173     | single   | single   | no  | multiple | #N/A   |
| dikar      | single   | single   | no  | single   | #N/A   |
| CG10107    | single   | multiple | yes | single   | #N/A   |
| CG8549     | #N/A     | single   | -   | #N/A     | #N/A   |
| CG10103    | #N/A     | single   | -   | #N/A     | #N/A   |
| CG32392    | single   | multiple | yes | #N/A     | #N/A   |
| vvl        | multiple | multiple | no  | #N/A     | #N/A   |

|             |          |          |     |          |        |
|-------------|----------|----------|-----|----------|--------|
| Prat2       | #N/A     | single   | -   | #N/A     | #N/A   |
| tow         | single   | single   | no  | #N/A     | #N/A   |
| CG10077     | single   | single   | no  | #N/A     | dense  |
| sgl         | single   | multiple | yes | single   | dense  |
| CG10064     | single   | multiple | yes | single   | dense  |
| G-ialpha65A | single   | #N/A     | -   | dense    | #N/A   |
| CR32385     | single   | #N/A     | -   | #N/A     | #N/A   |
| CG8628      | single   | single   | no  | #N/A     | #N/A   |
| Dbi         | single   | single   | no  | #N/A     | #N/A   |
| melt        | multiple | multiple | no  | single   | #N/A   |
| corn        | single   | multiple | yes | single   | single |
| CG8620      | single   | single   | no  | #N/A     | single |
| CG42256     | single   | #N/A     | -   | #N/A     | #N/A   |
| unc-13-4A   | multiple | single   | yes | single   | #N/A   |
| CG8607      | single   | #N/A     | -   | #N/A     | #N/A   |
| CG8596      | single   | #N/A     | -   | #N/A     | #N/A   |
| CG14834     | single   | #N/A     | -   | #N/A     | #N/A   |
| Srp19       | single   | #N/A     | -   | #N/A     | #N/A   |
| qm          | single   | #N/A     | -   | #N/A     | #N/A   |
| sec63       | #N/A     | single   | -   | #N/A     | dense  |
| Sh3beta     | single   | multiple | yes | #N/A     | dense  |
| akirin      | single   | single   | no  | single   | dense  |
| SMSr        | single   | #N/A     | -   | #N/A     | #N/A   |
| smid        | single   | #N/A     | -   | #N/A     | #N/A   |
| Rac2        | multiple | single   | yes | single   | #N/A   |
| CG14835     | multiple | single   | yes | #N/A     | #N/A   |
| sphinx1     | single   | single   | yes | #N/A     | #N/A   |
| sphinx2     | single   | #N/A     | -   | #N/A     | #N/A   |
| CG32373     | single   | #N/A     | -   | #N/A     | #N/A   |
| Ank2        | single   | #N/A     | -   | #N/A     | #N/A   |
| CG32369     | single   | single   | no  | #N/A     | dense  |
| Pdp1        | #N/A     | single   | -   | single   | dense  |
| CG32365     | #N/A     | single   | -   | single   | #N/A   |
| pbl         | multiple | single   | yes | #N/A     | dense  |
| CG8281      | multiple | single   | yes | #N/A     | dense  |
| CG8111      | multiple | #N/A     | -   | #N/A     | dense  |
| exex        | multiple | single   | yes | #N/A     | #N/A   |
| HP4         | #N/A     | single   | -   | #N/A     | dense  |
| CG8209      | #N/A     | single   | -   | #N/A     | dense  |
| CG8038      | #N/A     | multiple | -   | dense    | dense  |
| nmo         | multiple | multiple | yes | dense    | dense  |
| bip1        | single   | #N/A     | -   | #N/A     | single |
| Ect4        | multiple | dense    | yes | #N/A     | #N/A   |
| fan         | single   | #N/A     | -   | #N/A     | #N/A   |
| CG7927      | single   | #N/A     | -   | #N/A     | #N/A   |
| CG42330     | single   | #N/A     | -   | #N/A     | #N/A   |
| CR32028     | single   | #N/A     | -   | #N/A     | #N/A   |
| CG6983      | multiple | single   | yes | multiple | #N/A   |
| Gug         | multiple | multiple | yes | single   | single |
| ZC3H3       | single   | #N/A     | -   | single   | #N/A   |
| CG6745      | single   | #N/A     | -   | #N/A     | #N/A   |
| ergic53     | #N/A     | multiple | -   | single   | #N/A   |
| CG6486      | single   | multiple | yes | #N/A     | single |

|                   |          |          |      |          |          |
|-------------------|----------|----------|------|----------|----------|
| h                 | dense    | single   | yes  | #N/A     | #N/A     |
| Fhos              | single   | single   | yes  | #N/A     | #N/A     |
| dally             | multiple | dense    | yes  | dense    | multiple |
| CG32026           | single   | dense    | yes  | dense    | single   |
| CG5087            | dense    | dense    | no   | dense    | #N/A     |
| Doc3              | dense    | dense    | no   | dense    | #N/A     |
| CG5194            | single   | dense    | yes  | #N/A     | #N/A     |
| Doc2              | dense    | dense    | yes  | dense    | #N/A     |
| Doc1              | multiple | dense    | yes  | multiple | #N/A     |
| CG5144            | #N/A     | dense    | -    | #N/A     | #N/A     |
| bol               | #N/A     | multiple | -    | #N/A     | #N/A     |
| Klp67A            | single   | single   | no   | #N/A     | #N/A     |
| CG4452            | single   | multiple | yes  | #N/A     | #N/A     |
| Fdxh              | single   | multiple | yes  | #N/A     | #N/A     |
| Hsp67Bc           | single   | multiple | yes  | #N/A     | #N/A     |
| Hsp22             | #N/A     | single   | -    | #N/A     | #N/A     |
| Hsp67Bb           | #N/A     | single   | -    | #N/A     | #N/A     |
| CG4461            | #N/A     | single   | -    | #N/A     | #N/A     |
| CG33926           | single   | single   | no   | #N/A     | #N/A     |
| CG3529            | single   | single   | no   | #N/A     | #N/A     |
| CG3448            | single   | single   | no   | #N/A     | #N/A     |
| CG3552            | single   | dense    | yes  | #N/A     | dense    |
| CG3434            | single   | dense    | yes  | dense    | dense    |
| CG32043           | single   | dense    | yes  | dense    | dense    |
| CG8177            | multiple | #N/A     | -    | #N/A     | single   |
| llp3              | single   | #N/A     | -    | #N/A     | #N/A     |
| llp4              | single   | #N/A     | -    | #N/A     | #N/A     |
| CG32052           | single   | #N/A     | -    | #N/A     | #N/A     |
| Gap1              | dense    | dense    | same | dense    | dense    |
| CG10809           | dense    | dense    | yes  | #N/A     | dense    |
| iPLA2-VIA         | dense    | dense    | yes  | #N/A     | #N/A     |
| mir-276b          | single   | multiple | yes  | #N/A     | #N/A     |
| CG32060           | single   | #N/A     | -    | #N/A     | #N/A     |
| lr67b             | single   | #N/A     | -    | #N/A     | #N/A     |
| lr67c             | single   | #N/A     | -    | #N/A     | #N/A     |
| CG32062           | multiple | multiple | yes  | #N/A     | #N/A     |
| CG6527            | #N/A     | single   | -    | #N/A     | #N/A     |
| CG32066           | single   | #N/A     | -    | single   | dense    |
| simj              | #N/A     | single   | -    | multiple | dense    |
| NijA              | single   | #N/A     | -    | #N/A     | #N/A     |
| tna               | dense    | dense    | yes  | dense    | dense    |
| Aps               | #N/A     | single   | -    | #N/A     | #N/A     |
| CG34050           | single   | #N/A     | -    | #N/A     | #N/A     |
| CG14147           | single   | single   | no   | #N/A     | #N/A     |
| klu               | single   | multiple | yes  | multiple | #N/A     |
| snoRNA:Me18S-G962 | #N/A     | multiple | -    | #N/A     | #N/A     |
| Fad2              | #N/A     | multiple | -    | #N/A     | #N/A     |
| CG6327            | single   | #N/A     | -    | #N/A     | #N/A     |
| CG34239           | single   | #N/A     | -    | #N/A     | #N/A     |
| CG7839            | #N/A     | single   | -    | #N/A     | #N/A     |
| JIL-1             | #N/A     | single   | -    | #N/A     | single   |
| CG32082           | multiple | single   | yes  | #N/A     | #N/A     |
| CG6216            | single   | #N/A     | -    | #N/A     | #N/A     |



|           |          |          |     |          |        |
|-----------|----------|----------|-----|----------|--------|
| Ir68a     | single   | multiple | yes | dense    | #N/A   |
| scyl      | multiple | dense    | yes | multiple | #N/A   |
| CG6175    | multiple | #N/A     | -   | #N/A     | #N/A   |
| CG6168    | single   | multiple | yes | #N/A     | #N/A   |
| CG6163    | single   | dense    | yes | #N/A     | #N/A   |
| CG11726   | #N/A     | multiple | -   | #N/A     | #N/A   |
| CG7560    | #N/A     | multiple | -   | #N/A     | #N/A   |
| Vha16-3   | #N/A     | single   | -   | #N/A     | single |
| Vha16-2   | #N/A     | single   | -   | #N/A     | single |
| CG7543    | single   | single   | no  | #N/A     | #N/A   |
| chrB      | dense    | multiple | yes | single   | #N/A   |
| Mob2      | single   | dense    | yes | dense    | dense  |
| CG32086   | #N/A     | single   | -   | #N/A     | #N/A   |
| rt        | #N/A     | single   | -   | #N/A     | #N/A   |
| CG7377    | #N/A     | single   | -   | #N/A     | #N/A   |
| CG14135   | single   | #N/A     | -   | #N/A     | #N/A   |
| CG11652   | single   | #N/A     | -   | #N/A     | #N/A   |
| CG6053    | single   | #N/A     | -   | #N/A     | #N/A   |
| CG6024    | single   | #N/A     | -   | multiple | single |
| Gr68a     | single   | #N/A     | -   | #N/A     | #N/A   |
| CycA      | multiple | dense    | yes | single   | #N/A   |
| CG7264    | multiple | dense    | yes | #N/A     | #N/A   |
| CG11588   | single   | #N/A     | -   | #N/A     | #N/A   |
| CG5718    | single   | #N/A     | -   | #N/A     | #N/A   |
| prc       | dense    | #N/A     | -   | #N/A     | #N/A   |
| rols      | single   | dense    | yes | dense    | #N/A   |
| Sema-5c   | dense    | dense    | yes | dense    | dense  |
| CG17154   | single   | #N/A     | -   | #N/A     | #N/A   |
| l(3)j2D3  | single   | #N/A     | -   | #N/A     | #N/A   |
| yps       | #N/A     | single   | -   | #N/A     | dense  |
| Ir68b     | #N/A     | single   | -   | #N/A     | dense  |
| CG34241   | #N/A     | single   | -   | #N/A     | #N/A   |
| CG5645    | single   | #N/A     | -   | #N/A     | #N/A   |
| Atg12     | single   | #N/A     | -   | #N/A     | #N/A   |
| l(3)neo18 | single   | #N/A     | -   | #N/A     | #N/A   |
| RhoGAP68F | single   | #N/A     | -   | #N/A     | #N/A   |
| Nrx-IV    | #N/A     | single   | -   | #N/A     | #N/A   |
| eap       | #N/A     | single   | -   | #N/A     | #N/A   |
| Est-P     | single   | #N/A     | -   | #N/A     | #N/A   |
| thoc6     | single   | #N/A     | -   | #N/A     | #N/A   |
| CG11529   | single   | #N/A     | -   | #N/A     | #N/A   |
| app       | single   | #N/A     | -   | #N/A     | #N/A   |
| Ncc69     | single   | single   | no  | single   | #N/A   |
| eyg       | single   | multiple | yes | single   | #N/A   |
| CG32102   | single   | single   | no  | single   | #N/A   |
| sowah     | single   | multiple | yes | #N/A     | #N/A   |
| ara       | single   | multiple | yes | #N/A     | #N/A   |
| caup      | single   | multiple | yes | #N/A     | #N/A   |
| CG32111   | multiple | dense    | yes | dense    | #N/A   |
| mirr      | single   | dense    | yes | dense    | #N/A   |
| snRNP69D  | #N/A     | single   | -   | #N/A     | #N/A   |
| CG10984   | single   | #N/A     | -   | #N/A     | #N/A   |
| CG10973   | single   | #N/A     | -   | #N/A     | #N/A   |

|                     |          |          |     |          |          |
|---------------------|----------|----------|-----|----------|----------|
| CG32113             | single   | #N/A     | -   | #N/A     | #N/A     |
| Atg1                | #N/A     | single   | -   | single   | #N/A     |
| CG10749             | single   | #N/A     | -   | #N/A     | #N/A     |
| SRm160              | single   | #N/A     | -   | #N/A     | #N/A     |
| RpS4                | single   | #N/A     | -   | #N/A     | #N/A     |
| snoRNA:Psi28S-3327a | single   | #N/A     | -   | #N/A     | #N/A     |
| snoRNA:Psi28S-3327b | single   | #N/A     | -   | #N/A     | #N/A     |
| snoRNA:Psi28S-3327c | multiple | dense    | yes | #N/A     | #N/A     |
| Syx13               | multiple | #N/A     | -   | #N/A     | #N/A     |
| CG11279             | single   | #N/A     | -   | #N/A     | #N/A     |
| CG14115             | #N/A     | single   | -   | #N/A     | single   |
| CG34428             | #N/A     | single   | -   | #N/A     | single   |
| CG17300             | dense    | #N/A     | -   | single   | #N/A     |
| CG32118             | #N/A     | multiple | -   | #N/A     | #N/A     |
| trn                 | multiple | dense    | yes | dense    | dense    |
| CG33262             | #N/A     | multiple | -   | #N/A     | #N/A     |
| caps                | single   | single   | no  | dense    | #N/A     |
| tRNA:CR32123:Psi    | #N/A     | single   | -   | #N/A     | #N/A     |
| Sfp70A4             | single   | multiple | yes | #N/A     | #N/A     |
| CG42481             | single   | single   | no  | #N/A     | #N/A     |
| Acp70A              | single   | #N/A     | -   | #N/A     | #N/A     |
| SNCF                | single   | #N/A     | -   | #N/A     | #N/A     |
| CG14111             | single   | #N/A     | -   | #N/A     | #N/A     |
| CG14107             | single   | #N/A     | -   | #N/A     | #N/A     |
| CG10191             | #N/A     | dense    | -   | #N/A     | #N/A     |
| sens                | single   | dense    | yes | #N/A     | single   |
| CG10222             | single   | single   | no  | dense    | single   |
| CG10741             | single   | #N/A     | -   | #N/A     | #N/A     |
| CG8757              | multiple | #N/A     | -   | #N/A     | #N/A     |
| Hml                 | single   | single   | no  | single   | #N/A     |
| CG8745              | single   | single   | no  | #N/A     | #N/A     |
| Rgl                 | single   | single   | yes | multiple | #N/A     |
| CG8833              | single   | #N/A     | -   | single   | #N/A     |
| CG9007              | single   | #N/A     | -   | single   | #N/A     |
| ptip                | single   | #N/A     | -   | #N/A     | #N/A     |
| l(3)70Da            | multiple | multiple | no  | #N/A     | #N/A     |
| btl                 | multiple | multiple | no  | single   | #N/A     |
| Sox21b              | dense    | dense    | yes | multiple | #N/A     |
| D                   | multiple | multiple | yes | dense    | #N/A     |
| nan                 | dense    | dense    | yes | #N/A     | single   |
| nuf                 | dense    | dense    | yes | dense    | multiple |
| CG32141             | #N/A     | single   | -   | #N/A     | single   |
| CG7768              | single   | #N/A     | -   | #N/A     | #N/A     |
| fz                  | multiple | dense    | yes | multiple | dense    |
| stwl                | single   | #N/A     | -   | single   | #N/A     |
| CG3919              | single   | #N/A     | -   | single   | #N/A     |
| bbg                 | multiple | multiple | no  | multiple | single   |
| CG9238              | single   | multiple | yes | multiple | #N/A     |
| HGTX                | multiple | multiple | yes | multiple | #N/A     |
| shd                 | #N/A     | multiple | -   | #N/A     | #N/A     |
| CG9628              | single   | #N/A     | -   | #N/A     | #N/A     |
| RecQ5               | multiple | dense    | yes | dense    | single   |
| dlp                 | multiple | dense    | yes | dense    | single   |

|           |          |          |     |          |        |
|-----------|----------|----------|-----|----------|--------|
| CG42507   | multiple | dense    | yes | dense    | #N/A   |
| Trl       | multiple | dense    | yes | dense    | #N/A   |
| CG33260   | single   | dense    | yes | dense    | #N/A   |
| CG9384    | single   | dense    | yes | #N/A     | #N/A   |
| CG17173   | single   | #N/A     | -   | #N/A     | #N/A   |
| mop       | multiple | single   | yes | #N/A     | #N/A   |
| bmm       | multiple | single   | yes | dense    | #N/A   |
| CG13472   | multiple | #N/A     | -   | dense    | #N/A   |
| CG42247   | single   | #N/A     | -   | #N/A     | single |
| CG13465   | single   | #N/A     | -   | #N/A     | single |
| BobA      | single   | multiple | yes | dense    | single |
| Tom       | dense    | dense    | no  | dense    | dense  |
| Brd       | dense    | dense    | no  | dense    | #N/A   |
| Ocho      | dense    | dense    | no  | dense    | #N/A   |
| CG3349    | dense    | dense    | no  | dense    | #N/A   |
| CG5114    | single   | dense    | yes | dense    | #N/A   |
| mind      | single   | #N/A     | -   | dense    | #N/A   |
| CG10006   | #N/A     | single   | -   | #N/A     | #N/A   |
| mRpl39    | #N/A     | single   | -   | #N/A     | #N/A   |
| Prosbeta2 | #N/A     | multiple | -   | #N/A     | #N/A   |
| Reck      | #N/A     | multiple | -   | single   | #N/A   |
| Sytbody   | multiple | multiple | yes | multiple | #N/A   |
| Rpn12R    | single   | multiple | yes | #N/A     | #N/A   |
| ind       | single   | multiple | yes | #N/A     | #N/A   |
| CG18581   | single   | #N/A     | -   | #N/A     | #N/A   |
| CG12310   | single   | #N/A     | -   | #N/A     | #N/A   |
| CG13461   | single   | #N/A     | -   | #N/A     | #N/A   |
| CG6854    | single   | #N/A     | -   | #N/A     | #N/A   |
| Cep135    | multiple | multiple | yes | #N/A     | #N/A   |
| CG16959   | multiple | multiple | yes | #N/A     | #N/A   |
| CG32847   | multiple | multiple | yes | #N/A     | #N/A   |
| CG13457   | multiple | multiple | yes | #N/A     | #N/A   |
| Pdi       | #N/A     | single   | -   | #N/A     | dense  |
| CG32147   | #N/A     | single   | -   | #N/A     | dense  |
| CG6859    | #N/A     | single   | -   | #N/A     | dense  |
| CG7011    | #N/A     | single   | -   | #N/A     | #N/A   |
| Tollo     | dense    | dense    | no  | dense    | #N/A   |
| Best3     | #N/A     | single   | -   | #N/A     | #N/A   |
| CG7255    | dense    | dense    | yes | dense    | #N/A   |
| Toll-6    | multiple | dense    | yes | dense    | #N/A   |
| CG7841    | single   | #N/A     | -   | single   | #N/A   |
| Z600      | single   | #N/A     | -   | #N/A     | #N/A   |
| gdl-ORF39 | single   | #N/A     | -   | #N/A     | #N/A   |
| gdl       | single   | #N/A     | -   | #N/A     | #N/A   |
| Eip71CD   | single   | #N/A     | -   | #N/A     | #N/A   |
| CrebA     | single   | dense    | yes | multiple | single |
| comm3     | multiple | multiple | yes | multiple | dense  |
| CG7372    | #N/A     | single   | -   | single   | #N/A   |
| Eig71Ei   | #N/A     | single   | -   | #N/A     | #N/A   |
| Eig71Ej   | #N/A     | single   | -   | #N/A     | #N/A   |
| Eig71Ek   | #N/A     | multiple | -   | #N/A     | #N/A   |
| CG7304    | #N/A     | dense    | -   | #N/A     | #N/A   |
| pgant8    | single   | dense    | -   | #N/A     | #N/A   |

|           |          |          |     |        |        |
|-----------|----------|----------|-----|--------|--------|
| CG34452   | single   | dense    | -   | single | #N/A   |
| CG34451   | single   | dense    |     | dense  | #N/A   |
| comm2     | dense    | dense    | yes | dense  | #N/A   |
| CG42571   | dense    | dense    | yes | #N/A   | #N/A   |
| comm      | single   | multiple | yes | dense  | dense  |
| CG6244    | multiple | dense    | yes | single | #N/A   |
| CG13445   | #N/A     | single   | -   | #N/A   | #N/A   |
| CG6151    | #N/A     | single   | -   | dense  | #N/A   |
| dbo       | single   | single   | no  | single | #N/A   |
| CG12713   | single   | single   | no  | single | #N/A   |
| CG18081   | single   | single   | no  | single | #N/A   |
| CG32150   | #N/A     | single   | -   | dense  | #N/A   |
| mir-263b  | single   | #N/A     | -   | #N/A   | #N/A   |
| pHCl      | single   | single   | no  | single | #N/A   |
| Pka-C3    | single   | #N/A     | -   | single | #N/A   |
| mib1      | #N/A     | multiple | -   | #N/A   | dense  |
| Notum     | dense    | dense    | yes | dense  | dense  |
| th        | dense    | dense    | no  | dense  | dense  |
| Mbs       | #N/A     | dense    | -   | dense  | #N/A   |
| Zn72D     | multiple | #N/A     | -   | #N/A   | #N/A   |
| Taf4      | multiple | #N/A     | -   | #N/A   | #N/A   |
| roq       | single   | single   | no  | #N/A   | #N/A   |
| CG4753    | single   | single   | no  | #N/A   | #N/A   |
| CG4729    | single   | single   | no  | #N/A   | #N/A   |
| CG4680    | single   | #N/A     | -   | #N/A   | #N/A   |
| CG13035   | single   | #N/A     | -   | #N/A   | #N/A   |
| fax       | single   | dense    | yes | single | dense  |
| TMS1      | single   | dense    | yes | #N/A   | dense  |
| CG33158   | dense    | dense    | no  | dense  | dense  |
| argos     | dense    | dense    | no  | dense  | dense  |
| CG42513   | dense    | dense    | no  | dense  | #N/A   |
| CG42514   | dense    | dense    | no  | dense  | #N/A   |
| CG13033   | single   | #N/A     | -   | #N/A   | #N/A   |
| Mipp1     | #N/A     | single   | -   | single | #N/A   |
| CG4169    | single   | #N/A     | -   | #N/A   | #N/A   |
| Syx8      | single   | #N/A     | -   | #N/A   | #N/A   |
| CG32163   | single   | #N/A     | -   | #N/A   | #N/A   |
| l(3)73Ah  | single   | #N/A     | -   | #N/A   | #N/A   |
| tra       | single   | #N/A     | -   | #N/A   | #N/A   |
| spd-2     | single   | #N/A     | -   | #N/A   | #N/A   |
| Abl       | single   | single   | yes | #N/A   | single |
| Baldspot  | single   | multiple | yes | dense  | single |
| Galpha73B | single   | single   | no  | dense  | #N/A   |
| Lasp      | multiple | multiple | no  | single | dense  |
| Dab       | multiple | multiple | no  | single | dense  |
| Nrt       | single   | dense    | yes | dense  | #N/A   |
| TSG101    | #N/A     | single   | -   | #N/A   | #N/A   |
| CG9669    | #N/A     | single   | -   | #N/A   | #N/A   |
| CG9715    | #N/A     | single   | -   | #N/A   | #N/A   |
| CG32161   | #N/A     | single   | -   | #N/A   | #N/A   |
| Exn       | single   | #N/A     | -   | single | single |
| CG3764    | #N/A     | single   | -   | #N/A   | #N/A   |
| CG6664    | multiple | single   | yes | #N/A   | #N/A   |

|                  |          |          |     |          |          |
|------------------|----------|----------|-----|----------|----------|
| Rbp6             | multiple | single   | yes | #N/A     | #N/A     |
| CG6485           | single   | single   | no  | #N/A     | #N/A     |
| CG13724          | single   | single   | no  | #N/A     | #N/A     |
| CG13725          | single   | single   | no  | #N/A     | #N/A     |
| tap              | #N/A     | single   | -   | single   | #N/A     |
| Cad74A           | single   | multiple | yes | #N/A     | #N/A     |
| CG13728          | single   | single   | no  | #N/A     | #N/A     |
| blot             | single   | dense    | yes | multiple | single   |
| CG7630           | #N/A     | single   | -   | #N/A     | #N/A     |
| CG33051          | #N/A     | single   | -   | #N/A     | #N/A     |
| CG32174          | #N/A     | single   | -   | #N/A     | #N/A     |
| frc              | #N/A     | single   | -   | #N/A     | #N/A     |
| CG33052          | #N/A     | single   | -   | #N/A     | #N/A     |
| CG18265          | multiple | single   | yes | #N/A     | #N/A     |
| CG6333           | single   | single   | no  | #N/A     | #N/A     |
| Oatp74D          | single   | multiple | yes | single   | single   |
| CG32185          | #N/A     | single   | -   | #N/A     | #N/A     |
| Edc3             | single   | #N/A     | -   | #N/A     | #N/A     |
| Nedd4            | single   | #N/A     | -   | #N/A     | #N/A     |
| Eip74EF          | single   | #N/A     | -   | multiple | #N/A     |
| Pep              | multiple | single   | yes | #N/A     | #N/A     |
| CG32177          | multiple | multiple | yes | dense    | single   |
| Krn              | multiple | single   | yes | dense    | single   |
| CG7484           | single   | single   | no  | #N/A     | single   |
| Adgf-A           | #N/A     | multiple | -   | single   | #N/A     |
| Msi              | #N/A     | multiple | -   | single   | #N/A     |
| CG32182          | #N/A     | multiple | -   | single   | #N/A     |
| CG32181          | #N/A     | multiple | -   | #N/A     | #N/A     |
| CG5589           | single   | #N/A     | -   | #N/A     | #N/A     |
| CG32187          | single   | #N/A     | -   | #N/A     | #N/A     |
| CG32191          | single   | #N/A     | -   | #N/A     | #N/A     |
| cln3             | single   | #N/A     | -   | #N/A     | #N/A     |
| CG7408           | single   | #N/A     | -   | #N/A     | #N/A     |
| Prestin          | single   | #N/A     | -   | #N/A     | #N/A     |
| Eip75B           | multiple | dense    | yes | dense    | multiple |
| snoRNA:Me28S-A30 | single   | dense    | yes | #N/A     | #N/A     |
| CG34253          | single   | #N/A     | -   | #N/A     | #N/A     |
| CG13698          | multiple | #N/A     | -   | #N/A     | #N/A     |
| mRps26           | single   | #N/A     | -   | #N/A     | #N/A     |
| CG5147           | single   | #N/A     | -   | #N/A     | #N/A     |
| gk               | multiple | single   | yes | single   | #N/A     |
| W                | single   | single   | no  | dense    | #N/A     |
| CG7320           | #N/A     | dense    | -   | #N/A     | #N/A     |
| CheA75a          | multiple | multiple | no  | #N/A     | #N/A     |
| CG5103           | #N/A     | multiple | -   | #N/A     | single   |
| CG13700          | #N/A     | single   | -   | #N/A     | #N/A     |
| grim             | #N/A     | multiple | -   | #N/A     | #N/A     |
| rpr              | dense    | dense    | no  | dense    | #N/A     |
| skl              | multiple | multiple | no  | single   | #N/A     |
| AICR2            | multiple | #N/A     | -   | #N/A     | single   |
| CG7271           | dense    | #N/A     | -   | #N/A     | #N/A     |
| term             | dense    | #N/A     | -   | #N/A     | #N/A     |
| tRNA:CR32200     | single   | single   | no  | #N/A     | #N/A     |

|          |          |          |     |          |        |
|----------|----------|----------|-----|----------|--------|
| not      | single   | single   | no  | #N/A     | #N/A   |
| bora     | single   | single   | no  | #N/A     | single |
| MYPT-75D | multiple | single   | yes | dense    | single |
| ftz-f1   | multiple | #N/A     | -   | #N/A     | single |
| Indy     | single   | multiple | yes | multiple | single |
| CG32027  | single   | single   | no  | #N/A     | single |
| mir-315  | #N/A     | single   | -   | #N/A     | #N/A   |
| CG3819   | single   | single   | no  | #N/A     | #N/A   |
| CG32204  | multiple | single   | yes | #N/A     | #N/A   |
| nkd      | dense    | dense    | no  | dense    | dense  |
| Acp76A   | #N/A     | dense    | -   | #N/A     | #N/A   |
| CG3797   | single   | single   | no  | single   | #N/A   |
| CG6812   | dense    | single   | yes | single   | #N/A   |
| Mkp3     | dense    | dense    | yes | single   | dense  |
| fz2      | multiple | dense    | yes | dense    | #N/A   |
| fal      | single   | single   | no  | single   | #N/A   |
| Cpr76Ba  | single   | #N/A     | -   | #N/A     | #N/A   |
| Cpr76Bb  | single   | #N/A     | -   | #N/A     | #N/A   |
| CG9300   | dense    | dense    | no  | dense    | single |
| mir-9a   | single   | single   | no  | #N/A     | #N/A   |
| Shal     | multiple | multiple | no  | #N/A     | #N/A   |
| CG9231   | #N/A     | single   | -   | #N/A     | #N/A   |
| CG9330   | #N/A     | single   | -   | #N/A     | #N/A   |
| CG14100  | #N/A     | single   | -   | #N/A     | #N/A   |
| wnd      | multiple | single   | yes | single   | #N/A   |
| CG8786   | multiple | single   | yes | single   | single |
| CG8765   | single   | single   | no  | #N/A     | dense  |
| CG42637  | single   | #N/A     | -   | #N/A     | #N/A   |
| CG42636  | single   | #N/A     | -   | #N/A     | #N/A   |
| HLH106   | single   | #N/A     | -   | #N/A     | #N/A   |
| Mi-2     | dense    | dense    | no  | dense    | #N/A   |
| Su(Tpl)  | dense    | dense    | no  | dense    | #N/A   |
| CG7757   | multiple | dense    | yes | #N/A     | #N/A   |
| Mtr3     | single   | #N/A     | -   | #N/A     | #N/A   |
| Rpn1     | single   | #N/A     | -   | #N/A     | #N/A   |
| Ac76E    | single   | #N/A     | -   | #N/A     | #N/A   |
| CG7668   | #N/A     | single   | -   | #N/A     | #N/A   |
| kug      | multiple | single   | yes | #N/A     | #N/A   |
| CG14183  | single   | #N/A     | -   | #N/A     | #N/A   |
| CG14186  | single   | #N/A     | -   | #N/A     | #N/A   |
| CG6597   | single   | single   | no  | single   | #N/A   |
| polo     | single   | single   | no  | single   | #N/A   |
| Snap     | single   | single   | no  | #N/A     | #N/A   |
| trbl     | dense    | dense    | yes | #N/A     | #N/A   |
| CG13248  | #N/A     | dense    | -   | #N/A     | #N/A   |
| CG5910   | #N/A     | single   | -   | single   | #N/A   |
| CG32425  | multiple | #N/A     | -   | #N/A     | #N/A   |
| CG17637  | single   | #N/A     | -   | #N/A     | #N/A   |
| CG5078   | single   | #N/A     | -   | #N/A     | #N/A   |
| CG5059   | single   | #N/A     | -   | #N/A     | #N/A   |
| mTerf3   | single   | #N/A     | -   | #N/A     | #N/A   |
| knrl     | multiple | multiple | no  | dense    | dense  |
| CG13251  | single   | dense    | yes | #N/A     | #N/A   |

|                       |          |          |     |          |        |
|-----------------------|----------|----------|-----|----------|--------|
| kni                   | dense    | multiple | yes | multiple | single |
| CG11399               | single   | single   | no  | single   | #N/A   |
| CG11396               | single   | multiple | yes | single   | #N/A   |
| Six4                  | single   | multiple | yes | single   | single |
| CG3698                | single   | #N/A     | -   | #N/A     | single |
| CG4365                | single   | #N/A     | -   | #N/A     | #N/A   |
| fng                   | #N/A     | multiple | -   | single   | single |
| CG33286               | single   | #N/A     | -   | #N/A     | #N/A   |
| CR33283               | single   | #N/A     | -   | #N/A     | #N/A   |
| CG12984               | #N/A     | dense    | -   | single   | #N/A   |
| skd                   | multiple | dense    | yes | dense    | single |
| CG10585               | single   | dense    | yes | dense    | #N/A   |
| CG10584               | single   | dense    | yes | #N/A     | #N/A   |
| CG10581               | single   | single   | no  | #N/A     | #N/A   |
| siz                   | dense    | dense    | no  | dense    | dense  |
| CG10565               | single   | #N/A     | -   | #N/A     | #N/A   |
| Ac78C                 | single   | #N/A     | -   | #N/A     | single |
| chb                   | multiple | #N/A     | -   | #N/A     | #N/A   |
| asparagine-synthetase | multiple | #N/A     | -   | #N/A     | #N/A   |
| CG33054               | single   | #N/A     | -   | #N/A     | #N/A   |
| CG33056               | single   | #N/A     | -   | #N/A     | #N/A   |
| CG10512               | single   | #N/A     | -   | #N/A     | #N/A   |
| Eip78C                | single   | single   | no  | multiple | #N/A   |
| AcCoAS                | single   | single   | no  | single   | #N/A   |
| ppl                   | #N/A     | single   | -   | #N/A     | #N/A   |
| CG12974               | #N/A     | single   | -   | #N/A     | dense  |
| pzg                   | #N/A     | single   | -   | #N/A     | dense  |
| Cpr78Cb               | single   | #N/A     | -   | #N/A     | #N/A   |
| Edg78E                | single   | #N/A     | -   | #N/A     | #N/A   |
| Cpr78Cc               | single   | #N/A     | -   | #N/A     | #N/A   |
| Pc                    | single   | #N/A     | -   | single   | #N/A   |
| Rab26                 | single   | #N/A     | -   | #N/A     | #N/A   |
| CG7324                | #N/A     | single   | -   | #N/A     | #N/A   |
| CG32436               | #N/A     | single   | -   | single   | #N/A   |
| CG12972               | #N/A     | single   | -   | single   | #N/A   |
| Syx7                  | multiple | multiple | yes | #N/A     | #N/A   |
| croc                  | dense    | multiple | yes | dense    | #N/A   |
| Neu2                  | single   | #N/A     | -   | #N/A     | #N/A   |
| CG7202                | single   | #N/A     | -   | #N/A     | #N/A   |
| CG7519                | single   | #N/A     | -   | #N/A     | #N/A   |
| Hr78                  | multiple | #N/A     | -   | #N/A     | #N/A   |
| CG33214               | single   | #N/A     | -   | #N/A     | #N/A   |
| SAK                   | single   | #N/A     | -   | single   | #N/A   |
| CG7597                | single   | #N/A     | -   | #N/A     | #N/A   |
| AP-2                  | single   | #N/A     | -   | #N/A     | #N/A   |
| CG32445               | #N/A     | dense    | -   | #N/A     | #N/A   |
| Atox1                 | #N/A     | dense    | -   | single   | #N/A   |
| CG33291               | #N/A     | dense    | -   | #N/A     | #N/A   |
| CG32447               | #N/A     | single   | -   | #N/A     | #N/A   |
| CG42552               | #N/A     | single   | -   | #N/A     | #N/A   |
| mub                   | multiple | single   | yes | single   | #N/A   |
| DNApol-eta            | #N/A     | single   | -   | #N/A     | #N/A   |
| CG14562               | #N/A     | single   | -   | #N/A     | #N/A   |

|              |          |          |     |          |          |
|--------------|----------|----------|-----|----------|----------|
| CG7458       | #N/A     | multiple | -   | #N/A     | #N/A     |
| CR34262      | #N/A     | multiple | -   | #N/A     | #N/A     |
| CS-2         | #N/A     | single   | -   | #N/A     | #N/A     |
| CG7140       | #N/A     | single   | -   | #N/A     | #N/A     |
| TyrR         | multiple | #N/A     | -   | #N/A     | #N/A     |
| CG14561      | multiple | #N/A     | -   | #N/A     | #N/A     |
| CG7139       | multiple | #N/A     | -   | #N/A     | #N/A     |
| olf413       | multiple | dense    | yes | multiple | dense    |
| CG15374      | single   | dense    | yes | #N/A     | #N/A     |
| Ddx1         | single   | single   | no  | #N/A     | #N/A     |
| CG11523      | single   | single   | no  | single   | #N/A     |
| Csp          | single   | single   | no  | single   | #N/A     |
| Ten-m        | dense    | dense    | yes | dense    | single   |
| CG11449      | #N/A     | single   | -   | #N/A     | #N/A     |
| CG14457      | #N/A     | single   | -   | single   | #N/A     |
| jim          | single   | #N/A     | -   | #N/A     | #N/A     |
| tRNA:CR32460 | single   | #N/A     | -   | #N/A     | #N/A     |
| CG32462      | single   | #N/A     | -   | #N/A     | #N/A     |
| CG12768      | single   | #N/A     | -   | #N/A     | #N/A     |
| Mes2         | #N/A     | dense    | -   | #N/A     | #N/A     |
| nrm          | multiple | #N/A     | -   | single   | #N/A     |
| CG41452      | single   | #N/A     | -   | #N/A     | #N/A     |
| CR34031      | single   | #N/A     | -   | #N/A     | #N/A     |
| alpha-Cat    | single   | #N/A     | -   | #N/A     | #N/A     |
| AGO3         | single   | #N/A     | -   | #N/A     | #N/A     |
| CG40470      | single   | #N/A     | -   | #N/A     | #N/A     |
| CG12581      | single   | single   | no  | single   | #N/A     |
| CG14641      | single   | #N/A     | -   | #N/A     | #N/A     |
| abs          | single   | #N/A     | -   | #N/A     | #N/A     |
| Gel          | single   | #N/A     | -   | #N/A     | #N/A     |
| CG9772       | single   | single   | no  | #N/A     | #N/A     |
| CG1103       | single   | single   | no  | single   | #N/A     |
| hkb          | dense    | multiple | yes | #N/A     | #N/A     |
| CG1090       | #N/A     | single   | -   | single   | #N/A     |
| CG11739      | single   | #N/A     | -   | #N/A     | #N/A     |
| Cont         | single   | #N/A     | -   | #N/A     | #N/A     |
| Spargel      | #N/A     | single   | -   | single   | #N/A     |
| CG31525      | #N/A     | single   | -   | single   | #N/A     |
| eIF3-S10     | single   | multiple | yes | #N/A     | #N/A     |
| CG1074       | single   | single   | no  | #N/A     | #N/A     |
| CG9804       | single   | single   | no  | #N/A     | #N/A     |
| CG31522      | multiple | multiple | yes | #N/A     | #N/A     |
| CG31523      | multiple | single   | yes | #N/A     | #N/A     |
| CG14651      | single   | single   | no  | #N/A     | #N/A     |
| CG9775       | single   | #N/A     | -   | #N/A     | #N/A     |
| CG18271      | single   | #N/A     | -   | #N/A     | #N/A     |
| MED31        | single   | #N/A     | -   | #N/A     | #N/A     |
| CG12001      | single   | multiple | yes | #N/A     | #N/A     |
| CG31531      | multiple | multiple | no  | multiple | single   |
| Nep2         | single   | #N/A     | -   | #N/A     | single   |
| tacc         | single   | dense    | yes | single   | multiple |
| CG42574      | single   | dense    | yes | dense    | multiple |
| Hus1-like    | multiple | dense    | yes | dense    | single   |



|                     |          |          |     |          |        |
|---------------------|----------|----------|-----|----------|--------|
| CG1129              | single   | dense    | yes | #N/A     | single |
| CG1126              | #N/A     | dense    | -   | #N/A     | #N/A   |
| CG14658             | single   | #N/A     | -   | #N/A     | #N/A   |
| CG14659             | single   | #N/A     | -   | #N/A     | #N/A   |
| opa                 | dense    | dense    | yes | dense    | dense  |
| laf                 | #N/A     | single   | -   | single   | #N/A   |
| Gnf1                | single   | multiple | yes | single   | #N/A   |
| Cdep                | single   | single   | no  | dense    | #N/A   |
| UbcD6               | #N/A     | single   | -   | single   | single |
| CG14661             | #N/A     | single   | -   | #N/A     | single |
| CG2016              | multiple | single   | yes | single   | #N/A   |
| CG1124              | multiple | single   | yes | #N/A     | #N/A   |
| CG14662             | single   | dense    | yes | #N/A     | single |
| CG2022              | multiple | dense    | yes | multiple | #N/A   |
| corto               | dense    | dense    | yes | dense    | #N/A   |
| CG12007             | dense    | single   | yes | #N/A     | #N/A   |
| dpr16               | single   | #N/A     | -   | single   | single |
| cno                 | multiple | dense    | yes | dense    | #N/A   |
| Prosbeta2R2         | single   | dense    | yes | dense    | #N/A   |
| CG1116              | single   | dense    | yes | #N/A     | #N/A   |
| Hph                 | single   | multiple | yes | single   | #N/A   |
| CR31541             | #N/A     | single   | -   | #N/A     | #N/A   |
| I(3)82Fd            | #N/A     | dense    | -   | dense    | #N/A   |
| CG16708             | single   | single   | no  | dense    | #N/A   |
| CG31542             | single   | single   | no  | dense    | #N/A   |
| CG34277             | single   | single   | no  | dense    | #N/A   |
| CG14669             | single   | #N/A     | -   | #N/A     | #N/A   |
| PEK                 | single   | single   | no  | single   | #N/A   |
| Rpl35A              | single   | single   | no  | #N/A     | #N/A   |
| Nmdar1              | single   | #N/A     | -   | #N/A     | #N/A   |
| Itp-r83A            | multiple | #N/A     | -   | #N/A     | #N/A   |
| CG2519              | single   | #N/A     | -   | #N/A     | #N/A   |
| exba                | #N/A     | single   | -   | single   | #N/A   |
| snoRNA:Psi28S-3571  | #N/A     | single   | -   | #N/A     | #N/A   |
| snoRNA:Psi28S-3186  | #N/A     | single   | -   | #N/A     | #N/A   |
| snoRNA:Psi28S-2442b | #N/A     | single   | -   | #N/A     | #N/A   |
| snoRNA:Psi28S-2442a | #N/A     | single   | -   | #N/A     | #N/A   |
| CG1427              | #N/A     | single   | -   | single   | #N/A   |
| asl                 | #N/A     | single   | -   | #N/A     | #N/A   |
| Spec2               | single   | multiple | yes | #N/A     | #N/A   |
| CG2911              | single   | multiple | yes | #N/A     | #N/A   |
| Rpl13A              | single   | multiple | yes | #N/A     | #N/A   |
| snoRNA:Me28S-U2134b | single   | multiple | yes | #N/A     | #N/A   |
| snoRNA:Me28S-U2134a | single   | multiple | yes | #N/A     | #N/A   |
| CG14673             | single   | multiple | yes | #N/A     | #N/A   |
| CG31551             | single   | multiple | yes | #N/A     | #N/A   |
| Xe7                 | single   | single   | yes | #N/A     | #N/A   |
| CG1347              | single   | single   | yes | single   | #N/A   |
| cas                 | #N/A     | multiple | -   | #N/A     | #N/A   |
| CG2082              | single   | #N/A     | -   | #N/A     | #N/A   |
| jagn                | single   | #N/A     | -   | #N/A     | #N/A   |
| kat-60L1            | single   | #N/A     | -   | #N/A     | #N/A   |
| Rm62                | single   | single   | no  | single   | #N/A   |

|                  |          |          |     |          |        |
|------------------|----------|----------|-----|----------|--------|
| CG10280          | single   | single   | no  | #N/A     | single |
| Hr83             | single   | single   | no  | #N/A     | #N/A   |
| Pak              | single   | single   | no  | #N/A     | #N/A   |
| CG33097          | single   | #N/A     | -   | #N/A     | #N/A   |
| CG10286          | single   | #N/A     | -   | #N/A     | #N/A   |
| CG1041           | single   | #N/A     | -   | #N/A     | #N/A   |
| CG1021           | #N/A     | dense    | -   | dense    | single |
| gpp              | multiple | dense    | yes | dense    | dense  |
| CG10267          | #N/A     | single   | -   | single   | #N/A   |
| CG15185          | single   | #N/A     | -   | #N/A     | #N/A   |
| dpr11            | single   | single   | yes | #N/A     | #N/A   |
| CG2336           | #N/A     | single   | -   | #N/A     | #N/A   |
| lab              | single   | single   | no  | single   | #N/A   |
| pb               | multiple | multiple | no  | multiple | #N/A   |
| zen2             | single   | #N/A     | -   | #N/A     | #N/A   |
| CG34297          | single   | #N/A     | -   | #N/A     | #N/A   |
| zen              | multiple | single   | yes | single   | #N/A   |
| bcd              | multiple | dense    | yes | #N/A     | dense  |
| Ama              | single   | dense    | yes | dense    | dense  |
| Dfd              | multiple | single   | yes | multiple | #N/A   |
| mir-10S          | single   | #N/A     | -   | #N/A     | #N/A   |
| mir-10           | single   | #N/A     | -   | #N/A     | #N/A   |
| CG42651          | single   | single   | yes | dense    | #N/A   |
| tRNA:CR31485:Psi | multiple | multiple | yes | #N/A     | #N/A   |
| tRNA:K5:84ABd    | multiple | single   | yes | #N/A     | #N/A   |
| CR42652          | multiple | single   | yes | #N/A     | #N/A   |
| tRNA:K5:84ABc    | multiple | single   | yes | #N/A     | #N/A   |
| tRNA:K5:84ABb    | multiple | single   | yes | #N/A     | #N/A   |
| 7SLRNA           | multiple | single   | yes | #N/A     | #N/A   |
| tRNA:K5:84ABa    | multiple | single   | yes | #N/A     | #N/A   |
| Scr              | multiple | multiple | yes | single   | #N/A   |
| ftz              | dense    | single   | yes | #N/A     | #N/A   |
| Antp             | multiple | dense    | yes | dense    | #N/A   |
| Sodh-1           | dense    | multiple | yes | #N/A     | #N/A   |
| CG1988           | #N/A     | single   | -   | single   | #N/A   |
| CG1105           | #N/A     | single   | -   | #N/A     | #N/A   |
| CG1965           | #N/A     | single   | -   | #N/A     | #N/A   |
| CG1091           | dense    | #N/A     | -   | dense    | single |
| alphaTub84B      | dense    | single   | yes | dense    | single |
| Alh              | dense    | dense    | no  | dense    | dense  |
| Mlp84B           | single   | dense    | yes | #N/A     | dense  |
| sas              | #N/A     | single   | -   | single   | #N/A   |
| CG10055          | #N/A     | single   | -   | #N/A     | #N/A   |
| lap              | #N/A     | single   | -   | #N/A     | #N/A   |
| rn               | single   | #N/A     | -   | #N/A     | #N/A   |
| RacGAP84C        | single   | #N/A     | -   | #N/A     | #N/A   |
| CG31544          | single   | #N/A     | -   | #N/A     | #N/A   |
| CG34023          | single   | #N/A     | -   | #N/A     | #N/A   |
| wa-cup           | single   | #N/A     | -   | #N/A     | #N/A   |
| tRNA:V3b:84Dc    | single   | single   | no  | #N/A     | #N/A   |
| CG1142           | single   | single   | no  | dense    | #N/A   |
| snoRNA:MeU5-C46  | single   | single   | no  | dense    | #N/A   |
| snmRNA:331       | single   | single   | no  | #N/A     | #N/A   |

|               |          |          |     |          |        |
|---------------|----------|----------|-----|----------|--------|
| tRNA:V3b:84Dd | single   | single   | no  | #N/A     | #N/A   |
| alpha-Est9    | multiple | #N/A     | -   | #N/A     | #N/A   |
| CG1287        | multiple | #N/A     | -   | #N/A     | #N/A   |
| alpha-Est2    | single   | #N/A     | -   | #N/A     | #N/A   |
| alpha-Est1    | single   | #N/A     | -   | #N/A     | #N/A   |
| CG18746       | single   | #N/A     | -   | #N/A     | #N/A   |
| CG10086       | single   | #N/A     | -   | #N/A     | #N/A   |
| CG2641        | single   | #N/A     | -   | #N/A     | #N/A   |
| CG17816       | single   | #N/A     | -   | single   | #N/A   |
| CG10445       | single   | #N/A     | -   | #N/A     | #N/A   |
| lds           | multiple | single   | yes | #N/A     | #N/A   |
| dsx           | single   | multiple | yes | multiple | single |
| CD98hc        | single   | single   | no  | single   | single |
| Os-C          | single   | single   | no  | #N/A     | single |
| Sfp84E        | single   | single   | no  | #N/A     | single |
| CG2747        | #N/A     | single   | -   | single   | #N/A   |
| ImpE3         | #N/A     | single   | -   | single   | #N/A   |
| CG10903       | #N/A     | single   | -   | single   | #N/A   |
| CG11035       | #N/A     | single   | -   | single   | #N/A   |
| Tom34         | #N/A     | single   | -   | single   | #N/A   |
| CG7878        | #N/A     | single   | -   | #N/A     | #N/A   |
| CG9667        | #N/A     | single   | -   | #N/A     | #N/A   |
| Gie           | #N/A     | single   | -   | #N/A     | #N/A   |
| grn           | multiple | multiple | yes | multiple | #N/A   |
| CG7800        | #N/A     | dense    | -   | #N/A     | #N/A   |
| CG9630        | #N/A     | dense    | -   | #N/A     | #N/A   |
| ato           | dense    | dense    | yes | #N/A     | #N/A   |
| CG11671       | multiple | dense    | yes | dense    | #N/A   |
| CG11672       | multiple | dense    | yes | dense    | #N/A   |
| CG31464       | single   | dense    | yes | #N/A     | #N/A   |
| CG31463       | #N/A     | dense    | -   | #N/A     | #N/A   |
| CG9626        | single   | #N/A     | -   | #N/A     | #N/A   |
| mRpL1         | single   | #N/A     | -   | #N/A     | #N/A   |
| Gfr           | multiple | #N/A     | -   | #N/A     | #N/A   |
| Sgt1          | multiple | #N/A     | -   | #N/A     | #N/A   |
| tex           | single   | #N/A     | -   | #N/A     | #N/A   |
| CG11693       | single   | #N/A     | -   | #N/A     | #N/A   |
| Poxm          | multiple | dense    | yes | dense    | #N/A   |
| CG7443        | #N/A     | single   | -   | #N/A     | #N/A   |
| DppIII        | single   | #N/A     | -   | #N/A     | #N/A   |
| CG7352        | single   | #N/A     | -   | #N/A     | #N/A   |
| Atg13         | single   | #N/A     | -   | #N/A     | #N/A   |
| PQBP-1        | single   | single   | no  | multiple | #N/A   |
| tRNA:Y1:85Aa  | single   | #N/A     | -   | #N/A     | #N/A   |
| CG8043        | #N/A     | dense    | -   | #N/A     | dense  |
| CG11755       | #N/A     | dense    | -   | #N/A     | dense  |
| CG3325        | dense    | dense    | yes | dense    | dense  |
| hb            | dense    | dense    | yes | single   | #N/A   |
| CG8112        | dense    | multiple | yes | #N/A     | #N/A   |
| Cks85A        | #N/A     | single   | -   | #N/A     | #N/A   |
| CG8116        | #N/A     | single   | -   | #N/A     | #N/A   |
| CG11760       | #N/A     | single   | -   | #N/A     | #N/A   |
| CG9801        | single   | single   | no  | single   | #N/A   |

|                     |          |          |     |          |          |
|---------------------|----------|----------|-----|----------|----------|
| CG8223              | single   | single   | no  | single   | #N/A     |
| CG34135             | single   | single   | no  | #N/A     | #N/A     |
| Pif1A               | single   | #N/A     | -   | single   | #N/A     |
| Pif1B               | single   | #N/A     | -   | single   | #N/A     |
| Tcp-1eta            | dense    | dense    | no  | dense    | single   |
| CG9839              | dense    | dense    | no  | dense    | single   |
| CG8359              | dense    | dense    | no  | dense    | single   |
| CG9837              | dense    | dense    | no  | dense    | single   |
| CG9821              | #N/A     | single   | -   | #N/A     | #N/A     |
| CG8369              | #N/A     | single   | -   | #N/A     | #N/A     |
| CG9836              | #N/A     | single   | -   | #N/A     | #N/A     |
| CG8379              | dense    | #N/A     | -   | #N/A     | #N/A     |
| pyd                 | dense    | dense    | yes | dense    | dense    |
| osk                 | dense    | #N/A     | -   | #N/A     | #N/A     |
| CG11966             | multiple | multiple | no  | multiple | #N/A     |
| CG11967             | single   | #N/A     | -   | single   | #N/A     |
| CG11970             | single   | #N/A     | -   | #N/A     | #N/A     |
| E(var)3-9           | single   | #N/A     | -   | #N/A     | #N/A     |
| CG11975             | single   | #N/A     | -   | #N/A     | #N/A     |
| CG31100             | single   | #N/A     | -   | #N/A     | #N/A     |
| neur                | dense    | dense    | no  | dense    | multiple |
| hyx                 | single   | dense    | yes | single   | single   |
| Nmdmc               | #N/A     | single   | -   | #N/A     | single   |
| Rel                 | #N/A     | single   | -   | #N/A     | single   |
| Mst85C              | #N/A     | multiple | -   | #N/A     | single   |
| CG11033             | #N/A     | multiple | -   | #N/A     | dense    |
| pum                 | multiple | multiple | yes | multiple | dense    |
| D1                  | #N/A     | single   | -   | #N/A     | #N/A     |
| CG16734             | #N/A     | single   | -   | #N/A     | #N/A     |
| CG16736             | #N/A     | single   | -   | #N/A     | #N/A     |
| CG9740              | #N/A     | single   | -   | #N/A     | #N/A     |
| CG8436              | #N/A     | single   | -   | #N/A     | #N/A     |
| CG8444              | #N/A     | single   | -   | #N/A     | #N/A     |
| CG8121              | #N/A     | single   | -   | #N/A     | #N/A     |
| CG33936             | #N/A     | multiple | -   | dense    | dense    |
| snoRNA:Me18S-G1358a | #N/A     | single   | -   | #N/A     | single   |
| CG8129              | #N/A     | single   | -   | #N/A     | #N/A     |
| Fps85D              | single   | dense    | yes | multiple | single   |
| Or85f               | single   | dense    | yes | #N/A     | #N/A     |
| CG34117             | single   | #N/A     | -   | #N/A     | #N/A     |
| RpL34b              | single   | #N/A     | -   | #N/A     | #N/A     |
| CG8132              | single   | #N/A     | -   | #N/A     | #N/A     |
| alpha-Man-II        | #N/A     | single   | -   | #N/A     | #N/A     |
| ps                  | #N/A     | multiple | -   | multiple | #N/A     |
| CG16779             | single   | #N/A     | -   | #N/A     | #N/A     |
| CG8147              | #N/A     | single   | -   | #N/A     | #N/A     |
| RhoL                | #N/A     | dense    | -   | multiple | dense    |
| CG8149              | #N/A     | dense    | -   | #N/A     | dense    |
| rump                | #N/A     | dense    | -   | #N/A     | dense    |
| mura                | single   | single   | no  | single   | dense    |
| CR42549             | single   | single   | no  | single   | #N/A     |
| RnpS1               | single   | single   | no  | single   | #N/A     |
| CG9386              | single   | single   | no  | #N/A     | #N/A     |

|                    |          |          |     |          |        |
|--------------------|----------|----------|-----|----------|--------|
| CG9396             | single   | single   | no  | #N/A     | #N/A   |
| CG9399             | single   | single   | no  | single   | #N/A   |
| Kap-alpha3         | single   | single   | no  | single   | #N/A   |
| P58IPK             | single   | single   | no  | #N/A     | #N/A   |
| bocksbeutel        | dense    | dense    | no  | single   | #N/A   |
| CG8312             | dense    | dense    | no  | multiple | #N/A   |
| CG8319             | #N/A     | single   | -   | dense    | #N/A   |
| Crc                | #N/A     | single   | -   | dense    | #N/A   |
| SpdS               | #N/A     | single   | -   | dense    | #N/A   |
| Scm                | #N/A     | single   | -   | #N/A     | #N/A   |
| CG31352            | single   | single   | no  | dense    | #N/A   |
| trbd               | single   | single   | no  | dense    | #N/A   |
| CG16899            | single   | #N/A     | -   | #N/A     | #N/A   |
| alphaTub85E        | single   | #N/A     | -   | #N/A     | #N/A   |
| CG34409            | single   | single   | no  | #N/A     | #N/A   |
| CG31415            | single   | single   | no  | #N/A     | #N/A   |
| CG12948            | single   | single   | no  | #N/A     | #N/A   |
| PpD3               | single   | single   | no  | #N/A     | #N/A   |
| topi               | single   | single   | no  | single   | #N/A   |
| RpS29              | single   | single   | no  | single   | #N/A   |
| snoRNA:Psi18S-1275 | single   | single   | no  | single   | #N/A   |
| CG12947            | single   | single   | no  | #N/A     | #N/A   |
| CG9461             | #N/A     | single   | -   | #N/A     | #N/A   |
| Teh1               | #N/A     | dense    | -   | #N/A     | #N/A   |
| CG34360            | dense    | dense    | yes | dense    | dense  |
| CG11722            | single   | single   | no  | #N/A     | #N/A   |
| mtTFB2             | single   | single   | no  | #N/A     | #N/A   |
| CG12811            | single   | single   | no  | #N/A     | #N/A   |
| CG3925             | single   | single   | no  | #N/A     | #N/A   |
| FancI              | single   | single   | no  | #N/A     | #N/A   |
| CR33629            | single   | #N/A     | -   | #N/A     | #N/A   |
| CG33783            | single   | #N/A     | -   | #N/A     | #N/A   |
| CG33784            | single   | #N/A     | -   | #N/A     | #N/A   |
| nerfin-2           | single   | #N/A     | -   | #N/A     | #N/A   |
| CG5361             | multiple | #N/A     | -   | #N/A     | #N/A   |
| mir-317            | multiple | #N/A     | -   | #N/A     | #N/A   |
| Fmr1               | single   | #N/A     | -   | #N/A     | #N/A   |
| CG3940             | single   | #N/A     | -   | #N/A     | #N/A   |
| Best1              | multiple | single   | yes | single   | #N/A   |
| CG12814            | multiple | single   | yes | single   | #N/A   |
| Syn                | single   | #N/A     | -   | #N/A     | #N/A   |
| Sirt6              | #N/A     | single   | -   | #N/A     | dense  |
| pont               | #N/A     | single   | -   | single   | dense  |
| CG11870            | single   | single   | yes | single   | dense  |
| CG11872            | single   | #N/A     | -   | #N/A     | #N/A   |
| CG31406            | dense    | dense    | yes | dense    | #N/A   |
| jumu               | dense    | dense    | yes | dense    | single |
| Rfx                | multiple | single   | yes | single   | single |
| cwo                | single   | #N/A     | -   | #N/A     | #N/A   |
| hth                | dense    | dense    | yes | dense    | single |
| CG34304            | #N/A     | multiple | -   | dense    | #N/A   |
| CG6465             | single   | single   | yes | #N/A     | #N/A   |
| CG14688            | single   | #N/A     | -   | #N/A     | #N/A   |

|                    |          |          |     |          |        |
|--------------------|----------|----------|-----|----------|--------|
| Cad86C             | single   | #N/A     | -   | single   | #N/A   |
| CG42394            | single   | #N/A     | -   | #N/A     | #N/A   |
| CG6567             | single   | #N/A     | -   | #N/A     | #N/A   |
| CG4565             | single   | #N/A     | -   | #N/A     | #N/A   |
| CG4570             | single   | #N/A     | -   | #N/A     | #N/A   |
| CG14694            | single   | #N/A     | -   | #N/A     | #N/A   |
| CG6574             | single   | #N/A     | -   | #N/A     | #N/A   |
| CG14695            | #N/A     | single   | -   | #N/A     | #N/A   |
| CG6608             | #N/A     | single   | -   | #N/A     | #N/A   |
| CG14696            | #N/A     | single   | -   | #N/A     | #N/A   |
| CG18577            | single   | #N/A     | -   | #N/A     | #N/A   |
| nocturnin          | single   | #N/A     | -   | #N/A     | #N/A   |
| CG6689             | single   | single   | no  | #N/A     | #N/A   |
| CG6693             | single   | single   | no  | #N/A     | #N/A   |
| Rpl3               | single   | single   | no  | #N/A     | #N/A   |
| snoRNA:Me18S-C1096 | single   | single   | no  | #N/A     | #N/A   |
| snoRNA:Me18S-A425  | single   | single   | no  | #N/A     | #N/A   |
| snoRNA:Psi28S-291  | single   | single   | no  | #N/A     | #N/A   |
| snoRNA:Me28S-G2017 | single   | single   | no  | #N/A     | #N/A   |
| scpr-C             | #N/A     | single   | -   | #N/A     | #N/A   |
| KP78a              | dense    | dense    | no  | dense    | #N/A   |
| KP78b              | dense    | dense    | no  | dense    | #N/A   |
| pros               | multiple | multiple | yes | dense    | #N/A   |
| CG17230            | single   | single   | no  | #N/A     | dense  |
| CG6782             | #N/A     | single   | -   | dense    | #N/A   |
| CG6783             | #N/A     | single   | -   | dense    | #N/A   |
| CG14709            | #N/A     | single   | -   | dense    | #N/A   |
| Jupiter            | single   | dense    | yes | multiple | #N/A   |
| CG14710            | single   | dense    | yes | single   | #N/A   |
| CG6808             | single   | dense    | yes | #N/A     | #N/A   |
| CG10535            | #N/A     | single   | -   | dense    | #N/A   |
| CG42327            | #N/A     | single   | -   | dense    | dense  |
| CG6908             | single   | #N/A     | -   | #N/A     | #N/A   |
| CG18765            | single   | #N/A     | -   | #N/A     | #N/A   |
| Fer3               | single   | #N/A     | -   | #N/A     | #N/A   |
| Lk6                | single   | multiple | yes | dense    | #N/A   |
| l(3)neo38          | dense    | dense    | yes | dense    | single |
| CG17360            | dense    | dense    | yes | single   | single |
| HisCl1             | #N/A     | single   | -   | single   | #N/A   |
| Sbf                | #N/A     | single   | -   | #N/A     | #N/A   |
| glo                | single   | #N/A     | -   | #N/A     | #N/A   |
| CoVa               | single   | #N/A     | -   | #N/A     | #N/A   |
| CG6950             | multiple | #N/A     | -   | #N/A     | #N/A   |
| CG6959             | multiple | single   | yes | #N/A     | #N/A   |
| sad                | single   | single   | no  | #N/A     | #N/A   |
| CG6962             | single   | single   | no  | #N/A     | #N/A   |
| CG31368            | single   | single   | no  | dense    | #N/A   |
| mthl5              | single   | single   | no  | dense    | #N/A   |
| CG31211            | single   | single   | no  | #N/A     | single |
| Hsp70Aa            | single   | #N/A     | -   | #N/A     | dense  |
| Hsp70Ab            | multiple | #N/A     | -   | #N/A     | dense  |
| CG3281             | multiple | #N/A     | -   | single   | dense  |
| aur                | single   | #N/A     | -   | single   | dense  |

|              |          |          |     |        |        |
|--------------|----------|----------|-----|--------|--------|
| CG12213      | single   | #N/A     | -   | single | dense  |
| Tk           | single   | #N/A     | -   | #N/A   | single |
| Ect3         | single   | #N/A     | -   | #N/A   | single |
| CG4702       | multiple | #N/A     | -   | single | #N/A   |
| tRNA:K5:87BC | single   | #N/A     | -   | #N/A   | #N/A   |
| CG3942       | dense    | dense    | yes | dense  | dense  |
| svp          | single   | multiple | yes | dense  | #N/A   |
| CG4066       | #N/A     | single   | -   | #N/A   | #N/A   |
| GstD7        | multiple | #N/A     | -   | #N/A   | #N/A   |
| GstD8        | multiple | #N/A     | -   | #N/A   | #N/A   |
| CG10035      | multiple | #N/A     | -   | #N/A   | #N/A   |
| CG17639      | multiple | #N/A     | -   | #N/A   | #N/A   |
| Cyp9f2       | single   | single   | no  | dense  | #N/A   |
| CG5167       | single   | single   | no  | #N/A   | #N/A   |
| CG5196       | single   | single   | no  | #N/A   | #N/A   |
| Hsp70Bc      | #N/A     | single   | -   | #N/A   | #N/A   |
| Octbeta3R    | single   | single   | yes | #N/A   | #N/A   |
| Vha55        | multiple | single   | yes | single | #N/A   |
| CG6359       | single   | single   | no  | single | #N/A   |
| CG18616      | single   | single   | no  | #N/A   | #N/A   |
| CG11608      | #N/A     | single   | -   | #N/A   | #N/A   |
| CG6753       | #N/A     | dense    | -   | #N/A   | #N/A   |
| CG6234       | multiple | dense    | yes | dense  | single |
| Men          | single   | #N/A     | -   | #N/A   | #N/A   |
| CG10126      | single   | #N/A     | -   | #N/A   | #N/A   |
| CG7091       | single   | single   | no  | #N/A   | #N/A   |
| Paip2        | single   | single   | no  | #N/A   | #N/A   |
| CG8031       | multiple | multiple | yes | #N/A   | #N/A   |
| CG11656      | single   | single   | no  | #N/A   | #N/A   |
| CtBP         | multiple | multiple | yes | single | #N/A   |
| pic          | #N/A     | dense    | -   | #N/A   | #N/A   |
| sim          | dense    | dense    | yes | dense  | single |
| Su(var)3-7   | single   | #N/A     | -   | #N/A   | #N/A   |
| CG8449       | single   | #N/A     | -   | #N/A   | #N/A   |
| CG8630       | single   | #N/A     | -   | #N/A   | #N/A   |
| CG15888      | single   | #N/A     | -   | #N/A   | #N/A   |
| CG15887      | single   | #N/A     | -   | #N/A   | #N/A   |
| Osi22        | dense    | #N/A     | -   | single | #N/A   |
| wntD         | dense    | #N/A     | -   | #N/A   | #N/A   |
| CG8773       | dense    | #N/A     | -   | single | #N/A   |
| poly         | single   | #N/A     | -   | #N/A   | #N/A   |
| CG8790       | single   | #N/A     | -   | #N/A   | #N/A   |
| CG9813       | multiple | single   | yes | #N/A   | #N/A   |
| CG8870       | multiple | single   | yes | #N/A   | #N/A   |
| mRpS21       | single   | single   | no  | #N/A   | #N/A   |
| Droj2        | single   | single   | no  | #N/A   | #N/A   |
| CG9799       | single   | single   | no  | #N/A   | #N/A   |
| CG14377      | #N/A     | single   | -   | #N/A   | #N/A   |
| CG9796       | dense    | single   | yes | #N/A   | #N/A   |
| CG33977      | dense    | multiple | yes | #N/A   | #N/A   |
| yellow-e3    | dense    | multiple | yes | single | #N/A   |
| yellow-e2    | dense    | single   | yes | single | #N/A   |
| Ir87a        | single   | #N/A     | -   | #N/A   | #N/A   |

|              |          |          |     |          |        |
|--------------|----------|----------|-----|----------|--------|
| Act87E       | single   | single   | yes | #N/A     | #N/A   |
| yrt          | multiple | multiple | yes | single   | #N/A   |
| sqd          | single   | single   | no  | single   | single |
| rin          | single   | single   | no  | #N/A     | #N/A   |
| Hrb87F       | single   | single   | no  | #N/A     | #N/A   |
| B52          | multiple | single   | yes | single   | #N/A   |
| Task6        | single   | #N/A     | -   | #N/A     | #N/A   |
| filf         | single   | #N/A     | -   | single   | #N/A   |
| CG14367      | single   | #N/A     | -   | #N/A     | #N/A   |
| f-cup        | single   | #N/A     | -   | #N/A     | #N/A   |
| CG34044      | single   | single   | no  | #N/A     | dense  |
| CG34383      | multiple | multiple | yes | multiple | dense  |
| CG9602       | single   | single   | no  | #N/A     | dense  |
| CG9297       | single   | #N/A     | -   | #N/A     | #N/A   |
| tRNA:CR31331 | single   | single   | no  | #N/A     | #N/A   |
| tal-1A       | dense    | dense    | no  | multiple | single |
| tal-2A       | dense    | dense    | no  | single   | single |
| tal-3A       | dense    | dense    | no  | single   | single |
| tal-AA       | dense    | dense    | no  | single   | single |
| CG14362      | single   | #N/A     | -   | #N/A     | #N/A   |
| E5           | multiple | single   | yes | #N/A     | #N/A   |
| ems          | single   | dense    | yes | multiple | #N/A   |
| Art9         | #N/A     | single   | -   | #N/A     | #N/A   |
| Orc2         | dense    | dense    | yes | dense    | #N/A   |
| rdx          | dense    | dense    | yes | dense    | single |
| Cyp6d5       | dense    | #N/A     | -   | #N/A     | #N/A   |
| foxo         | #N/A     | single   | -   | #N/A     | #N/A   |
| CG12402      | #N/A     | single   | -   | single   | #N/A   |
| Or88a        | #N/A     | single   | -   | #N/A     | #N/A   |
| CG14357      | #N/A     | single   | -   | #N/A     | #N/A   |
| CG14356      | single   | #N/A     | -   | #N/A     | #N/A   |
| trx          | single   | single   | no  | multiple | #N/A   |
| CG8538       | #N/A     | single   | -   | #N/A     | #N/A   |
| CG3321       | #N/A     | single   | -   | #N/A     | #N/A   |
| spn-B        | single   | single   | yes | #N/A     | #N/A   |
| NK7.1        | single   | #N/A     | -   | multiple | #N/A   |
| cv-c         | multiple | dense    | yes | dense    | dense  |
| CG14852      | dense    | #N/A     | -   | #N/A     | #N/A   |
| CG31313      | dense    | #N/A     | -   | #N/A     | #N/A   |
| CG8066       | dense    | #N/A     | -   | single   | #N/A   |
| Cys          | dense    | #N/A     | -   | single   | #N/A   |
| CG7987       | dense    | dense    | no  | #N/A     | #N/A   |
| stumps       | multiple | dense    | yes | dense    | single |
| CG14853      | single   | #N/A     | -   | #N/A     | #N/A   |
| put          | single   | single   | no  | single   | #N/A   |
| His4r        | multiple | multiple | no  | #N/A     | #N/A   |
| CG7886       | multiple | multiple | no  | single   | #N/A   |
| l(3)L1231    | single   | single   | no  | #N/A     | single |
| CG3505       | single   | single   | no  | #N/A     | single |
| CG3509       | multiple | #N/A     | -   | #N/A     | #N/A   |
| Neu3         | multiple | multiple | yes | multiple | single |
| CG33967      | multiple | multiple | yes | multiple | #N/A   |
| CG7530       | #N/A     | single   | -   | multiple | single |



|            |          |          |     |          |        |
|------------|----------|----------|-----|----------|--------|
| eff        | single   | multiple | yes | multiple | single |
| CG3563     | multiple | multiple | yes | multiple | single |
| CG33330    | single   | #N/A     | -   | #N/A     | #N/A   |
| CG14857    | single   | #N/A     | -   | #N/A     | #N/A   |
| btsz       | single   | single   | no  | single   | #N/A   |
| CG3837     | single   | #N/A     | -   | #N/A     | #N/A   |
| CG6966     | single   | single   | no  | single   | #N/A   |
| CG31304    | single   | single   | no  | #N/A     | #N/A   |
| CG6934     | multiple | multiple | yes | single   | #N/A   |
| CG6904     | #N/A     | single   | -   | single   | #N/A   |
| Caf1       | #N/A     | single   | -   | #N/A     | #N/A   |
| Art3       | #N/A     | single   | -   | #N/A     | #N/A   |
| CG34316    | #N/A     | single   | -   | #N/A     | single |
| mRpS10     | #N/A     | single   | -   | #N/A     | #N/A   |
| tefu       | dense    | multiple | yes | #N/A     | single |
| Hsc70-4    | dense    | single   | yes | #N/A     | #N/A   |
| CG6499     | dense    | #N/A     | -   | #N/A     | #N/A   |
| Su(var)3-9 | single   | single   | yes | #N/A     | #N/A   |
| Set        | single   | single   | yes | #N/A     | #N/A   |
| Oscp       | single   | single   | yes | #N/A     | #N/A   |
| CG14864    | single   | #N/A     | -   | #N/A     | #N/A   |
| CG4334     | single   | #N/A     | -   | #N/A     | #N/A   |
| Tm1        | multiple | single   | yes | #N/A     | #N/A   |
| CG6218     | #N/A     | single   | -   | #N/A     | #N/A   |
| Aats-ser   | #N/A     | single   | -   | #N/A     | #N/A   |
| Surf4      | #N/A     | single   | -   | #N/A     | #N/A   |
| CG5038     | single   | #N/A     | -   | #N/A     | #N/A   |
| CG6194     | single   | single   | no  | single   | #N/A   |
| CG5044     | single   | single   | no  | single   | #N/A   |
| ldlCp      | single   | single   | no  | #N/A     | #N/A   |
| Atx2       | multiple | dense    | yes | dense    | dense  |
| mir-13b-1  | multiple | dense    | yes | #N/A     | #N/A   |
| mir-13a    | multiple | dense    | yes | #N/A     | #N/A   |
| mir-13aS   | multiple | dense    | yes | #N/A     | #N/A   |
| mir-2c     | multiple | dense    | yes | #N/A     | #N/A   |
| CG6118     | multiple | dense    | yes | dense    | dense  |
| CG14872    | single   | #N/A     | -   | single   | dense  |
| CG18516    | #N/A     | single   | -   | #N/A     | #N/A   |
| CG5302     | #N/A     | dense    | -   | dense    | #N/A   |
| pxb        | dense    | dense    | yes | dense    | dense  |
| c(3)G      | single   | #N/A     | -   | #N/A     | dense  |
| Acyp2      | single   | #N/A     | -   | #N/A     | #N/A   |
| CG4699     | single   | #N/A     | -   | #N/A     | #N/A   |
| CG31292    | single   | #N/A     | -   | #N/A     | #N/A   |
| CG3303     | single   | #N/A     | -   | #N/A     | #N/A   |
| Sap47      | single   | #N/A     | -   | #N/A     | dense  |
| CG4287     | single   | #N/A     | -   | #N/A     | dense  |
| CG5516     | single   | #N/A     | -   | #N/A     | dense  |
| CG32856    | single   | #N/A     | -   | #N/A     | dense  |
| mor        | single   | single   | no  | single   | dense  |
| Hel89B     | single   | single   | no  | single   | #N/A   |
| srp        | multiple | dense    | yes | #N/A     | single |
| GATAe      | single   | single   | no  | single   | #N/A   |

|              |          |          |     |          |        |
|--------------|----------|----------|-----|----------|--------|
| CG17631      | single   | single   | no  | #N/A     | #N/A   |
| pnr          | multiple | multiple | yes | multiple | #N/A   |
| Mhcl         | single   | single   | no  | single   | #N/A   |
| Sb           | single   | single   | no  | #N/A     | dense  |
| CG5903       | single   | single   | no  | #N/A     | dense  |
| CG5916       | single   | single   | no  | #N/A     | dense  |
| Fer2         | single   | single   | no  | #N/A     | dense  |
| tara         | dense    | dense    | no  | dense    | dense  |
| Mat89Ba      | single   | dense    | yes | #N/A     | dense  |
| gish         | multiple | dense    | yes | dense    | dense  |
| Zip3         | single   | single   | no  | #N/A     | #N/A   |
| SF2          | dense    | single   | yes | #N/A     | #N/A   |
| ss           | #N/A     | multiple | -   | single   | #N/A   |
| Pak3         | dense    | multiple | yes | dense    | #N/A   |
| CG10405      | single   | single   | no  | #N/A     | #N/A   |
| CG14883      | single   | single   | no  | #N/A     | #N/A   |
| CG42342      | single   | multiple | yes | dense    | single |
| CG14891      | single   | #N/A     | -   | #N/A     | #N/A   |
| CG14903      | single   | #N/A     | -   | #N/A     | #N/A   |
| CG14892      | #N/A     | single   | -   | #N/A     | #N/A   |
| CG10345      | #N/A     | single   | -   | #N/A     | #N/A   |
| CG14893      | #N/A     | single   | -   | #N/A     | single |
| CG14905      | single   | multiple | yes | single   | single |
| Fas1         | single   | multiple | yes | single   | single |
| Ubx          | dense    | multiple | yes | dense    | dense  |
| bxd          | dense    | dense    | yes | #N/A     | single |
| CG31275      | #N/A     | dense    | -   | multiple | single |
| tre-3        | dense    | dense    | yes | #N/A     | #N/A   |
| tre-2        | dense    | dense    | yes | #N/A     | #N/A   |
| tre-1        | dense    | dense    | yes | #N/A     | #N/A   |
| Glut3        | dense    | multiple | yes | #N/A     | #N/A   |
| abd-A        | dense    | dense    | yes | dense    | #N/A   |
| iab-4        | multiple | dense    | yes | #N/A     | #N/A   |
| mir-iab-4-5p | multiple | dense    | yes | #N/A     | #N/A   |
| mir-iab-4-3p | multiple | dense    | yes | #N/A     | #N/A   |
| CG10349      | multiple | dense    | yes | #N/A     | #N/A   |
| Abd-B        | multiple | dense    | yes | single   | #N/A   |
| CG31274      | #N/A     | single   | -   | #N/A     | #N/A   |
| CG17556      | #N/A     | single   | -   | #N/A     | #N/A   |
| CG3534       | #N/A     | multiple | -   | single   | #N/A   |
| CG16941      | #N/A     | multiple | -   | #N/A     | #N/A   |
| Irc          | #N/A     | single   | -   | #N/A     | #N/A   |
| Pxd          | #N/A     | single   | -   | #N/A     | #N/A   |
| CG3590       | #N/A     | single   | -   | #N/A     | #N/A   |
| CG18213      | single   | single   | yes | #N/A     | #N/A   |
| CG5220       | single   | single   | yes | #N/A     | #N/A   |
| CG3995       | single   | single   | yes | single   | #N/A   |
| Patr-1       | single   | single   | yes | single   | #N/A   |
| Dad          | #N/A     | multiple | -   | #N/A     | single |
| Keap1        | dense    | single   | yes | #N/A     | #N/A   |
| kuk          | dense    | single   | yes | #N/A     | #N/A   |
| GckIII       | dense    | #N/A     | -   | #N/A     | #N/A   |
| beat-Ila     | multiple | #N/A     | -   | multiple | #N/A   |

|               |          |          |     |        |        |
|---------------|----------|----------|-----|--------|--------|
| Brf           | single   | #N/A     | -   | #N/A   | #N/A   |
| sds22         | single   | #N/A     | -   | #N/A   | #N/A   |
| CREG          | multiple | #N/A     | -   | #N/A   | #N/A   |
| Sur-8         | multiple | #N/A     | -   | #N/A   | #N/A   |
| CG14332       | single   | #N/A     | -   | #N/A   | #N/A   |
| CG5873        | single   | #N/A     | -   | single | #N/A   |
| Dscam3        | single   | single   | no  | #N/A   | #N/A   |
| Hmx           | #N/A     | single   | -   | #N/A   | #N/A   |
| CG7587        | #N/A     | multiple | -   | #N/A   | #N/A   |
| sll           | #N/A     | single   | -   | #N/A   | #N/A   |
| CG34281       | multiple | #N/A     | -   | #N/A   | #N/A   |
| CG14327       | multiple | #N/A     | -   | #N/A   | #N/A   |
| tRNA:V3b:90BC | multiple | #N/A     | -   | #N/A   | #N/A   |
| tRNA:P:90Ca   | multiple | #N/A     | -   | #N/A   | #N/A   |
| CG14324       | multiple | #N/A     | -   | #N/A   | #N/A   |
| CG14326       | multiple | #N/A     | -   | #N/A   | #N/A   |
| tRNA:CR31570  | multiple | #N/A     | -   | #N/A   | #N/A   |
| tRNA:P:90Cb   | multiple | #N/A     | -   | #N/A   | #N/A   |
| tRNA:A:90C    | multiple | #N/A     | -   | #N/A   | #N/A   |
| CG14325       | single   | #N/A     | -   | #N/A   | #N/A   |
| tRNA:V4:90C   | single   | #N/A     | -   | #N/A   | #N/A   |
| tRNA:CR31569  | single   | #N/A     | -   | #N/A   | #N/A   |
| tRNA:CR31573  | single   | #N/A     | -   | #N/A   | #N/A   |
| tRNA:CR31568  | single   | #N/A     | -   | #N/A   | #N/A   |
| tRNA:CR31578  | single   | #N/A     | -   | #N/A   | #N/A   |
| tRNA:CR31579  | single   | #N/A     | -   | #N/A   | #N/A   |
| tRNA:CR31580  | single   | #N/A     | -   | #N/A   | #N/A   |
| CG14322       | multiple | single   | no  | single | #N/A   |
| tRNA:CR31577  | single   | single   | yes | #N/A   | #N/A   |
| tRNA:CR31575  | single   | single   | yes | #N/A   | #N/A   |
| alt           | #N/A     | single   | -   | single | #N/A   |
| CG7655        | #N/A     | single   | -   | single | #N/A   |
| CG31251       | #N/A     | single   | -   | single | #N/A   |
| CG31360       | single   | single   | yes | #N/A   | #N/A   |
| CG31249       | single   | #N/A     | -   | #N/A   | #N/A   |
| osa           | multiple | dense    | yes | dense  | #N/A   |
| pxt           | single   | #N/A     | -   | #N/A   | #N/A   |
| Atg8b         | single   | #N/A     | -   | #N/A   | #N/A   |
| Fsh           | single   | #N/A     | -   | #N/A   | #N/A   |
| CG14318       | single   | #N/A     | -   | #N/A   | #N/A   |
| CG7357        | single   | #N/A     | -   | #N/A   | dense  |
| CG18012       | single   | multiple | yes | single | dense  |
| CG31246       | multiple | multiple | no  | dense  | #N/A   |
| tinc          | single   | #N/A     | -   | #N/A   | dense  |
| Rim           | multiple | #N/A     | -   | #N/A   | #N/A   |
| cpo           | #N/A     | multiple | -   | dense  | single |
| CG42457       | #N/A     | multiple | -   | dense  | single |
| htl           | multiple | dense    | yes | dense  | dense  |
| CG14317       | single   | #N/A     | -   | #N/A   | #N/A   |
| repo          | dense    | #N/A     | -   | #N/A   | #N/A   |
| CG7156        | dense    | single   | yes | #N/A   | #N/A   |
| 14-3-3epsilon | dense    | single   | yes | #N/A   | #N/A   |
| l(3)05822     | single   | single   | no  | single | #N/A   |

|                    |          |          |     |          |       |
|--------------------|----------|----------|-----|----------|-------|
| Dlc90F             | single   | single   | no  | single   | #N/A  |
| CG18600            | single   | single   | no  | #N/A     | #N/A  |
| CG31122            | single   | #N/A     | -   | #N/A     | #N/A  |
| CG10864            | single   | #N/A     | -   | #N/A     | #N/A  |
| fru                | single   | #N/A     | -   | #N/A     | dense |
| CG31224            | #N/A     | single   | -   | #N/A     | #N/A  |
| CstF-64            | #N/A     | single   | -   | #N/A     | #N/A  |
| Cpsf73             | #N/A     | single   | -   | #N/A     | #N/A  |
| CG31231            | single   | #N/A     | -   | #N/A     | #N/A  |
| CG31229            | single   | #N/A     | -   | #N/A     | #N/A  |
| CG7702             | single   | #N/A     | -   | #N/A     | #N/A  |
| CG31230            | single   | #N/A     | -   | #N/A     | #N/A  |
| CG14298            | single   | #N/A     | -   | #N/A     | #N/A  |
| Xrp1               | single   | multiple | yes | single   | #N/A  |
| CG14290            | single   | single   | no  | single   | #N/A  |
| CG42613            | single   | #N/A     | -   | single   | #N/A  |
| CG12269            | single   | #N/A     | -   | single   | #N/A  |
| CG5451             | single   | single   | yes | single   | dense |
| dnk                | #N/A     | single   | -   | #N/A     | dense |
| snRNP-U1           | dense    | dense    | yes | dense    | #N/A  |
| gukh               | dense    | dense    | yes | dense    | dense |
| cdi                | single   | dense    | yes | dense    | #N/A  |
| mRpl55             | single   | dense    | yes | dense    | #N/A  |
| ATPsyn-d           | single   | dense    | yes | dense    | #N/A  |
| Ppcs               | #N/A     | single   | -   | #N/A     | #N/A  |
| CG11779            | #N/A     | single   | -   | #N/A     | #N/A  |
| CG5835             | #N/A     | single   | -   | #N/A     | #N/A  |
| CG5555             | single   | #N/A     | -   | #N/A     | #N/A  |
| CG31475            | single   | #N/A     | -   | #N/A     | #N/A  |
| cry                | single   | #N/A     | -   | #N/A     | #N/A  |
| DI                 | dense    | dense    | yes | dense    | dense |
| Ino80              | multiple | dense    | yes | multiple | #N/A  |
| CG3581             | single   | single   | no  | #N/A     | #N/A  |
| CG31404            | #N/A     | single   | -   | #N/A     | #N/A  |
| CG31245            | #N/A     | single   | -   | single   | #N/A  |
| CR34285            | #N/A     | single   | -   | #N/A     | #N/A  |
| CG3734             | #N/A     | single   | -   | #N/A     | #N/A  |
| CG31221            | single   | #N/A     | -   | #N/A     | #N/A  |
| Dys                | multiple | multiple | no  | single   | #N/A  |
| CG6255             | multiple | single   | yes | single   | #N/A  |
| snoRNA:Me18S-A1374 | #N/A     | single   | -   | #N/A     | #N/A  |
| Naam               | single   | #N/A     | -   | #N/A     | #N/A  |
| CG11453            | #N/A     | multiple | -   | #N/A     | #N/A  |
| tRNA:V3b:92Bb      | single   | multiple | yes | #N/A     | #N/A  |
| tRNA:CR31215       | single   | multiple | yes | #N/A     | #N/A  |
| bnl                | multiple | dense    | yes | dense    | #N/A  |
| tRNA:CR31471       | #N/A     | dense    | -   | #N/A     | #N/A  |
| CG31459            | #N/A     | multiple | -   | #N/A     | #N/A  |
| CG4662             | #N/A     | single   | -   | #N/A     | #N/A  |
| ire-1              | single   | single   | no  | #N/A     | #N/A  |
| CG11447            | single   | single   | no  | #N/A     | #N/A  |
| CG4572             | single   | single   | no  | #N/A     | dense |
| CG4686             | single   | single   | no  | #N/A     | dense |

|                   |          |          |     |          |        |
|-------------------|----------|----------|-----|----------|--------|
| CG4459            | dense    | single   | yes | #N/A     | single |
| Hs6st             | dense    | dense    | no  | dense    | dense  |
| mira              | dense    | multiple | yes | multiple | single |
| CG31213           | single   | #N/A     | -   | #N/A     | #N/A   |
| CG31206           | single   | #N/A     | -   | #N/A     | #N/A   |
| CG5023            | single   | #N/A     | -   | #N/A     | #N/A   |
| CG5060            | multiple | dense    | yes | single   | #N/A   |
| cic               | multiple | dense    | yes | #N/A     | #N/A   |
| CG4367            | single   | #N/A     | -   | #N/A     | #N/A   |
| CG4362            | single   | #N/A     | -   | #N/A     | #N/A   |
| CG42668           | #N/A     | single   | -   | single   | #N/A   |
| CG4360            | #N/A     | single   | -   | #N/A     | #N/A   |
| Sirt2             | #N/A     | single   | -   | #N/A     | #N/A   |
| Stat92E           | multiple | multiple | no  | multiple | #N/A   |
| att-ORFA          | multiple | single   | yes | #N/A     | #N/A   |
| att-ORFB          | multiple | single   | yes | #N/A     | #N/A   |
| CG5180            | single   | #N/A     | -   | #N/A     | #N/A   |
| CG15922           | single   | #N/A     | -   | #N/A     | #N/A   |
| CG5191            | single   | single   | yes | #N/A     | #N/A   |
| snoRNA:Psi18S-301 | #N/A     | single   | -   | #N/A     | #N/A   |
| TFAM              | #N/A     | single   | -   | #N/A     | dense  |
| CG5412            | #N/A     | single   | -   | #N/A     | dense  |
| bon               | single   | #N/A     | -   | #N/A     | #N/A   |
| Pi3K92E           | single   | #N/A     | -   | #N/A     | #N/A   |
| Lrrk              | single   | #N/A     | -   | #N/A     | #N/A   |
| CG17273           | #N/A     | single   | -   | single   | #N/A   |
| CG31223           | #N/A     | single   | -   | single   | #N/A   |
| Synd              | #N/A     | single   | -   | #N/A     | #N/A   |
| CG15695           | multiple | #N/A     | -   | #N/A     | #N/A   |
| CG15696           | multiple | #N/A     | -   | #N/A     | #N/A   |
| RpS30             | multiple | #N/A     | -   | #N/A     | #N/A   |
| Atpalpha          | multiple | single   | yes | single   | single |
| RhoGAP93B         | multiple | multiple | no  | dense    | dense  |
| CG7044            | multiple | single   | yes | dense    | dense  |
| SIFR              | multiple | single   | yes | #N/A     | dense  |
| Hsromega          | multiple | single   | yes | #N/A     | dense  |
| CG16791           | single   | #N/A     | -   | single   | #N/A   |
| mod(mdg4)         | multiple | single   | yes | #N/A     | dense  |
| tin               | multiple | multiple | yes | #N/A     | dense  |
| bap               | #N/A     | single   | -   | #N/A     | #N/A   |
| CG6475            | #N/A     | single   | -   | #N/A     | #N/A   |
| CG7907            | #N/A     | single   | -   | single   | #N/A   |
| CheB93b           | dense    | dense    | no  | dense    | #N/A   |
| lbl               | dense    | dense    | yes | dense    | #N/A   |
| lbe               | #N/A     | multiple | -   | multiple | #N/A   |
| C15               | multiple | multiple | yes | multiple | single |
| CG7956            | #N/A     | single   | -   | #N/A     | #N/A   |
| CG15499           | single   | multiple | yes | #N/A     | #N/A   |
| slou              | single   | multiple | yes | #N/A     | #N/A   |
| CG15498           | #N/A     | single   | -   | multiple | dense  |
| InR               | dense    | dense    | yes | dense    | dense  |
| E2f               | dense    | dense    | yes | dense    | dense  |
| mir-11            | multiple | #N/A     | -   | #N/A     | #N/A   |

|                |          |          |     |          |          |
|----------------|----------|----------|-----|----------|----------|
| Caki           | single   | dense    | yes | dense    | #N/A     |
| Gr93a          | multiple | dense    | yes | #N/A     | single   |
| glec           | multiple | dense    | yes | dense    | single   |
| lsn            | #N/A     | single   | -   | #N/A     | #N/A     |
| CG6455         | #N/A     | single   | -   | #N/A     | #N/A     |
| mRpl35         | #N/A     | single   | -   | #N/A     | #N/A     |
| CG6028         | #N/A     | single   | -   | #N/A     | #N/A     |
| Cchl           | #N/A     | single   | -   | #N/A     | #N/A     |
| how            | single   | #N/A     | -   | multiple | multiple |
| CG5778         | single   | single   | yes | multiple | #N/A     |
| CG13407        | single   | #N/A     | -   | #N/A     | #N/A     |
| CG42390        | multiple | multiple | yes | dense    | #N/A     |
| SKIP           | multiple | dense    | yes | dense    | single   |
| CG13858        | single   | #N/A     | -   | #N/A     | #N/A     |
| CG7077         | multiple | multiple | no  | single   | #N/A     |
| sar1           | multiple | multiple | no  | single   | #N/A     |
| PSR            | single   | #N/A     | -   | #N/A     | #N/A     |
| CG34131        | single   | #N/A     | -   | #N/A     | #N/A     |
| CG7071         | single   | #N/A     | -   | #N/A     | #N/A     |
| CG5382         | single   | #N/A     | -   | #N/A     | #N/A     |
| PyK            | single   | single   | no  | #N/A     | #N/A     |
| CG7069         | single   | single   | no  | #N/A     | #N/A     |
| CG18596        | single   | single   | no  | #N/A     | #N/A     |
| Nrx-1          | single   | #N/A     | -   | #N/A     | #N/A     |
| loco           | #N/A     | single   | -   | single   | #N/A     |
| CG42686        | #N/A     | single   | -   | #N/A     | #N/A     |
| CG6954         | single   | single   | no  | dense    | #N/A     |
| wge            | #N/A     | multiple | -   | #N/A     | #N/A     |
| Irp-1A         | single   | multiple | -   | #N/A     | #N/A     |
| CG4813         | single   | single   | no  | #N/A     | #N/A     |
| CG17618        | single   | single   | yes | #N/A     | #N/A     |
| CG6982         | single   | single   | yes | #N/A     | #N/A     |
| CG31139        | single   | #N/A     | -   | #N/A     | #N/A     |
| rumi           | single   | #N/A     | -   | #N/A     | #N/A     |
| CG7023         | single   | #N/A     | -   | #N/A     | #N/A     |
| CG7029         | multiple | single   | yes | single   | #N/A     |
| CG4704         | single   | #N/A     | -   | #N/A     | #N/A     |
| Nha2           | single   | #N/A     | -   | #N/A     | #N/A     |
| Or94b          | single   | #N/A     | -   | #N/A     | #N/A     |
| lmd            | single   | multiple | yes | dense    | #N/A     |
| CG13833        | #N/A     | single   | -   | #N/A     | #N/A     |
| CG31457        | #N/A     | dense    | -   | #N/A     | #N/A     |
| hh             | dense    | dense    | yes | dense    | #N/A     |
| lr             | #N/A     | multiple | -   | #N/A     | #N/A     |
| cnc            | single   | single   | yes | multiple | single   |
| wda            | single   | #N/A     | -   | #N/A     | #N/A     |
| CG13827        | single   | #N/A     | -   | #N/A     | #N/A     |
| orb            | single   | single   | no  | multiple | #N/A     |
| cdc16          | single   | single   | no  | #N/A     | #N/A     |
| CG4434         | dense    | dense    | no  | #N/A     | #N/A     |
| pnt            | dense    | dense    | no  | dense    | dense    |
| DNApol-epsilon | multiple | dense    | yes | dense    | #N/A     |
| CG31414        | #N/A     | dense    | -   | dense    | #N/A     |

|               |          |          |     |          |        |
|---------------|----------|----------|-----|----------|--------|
| CG10301       | #N/A     | dense    | -   | dense    | #N/A   |
| CG10300       | #N/A     | dense    | -   | #N/A     | #N/A   |
| nau           | #N/A     | dense    | -   | #N/A     | #N/A   |
| CG10232       | single   | #N/A     | -   | #N/A     | #N/A   |
| CG10365       | single   | single   | yes | single   | single |
| RNaseMRP:RNA  | #N/A     | single   | -   | #N/A     | #N/A   |
| Rpn9          | #N/A     | single   | -   | #N/A     | single |
| Hmgcr         | #N/A     | single   | -   | #N/A     | single |
| Nup98         | multiple | dense    | yes | single   | #N/A   |
| mbc           | multiple | dense    | yes | multiple | single |
| CG34355       | single   | single   | no  | #N/A     | single |
| snRNA:U1:95Cc | single   | single   | no  | #N/A     | #N/A   |
| snRNA:U1:95Cb | single   | single   | no  | #N/A     | #N/A   |
| snRNA:U1:95Ca | single   | #N/A     | -   | #N/A     | #N/A   |
| Pli           | multiple | multiple | yes | single   | dense  |
| Pros26.4      | single   | single   | no  | #N/A     | dense  |
| CG13599       | single   | single   | no  | #N/A     | dense  |
| RpS19b        | single   | single   | no  | #N/A     | dense  |
| CG5854        | single   | single   | no  | #N/A     | dense  |
| Gdh           | single   | single   | no  | #N/A     | #N/A   |
| KrT95D        | multiple | single   | yes | #N/A     | dense  |
| CG5933        | multiple | single   | yes | #N/A     | dense  |
| Miro          | multiple | multiple | no  | #N/A     | dense  |
| spas          | single   | single   | no  | #N/A     | #N/A   |
| kal-1         | single   | single   | no  | single   | #N/A   |
| CG31133       | single   | single   | no  | #N/A     | #N/A   |
| p38c          | single   | single   | no  | #N/A     | #N/A   |
| twin          | single   | single   | no  | #N/A     | single |
| CG17786       | single   | single   | no  | #N/A     | #N/A   |
| cav           | single   | single   | no  | #N/A     | #N/A   |
| CG5669        | single   | single   | no  | #N/A     | #N/A   |
| CG13609       | single   | single   | no  | #N/A     | #N/A   |
| Acp95EF       | single   | single   | no  | #N/A     | #N/A   |
| Spase22-23    | single   | single   | no  | #N/A     | #N/A   |
| mask          | single   | single   | yes | #N/A     | #N/A   |
| jar           | dense    | dense    | yes | dense    | single |
| tRNA:CR31130  | #N/A     | single   | -   | #N/A     | #N/A   |
| Orct2         | dense    | dense    | yes | dense    | single |
| Orct          | dense    | dense    | yes | #N/A     | #N/A   |
| CG13611       | #N/A     | single   | -   | #N/A     | #N/A   |
| CG6356        | single   | multiple | yes | #N/A     | #N/A   |
| CG34290       | single   | single   | no  | single   | #N/A   |
| CG6364        | single   | single   | no  | single   | #N/A   |
| CG5715        | multiple | multiple | no  | single   | #N/A   |
| crb           | single   | single   | no  | single   | #N/A   |
| CG13618       | single   | #N/A     | -   | #N/A     | #N/A   |
| CG6607        | single   | #N/A     | -   | #N/A     | #N/A   |
| CG13623       | single   | #N/A     | -   | #N/A     | #N/A   |
| ana1          | single   | #N/A     | -   | #N/A     | #N/A   |
| CG13624       | single   | #N/A     | -   | single   | #N/A   |
| CG13625       | #N/A     | multiple | -   | multiple | #N/A   |
| mld           | #N/A     | multiple | -   | multiple | #N/A   |
| atl           | single   | single   | no  | #N/A     | #N/A   |

|                    |          |          |     |          |       |
|--------------------|----------|----------|-----|----------|-------|
| Wsck               | single   | single   | no  | #N/A     | #N/A  |
| ash2               | single   | #N/A     | -   | #N/A     | #N/A  |
| CG31125            | single   | #N/A     | -   | #N/A     | #N/A  |
| CG6695             | single   | #N/A     | -   | #N/A     | #N/A  |
| Rpb10              | single   | #N/A     | -   | #N/A     | #N/A  |
| CG13630            | multiple | single   | yes | #N/A     | #N/A  |
| tok                | multiple | multiple | no  | #N/A     | dense |
| snoRNA:Me18S-C1280 | multiple | single   | yes | #N/A     | #N/A  |
| tld                | single   | single   | no  | single   | dense |
| asp                | single   | #N/A     | -   | single   | dense |
| Ast                | single   | #N/A     | -   | #N/A     | dense |
| Esp                | single   | single   | no  | single   | #N/A  |
| CG7016             | single   | single   | no  | #N/A     | #N/A  |
| CG13641            | single   | single   | no  | #N/A     | #N/A  |
| Ela                | single   | single   | no  | #N/A     | #N/A  |
| CycB3              | single   | multiple | yes | #N/A     | #N/A  |
| CG3744             | #N/A     | single   | -   | #N/A     | #N/A  |
| tnc                | single   | single   | yes | #N/A     | #N/A  |
| beta4GalT7         | single   | #N/A     | -   | #N/A     | #N/A  |
| CG11781            | single   | #N/A     | -   | #N/A     | #N/A  |
| CG6422             | single   | #N/A     | -   | #N/A     | #N/A  |
| CG31115            | single   | #N/A     | -   | #N/A     | #N/A  |
| bai                | single   | #N/A     | -   | #N/A     | #N/A  |
| 5PtaseI            | single   | #N/A     | -   | #N/A     | #N/A  |
| CG11786            | single   | single   | no  | dense    | #N/A  |
| CG11790            | single   | single   | no  | dense    | #N/A  |
| CG11791            | single   | single   | no  | dense    | #N/A  |
| veli               | single   | #N/A     | -   | #N/A     | #N/A  |
| CG11820            | single   | #N/A     | -   | #N/A     | #N/A  |
| OstStt3            | single   | #N/A     | -   | #N/A     | #N/A  |
| CG11839            | single   | #N/A     | -   | #N/A     | #N/A  |
| CG9996             | #N/A     | single   | -   | #N/A     | #N/A  |
| CG11920            | #N/A     | single   | -   | #N/A     | #N/A  |
| fd96Cb             | single   | single   | yes | #N/A     | #N/A  |
| CG33096            | single   | single   | yes | #N/A     | #N/A  |
| CG33095            | single   | #N/A     | -   | #N/A     | #N/A  |
| Bili               | single   | single   | no  | #N/A     | #N/A  |
| danr               | single   | single   | no  | #N/A     | #N/A  |
| CG34110            | dense    | dense    | no  | multiple | #N/A  |
| dan                | dense    | multiple | yes | single   | #N/A  |
| CG13653            | dense    | single   | yes | #N/A     | #N/A  |
| Cad96Ca            | dense    | #N/A     | -   | #N/A     | #N/A  |
| CG31106            | single   | #N/A     | -   | #N/A     | #N/A  |
| CG31103            | single   | #N/A     | -   | #N/A     | #N/A  |
| CG11851            | single   | #N/A     | -   | #N/A     | #N/A  |
| Cad96Cb            | single   | #N/A     | -   | #N/A     | #N/A  |
| Nup358             | #N/A     | single   | -   | #N/A     | #N/A  |
| CG11857            | #N/A     | single   | -   | #N/A     | #N/A  |
| CG10425            | #N/A     | single   | -   | #N/A     | #N/A  |
| Fur1               | multiple | multiple | yes | dense    | #N/A  |
| Vps33B             | single   | multiple | yes | dense    | #N/A  |
| CG4553             | single   | multiple | yes | #N/A     | #N/A  |
| XNP                | single   | single   | no  | #N/A     | #N/A  |



|           |          |          |     |          |        |
|-----------|----------|----------|-----|----------|--------|
| CG42488   | single   | single   | no  | #N/A     | #N/A   |
| CG5116    | single   | single   | no  | #N/A     | #N/A   |
| Dhap-at   | single   | single   | no  | #N/A     | #N/A   |
| msi       | multiple | dense    | yes | multiple | #N/A   |
| CG4582    | single   | #N/A     |     | #N/A     | #N/A   |
| ymp       | single   | dense    |     | single   | #N/A   |
| Ssadh     | #N/A     | single   |     | single   | #N/A   |
| jigr1     | multiple | multiple | yes | multiple | #N/A   |
| mir-92a   | multiple | multiple | yes | #N/A     | #N/A   |
| mir-92b   | single   | single   | no  | #N/A     | #N/A   |
| tankyrase | single   | single   | no  | single   | #N/A   |
| CG5053    | single   | single   | no  | single   | #N/A   |
| Tsp96F    | single   | single   | no  | multiple | single |
| CG17370   | multiple | multiple | no  | single   | #N/A   |
| Lnk       | multiple | single   | yes | #N/A     | #N/A   |
| CG42235   | single   | #N/A     | -   | #N/A     | #N/A   |
| CG14546   | single   | #N/A     | -   | #N/A     | #N/A   |
| CcapR     | multiple | #N/A     | -   | #N/A     | #N/A   |
| CG14540   | single   | #N/A     | -   | #N/A     | #N/A   |
| CG42261   | single   | #N/A     | -   | #N/A     | #N/A   |
| Nf1       | dense    | dense    | no  | #N/A     | single |
| HLHmdelta | dense    | dense    | no  | dense    | single |
| HLHmgamma | dense    | dense    | no  | dense    | single |
| HLHmbeta  | dense    | dense    | no  | dense    | dense  |
| malpha    | single   | dense    | yes | dense    | dense  |
| m1        | multiple | dense    | yes | dense    | dense  |
| m2        | multiple | dense    | yes | dense    | dense  |
| HLHm3     | dense    | dense    | no  | dense    | dense  |
| m4        | dense    | dense    | yes | dense    | dense  |
| HLHm5     | dense    | dense    | yes | dense    | dense  |
| m6        | multiple | dense    | yes | dense    | dense  |
| HLHm7     | multiple | dense    | yes | dense    | dense  |
| E(spl)    | multiple | dense    | yes | dense    | #N/A   |
| gro       | multiple | dense    | yes | #N/A     | #N/A   |
| exo84     | #N/A     | dense    | -   | #N/A     | #N/A   |
| vps2      | #N/A     | dense    | -   | #N/A     | #N/A   |
| Sld5      | #N/A     | dense    | -   | #N/A     | #N/A   |
| Dak1      | #N/A     | dense    | -   | #N/A     | #N/A   |
| CG14543   | #N/A     | dense    | -   | #N/A     | #N/A   |
| CG14550   | #N/A     | dense    | -   | #N/A     | #N/A   |
| CG42498   | #N/A     | dense    | -   | #N/A     | #N/A   |
| Rpl34a    | #N/A     | dense    | -   | #N/A     | #N/A   |
| CG14544   | #N/A     | dense    | -   | #N/A     | #N/A   |
| CG14551   | #N/A     | dense    | -   | #N/A     | #N/A   |
| dys       | #N/A     | single   | -   | single   | #N/A   |
| CG31323   | single   | #N/A     | -   | #N/A     | dense  |
| CG31086   | single   | #N/A     | -   | #N/A     | dense  |
| CG6073    | single   | #N/A     | -   | #N/A     | dense  |
| CR31084   | single   | #N/A     | -   | #N/A     | #N/A   |
| dei       | single   | #N/A     | -   | #N/A     | #N/A   |
| CG6490    | single   | single   | no  | #N/A     | single |
| scrib     | single   | single   | no  | single   | single |
| beat-VII  | single   | #N/A     | -   | #N/A     | #N/A   |

|                     |          |          |         |          |        |
|---------------------|----------|----------|---------|----------|--------|
| TI                  | multiple | dense    | yes     | dense    | dense  |
| snoRNA:Me28S-U1554  | single   | dense    | yes     | #N/A     | #N/A   |
| Lerp                | single   | #N/A     | -       | #N/A     | dense  |
| CG5500              | dense    | dense    | no      | dense    | dense  |
| ro                  | dense    | dense    | no      | dense    | dense  |
| T48                 | dense    | dense    | no      | dense    | dense  |
| sda                 | multiple | #N/A     | -       | multiple | #N/A   |
| CG14252             | single   | #N/A     | -       | #N/A     | #N/A   |
| tRNA:CR31071        | single   | #N/A     | -       | #N/A     | #N/A   |
| tRNA:CR31070        | single   | #N/A     | -       | #N/A     | #N/A   |
| CG18472             | single   | #N/A     | -       | #N/A     | #N/A   |
| CG6330              | single   | #N/A     | -       | #N/A     | single |
| Tsp97E              | #N/A     | single   | -       | #N/A     | #N/A   |
| Gr97a               | #N/A     | single   | -       | #N/A     | #N/A   |
| CG5521              | #N/A     | single   | -       | single   | #N/A   |
| CG6283              | single   | single   | no      | #N/A     | #N/A   |
| CG6277              | single   | single   | no      | #N/A     | #N/A   |
| CG6271              | single   | single   | no      | #N/A     | #N/A   |
| CG6059              | #N/A     | multiple | -       | #N/A     | #N/A   |
| CG6051              | multiple | multiple | yes     | #N/A     | single |
| Mdh                 | single   | single   | no      | #N/A     | single |
| Ser                 | #N/A     | multiple | -       | single   | #N/A   |
| CG34006             | #N/A     | single   | -       | #N/A     | #N/A   |
| CG17991             | single   | single   | no      | #N/A     | #N/A   |
| CG18766             | single   | single   | no      | single   | #N/A   |
| CG5984              | single   | single   | no      | #N/A     | #N/A   |
| CG5987              | single   | single   | no      | #N/A     | #N/A   |
| woc                 | single   | #N/A     | -       | #N/A     | #N/A   |
| CG14262             | single   | #N/A     | -       | #N/A     | #N/A   |
| CG14260             | single   | #N/A     | -       | #N/A     | #N/A   |
| l(3)mbt             | single   | #N/A     | -       | #N/A     | #N/A   |
| mrt                 | #N/A     | single   | -       | #N/A     | #N/A   |
| CG3368              | #N/A     | single   | -       | #N/A     | #N/A   |
| Klp98A              | single   | single   | yes     | single   | #N/A   |
| CG5646              | single   | #N/A     | -       | single   | #N/A   |
| snmRNA:157          | single   | #N/A     | -       | #N/A     | #N/A   |
| Or98P               | single   | #N/A     | -       | #N/A     | #N/A   |
| Or98a               | single   | #N/A     | -       | #N/A     | #N/A   |
| CG34436             | single   | #N/A     | -       | #N/A     | #N/A   |
| CG34437             | single   | #N/A     | -       | #N/A     | #N/A   |
| larp                | multiple | multiple | yes     | dense    | #N/A   |
| Gfat2               | multiple | multiple | no      | dense    | #N/A   |
| Moca-cyp            | single   | single   | no      | dense    | #N/A   |
| CG12413             | multiple | multiple | same    | #N/A     | #N/A   |
| fkh                 | dense    | multiple | yes     | #N/A     | #N/A   |
| Noa36               | multiple | #N/A     | -       | #N/A     | #N/A   |
| Hrb98DE             | multiple | #N/A     | -       | #N/A     | dense  |
| snoRNA:Psi28S-3405a | single   | single   | dynamic | #N/A     | #N/A   |
| snoRNA:Psi28S-3305a | single   | #N/A     | -       | #N/A     | #N/A   |
| snoRNA:Psi28S-3405b | single   | #N/A     | -       | #N/A     | #N/A   |
| snoRNA:Psi28S-3405c | single   | #N/A     | -       | #N/A     | dense  |
| snoRNA:Psi28S-3305b | single   | #N/A     | -       | #N/A     | dense  |
| snoRNA:Psi28S-3405d | single   | #N/A     | -       | #N/A     | dense  |

|                     |          |          |     |          |          |
|---------------------|----------|----------|-----|----------|----------|
| snoRNA:Psi28S-3305c | single   | #N/A     | -   | #N/A     | dense    |
| CG9986              | single   | #N/A     | -   | #N/A     | dense    |
| CG10011             | multiple | single   | yes | single   | dense    |
| CG9988              | single   | single   | no  | #N/A     | #N/A     |
| WASp                | single   | single   | no  | #N/A     | #N/A     |
| Apc                 | multiple | dense    | yes | single   | #N/A     |
| CG31048             | dense    | dense    | no  | multiple | multiple |
| inx3                | dense    | dense    | no  | single   | single   |
| CG33203             | multiple | single   | yes | #N/A     | #N/A     |
| CG14526             | multiple | single   | yes | #N/A     | #N/A     |
| Doa                 | multiple | single   | yes | #N/A     | #N/A     |
| CG1951              | single   | #N/A     | -   | #N/A     | single   |
| Ssl2                | single   | #N/A     | -   | #N/A     | single   |
| beta4GalNAcTB       | single   | #N/A     | -   | #N/A     | single   |
| Cpsf100             | single   | #N/A     | -   | #N/A     | single   |
| Cul-5               | single   | dense    | yes | single   | #N/A     |
| CG11873             | multiple | dense    | yes | dense    | #N/A     |
| CG11876             | single   | #N/A     | -   | #N/A     | #N/A     |
| CG11877             | single   | #N/A     | -   | #N/A     | #N/A     |
| yemalpha            | multiple | #N/A     | -   | #N/A     | #N/A     |
| CG11880             | single   | #N/A     | -   | #N/A     | #N/A     |
| CG14516             | single   | #N/A     | -   | #N/A     | #N/A     |
| CG14511             | single   | #N/A     | -   | #N/A     | #N/A     |
| CG11882             | single   | #N/A     | -   | #N/A     | #N/A     |
| Pglym78             | single   | #N/A     | -   | #N/A     | #N/A     |
| Rpn2                | single   | #N/A     | -   | #N/A     | #N/A     |
| CG11897             | single   | #N/A     | -   | #N/A     | #N/A     |
| CG11898             | single   | #N/A     | -   | #N/A     | #N/A     |
| CG14509             | single   | #N/A     | -   | #N/A     | #N/A     |
| CR31044             | multiple | dense    | yes | single   | #N/A     |
| mir-279             | multiple | dense    | yes | #N/A     | #N/A     |
| Ef1gamma            | multiple | dense    | yes | #N/A     | #N/A     |
| stg                 | multiple | dense    | yes | dense    | dense    |
| CG14506             | dense    | dense    | yes | #N/A     | #N/A     |
| Cnx99A              | single   | #N/A     | -   | #N/A     | #N/A     |
| Ptp99A              | single   | single   | no  | dense    | #N/A     |
| CG2014              | multiple | multiple | yes | dense    | #N/A     |
| Dr                  | single   | dense    | yes | single   | #N/A     |
| CG7567              | #N/A     | multiple | -   | #N/A     | #N/A     |
| CG11470             | single   | multiple | yes | #N/A     | #N/A     |
| CG31041             | single   | single   | no  | #N/A     | #N/A     |
| alph                | multiple | single   | yes | #N/A     | #N/A     |
| CG7568              | single   | #N/A     | -   | #N/A     | #N/A     |
| CG1907              | single   | #N/A     | -   | #N/A     | #N/A     |
| ppk21               | #N/A     | single   | -   | #N/A     | #N/A     |
| ppk20               | #N/A     | multiple | -   | #N/A     | #N/A     |
| CG18110             | #N/A     | multiple | -   | single   | #N/A     |
| Obp99a              | #N/A     | single   | -   | #N/A     | #N/A     |
| ppk19               | #N/A     | single   | -   | #N/A     | #N/A     |
| dmrt99B             | #N/A     | dense    | -   | #N/A     | #N/A     |
| CG15506             | single   | single   | no  | #N/A     | #N/A     |
| CG34296             | single   | single   | no  | #N/A     | #N/A     |
| Pcd                 | single   | single   | no  | #N/A     | #N/A     |

|                     |          |          |     |          |        |
|---------------------|----------|----------|-----|----------|--------|
| CG7593              | single   | single   | no  | #N/A     | #N/A   |
| CG18731             | single   | single   | no  | #N/A     | #N/A   |
| kay                 | multiple | multiple | yes | dense    | single |
| fig                 | #N/A     | single   | -   | #N/A     | #N/A   |
| CG31036             | single   | #N/A     | -   | #N/A     | #N/A   |
| capa                | single   | #N/A     | -   | #N/A     | #N/A   |
| trp                 | single   | #N/A     | -   | #N/A     | #N/A   |
| CG7896              | single   | #N/A     | -   | #N/A     | #N/A   |
| Acph-1              | single   | #N/A     | -   | #N/A     | #N/A   |
| CG7920              | single   | #N/A     | -   | #N/A     | #N/A   |
| Mgat2               | multiple | single   | yes | #N/A     | #N/A   |
| RpS28a              | single   | single   | no  | #N/A     | #N/A   |
| Axn                 | single   | single   | no  | #N/A     | #N/A   |
| janB                | single   | #N/A     | -   | #N/A     | #N/A   |
| janA                | single   | #N/A     | -   | #N/A     | #N/A   |
| Sry-beta            | multiple | #N/A     | -   | #N/A     | #N/A   |
| Sry-alpha           | multiple | single   | yes | #N/A     | #N/A   |
| Sry-delta           | multiple | single   | yes | #N/A     | single |
| RpL32               | multiple | single   | yes | #N/A     | single |
| CG7943              | multiple | single   | yes | #N/A     | single |
| CG15528             | single   | single   | no  | #N/A     | single |
| CG11498             | single   | #N/A     | -   | #N/A     | #N/A   |
| CG9743              | single   | #N/A     | -   | #N/A     | #N/A   |
| RpS7                | multiple | #N/A     | -   | #N/A     | #N/A   |
| snoRNA:Psi28S-2149  | single   | #N/A     | -   | #N/A     | #N/A   |
| snoRNA:Psi18S-1377e | single   | #N/A     | -   | #N/A     | #N/A   |
| snoRNA:Psi18S-1377d | single   | #N/A     | -   | #N/A     | #N/A   |
| snoRNA:Psi18S-1377c | single   | #N/A     | -   | #N/A     | #N/A   |
| snoRNA:Psi18S-1377b | single   | #N/A     | -   | #N/A     | #N/A   |
| snoRNA:Psi18S-1377a | single   | #N/A     | -   | #N/A     | #N/A   |
| snoRNA:Psi28S-2626  | single   | single   | yes | #N/A     | #N/A   |
| Anp                 | single   | #N/A     | -   | #N/A     | #N/A   |
| CecA1               | single   | #N/A     | -   | #N/A     | #N/A   |
| Cec-Psi1            | single   | #N/A     | -   | #N/A     | #N/A   |
| CecA2               | single   | #N/A     | -   | #N/A     | #N/A   |
| Cec2                | single   | single   | yes | #N/A     | #N/A   |
| CecC                | #N/A     | single   | -   | #N/A     | #N/A   |
| hdc                 | multiple | multiple | no  | multiple | #N/A   |
| Fer1HCH             | single   | multiple | yes | #N/A     | #N/A   |
| Fer2LCH             | #N/A     | multiple | -   | #N/A     | #N/A   |
| CG2217              | #N/A     | single   | -   | #N/A     | #N/A   |
| aralar1             | single   | #N/A     | -   | #N/A     | #N/A   |
| CG2224              | single   | #N/A     | -   | #N/A     | #N/A   |
| CDase               | multiple | single   | yes | single   | dense  |
| PH4alphaEFB         | multiple | dense    | yes | dense    | dense  |
| spdo                | single   | dense    | yes | dense    | #N/A   |
| tmod                | dense    | single   | yes | #N/A     | #N/A   |
| CG34155             | dense    | #N/A     | -   | #N/A     | #N/A   |
| CG9702              | single   | #N/A     | -   | #N/A     | #N/A   |
| CG2246              | single   | single   | no  | single   | #N/A   |
| CG31019             | single   | single   | no  | #N/A     | #N/A   |
| CG31021             | single   | single   | no  | #N/A     | #N/A   |
| PH4alphaNE3         | single   | single   | no  | #N/A     | #N/A   |

|             |          |          |     |          |        |
|-------------|----------|----------|-----|----------|--------|
| PH4alphaPV  | single   | #N/A     | -   | #N/A     | #N/A   |
| CG34432     | single   | #N/A     | -   | #N/A     | #N/A   |
| CG34433     | single   | #N/A     | -   | #N/A     | #N/A   |
| CG11313     | #N/A     | multiple | -   | single   | #N/A   |
| CG15543     | #N/A     | multiple | -   | single   | #N/A   |
| Npc2g       | #N/A     | single   | -   | #N/A     | #N/A   |
| Npc2h       | #N/A     | single   | -   | single   | #N/A   |
| zfh1        | multiple | dense    | yes | single   | single |
| wts         | multiple | multiple | yes | dense    | #N/A   |
| dj-1beta    | single   | multiple | yes | dense    | #N/A   |
| CG31012     | multiple | multiple | yes | #N/A     | #N/A   |
| tll         | dense    | multiple | yes | single   | #N/A   |
| CG33483     | single   | single   | no  | #N/A     | #N/A   |
| Ptx1        | multiple | dense    | yes | dense    | single |
| CG15550     | #N/A     | single   | -   | #N/A     | #N/A   |
| CanA1       | #N/A     | single   | -   | single   | #N/A   |
| CG33920     | #N/A     | single   | -   | #N/A     | #N/A   |
| dco         | #N/A     | single   | -   | single   | #N/A   |
| Sox100B     | #N/A     | multiple | -   | #N/A     | #N/A   |
| Gycbeta100B | single   | #N/A     | -   | #N/A     | #N/A   |
| stops       | single   | #N/A     | -   | #N/A     | #N/A   |
| CG31004     | dense    | #N/A     | -   | #N/A     | #N/A   |
| bnk         | dense    | #N/A     | -   | #N/A     | #N/A   |
| CG1746      | dense    | single   | yes | dense    | single |
| RNaseP:RNA  | dense    | #N/A     | -   | #N/A     | single |
| CG12054     | dense    | single   | yes | dense    | single |
| CG15555     | single   | #N/A     | -   | #N/A     | #N/A   |
| CG11337     | single   | multiple | yes | single   | #N/A   |
| Gprk2       | single   | multiple | yes | single   | #N/A   |
| CG1499      | single   | multiple | yes | multiple | #N/A   |
| CycG        | single   | dense    | yes | single   | #N/A   |
| Med         | single   | dense    | yes | #N/A     | #N/A   |
| CG1815      | #N/A     | single   | -   | #N/A     | #N/A   |
| CG11550     | multiple | #N/A     | -   | #N/A     | #N/A   |
| CG34046     | dense    | #N/A     | -   | #N/A     | single |
| ttk         | single   | dense    | yes | dense    | #N/A   |
| CG1896      | #N/A     | multiple | -   | #N/A     | #N/A   |
| awd         | single   | multiple | yes | #N/A     | #N/A   |
| CG1910      | single   | multiple | yes | dense    | #N/A   |
| nero        | single   | multiple | yes | dense    | #N/A   |
| heph        | multiple | multiple | no  | single   | single |
| krz         | #N/A     | single   | -   | single   | #N/A   |
| Map205      | single   | #N/A     | -   | #N/A     | #N/A   |
| CG13377     | single   | #N/A     | -   | #N/A     | #N/A   |
| ewg         | #N/A     | single   | -   | #N/A     | #N/A   |
| CG3777      | #N/A     | single   | -   | #N/A     | #N/A   |
| CG32816     | dense    | dense    | yes | multiple | #N/A   |
| y           | #N/A     | single   | -   | #N/A     | #N/A   |
| ac          | single   | #N/A     | -   | #N/A     | #N/A   |
| sc          | single   | single   | yes | #N/A     | #N/A   |
| l(1)sc      | dense    | dense    | yes | single   | #N/A   |
| ase         | dense    | dense    | no  | #N/A     | #N/A   |
| Cyp4g1      | dense    | dense    | no  | single   | #N/A   |

|                    |          |          |     |          |        |
|--------------------|----------|----------|-----|----------|--------|
| Exp6               | dense    | #N/A     | -   | #N/A     | #N/A   |
| CG17896            | #N/A     | single   | -   | #N/A     | #N/A   |
| CG17778            | #N/A     | single   | -   | multiple | #N/A   |
| svr                | #N/A     | single   | -   | multiple | #N/A   |
| arg                | multiple | dense    | yes | multiple | dense  |
| elav               | multiple | dense    | yes | single   | dense  |
| CG4293             | single   | dense    | yes | #N/A     | #N/A   |
| Appl               | #N/A     | dense    | -   | #N/A     | #N/A   |
| vnd                | dense    | dense    | no  | multiple | single |
| CG13366            | single   | dense    | yes | #N/A     | single |
| CG17829            | single   | #N/A     | -   | #N/A     | #N/A   |
| RpL36              | single   | #N/A     | -   | #N/A     | #N/A   |
| l(1)1Bi            | single   | #N/A     | -   | #N/A     | #N/A   |
| Dredd              | #N/A     | single   | -   | #N/A     | #N/A   |
| su(s)              | #N/A     | single   | -   | #N/A     | #N/A   |
| Suv4-20            | single   | single   | no  | #N/A     | #N/A   |
| skpA               | single   | single   | no  | #N/A     | #N/A   |
| sdk                | single   | multiple | yes | single   | dense  |
| CG5254             | single   | single   | no  | #N/A     | #N/A   |
| CG5273             | single   | single   | no  | #N/A     | #N/A   |
| RpL22              | single   | dense    | yes | #N/A     | #N/A   |
| CR42491            | #N/A     | dense    | -   | #N/A     | #N/A   |
| snoRNA:Psi18S-531  | #N/A     | dense    | -   | #N/A     | #N/A   |
| snoRNA:Psi28S-2179 | #N/A     | dense    | -   | #N/A     | #N/A   |
| fz3                | single   | dense    | yes | single   | single |
| CG16989            | #N/A     | single   | -   | single   | #N/A   |
| Rbf                | #N/A     | single   | -   | single   | #N/A   |
| CG13359            | #N/A     | single   | -   | #N/A     | #N/A   |
| CG13358            | #N/A     | single   | -   | #N/A     | #N/A   |
| Sec22              | #N/A     | multiple | -   | #N/A     | #N/A   |
| CG42248            | #N/A     | multiple | -   | #N/A     | #N/A   |
| CG3706             | single   | single   | no  | #N/A     | #N/A   |
| CG32815            | single   | single   | no  | #N/A     | #N/A   |
| TRAM               | single   | single   | no  | #N/A     | #N/A   |
| CG3655             | multiple | dense    | yes | single   | #N/A   |
| CG14628            | #N/A     | single   | -   | #N/A     | #N/A   |
| CG11382            | #N/A     | single   | -   | #N/A     | #N/A   |
| CG11398            | #N/A     | single   | -   | #N/A     | #N/A   |
| CG3638             | dense    | dense    | yes | dense    | #N/A   |
| CG11403            | dense    | dense    | yes | #N/A     | #N/A   |
| A3-3               | single   | single   | no  | #N/A     | #N/A   |
| DAAM               | #N/A     | multiple | -   | #N/A     | single |
| fs(1)N             | #N/A     | single   | -   | #N/A     | #N/A   |
| CG11448            | single   | single   | no  | #N/A     | #N/A   |
| Gr2a               | #N/A     | single   | -   | #N/A     | #N/A   |
| CG14785            | #N/A     | single   | -   | #N/A     | #N/A   |
| CG14786            | #N/A     | single   | -   | #N/A     | #N/A   |
| CG14782            | single   | single   | no  | #N/A     | #N/A   |
| sta                | single   | single   | no  | single   | #N/A   |
| snoRNA:M           | single   | single   | no  | #N/A     | #N/A   |
| snoRNA:Me28S-G980  | single   | single   | no  | #N/A     | #N/A   |
| Nmdar2             | single   | single   | no  | #N/A     | #N/A   |
| CG32810            | single   | single   | no  | single   | #N/A   |

|         |          |          |     |        |          |
|---------|----------|----------|-----|--------|----------|
| dor     | single   | #N/A     | -   | #N/A   | #N/A     |
| CG3740  | single   | #N/A     | -   | #N/A   | #N/A     |
| hfw     | single   | #N/A     | -   | #N/A   | #N/A     |
| Adar    | single   | single   | no  | #N/A   | #N/A     |
| CG32806 | single   | #N/A     | -   | #N/A   | #N/A     |
| CG14810 | multiple | #N/A     | -   | #N/A   | #N/A     |
| CG14811 | multiple | #N/A     | -   | #N/A   | #N/A     |
| CG42666 | multiple | #N/A     | -   | #N/A   | #N/A     |
| arm     | single   | single   | no  | dense  | #N/A     |
| CG32803 | single   | single   | no  | dense  | #N/A     |
| CG32801 | single   | single   | no  | #N/A   | #N/A     |
| CG3587  | #N/A     | dense    | -   | #N/A   | #N/A     |
| CG3600  | multiple | dense    | yes | dense  | #N/A     |
| CG42527 | single   | single   | no  | #N/A   | #N/A     |
| Hr4     | single   | single   | no  | #N/A   | #N/A     |
| CG4406  | single   | dense    | yes | single | #N/A     |
| east    | single   | dense    | yes | #N/A   | #N/A     |
| Actn    | single   | single   | no  | #N/A   | #N/A     |
| moody   | #N/A     | single   | -   | #N/A   | #N/A     |
| CG4313  | #N/A     | single   | -   | #N/A   | #N/A     |
| CG4281  | single   | #N/A     | -   | #N/A   | #N/A     |
| CG14054 | single   | #N/A     | -   | #N/A   | #N/A     |
| CG4199  | single   | #N/A     | -   | #N/A   | #N/A     |
| CG4194  | single   | #N/A     | -   | #N/A   | #N/A     |
| CG4025  | #N/A     | single   | -   | #N/A   | #N/A     |
| CG16903 | #N/A     | single   | -   | #N/A   | #N/A     |
| Unc-76  | single   | multiple | yes | #N/A   | single   |
| csw     | single   | #N/A     | -   | #N/A   | dense    |
| ph-d    | dense    | dense    | no  | dense  | #N/A     |
| ph-p    | dense    | dense    | yes | dense  | #N/A     |
| CG3835  | dense    | dense    | yes | dense  | #N/A     |
| Pgd     | dense    | dense    | yes | #N/A   | #N/A     |
| bcn92   | dense    | dense    | no  | #N/A   | #N/A     |
| wapl    | #N/A     | single   | -   | #N/A   | #N/A     |
| Cyp4d1  | #N/A     | single   | -   | #N/A   | #N/A     |
| CG2865  | dense    | dense    | yes | dense  | single   |
| CG34052 | dense    | dense    | yes | #N/A   | #N/A     |
| CG14050 | single   | dense    | yes | #N/A   | #N/A     |
| CG2854  | single   | dense    | yes | #N/A   | #N/A     |
| CG33218 | #N/A     | dense    | -   | #N/A   | #N/A     |
| llp6    | #N/A     | dense    | -   | single | #N/A     |
| phl     | #N/A     | dense    | -   | single | #N/A     |
| ptr     | #N/A     | single   | -   | single | single   |
| PsGEF   | multiple | dense    | yes | dense  | #N/A     |
| CG12496 | multiple | multiple | no  | single | #N/A     |
| gt      | dense    | #N/A     | -   | #N/A   | #N/A     |
| tko     | single   | #N/A     | -   | single | dense    |
| boi     | dense    | dense    | no  | dense  | dense    |
| trol    | dense    | dense    | no  | #N/A   | #N/A     |
| CG32795 | #N/A     | single   | -   | dense  | #N/A     |
| rst     | dense    | dense    | yes | single | multiple |
| kirre   | dense    | dense    | yes | dense  | dense    |
| N       | multiple | dense    | yes | dense  | dense    |

|           |          |          |     |          |        |
|-----------|----------|----------|-----|----------|--------|
| CG18508   | #N/A     | single   | -   | #N/A     | #N/A   |
| Fcp3C     | #N/A     | single   | -   | #N/A     | #N/A   |
| CG3939    | #N/A     | single   | -   | #N/A     | #N/A   |
| dnc       | multiple | dense    | yes | #N/A     | #N/A   |
| dm        | #N/A     | single   | -   | #N/A     | #N/A   |
| CG12535   | dense    | single   | yes | multiple | #N/A   |
| AlstR     | single   | #N/A     | -   | #N/A     | #N/A   |
| Mnt       | single   | multiple | yes | #N/A     | #N/A   |
| Rala      | single   | dense    | yes | #N/A     | #N/A   |
| tlk       | dense    | dense    | no  | dense    | single |
| fd3F      | multiple | single   | yes | #N/A     | #N/A   |
| ec        | dense    | dense    | yes | dense    | #N/A   |
| tRNA:P:3E | single   | single   | yes | #N/A     | #N/A   |
| CG2901    | single   | single   | no  | #N/A     | #N/A   |
| roX1      | single   | multiple | yes | #N/A     | #N/A   |
| yin       | single   | multiple | yes | #N/A     | #N/A   |
| CG34336   | single   | #N/A     | -   | #N/A     | #N/A   |
| CG2930    | single   | #N/A     | -   | single   | #N/A   |
| Vap-33-1  | single   | #N/A     | -   | #N/A     | #N/A   |
| lva       | single   | #N/A     | -   | #N/A     | #N/A   |
| CG15375   | dense    | #N/A     | -   | #N/A     | #N/A   |
| Xpac      | dense    | dense    | yes | #N/A     | #N/A   |
| brn       | dense    | dense    | yes | dense    | #N/A   |
| cib       | dense    | dense    | yes | dense    | #N/A   |
| CG6133    | dense    | dense    | yes | #N/A     | #N/A   |
| GlcAT-I   | single   | single   | no  | #N/A     | #N/A   |
| Fas2      | multiple | dense    | yes | single   | #N/A   |
| CG15571   | #N/A     | single   | -   | #N/A     | #N/A   |
| CG15570   | single   | #N/A     | -   | #N/A     | #N/A   |
| norpA     | single   | single   | no  | #N/A     | #N/A   |
| CG32773   | #N/A     | single   | -   | #N/A     | #N/A   |
| bi        | multiple | multiple | yes | dense    | single |
| CG3546    | single   | dense    | yes | #N/A     | #N/A   |
| CG12684   | #N/A     | dense    | -   | #N/A     | #N/A   |
| peb       | single   | multiple | yes | #N/A     | single |
| CG3062    | #N/A     | single   | -   | #N/A     | #N/A   |
| HLH4C     | #N/A     | single   | -   | #N/A     | #N/A   |
| mRpl30    | #N/A     | single   | -   | #N/A     | #N/A   |
| torp4a    | #N/A     | single   | -   | #N/A     | #N/A   |
| Cbp80     | #N/A     | single   | -   | #N/A     | #N/A   |
| rap       | single   | single   | yes | #N/A     | #N/A   |
| Pp2C1     | multiple | #N/A     | -   | single   | #N/A   |
| ctp       | single   | #N/A     | -   | single   | #N/A   |
| CG2861    | single   | #N/A     | -   | #N/A     | #N/A   |
| CG12681   | single   | #N/A     | -   | #N/A     | #N/A   |
| CG6927    | #N/A     | single   | -   | #N/A     | #N/A   |
| CG32772   | #N/A     | single   | -   | #N/A     | #N/A   |
| CG4041    | #N/A     | dense    | -   | #N/A     | #N/A   |
| CG6903    | dense    | dense    | yes | #N/A     | #N/A   |
| CG4068    | dense    | dense    | yes | single   | #N/A   |
| Ptp4E     | single   | dense    | yes | #N/A     | #N/A   |
| SIP3      | #N/A     | single   | -   | dense    | #N/A   |
| ovo       | single   | multiple | yes | dense    | single |



|                |          |          |     |          |        |
|----------------|----------|----------|-----|----------|--------|
| CG32767        | dense    | multiple | yes | single   | #N/A   |
| rg             | dense    | multiple | yes | #N/A     | #N/A   |
| CG15786        | single   | #N/A     | -   | #N/A     | #N/A   |
| Rnp4F          | #N/A     | single   | -   | #N/A     | #N/A   |
| Mcm3           | #N/A     | single   | -   | #N/A     | #N/A   |
| SK             | single   | #N/A     | -   | #N/A     | #N/A   |
| yu             | multiple | single   | yes | single   | #N/A   |
| CG4165         | multiple | #N/A     | -   | #N/A     | #N/A   |
| Vsx2           | single   | multiple | yes | #N/A     | #N/A   |
| Vsx1           | single   | multiple | yes | single   | #N/A   |
| CG42492        | #N/A     | single   | -   | single   | #N/A   |
| CG4119         | single   | single   | no  | #N/A     | #N/A   |
| Rab-RP4        | single   | single   | no  | #N/A     | #N/A   |
| RpL35          | single   | single   | no  | #N/A     | #N/A   |
| Tre1           | multiple | multiple | no  | multiple | #N/A   |
| Tre            | multiple | multiple | no  | #N/A     | #N/A   |
| CG3160         | single   | single   | no  | single   | #N/A   |
| cv             | single   | single   | no  | single   | #N/A   |
| CG3149         | single   | multiple | yes | single   | #N/A   |
| CG4096         | #N/A     | single   | -   | #N/A     | #N/A   |
| CG32758        | single   | #N/A     | -   | single   | #N/A   |
| CG3125         | multiple | single   | yes | multiple | #N/A   |
| CG4078         | single   | single   | no  | single   | #N/A   |
| CG15772        | single   | single   | no  | #N/A     | #N/A   |
| lin-52         | single   | single   | no  | #N/A     | #N/A   |
| CG15771        | single   | single   | no  | #N/A     | #N/A   |
| MAPk-Ak2       | single   | single   | no  | #N/A     | #N/A   |
| CG15770        | single   | single   | no  | #N/A     | #N/A   |
| CG3097         | multiple | multiple | no  | single   | single |
| CG42264        | single   | single   | no  | #N/A     | single |
| CG3016         | #N/A     | single   | -   | #N/A     | #N/A   |
| CG16721        | single   | multiple | yes | #N/A     | #N/A   |
| Act5C          | single   | multiple | yes | dense    | #N/A   |
| CG4020         | multiple | single   | yes | #N/A     | dense  |
| CG12236        | multiple | single   | yes | #N/A     | dense  |
| mab-21         | #N/A     | multiple | -   | #N/A     | #N/A   |
| rux            | #N/A     | multiple | -   | #N/A     | #N/A   |
| CG5921         | single   | #N/A     | -   | #N/A     | #N/A   |
| Mipp2          | single   | single   | no  | #N/A     | #N/A   |
| raptor         | single   | single   | no  | #N/A     | #N/A   |
| Nep1           | single   | single   | no  | #N/A     | #N/A   |
| Top3beta       | single   | single   | no  | #N/A     | #N/A   |
| wuho           | single   | single   | no  | #N/A     | #N/A   |
| Rpt4           | single   | single   | no  | #N/A     | #N/A   |
| CG42240        | single   | #N/A     | -   | #N/A     | #N/A   |
| CG3847         | #N/A     | single   | -   | #N/A     | #N/A   |
| CG3446         | #N/A     | single   | -   | #N/A     | #N/A   |
| kdn            | #N/A     | single   | -   | #N/A     | #N/A   |
| Spat           | single   | single   | no  | #N/A     | dense  |
| RpL7A          | single   | single   | no  | single   | dense  |
| snoRNA:Or-CD10 | single   | single   | no  | #N/A     | dense  |
| dx             | single   | single   | no  | single   | dense  |
| CG34417        | single   | #N/A     | -   | #N/A     | #N/A   |

|                     |          |          |     |          |          |
|---------------------|----------|----------|-----|----------|----------|
| APC7                | #N/A     | single   | -   | single   | #N/A     |
| CG3973              | #N/A     | multiple | -   | #N/A     | #N/A     |
| CG14441             | single   | single   | no  | multiple | single   |
| RpL17               | #N/A     | single   | -   | single   | #N/A     |
| snoRNA:Psi28S-3436b | #N/A     | single   | -   | #N/A     | #N/A     |
| snoRNA:Psi28S-3436a | #N/A     | single   | -   | #N/A     | #N/A     |
| snoRNA:Psi28S-1060  | #N/A     | single   | -   | #N/A     | #N/A     |
| snoRNA:Psi28S-1232  | #N/A     | single   | -   | #N/A     | #N/A     |
| tRNA:CR32740        | #N/A     | single   | -   | #N/A     | #N/A     |
| COQ7                | #N/A     | dense    | -   | #N/A     | #N/A     |
| shf                 | single   | dense    | yes | single   | #N/A     |
| C3G                 | single   | single   | no  | multiple | #N/A     |
| pod1                | single   | single   | no  | multiple | #N/A     |
| iav                 | single   | #N/A     | -   | #N/A     | #N/A     |
| Nf-YC               | single   | #N/A     | -   | #N/A     | #N/A     |
| Atx-1               | single   | #N/A     | -   | #N/A     | #N/A     |
| CG4542              | single   | #N/A     | -   | #N/A     | #N/A     |
| CG4558              | single   | #N/A     | -   | #N/A     | #N/A     |
| CG14434             | multiple | #N/A     | -   | #N/A     | #N/A     |
| CG33691             | multiple | dense    | yes | dense    | #N/A     |
| CG33692             | multiple | dense    | yes | dense    | #N/A     |
| ogre                | single   | dense    | yes | #N/A     | multiple |
| bou                 | multiple | dense    | yes | multiple | #N/A     |
| inx7                | multiple | dense    | yes | dense    | #N/A     |
| inx2                | multiple | dense    | yes | dense    | #N/A     |
| CG12541             | dense    | #N/A     | -   | #N/A     | #N/A     |
| CG14427             | multiple | #N/A     | -   | #N/A     | #N/A     |
| nullo               | single   | #N/A     | -   | #N/A     | #N/A     |
| CG14425             | dense    | single   | yes | multiple | single   |
| Sxl                 | dense    | single   | yes | multiple | single   |
| CG4615              | dense    | single   | yes | single   | #N/A     |
| fz4                 | single   | #N/A     | -   | #N/A     | #N/A     |
| CR32730             | single   | dense    | yes | #N/A     | #N/A     |
| CG9650              | #N/A     | dense    | -   | multiple | #N/A     |
| CG1958              | multiple | multiple | no  | #N/A     | #N/A     |
| CG1677              | single   | #N/A     | -   | #N/A     | multiple |
| CG2059              | single   | #N/A     | -   | #N/A     | #N/A     |
| unc-119             | dense    | dense    | yes | dense    | single   |
| brk                 | single   | dense    | yes | #N/A     | #N/A     |
| Atg5                | dense    | dense    | yes | dense    | single   |
| Dok                 | dense    | dense    | yes | #N/A     | #N/A     |
| CBP                 | single   | dense    | yes | single   | #N/A     |
| CG32720             | single   | #N/A     | -   | #N/A     | #N/A     |
| CG11369             | #N/A     | dense    | -   | #N/A     | #N/A     |
| CG12689             | single   | single   | no  | #N/A     | #N/A     |
| ct                  | single   | single   | yes | single   | #N/A     |
| CG15478             | multiple | #N/A     | -   | #N/A     | single   |
| Hira                | single   | single   | no  | #N/A     | #N/A     |
| NELF-B              | single   | single   | no  | #N/A     | #N/A     |
| Tom40               | #N/A     | single   | -   | #N/A     | #N/A     |
| CG10932             | #N/A     | dense    | -   | #N/A     | #N/A     |
| Nek2                | single   | dense    | yes | single   | #N/A     |
| CG18624             | single   | dense    | yes | single   | #N/A     |

|                |          |          |     |          |          |
|----------------|----------|----------|-----|----------|----------|
| p115           | single   | dense    | yes | #N/A     | #N/A     |
| CR33222        | single   | single   | no  | single   | #N/A     |
| RpS6           | single   | single   | no  | single   | #N/A     |
| snoRNA:Or-aca2 | single   | single   | no  | #N/A     | #N/A     |
| bys            | single   | single   | no  | single   | #N/A     |
| RpS14a         | #N/A     | multiple | -   | #N/A     | #N/A     |
| RpS14b         | single   | multiple | yes | #N/A     | #N/A     |
| CG42593        | single   | multiple | yes | multiple | #N/A     |
| l(1)G0193      | single   | multiple | yes | multiple | #N/A     |
| sws            | #N/A     | multiple | -   | single   | dense    |
| sn             | #N/A     | multiple | -   | single   | dense    |
| Tbh            | single   | #N/A     | -   | #N/A     | #N/A     |
| fs(1)h         | single   | single   | yes | dense    | #N/A     |
| mys            | single   | #N/A     | -   | dense    | #N/A     |
| Smox           | #N/A     | single   | -   | single   | #N/A     |
| CG17982        | #N/A     | single   | -   | single   | #N/A     |
| CG2263         | #N/A     | single   | -   | #N/A     | #N/A     |
| sdt            | multiple | multiple | no  | multiple | single   |
| CG1632         | multiple | single   | yes | #N/A     | #N/A     |
| Corp           | multiple | single   | yes | #N/A     | #N/A     |
| CG15343        | multiple | single   | yes | #N/A     | #N/A     |
| CG1636         | multiple | single   | yes | #N/A     | #N/A     |
| CG11190        | single   | #N/A     | -   | #N/A     | #N/A     |
| CG32711        | dense    | dense    | yes | #N/A     | #N/A     |
| Trf2           | dense    | dense    | yes | single   | single   |
| CG12125        | #N/A     | single   | -   | #N/A     | #N/A     |
| CG1440         | #N/A     | single   | -   | #N/A     | #N/A     |
| CG12123        | #N/A     | single   | -   | #N/A     | single   |
| CG32713        | #N/A     | single   | -   | single   | #N/A     |
| CG15347        | #N/A     | single   | -   | single   | #N/A     |
| Es2            | #N/A     | single   | -   | single   | #N/A     |
| l(1)G0095      | #N/A     | single   | -   | #N/A     | #N/A     |
| CG12112        | #N/A     | single   | -   | dense    | #N/A     |
| Trf4-1         | #N/A     | single   | -   | dense    | #N/A     |
| CG12081        | #N/A     | multiple | -   | #N/A     | #N/A     |
| CG12659        | #N/A     | multiple | -   | #N/A     | #N/A     |
| Crag           | #N/A     | multiple | -   | #N/A     | #N/A     |
| oc             | multiple | dense    | yes | #N/A     | single   |
| CG12772        | multiple | multiple | no  | single   | multiple |
| CG11284        | single   | single   | no  | #N/A     | single   |
| Lim1           | multiple | dense    | yes | multiple | single   |
| CG32710        | multiple | #N/A     | -   | #N/A     | #N/A     |
| Moe            | #N/A     | single   | -   | single   | single   |
| rdgA           | multiple | #N/A     | -   | single   | single   |
| CG12661        | single   | #N/A     | -   | #N/A     | single   |
| CG10962        | multiple | multiple | yes | single   | single   |
| CG42388        | single   | multiple | yes | single   | single   |
| AP-1gamma      | #N/A     | single   | -   | #N/A     | single   |
| fend           | multiple | dense    | yes | dense    | single   |
| His3.3B        | #N/A     | single   | -   | #N/A     | #N/A     |
| CG11042        | #N/A     | single   | -   | #N/A     | #N/A     |
| Ost48          | #N/A     | single   | -   | #N/A     | #N/A     |
| Dip1           | #N/A     | single   | -   | #N/A     | #N/A     |

|             |          |          |     |          |        |
|-------------|----------|----------|-----|----------|--------|
| CG12115     | single   | #N/A     | -   | #N/A     | dense  |
| mxc         | single   | #N/A     | -   | #N/A     | #N/A   |
| CG42569     | single   | #N/A     | -   | #N/A     | #N/A   |
| amx         | single   | #N/A     | -   | #N/A     | #N/A   |
| CG42611     | multiple | single   | yes | #N/A     | #N/A   |
| l(1)G0320   | single   | single   | no  | dense    | single |
| RpS28b      | single   | single   | no  | dense    | single |
| CG15317     | single   | single   | no  | dense    | single |
| CG32699     | #N/A     | single   | -   | #N/A     | #N/A   |
| CG42395     | #N/A     | single   | -   | #N/A     | #N/A   |
| Hex-A       | single   | multiple | yes | #N/A     | #N/A   |
| l(1)G0232   | multiple | multiple | yes | single   | single |
| CG3106      | single   | single   | no  | single   | #N/A   |
| nej         | multiple | multiple | yes | single   | #N/A   |
| CG42657     | multiple | multiple | yes | #N/A     | #N/A   |
| btd         | multiple | multiple | yes | #N/A     | #N/A   |
| Sp1         | multiple | multiple | yes | multiple | #N/A   |
| CG2990      | #N/A     | single   | -   | #N/A     | single |
| CG2972      | dense    | multiple | yes | #N/A     | #N/A   |
| CG2974      | dense    | multiple | yes | dense    | #N/A   |
| CG34104     | dense    | multiple | yes | dense    | #N/A   |
| CG12645     | single   | #N/A     | -   | #N/A     | #N/A   |
| CG15309     | single   | #N/A     | -   | #N/A     | single |
| l(1)G0230   | single   | #N/A     | -   | #N/A     | #N/A   |
| CG2962      | multiple | #N/A     | -   | #N/A     | #N/A   |
| CG15308     | single   | #N/A     | -   | #N/A     | #N/A   |
| CG34408     | single   | #N/A     | -   | #N/A     | #N/A   |
| alpha-Man-I | #N/A     | single   | -   | #N/A     | #N/A   |
| CG2909      | #N/A     | single   | -   | #N/A     | #N/A   |
| Gip         | #N/A     | single   | -   | #N/A     | #N/A   |
| CG32683     | single   | #N/A     | -   | #N/A     | #N/A   |
| Or9a        | single   | #N/A     | -   | #N/A     | #N/A   |
| Neb-cGP     | single   | #N/A     | -   | #N/A     | #N/A   |
| CG17255     | multiple | multiple | no  | #N/A     | #N/A   |
| CG2889      | single   | multiple | yes | #N/A     | #N/A   |
| CG2887      | #N/A     | multiple | -   | #N/A     | #N/A   |
| spri        | multiple | #N/A     | -   | #N/A     | #N/A   |
| X11Lbeta    | single   | single   | no  | #N/A     | #N/A   |
| CG32676     | multiple | dense    | yes | dense    | single |
| ras         | single   | dense    | yes | dense    | single |
| Atg8a       | single   | single   | no  | single   | #N/A   |
| CG1826      | single   | single   | no  | single   | #N/A   |
| Imp         | dense    | dense    | yes | dense    | #N/A   |
| CG1637      | #N/A     | single   | -   | #N/A     | single |
| Ork1        | #N/A     | single   | -   | #N/A     | single |
| CG15208     | single   | single   | no  | #N/A     | #N/A   |
| CG15207     | single   | single   | no  | #N/A     | single |
| CG2145      | single   | dense    | yes | #N/A     | single |
| CG42339     | single   | #N/A     | -   | #N/A     | #N/A   |
| CG11160     | single   | #N/A     | -   | #N/A     | #N/A   |
| CG42249     | single   | #N/A     | -   | #N/A     | #N/A   |
| Hsp60       | single   | #N/A     | -   | #N/A     | #N/A   |
| CG11122     | single   | #N/A     | -   | #N/A     | #N/A   |

|                   |          |          |     |          |          |
|-------------------|----------|----------|-----|----------|----------|
| CG15201           | single   | single   | no  | #N/A     | #N/A     |
| ran               | single   | single   | no  | #N/A     | #N/A     |
| CG1908            | multiple | multiple | no  | #N/A     | #N/A     |
| rtv               | single   | single   | no  | single   | #N/A     |
| Dlic              | single   | single   | no  | single   | #N/A     |
| CG32668           | single   | single   | no  | #N/A     | #N/A     |
| sisA              | dense    | #N/A     | -   | #N/A     | #N/A     |
| l(1)10Bb          | dense    | #N/A     | -   | #N/A     | #N/A     |
| CG1657            | dense    | #N/A     | -   | #N/A     | #N/A     |
| Kap3              | single   | single   | no  | multiple | #N/A     |
| CG34348           | single   | single   | no  | multiple | #N/A     |
| dlg1              | single   | #N/A     | -   | single   | #N/A     |
| Gs2               | #N/A     | single   | -   | #N/A     | #N/A     |
| CG11727           | single   | single   | no  | #N/A     | single   |
| HP5               | single   | single   | no  | #N/A     | single   |
| CG33235           | #N/A     | multiple | -   | #N/A     | #N/A     |
| CG32666           | multiple | multiple | yes | single   | #N/A     |
| rho-4             | single   | #N/A     | -   | #N/A     | single   |
| Ptp10D            | single   | multiple | yes | single   | single   |
| CG2371            | single   | multiple | yes | #N/A     | single   |
| bif               | #N/A     | single   | -   | single   | multiple |
| PhKgamma          | single   | #N/A     | -   | single   | multiple |
| CG2444            | single   | #N/A     | -   | #N/A     | single   |
| Amun              | single   | #N/A     | -   | dense    | #N/A     |
| CG1837            | single   | #N/A     | -   | #N/A     | #N/A     |
| CG15221           | single   | #N/A     | -   | #N/A     | #N/A     |
| inaF-B            | single   | #N/A     | -   | #N/A     | #N/A     |
| inaF-D            | single   | #N/A     | -   | #N/A     | #N/A     |
| inaF-A            | single   | #N/A     | -   | #N/A     | #N/A     |
| inaF-C            | single   | #N/A     | -   | #N/A     | #N/A     |
| Karl              | #N/A     | single   | -   | #N/A     | #N/A     |
| CkIibeta          | #N/A     | single   | -   | #N/A     | single   |
| CG1840            | dense    | #N/A     | -   | #N/A     | single   |
| CG15738           | dense    | single   | -   | multiple | single   |
| wisp              | dense    | single   | -   | multiple | single   |
| CR32660           | single   | #N/A     | -   | #N/A     | #N/A     |
| Sclp              | single   | #N/A     | -   | #N/A     | #N/A     |
| cac               | multiple | single   | yes | #N/A     | #N/A     |
| gd                | single   | #N/A     | -   | #N/A     | #N/A     |
| tsg               | single   | #N/A     | -   | #N/A     | #N/A     |
| CG18130           | single   | #N/A     | -   | #N/A     | #N/A     |
| Ten-a             | multiple | dense    | yes | dense    | single   |
| Ir11a             | single   | #N/A     | -   | #N/A     | #N/A     |
| CG32651           | single   | #N/A     | -   | #N/A     | #N/A     |
| CG2574            | single   | #N/A     | -   | #N/A     | #N/A     |
| CG32652           | single   | #N/A     | -   | #N/A     | #N/A     |
| CG15730           | single   | #N/A     | -   | #N/A     | #N/A     |
| CG2556            | multiple | #N/A     | -   | #N/A     | #N/A     |
| snoRNA:Me18S-G894 | multiple | #N/A     | -   | #N/A     | #N/A     |
| CG11138           | single   | multiple | yes | multiple | multiple |
| LIMK1             | single   | #N/A     | -   | #N/A     | #N/A     |
| CG2543            | single   | #N/A     | -   | #N/A     | single   |
| CG11085           | single   | #N/A     | -   | #N/A     | single   |

|            |          |          |     |          |        |
|------------|----------|----------|-----|----------|--------|
| tomosyn    | multiple | single   | yes | #N/A     | #N/A   |
| Cklalpha   | multiple | single   | yes | #N/A     | #N/A   |
| Tis11      | multiple | multiple | yes | multiple | #N/A   |
| CR33963    | single   | single   | yes | single   | #N/A   |
| Smr        | multiple | dense    | yes | single   | dense  |
| CG4004     | dense    | multiple | yes | multiple | dense  |
| CG4661     | multiple | #N/A     | -   | #N/A     | #N/A   |
| CG4645     | single   | #N/A     | -   | #N/A     | #N/A   |
| fne        | multiple | single   | yes | single   | single |
| hep        | single   | multiple | yes | #N/A     | single |
| lic        | #N/A     | single   | -   | #N/A     | #N/A   |
| CG4351     | single   | #N/A     | -   | #N/A     | single |
| CG12714    | #N/A     | single   | -   | single   | #N/A   |
| CG42237    | #N/A     | single   | -   | #N/A     | #N/A   |
| CG32638    | single   | multiple | yes | #N/A     | #N/A   |
| snmRNA:204 | single   | multiple | yes | #N/A     | #N/A   |
| CG15717    | single   | multiple | yes | #N/A     | #N/A   |
| CG4330     | single   | multiple | yes | #N/A     | #N/A   |
| CG34411    | multiple | single   | yes | #N/A     | #N/A   |
| CG32640    | single   | #N/A     | -   | #N/A     | #N/A   |
| CG12723    | single   | #N/A     | -   | #N/A     | #N/A   |
| CG2453     | single   | #N/A     | -   | #N/A     | #N/A   |
| mew        | dense    | dense    | yes | single   | #N/A   |
| CG32639    | #N/A     | dense    | -   | #N/A     | #N/A   |
| CG15742    | single   | #N/A     | -   | #N/A     | #N/A   |
| comt       | multiple | #N/A     | -   | #N/A     | #N/A   |
| HDAC4      | multiple | single   | yes | #N/A     | #N/A   |
| CG15743    | single   | single   | no  | #N/A     | #N/A   |
| IP3K2      | single   | #N/A     | -   | #N/A     | #N/A   |
| Syt12      | single   | single   | no  | #N/A     | dense  |
| dmrt11E    | single   | single   | no  | single   | dense  |
| CG1640     | single   | single   | no  | #N/A     | dense  |
| CG1673     | multiple | #N/A     | -   | #N/A     | #N/A   |
| CG12725    | single   | #N/A     | -   | #N/A     | #N/A   |
| CG1681     | single   | #N/A     | -   | #N/A     | #N/A   |
| CG32635    | single   | #N/A     | -   | #N/A     | #N/A   |
| CG32633    | single   | #N/A     | -   | #N/A     | #N/A   |
| Tango13    | single   | #N/A     | -   | #N/A     | #N/A   |
| CG2691     | #N/A     | single   | -   | #N/A     | #N/A   |
| NFAT       | single   | single   | yes | single   | #N/A   |
| Lig4       | #N/A     | single   | -   | #N/A     | #N/A   |
| CG11164    | #N/A     | single   | -   | #N/A     | #N/A   |
| CG15760    | #N/A     | single   | -   | #N/A     | #N/A   |
| l(1)dd4    | single   | single   | no  | multiple | dense  |
| CG11134    | single   | single   | no  | #N/A     | dense  |
| CG11151    | single   | single   | no  | #N/A     | dense  |
| Yp3        | single   | #N/A     | -   | #N/A     | #N/A   |
| rdgB       | single   | #N/A     | -   | #N/A     | #N/A   |
| CG10992    | single   | #N/A     | -   | #N/A     | #N/A   |
| CG11103    | single   | #N/A     | -   | #N/A     | #N/A   |
| inaE       | single   | #N/A     | -   | #N/A     | single |
| CG11071    | single   | #N/A     | -   | #N/A     | #N/A   |
| ben        | multiple | single   | yes | #N/A     | #N/A   |

|           |          |          |     |        |          |
|-----------|----------|----------|-----|--------|----------|
| l(1)G0007 | single   | #N/A     | -   | #N/A   | #N/A     |
| l(1)G0469 | single   | #N/A     | -   | #N/A   | #N/A     |
| CG42271   | single   | multiple | yes | #N/A   | #N/A     |
| Fbxl4     | single   | multiple | yes | #N/A   | #N/A     |
| CG1434    | single   | single   | no  | #N/A   | #N/A     |
| dpr8      | multiple | #N/A     | -   | #N/A   | #N/A     |
| CG32601   | single   | #N/A     | -   | #N/A   | #N/A     |
| NetA      | multiple | single   | yes | single | single   |
| NetB      | single   | dense    | yes | single | #N/A     |
| CG14408   | single   | single   | no  | #N/A   | #N/A     |
| CG14411   | single   | single   | no  | #N/A   | #N/A     |
| eag       | single   | #N/A     | -   | #N/A   | #N/A     |
| hiw       | multiple | multiple | no  | single | single   |
| CG32594   | single   | multiple | yes | #N/A   | #N/A     |
| rab3-GEF  | single   | #N/A     | -   | #N/A   | #N/A     |
| drd       | multiple | single   | yes | #N/A   | #N/A     |
| Rpl37a    | single   | single   | no  | single | #N/A     |
| CG9095    | single   | single   | no  | single | #N/A     |
| CG15029   | single   | #N/A     | -   | #N/A   | single   |
| CG9101    | single   | #N/A     | -   | #N/A   | #N/A     |
| gce       | single   | #N/A     | -   | #N/A   | #N/A     |
| dah       | single   | single   | no  | #N/A   | #N/A     |
| CG9114    | single   | single   | no  | #N/A   | #N/A     |
| HDAC6     | single   | single   | no  | #N/A   | #N/A     |
| acj6      | #N/A     | single   | -   | #N/A   | #N/A     |
| shtd      | single   | single   | no  | #N/A   | #N/A     |
| CG6299    | single   | single   | no  | #N/A   | #N/A     |
| CG6294    | single   | single   | no  | #N/A   | #N/A     |
| CG15642   | #N/A     | single   | -   | #N/A   | #N/A     |
| CG6324    | single   | single   | no  | #N/A   | #N/A     |
| CG6340    | single   | single   | no  | single | #N/A     |
| Gmap      | #N/A     | single   | -   | #N/A   | #N/A     |
| CG42300   | single   | #N/A     | -   | #N/A   | #N/A     |
| CG9220    | #N/A     | single   | -   | #N/A   | #N/A     |
| sog       | dense    | dense    | no  | dense  | single   |
| CG8117    | single   | #N/A     | -   | #N/A   | #N/A     |
| CG8119    | dense    | dense    | yes | #N/A   | #N/A     |
| CG15646   | #N/A     | single   | -   | #N/A   | single   |
| CG12708   | #N/A     | single   | -   | #N/A   | single   |
| CG15599   | single   | #N/A     | -   | #N/A   | #N/A     |
| CG9281    | #N/A     | single   | -   | #N/A   | #N/A     |
| CG15601   | #N/A     | single   | -   | #N/A   | #N/A     |
| Graf      | single   | #N/A     | -   | #N/A   | #N/A     |
| CG8260    | single   | #N/A     | -   | #N/A   | #N/A     |
| mRpL3     | single   | #N/A     | -   | #N/A   | #N/A     |
| CG17209   | single   | #N/A     | -   | #N/A   | #N/A     |
| sd        | multiple | multiple | yes | single | multiple |
| CG8509    | #N/A     | single   | -   | #N/A   | single   |
| Chc       | single   | #N/A     | -   | #N/A   | #N/A     |
| CG8578    | single   | #N/A     | -   | #N/A   | #N/A     |
| sun       | single   | #N/A     | -   | #N/A   | #N/A     |
| UBL3      | single   | #N/A     | -   | #N/A   | #N/A     |
| MSBP      | single   | #N/A     | -   | #N/A   | #N/A     |

|                     |          |          |     |          |        |
|---------------------|----------|----------|-----|----------|--------|
| CG15916             | single   | #N/A     | -   | #N/A     | #N/A   |
| shi                 | multiple | #N/A     | -   | #N/A     | single |
| Stim                | single   | #N/A     | -   | #N/A     | #N/A   |
| CG8924              | single   | #N/A     | -   | #N/A     | #N/A   |
| CG12698             | dense    | #N/A     | -   | #N/A     | #N/A   |
| Muc14A              | dense    | #N/A     | -   | #N/A     | #N/A   |
| CG12395             | multiple | #N/A     | -   | #N/A     | #N/A   |
| CG42354             | single   | #N/A     | -   | #N/A     | single |
| CG42353             | single   | #N/A     | -   | #N/A     | single |
| disco-r             | #N/A     | multiple | -   | #N/A     | #N/A   |
| disco               | multiple | dense    | yes | #N/A     | #N/A   |
| snRNA:U5:14B        | #N/A     | single   | -   | #N/A     | #N/A   |
| CG32576             | single   | single   | no  | #N/A     | #N/A   |
| CG3560              | single   | single   | no  | #N/A     | #N/A   |
| caz                 | single   | single   | no  | #N/A     | #N/A   |
| CG9911              | single   | #N/A     | -   | #N/A     | #N/A   |
| CG3632              | single   | #N/A     | -   | #N/A     | #N/A   |
| CG9921              | single   | #N/A     | -   | #N/A     | #N/A   |
| Dsp1                | multiple | #N/A     | -   | #N/A     | #N/A   |
| nonA                | single   | #N/A     | -   | #N/A     | #N/A   |
| Anxb11              | single   | multiple | yes | dense    | #N/A   |
| hang                | single   | multiple | yes | dense    | #N/A   |
| para                | single   | #N/A     | -   | #N/A     | #N/A   |
| Arp14D              | #N/A     | single   | -   | #N/A     | #N/A   |
| rok                 | single   | #N/A     | -   | #N/A     | #N/A   |
| RpS19a              | multiple | #N/A     | -   | #N/A     | #N/A   |
| SmG                 | multiple | #N/A     | -   | dense    | #N/A   |
| mthl1               | multiple | single   | yes | #N/A     | #N/A   |
| CG32573             | single   | single   | yes | #N/A     | #N/A   |
| CG42512             | single   | single   | yes | #N/A     | #N/A   |
| CG9723              | single   | single   | yes | #N/A     | #N/A   |
| r                   | #N/A     | single   | -   | single   | #N/A   |
| CG13010             | #N/A     | single   | -   | #N/A     | #N/A   |
| sing                | #N/A     | single   | -   | #N/A     | #N/A   |
| Axs                 | #N/A     | single   | -   | #N/A     | #N/A   |
| 40790               | single   | #N/A     | -   | #N/A     | #N/A   |
| CG4678              | single   | #N/A     | -   | #N/A     | single |
| CG9634              | #N/A     | multiple | -   | #N/A     | #N/A   |
| if                  | multiple | multiple | yes | multiple | single |
| Sap30               | multiple | single   | yes | #N/A     | #N/A   |
| Rrp45               | multiple | single   | yes | #N/A     | #N/A   |
| CG4768              | multiple | single   | yes | single   | #N/A   |
| RhoGAP15B           | single   | #N/A     | -   | #N/A     | #N/A   |
| CG9086              | single   | #N/A     | -   | #N/A     | single |
| CG8949              | #N/A     | single   | -   | single   | dense  |
| CG4949              | #N/A     | single   | -   | #N/A     | dense  |
| CG8945              | #N/A     | single   | -   | #N/A     | dense  |
| CG5004              | multiple | single   | yes | #N/A     | single |
| mei-217             | single   | #N/A     | -   | single   | #N/A   |
| mei-218             | single   | #N/A     | -   | single   | #N/A   |
| RpS5a               | single   | single   | no  | #N/A     | #N/A   |
| snoRNA:Psi18S-1854c | single   | #N/A     | -   | #N/A     | #N/A   |
| snoRNA:Psi28S-1135f | single   | #N/A     | -   | #N/A     | #N/A   |



|                     |          |          |     |        |          |
|---------------------|----------|----------|-----|--------|----------|
| snoRNA:Psi18S-1854b | single   | #N/A     | -   | #N/A   | #N/A     |
| snoRNA:Psi28S-1135e | single   | #N/A     | -   | #N/A   | #N/A     |
| snoRNA:Psi18S-1854a | single   | #N/A     | -   | #N/A   | #N/A     |
| snoRNA:Psi28S-1135d | single   | single   | no  | #N/A   | #N/A     |
| snoRNA:Psi28S-1135c | single   | single   | no  | #N/A   | #N/A     |
| snoRNA:Psi28S-1135b | single   | single   | no  | #N/A   | #N/A     |
| snoRNA:Psi28S-1135a | single   | single   | no  | #N/A   | #N/A     |
| CG5010              | single   | single   | no  | #N/A   | #N/A     |
| xmas-1              | single   | single   | no  | #N/A   | #N/A     |
| xmas-2              | multiple | dense    | yes | #N/A   | #N/A     |
| baz                 | dense    | dense    | yes | single | #N/A     |
| f                   | single   | #N/A     | -   | #N/A   | #N/A     |
| CG8661              | single   | #N/A     | -   | #N/A   | #N/A     |
| Fim                 | multiple | #N/A     | -   | #N/A   | #N/A     |
| CG5445              | single   | #N/A     | -   | #N/A   | #N/A     |
| B-H2                | single   | dense    | yes | #N/A   | #N/A     |
| B-H1                | multiple | single   | yes | #N/A   | #N/A     |
| CG8557              | dense    | dense    | no  | dense  | single   |
| CG12432             | #N/A     | single   | -   | #N/A   | #N/A     |
| CG8408              | multiple | #N/A     | -   | #N/A   | #N/A     |
| CG8326              | single   | #N/A     | -   | #N/A   | #N/A     |
| CG8316              | single   | #N/A     | -   | #N/A   | #N/A     |
| RhoGApp190          | single   | multiple | yes | single | single   |
| CG8211              | single   | multiple | yes | single | #N/A     |
| CG8188              | single   | #N/A     | -   | single | #N/A     |
| par-6               | single   | #N/A     | -   | single | #N/A     |
| CG8173              | single   | dense    | yes | dense  | #N/A     |
| CG42684             | dense    | dense    | yes | dense  | single   |
| unc-4               | multiple | multiple | yes | #N/A   | #N/A     |
| CG12986             | multiple | #N/A     | -   | #N/A   | #N/A     |
| Socs16D             | multiple | single   | yes | dense  | #N/A     |
| CG6398              | multiple | single   | yes | dense  | multiple |
| CG6506              | #N/A     | single   | -   | #N/A   | #N/A     |
| CG32554             | #N/A     | single   | -   | #N/A   | #N/A     |
| CG32557             | #N/A     | single   | -   | #N/A   | #N/A     |
| CG6769              | single   | #N/A     | -   | #N/A   | #N/A     |
| mbn                 | multiple | #N/A     | -   | #N/A   | multiple |
| CG12985             | single   | #N/A     | -   | #N/A   | #N/A     |
| CG6788              | single   | #N/A     | -   | #N/A   | #N/A     |
| GS                  | single   | #N/A     | -   | #N/A   | #N/A     |
| CG6847              | single   | single   | yes | #N/A   | #N/A     |
| Sh                  | multiple | single   | yes | #N/A   | #N/A     |
| CG7192              | #N/A     | single   | -   | #N/A   | #N/A     |
| Taf8                | #N/A     | single   | -   | #N/A   | #N/A     |
| CG7135              | #N/A     | single   | -   | #N/A   | #N/A     |
| ari-1               | #N/A     | single   | -   | single | single   |
| Her                 | #N/A     | dense    | -   | #N/A   | #N/A     |
| Him                 | single   | dense    | yes | #N/A   | #N/A     |
| CG15059             | #N/A     | dense    | -   | single | #N/A     |
| upd3                | single   | dense    | yes | #N/A   | #N/A     |
| os                  | dense    | dense    | yes | #N/A   | #N/A     |
| CG6023              | dense    | #N/A     | -   | #N/A   | #N/A     |
| CrebB-17A           | #N/A     | single   | -   | single | #N/A     |

|            |          |          |     |          |          |
|------------|----------|----------|-----|----------|----------|
| CG15042    | #N/A     | single   | -   | #N/A     | #N/A     |
| CG15047    | #N/A     | single   | -   | #N/A     | #N/A     |
| Bx         | single   | multiple | yes | #N/A     | dense    |
| wgn        | dense    | dense    | yes | dense    | dense    |
| Rip11      | single   | dense    | yes | #N/A     | #N/A     |
| CG6540     | single   | #N/A     | -   | #N/A     | #N/A     |
| CG6617     | single   | #N/A     | -   | #N/A     | #N/A     |
| Ing3       | single   | #N/A     | -   | #N/A     | #N/A     |
| phm        | dense    | #N/A     | -   | #N/A     | #N/A     |
| Cyp18a1    | dense    | single   | yes | #N/A     | #N/A     |
| CCKLR-17D3 | #N/A     | single   | -   | #N/A     | #N/A     |
| CG6891     | single   | single   | no  | #N/A     | #N/A     |
| CG18259    | single   | #N/A     | -   | multiple | #N/A     |
| CG6900     | single   | #N/A     | -   | #N/A     | #N/A     |
| CG6961     | single   | #N/A     | -   | #N/A     | #N/A     |
| Pk17E      | single   | single   | no  | #N/A     | #N/A     |
| bnb        | single   | single   | no  | #N/A     | #N/A     |
| CG42450    | single   | #N/A     | -   | #N/A     | #N/A     |
| CG7101     | single   | #N/A     | -   | #N/A     | #N/A     |
| CG7326     | single   | dense    | yes | #N/A     | #N/A     |
| CG34401    | single   | dense    | yes | single   | #N/A     |
| CG7378     | multiple | single   | yes | #N/A     | #N/A     |
| CG32541    | multiple | multiple | no  | multiple | multiple |
| CG42506    | multiple | multiple | no  | multiple | multiple |
| RhoGAP18B  | multiple | multiple | no  | #N/A     | #N/A     |
| CG14195    | single   | #N/A     | -   | #N/A     | #N/A     |
| Mur18B     | single   | #N/A     | -   | #N/A     | #N/A     |
| Muc18B     | single   | #N/A     | -   | #N/A     | #N/A     |
| CG7884     | single   | single   | no  | single   | single   |
| CG8034     | #N/A     | multiple | -   | single   | #N/A     |
| CG8051     | single   | multiple | yes | #N/A     | #N/A     |
| snmRNA:763 | #N/A     | multiple | -   | #N/A     | #N/A     |
| out        | multiple | dense    | yes | single   | single   |
| kek5       | #N/A     | multiple | -   | single   | single   |
| CG12203    | #N/A     | single   | -   | #N/A     | #N/A     |
| CG12204    | #N/A     | single   | -   | #N/A     | #N/A     |
| CG14199    | #N/A     | single   | -   | #N/A     | #N/A     |
| Pfrx       | single   | multiple | yes | #N/A     | #N/A     |
| CoRest     | single   | single   | no  | #N/A     | single   |
| CG12231    | single   | single   | no  | #N/A     | #N/A     |
| CG32532    | single   | single   | no  | #N/A     | #N/A     |
| Tao-1      | #N/A     | single   | -   | #N/A     | #N/A     |
| CG14218    | #N/A     | single   | -   | #N/A     | #N/A     |
| CG14205    | single   | single   | no  | #N/A     | #N/A     |
| RpS10b     | single   | single   | no  | #N/A     | #N/A     |
| CG14220    | single   | single   | no  | #N/A     | #N/A     |
| e(y)3      | single   | #N/A     | -   | single   | #N/A     |
| CG14213    | single   | #N/A     | -   | single   | #N/A     |
| CG12237    | single   | #N/A     | -   | #N/A     | #N/A     |
| dome       | single   | single   | no  | single   | #N/A     |
| Ubqn       | single   | single   | no  | single   | #N/A     |
| meso18E    | #N/A     | single   | -   | #N/A     | single   |
| CG12531    | single   | multiple | yes | #N/A     | single   |

|                     |          |          |     |        |        |
|---------------------|----------|----------|-----|--------|--------|
| CG14235             | single   | single   | no  | single | #N/A   |
| CG18809             | single   | single   | no  | single | #N/A   |
| CG33932             | single   | single   | no  | single | #N/A   |
| Rpp20               | single   | single   | no  | single | #N/A   |
| CG32528             | single   | multiple | yes | #N/A   | single |
| Alr                 | #N/A     | single   | -   | single | single |
| CG12703             | single   | multiple | yes | single | single |
| CG12702             | multiple | multiple | yes | #N/A   | #N/A   |
| vfl                 | dense    | dense    | yes | #N/A   | single |
| jog                 | multiple | dense    | yes | dense  | #N/A   |
| CG11943             | single   | dense    | yes | dense  | single |
| CG32529             | single   | multiple | yes | single | #N/A   |
| amn                 | single   | multiple | yes | single | #N/A   |
| CG17068             | #N/A     | multiple | -   | #N/A   | #N/A   |
| Rab10               | single   | multiple | yes | #N/A   | #N/A   |
| CG17065             | single   | multiple | yes | #N/A   | #N/A   |
| CG42577             | single   | #N/A     | -   | #N/A   | #N/A   |
| CG1631              | multiple | multiple | no  | #N/A   | #N/A   |
| RhoGAP19D           | single   | #N/A     | -   | #N/A   | #N/A   |
| CG15461             | single   | #N/A     | -   | #N/A   | #N/A   |
| CG1812              | #N/A     | single   | -   | single | #N/A   |
| RunxA               | single   | dense    | yes | #N/A   | #N/A   |
| Cyp6v1              | multiple | dense    | yes | #N/A   | single |
| CG1835              | #N/A     | single   | -   | #N/A   | #N/A   |
| hydra               | multiple | #N/A     | -   | #N/A   | #N/A   |
| run                 | dense    | multiple | yes | #N/A   | #N/A   |
| CG1324              | multiple | dense    | yes | #N/A   | #N/A   |
| CG15452             | #N/A     | multiple | -   | #N/A   | single |
| shakB               | multiple | single   | yes | #N/A   | #N/A   |
| CG1518              | dense    | dense    | yes | #N/A   | #N/A   |
| snoRNA:Me28S-U3344b | dense    | dense    | yes | #N/A   | #N/A   |
| snoRNA:MeU2-C28     | dense    | dense    | yes | #N/A   | #N/A   |
| snoRNA:Me28S-U3344a | dense    | dense    | yes | #N/A   | #N/A   |
| bves                | dense    | dense    | yes | single | dense  |
| CG32512             | single   | dense    | yes | #N/A   | dense  |
| CG32521             | multiple | #N/A     | -   | #N/A   | #N/A   |
| CG14581             | single   | #N/A     | -   | #N/A   | #N/A   |
| l(1)G0269           | single   | single   | no  | #N/A   | #N/A   |
| CG1486              | single   | single   | no  | #N/A   | #N/A   |
| flil                | single   | #N/A     | -   | #N/A   | #N/A   |
| dod                 | single   | #N/A     | -   | #N/A   | #N/A   |
| pen                 | single   | #N/A     | -   | #N/A   | #N/A   |
| slgA                | #N/A     | single   | -   | #N/A   | #N/A   |
| CG14621             | single   | #N/A     | -   | #N/A   | #N/A   |
| CG17600             | single   | single   | no  | #N/A   | dense  |
| S6kII               | single   | single   | no  | #N/A   | dense  |
| CG12446             | single   | #N/A     | -   | #N/A   | #N/A   |
| fog                 | single   | multiple | yes | #N/A   | single |
| stnA                | multiple | #N/A     | -   | #N/A   | #N/A   |
| stnB                | multiple | #N/A     | -   | #N/A   | #N/A   |
| CR32011             | single   | #N/A     | -   | #N/A   | #N/A   |
| CR32010             | multiple | #N/A     | -   | #N/A   | #N/A   |
| CR32009             | single   | #N/A     | -   | #N/A   | #N/A   |

|            |          |          |     |        |        |
|------------|----------|----------|-----|--------|--------|
| plexB      | multiple | #N/A     | -   | #N/A   | #N/A   |
| ci         | multiple | #N/A     | -   | #N/A   | #N/A   |
| RpS3A      | multiple | #N/A     | -   | #N/A   | #N/A   |
| pan        | multiple | #N/A     | -   | #N/A   | #N/A   |
| CG2219     | single   | #N/A     | -   | #N/A   | #N/A   |
| CG31998    | single   | #N/A     | -   | #N/A   | #N/A   |
| dpr7       | single   | #N/A     | -   | #N/A   | #N/A   |
| RhoGAP102A | single   | #N/A     | -   | #N/A   | #N/A   |
| Nfl        | multiple | #N/A     | -   | #N/A   | #N/A   |
| Syt7       | multiple | #N/A     | -   | #N/A   | #N/A   |
| Rad23      | single   | #N/A     | -   | #N/A   | #N/A   |
| CG2177     | single   | #N/A     | -   | #N/A   | #N/A   |
| PMCA       | single   | #N/A     | -   | #N/A   | #N/A   |
| Hcf        | #N/A     | single   | -   | #N/A   | #N/A   |
| CG2052     | #N/A     | multiple | -   | #N/A   | #N/A   |
| lgs        | single   | #N/A     | -   | #N/A   | #N/A   |
| CaMKI      | single   | #N/A     | -   | #N/A   | #N/A   |
| zfh2       | single   | dense    | yes | #N/A   | #N/A   |
| Thd1       | single   | #N/A     | -   | #N/A   | #N/A   |
| mav        | #N/A     | single   | -   | #N/A   | #N/A   |
| CG1732     | single   | #N/A     | -   | #N/A   | #N/A   |
| CG9935     | single   | #N/A     | -   | #N/A   | #N/A   |
| gw         | multiple | #N/A     | -   | #N/A   | #N/A   |
| Slip1      | single   | #N/A     | -   | #N/A   | #N/A   |
| ey         | single   | multiple | yes | #N/A   | #N/A   |
| bt         | multiple | single   | yes | #N/A   | #N/A   |
| MED26      | single   | #N/A     | -   | #N/A   | #N/A   |
| CG11231    | #N/A     | single   | -   | #N/A   | #N/A   |
| Sox102F    | multiple | multiple | yes | #N/A   | #N/A   |
| unc-13     | single   | #N/A     | -   | #N/A   | #N/A   |
| CG11093    | #N/A     | single   | -   | #N/A   | #N/A   |
| sphinx     | #N/A     | single   | -   | #N/A   | #N/A   |
| toy        | single   | #N/A     | -   | #N/A   | #N/A   |
| plexA      | multiple | #N/A     | -   | #N/A   | #N/A   |
| CG11077    | single   | #N/A     | -   | #N/A   | #N/A   |
| CG11076    | single   | #N/A     | -   | #N/A   | #N/A   |
| Actbeta    | single   | #N/A     | -   | #N/A   | #N/A   |
| sv         | single   | #N/A     | -   | #N/A   | #N/A   |
| cals       | multiple | #N/A     | -   | #N/A   | #N/A   |
| CG33521    | multiple | #N/A     | -   | #N/A   | #N/A   |
| CG17471    | multiple | #N/A     | -   | #N/A   | #N/A   |
| M(2)21AB   | #N/A     | #N/A     | -   | single | #N/A   |
| CG11592    | #N/A     | #N/A     | -   | #N/A   | dense  |
| CG4213     | #N/A     | #N/A     | -   | #N/A   | single |
| Ets21C     | #N/A     | #N/A     | -   | #N/A   | dense  |
| GluRIIC    | #N/A     | #N/A     | -   | #N/A   | dense  |
| CG4341     | #N/A     | #N/A     | -   | #N/A   | dense  |
| CG4629     | #N/A     | #N/A     | -   | #N/A   | dense  |
| mtRNApol   | #N/A     | #N/A     | -   | #N/A   | single |
| CG4726     | #N/A     | #N/A     | -   | single | #N/A   |
| capt       | #N/A     | #N/A     | -   | #N/A   | single |
| Tango14    | #N/A     | #N/A     | -   | #N/A   | single |
| dpr3       | #N/A     | #N/A     | -   | single | single |

|             |      |      |   |        |        |
|-------------|------|------|---|--------|--------|
| CG12674     | #N/A | #N/A | - | single | #N/A   |
| GlyP        | #N/A | #N/A | - | single | #N/A   |
| tho2        | #N/A | #N/A | - | single | dense  |
| CG11723     | #N/A | #N/A | - | single | dense  |
| CG7261      | #N/A | #N/A | - | single | dense  |
| AIF         | #N/A | #N/A | - | #N/A   | dense  |
| CG15382     | #N/A | #N/A | - | #N/A   | dense  |
| CG15387     | #N/A | #N/A | - | single | #N/A   |
| l(2)s5379   | #N/A | #N/A | - | single | #N/A   |
| Rab5        | #N/A | #N/A | - | #N/A   | dense  |
| Drp1        | #N/A | #N/A | - | single | #N/A   |
| Or23a       | #N/A | #N/A | - | single | #N/A   |
| Prosbeta4R2 | #N/A | #N/A | - | single | #N/A   |
| CG31694     | #N/A | #N/A | - | #N/A   | dense  |
| CG8813      | #N/A | #N/A | - | #N/A   | dense  |
| gkt         | #N/A | #N/A | - | #N/A   | dense  |
| CG31953     | #N/A | #N/A | - | #N/A   | dense  |
| Hydr2       | #N/A | #N/A | - | single | dense  |
| CG3921      | #N/A | #N/A | - | single | #N/A   |
| CG31961     | #N/A | #N/A | - | single | #N/A   |
| CG3338      | #N/A | #N/A | - | single | dense  |
| Psf2        | #N/A | #N/A | - | single | #N/A   |
| CG11929     | #N/A | #N/A | - | #N/A   | single |
| CG2976      | #N/A | #N/A | - | #N/A   | dense  |
| pog         | #N/A | #N/A | - | #N/A   | dense  |
| CG2837      | #N/A | #N/A | - | #N/A   | single |
| His3.3A     | #N/A | #N/A | - | #N/A   | single |
| CG31918     | #N/A | #N/A | - | #N/A   | single |
| Rpn11       | #N/A | #N/A | - | #N/A   | single |
| TpnC25D     | #N/A | #N/A | - | single | #N/A   |
| vri         | #N/A | #N/A | - | single | #N/A   |
| CG31646     | #N/A | #N/A | - | #N/A   | single |
| CG7236      | #N/A | #N/A | - | #N/A   | dense  |
| CG14007     | #N/A | #N/A | - | #N/A   | dense  |
| CG34011     | #N/A | #N/A | - | #N/A   | dense  |
| CG11149     | #N/A | #N/A | - | #N/A   | dense  |
| CG9171      | #N/A | #N/A | - | #N/A   | dense  |
| CG14005     | #N/A | #N/A | - | #N/A   | single |
| CG7239      | #N/A | #N/A | - | #N/A   | single |
| CG34381     | #N/A | #N/A | - | #N/A   | single |
| CG9109      | #N/A | #N/A | - | #N/A   | dense  |
| mtm         | #N/A | #N/A | - | #N/A   | dense  |
| CG9117      | #N/A | #N/A | - | #N/A   | dense  |
| CG31643     | #N/A | #N/A | - | #N/A   | dense  |
| Kr-h2       | #N/A | #N/A | - | single | #N/A   |
| CG9175      | #N/A | #N/A | - | #N/A   | dense  |
| CG9497      | #N/A | #N/A | - | #N/A   | dense  |
| Sec61alpha  | #N/A | #N/A | - | dense  | single |
| Oatp26F     | #N/A | #N/A | - | #N/A   | single |
| Tango1      | #N/A | #N/A | - | #N/A   | single |
| CG31633     | #N/A | #N/A | - | #N/A   | single |
| CG31636     | #N/A | #N/A | - | #N/A   | single |
| CG11070     | #N/A | #N/A | - | #N/A   | single |

|              |      |      |   |          |        |
|--------------|------|------|---|----------|--------|
| homer        | #N/A | #N/A | - | single   | #N/A   |
| Liprin-alpha | #N/A | #N/A | - | single   | #N/A   |
| nrv1         | #N/A | #N/A | - | single   | #N/A   |
| Rab30        | #N/A | #N/A | - | #N/A     | single |
| Mnn1         | #N/A | #N/A | - | single   | dense  |
| CG4502       | #N/A | #N/A | - | #N/A     | single |
| CG5177       | #N/A | #N/A | - | #N/A     | single |
| CG5181       | #N/A | #N/A | - | #N/A     | single |
| CG15818      | #N/A | #N/A | - | #N/A     | single |
| CG5261       | #N/A | #N/A | - | #N/A     | single |
| CG5958       | #N/A | #N/A | - | #N/A     | single |
| CG42533      | #N/A | #N/A | - | multiple | dense  |
| CG33296      | #N/A | #N/A | - | single   | #N/A   |
| CG13793      | #N/A | #N/A | - | single   | #N/A   |
| CG18591      | #N/A | #N/A | - | single   | #N/A   |
| CG7231       | #N/A | #N/A | - | #N/A     | dense  |
| CG7224       | #N/A | #N/A | - | single   | #N/A   |
| Wwox         | #N/A | #N/A | - | single   | #N/A   |
| poe          | #N/A | #N/A | - | single   | #N/A   |
| Mcr          | #N/A | #N/A | - | single   | #N/A   |
| Bsg          | #N/A | #N/A | - | single   | #N/A   |
| CG8683       | #N/A | #N/A | - | #N/A     | dense  |
| CG31607      | #N/A | #N/A | - | single   | dense  |
| CG31900      | #N/A | #N/A | - | #N/A     | dense  |
| CG8419       | #N/A | #N/A | - | dense    | #N/A   |
| Su(var)205   | #N/A | #N/A | - | dense    | #N/A   |
| Ssb-c31a     | #N/A | #N/A | - | dense    | #N/A   |
| CG8349       | #N/A | #N/A | - | #N/A     | single |
| CG8292       | #N/A | #N/A | - | #N/A     | single |
| Snx6         | #N/A | #N/A | - | #N/A     | single |
| Pvr          | #N/A | #N/A | - | #N/A     | single |
| wol          | #N/A | #N/A | - | multiple | #N/A   |
| Scgalpha     | #N/A | #N/A | - | single   | #N/A   |
| CG7840       | #N/A | #N/A | - | single   | #N/A   |
| CG7781       | #N/A | #N/A | - | single   | #N/A   |
| CG7627       | #N/A | #N/A | - | single   | #N/A   |
| grk          | #N/A | #N/A | - | #N/A     | dense  |
| fu2          | #N/A | #N/A | - | single   | #N/A   |
| CheA29a      | #N/A | #N/A | - | single   | #N/A   |
| CG9314       | #N/A | #N/A | - | #N/A     | single |
| raw          | #N/A | #N/A | - | #N/A     | dense  |
| Toll-4       | #N/A | #N/A | - | #N/A     | single |
| Cks30A       | #N/A | #N/A | - | single   | #N/A   |
| CG3838       | #N/A | #N/A | - | single   | dense  |
| CG4389       | #N/A | #N/A | - | #N/A     | dense  |
| CG4364       | #N/A | #N/A | - | single   | #N/A   |
| zf30C        | #N/A | #N/A | - | #N/A     | dense  |
| Taf11        | #N/A | #N/A | - | #N/A     | dense  |
| und          | #N/A | #N/A | - | #N/A     | dense  |
| Apf          | #N/A | #N/A | - | single   | #N/A   |
| Trp1         | #N/A | #N/A | - | single   | #N/A   |
| CG31714      | #N/A | #N/A | - | #N/A     | single |
| CG13133      | #N/A | #N/A | - | #N/A     | single |

|                |      |      |   |        |          |
|----------------|------|------|---|--------|----------|
| chico          | #N/A | #N/A | - | #N/A   | single   |
| bsk            | #N/A | #N/A | - | #N/A   | single   |
| CG31717        | #N/A | #N/A | - | #N/A   | single   |
| CG5367         | #N/A | #N/A | - | single | #N/A     |
| CG5045         | #N/A | #N/A | - | single | #N/A     |
| dpr19          | #N/A | #N/A | - | single | #N/A     |
| CG5091         | #N/A | #N/A | - | single | #N/A     |
| CG31716        | #N/A | #N/A | - | single | #N/A     |
| RpS27A         | #N/A | #N/A | - | single | #N/A     |
| lp259          | #N/A | #N/A | - | single | #N/A     |
| CG5188         | #N/A | #N/A | - | single | #N/A     |
| CG5343         | #N/A | #N/A | - | single | #N/A     |
| CG5198         | #N/A | #N/A | - | single | #N/A     |
| CG6495         | #N/A | #N/A | - | #N/A   | dense    |
| dpr2           | #N/A | #N/A | - | single | dense    |
| CG14072        | #N/A | #N/A | - | single | #N/A     |
| CG33129        | #N/A | #N/A | - | single | dense    |
| lectin-33A     | #N/A | #N/A | - | #N/A   | single   |
| Rpl9           | #N/A | #N/A | - | #N/A   | single   |
| Nup154         | #N/A | #N/A | - | dense  | single   |
| Samuel         | #N/A | #N/A | - | single | #N/A     |
| Ge-1           | #N/A | #N/A | - | single | #N/A     |
| cmet           | #N/A | #N/A | - | single | #N/A     |
| crol           | #N/A | #N/A | - | single | #N/A     |
| esc            | #N/A | #N/A | - | #N/A   | dense    |
| Mt2            | #N/A | #N/A | - | single | #N/A     |
| Ced-12         | #N/A | #N/A | - | #N/A   | dense    |
| Patsas         | #N/A | #N/A | - | #N/A   | dense    |
| Aats-thr       | #N/A | #N/A | - | #N/A   | dense    |
| Rab6           | #N/A | #N/A | - | #N/A   | dense    |
| CG16996        | #N/A | #N/A | - | #N/A   | dense    |
| CG16997        | #N/A | #N/A | - | #N/A   | dense    |
| vir-1          | #N/A | #N/A | - | #N/A   | single   |
| CG6405         | #N/A | #N/A | - | single | #N/A     |
| CG17024        | #N/A | #N/A | - | #N/A   | single   |
| CG5792         | #N/A | #N/A | - | single | #N/A     |
| MRP            | #N/A | #N/A | - | single | multiple |
| CG12404        | #N/A | #N/A | - | #N/A   | single   |
| Vha68-1        | #N/A | #N/A | - | #N/A   | single   |
| CG16974        | #N/A | #N/A | - | single | #N/A     |
| Edem2          | #N/A | #N/A | - | single | #N/A     |
| snRNA:U2:34ABc | #N/A | #N/A | - | #N/A   | dense    |
| CG5705         | #N/A | #N/A | - | #N/A   | dense    |
| CG5945         | #N/A | #N/A | - | single | single   |
| snRNA:U5:34A   | #N/A | #N/A | - | #N/A   | single   |
| CG16820        | #N/A | #N/A | - | #N/A   | single   |
| Tap42          | #N/A | #N/A | - | #N/A   | dense    |
| CG31855        | #N/A | #N/A | - | #N/A   | dense    |
| CG9306         | #N/A | #N/A | - | #N/A   | dense    |
| CG9267         | #N/A | #N/A | - | single | #N/A     |
| ics            | #N/A | #N/A | - | #N/A   | single   |
| CG18125        | #N/A | #N/A | - | #N/A   | single   |
| mTTF           | #N/A | #N/A | - | #N/A   | single   |

|             |      |      |   |          |        |
|-------------|------|------|---|----------|--------|
| I(2)34Fc    | #N/A | #N/A | - | #N/A     | single |
| pburs       | #N/A | #N/A | - | single   | #N/A   |
| dyn-p25     | #N/A | #N/A | - | #N/A     | dense  |
| I(2)35Be    | #N/A | #N/A | - | #N/A     | dense  |
| NC2beta     | #N/A | #N/A | - | #N/A     | dense  |
| I(2)35Bc    | #N/A | #N/A | - | #N/A     | dense  |
| I(2)35Bd    | #N/A | #N/A | - | #N/A     | dense  |
| I(2)35Bg    | #N/A | #N/A | - | single   | #N/A   |
| Su(H)       | #N/A | #N/A | - | single   | #N/A   |
| ck          | #N/A | #N/A | - | single   | #N/A   |
| vas         | #N/A | #N/A | - | #N/A     | dense  |
| vig         | #N/A | #N/A | - | #N/A     | dense  |
| CG33678     | #N/A | #N/A | - | #N/A     | dense  |
| CG15267     | #N/A | #N/A | - | #N/A     | dense  |
| CG3975      | #N/A | #N/A | - | #N/A     | dense  |
| I(2)35Cc    | #N/A | #N/A | - | #N/A     | dense  |
| yuri        | #N/A | #N/A | - | single   | dense  |
| wek         | #N/A | #N/A | - | #N/A     | dense  |
| Ku80        | #N/A | #N/A | - | #N/A     | dense  |
| CG31826     | #N/A | #N/A | - | #N/A     | dense  |
| twe         | #N/A | #N/A | - | #N/A     | dense  |
| CG5861      | #N/A | #N/A | - | #N/A     | single |
| CG42266     | #N/A | #N/A | - | single   | #N/A   |
| grp         | #N/A | #N/A | - | multiple | single |
| squ         | #N/A | #N/A | - | single   | single |
| CG31807     | #N/A | #N/A | - | #N/A     | single |
| CG33552     | #N/A | #N/A | - | #N/A     | single |
| CG31782     | #N/A | #N/A | - | single   | #N/A   |
| Cyt-c-p     | #N/A | #N/A | - | single   | #N/A   |
| CG31812     | #N/A | #N/A | - | single   | #N/A   |
| CG17996     | #N/A | #N/A | - | single   | #N/A   |
| CG17331     | #N/A | #N/A | - | single   | #N/A   |
| CG13278     | #N/A | #N/A | - | single   | #N/A   |
| CG5783      | #N/A | #N/A | - | single   | single |
| CG7200      | #N/A | #N/A | - | single   | single |
| CG42750     | #N/A | #N/A | - | #N/A     | single |
| Acp36DE     | #N/A | #N/A | - | single   | #N/A   |
| CG31790     | #N/A | #N/A | - | single   | #N/A   |
| CG42627     | #N/A | #N/A | - | single   | #N/A   |
| Mst36Fa     | #N/A | #N/A | - | single   | #N/A   |
| CG31751     | #N/A | #N/A | - | single   | #N/A   |
| CG10383     | #N/A | #N/A | - | single   | #N/A   |
| CG10338     | #N/A | #N/A | - | single   | #N/A   |
| CG10600     | #N/A | #N/A | - | #N/A     | dense  |
| CG31752     | #N/A | #N/A | - | #N/A     | dense  |
| CG33120     | #N/A | #N/A | - | dense    | dense  |
| CG17321     | #N/A | #N/A | - | dense    | #N/A   |
| CG42848     | #N/A | #N/A | - | #N/A     | single |
| CG10470     | #N/A | #N/A | - | #N/A     | dense  |
| I(2)37Bb    | #N/A | #N/A | - | #N/A     | dense  |
| Rpn3        | #N/A | #N/A | - | #N/A     | dense  |
| CG17567     | #N/A | #N/A | - | #N/A     | dense  |
| gammaTub37C | #N/A | #N/A | - | #N/A     | dense  |



|                |      |      |   |          |          |
|----------------|------|------|---|----------|----------|
| pigeon         | #N/A | #N/A | - | dense    | dense    |
| CG13086        | #N/A | #N/A | - | #N/A     | single   |
| CG17544        | #N/A | #N/A | - | single   | #N/A     |
| CG31798        | #N/A | #N/A | - | single   | #N/A     |
| CG9987         | #N/A | #N/A | - | #N/A     | dense    |
| Rab9           | #N/A | #N/A | - | #N/A     | dense    |
| CG10237        | #N/A | #N/A | - | #N/A     | dense    |
| CG13077        | #N/A | #N/A | - | dense    | #N/A     |
| Lar            | #N/A | #N/A | - | single   | #N/A     |
| snRNA:U2:38Aba | #N/A | #N/A | - | #N/A     | dense    |
| CG10481        | #N/A | #N/A | - | #N/A     | single   |
| mRpS18B        | #N/A | #N/A | - | #N/A     | dense    |
| Kua            | #N/A | #N/A | - | #N/A     | dense    |
| CG13970        | #N/A | #N/A | - | #N/A     | dense    |
| CG10949        | #N/A | #N/A | - | single   | #N/A     |
| Arc-p34        | #N/A | #N/A | - | single   | #N/A     |
| CG31688        | #N/A | #N/A | - | single   | #N/A     |
| CG1962         | #N/A | #N/A | - | single   | #N/A     |
| CG9323         | #N/A | #N/A | - | single   | #N/A     |
| Pomp           | #N/A | #N/A | - | single   | #N/A     |
| CG33322        | #N/A | #N/A | - | single   | #N/A     |
| E2f2           | #N/A | #N/A | - | single   | #N/A     |
| CG2225         | #N/A | #N/A | - | multiple | #N/A     |
| Ef2b           | #N/A | #N/A | - | dense    | #N/A     |
| CG1416         | #N/A | #N/A | - | single   | #N/A     |
| CG42748        | #N/A | #N/A | - | #N/A     | dense    |
| CG3262         | #N/A | #N/A | - | single   | #N/A     |
| RpL5           | #N/A | #N/A | - | single   | #N/A     |
| cta            | #N/A | #N/A | - | single   | #N/A     |
| gus            | #N/A | #N/A | - | single   | #N/A     |
| l(2)NC136      | #N/A | #N/A | - | dense    | #N/A     |
| dpr12          | #N/A | #N/A | - | single   | #N/A     |
| CG7861         | #N/A | #N/A | - | single   | #N/A     |
| CG33919        | #N/A | #N/A | - | #N/A     | single   |
| CG9422         | #N/A | #N/A | - | #N/A     | dense    |
| CG3270         | #N/A | #N/A | - | #N/A     | dense    |
| Mob4           | #N/A | #N/A | - | #N/A     | dense    |
| Rab2           | #N/A | #N/A | - | #N/A     | dense    |
| ZIP1           | #N/A | #N/A | - | #N/A     | dense    |
| CG9430         | #N/A | #N/A | - | #N/A     | dense    |
| CG3420         | #N/A | #N/A | - | single   | #N/A     |
| CG9436         | #N/A | #N/A | - | single   | #N/A     |
| CG33558        | #N/A | #N/A | - | multiple | #N/A     |
| Cyp6u1         | #N/A | #N/A | - | single   | #N/A     |
| Tsp42Eh        | #N/A | #N/A | - | single   | #N/A     |
| Tsp42Ei        | #N/A | #N/A | - | single   | #N/A     |
| CG12835        | #N/A | #N/A | - | single   | single   |
| pk             | #N/A | #N/A | - | multiple | multiple |
| CG30384        | #N/A | #N/A | - | #N/A     | single   |
| Incenp         | #N/A | #N/A | - | #N/A     | single   |
| CG30502        | #N/A | #N/A | - | single   | #N/A     |
| CG1603         | #N/A | #N/A | - | single   | #N/A     |
| CG1602         | #N/A | #N/A | - | single   | #N/A     |

|             |      |      |   |          |          |
|-------------|------|------|---|----------|----------|
| CG1600      | #N/A | #N/A | - | single   | single   |
| Cyt-b5      | #N/A | #N/A | - | #N/A     | single   |
| CG2137      | #N/A | #N/A | - | #N/A     | single   |
| boca        | #N/A | #N/A | - | single   | #N/A     |
| Vps13       | #N/A | #N/A | - | single   | #N/A     |
| CG1399      | #N/A | #N/A | - | single   | single   |
| CG1553      | #N/A | #N/A | - | #N/A     | dense    |
| sax         | #N/A | #N/A | - | #N/A     | dense    |
| CG1550      | #N/A | #N/A | - | #N/A     | dense    |
| CG2906      | #N/A | #N/A | - | single   | #N/A     |
| sut1        | #N/A | #N/A | - | single   | #N/A     |
| Cul-4       | #N/A | #N/A | - | single   | #N/A     |
| CG18316     | #N/A | #N/A | - | single   | #N/A     |
| CG2183      | #N/A | #N/A | - | #N/A     | single   |
| Mlh1        | #N/A | #N/A | - | #N/A     | single   |
| CG14757     | #N/A | #N/A | - | single   | single   |
| LRP1        | #N/A | #N/A | - | #N/A     | single   |
| CG14752     | #N/A | #N/A | - | #N/A     | single   |
| stmA        | #N/A | #N/A | - | #N/A     | single   |
| CG8740      | #N/A | #N/A | - | #N/A     | single   |
| CG42615     | #N/A | #N/A | - | #N/A     | single   |
| CG13745     | #N/A | #N/A | - | single   | #N/A     |
| CG8229      | #N/A | #N/A | - | single   | #N/A     |
| CG33199     | #N/A | #N/A | - | single   | #N/A     |
| Tom7        | #N/A | #N/A | - | single   | #N/A     |
| CG8213      | #N/A | #N/A | - | #N/A     | single   |
| CG13744     | #N/A | #N/A | - | #N/A     | single   |
| CG13747     | #N/A | #N/A | - | #N/A     | single   |
| CG8170      | #N/A | #N/A | - | #N/A     | single   |
| CG11778     | #N/A | #N/A | - | single   | #N/A     |
| CG13742     | #N/A | #N/A | - | single   | #N/A     |
| Vang        | #N/A | #N/A | - | single   | #N/A     |
| Pmm45A      | #N/A | #N/A | - | single   | #N/A     |
| Su(var)2-10 | #N/A | #N/A | - | #N/A     | dense    |
| CG11784     | #N/A | #N/A | - | #N/A     | dense    |
| CG18659     | #N/A | #N/A | - | #N/A     | dense    |
| Pkn         | #N/A | #N/A | - | single   | multiple |
| CG34141     | #N/A | #N/A | - | #N/A     | single   |
| CG2063      | #N/A | #N/A | - | single   | single   |
| CG1968      | #N/A | #N/A | - | single   | #N/A     |
| Drep-2      | #N/A | #N/A | - | #N/A     | single   |
| Myd88       | #N/A | #N/A | - | #N/A     | dense    |
| CG13954     | #N/A | #N/A | - | #N/A     | single   |
| l(2)03659   | #N/A | #N/A | - | #N/A     | dense    |
| CG8801      | #N/A | #N/A | - | dense    | #N/A     |
| CG13955     | #N/A | #N/A | - | single   | #N/A     |
| prel        | #N/A | #N/A | - | single   | #N/A     |
| brp         | #N/A | #N/A | - | #N/A     | single   |
| gem         | #N/A | #N/A | - | multiple | #N/A     |
| CG18011     | #N/A | #N/A | - | single   | #N/A     |
| KCNQ        | #N/A | #N/A | - | single   | #N/A     |
| CG12909     | #N/A | #N/A | - | #N/A     | single   |
| Obp46a      | #N/A | #N/A | - | #N/A     | single   |

|            |      |      |   |          |          |
|------------|------|------|---|----------|----------|
| CG12895    | #N/A | #N/A | - | #N/A     | dense    |
| G-alpha47A | #N/A | #N/A | - | single   | dense    |
| Cyp49a1    | #N/A | #N/A | - | single   | #N/A     |
| Prosbeta5  | #N/A | #N/A | - | single   | #N/A     |
| Lsm10      | #N/A | #N/A | - | single   | #N/A     |
| CG12325    | #N/A | #N/A | - | dense    | #N/A     |
| BBS4       | #N/A | #N/A | - | single   | #N/A     |
| CG9084     | #N/A | #N/A | - | #N/A     | single   |
| Syx6       | #N/A | #N/A | - | #N/A     | single   |
| Cpr47Eg    | #N/A | #N/A | - | single   | #N/A     |
| CG18336    | #N/A | #N/A | - | #N/A     | dense    |
| CG42336    | #N/A | #N/A | - | single   | dense    |
| CG30025    | #N/A | #N/A | - | #N/A     | single   |
| CG34228    | #N/A | #N/A | - | dense    | #N/A     |
| Roc2       | #N/A | #N/A | - | dense    | #N/A     |
| Buffy      | #N/A | #N/A | - | #N/A     | single   |
| wal        | #N/A | #N/A | - | #N/A     | single   |
| CG13197    | #N/A | #N/A | - | #N/A     | single   |
| Ir48b      | #N/A | #N/A | - | #N/A     | single   |
| CG8290     | #N/A | #N/A | - | single   | #N/A     |
| CG30036    | #N/A | #N/A | - | single   | #N/A     |
| CG8321     | #N/A | #N/A | - | #N/A     | dense    |
| 128up      | #N/A | #N/A | - | dense    | #N/A     |
| RpIII128   | #N/A | #N/A | - | dense    | #N/A     |
| CG30039    | #N/A | #N/A | - | #N/A     | single   |
| Drep-3     | #N/A | #N/A | - | #N/A     | single   |
| CG8520     | #N/A | #N/A | - | single   | #N/A     |
| CG8545     | #N/A | #N/A | - | single   | #N/A     |
| CG8550     | #N/A | #N/A | - | single   | #N/A     |
| Cyp301a1   | #N/A | #N/A | - | single   | #N/A     |
| Ak6        | #N/A | #N/A | - | single   | #N/A     |
| Amph       | #N/A | #N/A | - | single   | #N/A     |
| Galpha49B  | #N/A | #N/A | - | single   | #N/A     |
| spt4       | #N/A | #N/A | - | single   | #N/A     |
| CG33671    | #N/A | #N/A | - | single   | #N/A     |
| CG33672    | #N/A | #N/A | - | single   | #N/A     |
| lswi       | #N/A | #N/A | - | single   | #N/A     |
| CG8771     | #N/A | #N/A | - | multiple | #N/A     |
| CG13148    | #N/A | #N/A | - | single   | #N/A     |
| CG8768     | #N/A | #N/A | - | single   | #N/A     |
| CG42663    | #N/A | #N/A | - | single   | multiple |
| mos        | #N/A | #N/A | - | #N/A     | single   |
| Taz        | #N/A | #N/A | - | #N/A     | single   |
| mRpL18     | #N/A | #N/A | - | #N/A     | single   |
| ox         | #N/A | #N/A | - | #N/A     | single   |
| Dgkepsilon | #N/A | #N/A | - | #N/A     | single   |
| Cyp9h1     | #N/A | #N/A | - | single   | #N/A     |
| Nmda1      | #N/A | #N/A | - | single   | #N/A     |
| Cap-G      | #N/A | #N/A | - | single   | #N/A     |
| Spt-I      | #N/A | #N/A | - | single   | #N/A     |
| CG4676     | #N/A | #N/A | - | single   | #N/A     |
| CG4679     | #N/A | #N/A | - | single   | #N/A     |
| Dh31-R1    | #N/A | #N/A | - | single   | #N/A     |

|              |      |      |   |        |        |
|--------------|------|------|---|--------|--------|
| CG30065      | #N/A | #N/A | - | #N/A   | single |
| Ser8         | #N/A | #N/A | - | #N/A   | single |
| cbc          | #N/A | #N/A | - | #N/A   | dense  |
| CG42808      | #N/A | #N/A | - | #N/A   | dense  |
| CG18371      | #N/A | #N/A | - | #N/A   | dense  |
| RpS23        | #N/A | #N/A | - | dense  | #N/A   |
| mir-308      | #N/A | #N/A | - | dense  | #N/A   |
| Asx          | #N/A | #N/A | - | single | #N/A   |
| CG12869      | #N/A | #N/A | - | dense  | #N/A   |
| Rpl1         | #N/A | #N/A | - | dense  | #N/A   |
| Su(var)2-HP2 | #N/A | #N/A | - | single | #N/A   |
| CG10249      | #N/A | #N/A | - | single | #N/A   |
| CG34186      | #N/A | #N/A | - | #N/A   | single |
| CG8089       | #N/A | #N/A | - | #N/A   | single |
| CG7544       | #N/A | #N/A | - | #N/A   | single |
| CG34123      | #N/A | #N/A | - | single | #N/A   |
| Pms2         | #N/A | #N/A | - | dense  | #N/A   |
| dup          | #N/A | #N/A | - | dense  | #N/A   |
| CG12964      | #N/A | #N/A | - | #N/A   | single |
| Ir52a        | #N/A | #N/A | - | #N/A   | single |
| CG12963      | #N/A | #N/A | - | #N/A   | single |
| CG8195       | #N/A | #N/A | - | #N/A   | single |
| tun          | #N/A | #N/A | - | single | #N/A   |
| casp         | #N/A | #N/A | - | #N/A   | dense  |
| CG8401       | #N/A | #N/A | - | #N/A   | dense  |
| SP2353       | #N/A | #N/A | - | #N/A   | dense  |
| CG8405       | #N/A | #N/A | - | #N/A   | single |
| Asph         | #N/A | #N/A | - | dense  | #N/A   |
| Jhe          | #N/A | #N/A | - | #N/A   | single |
| CG30095      | #N/A | #N/A | - | #N/A   | single |
| spin         | #N/A | #N/A | - | single | single |
| lbk          | #N/A | #N/A | - | dense  | dense  |
| CG8435       | #N/A | #N/A | - | #N/A   | dense  |
| Ptp52F       | #N/A | #N/A | - | #N/A   | dense  |
| Nox          | #N/A | #N/A | - | #N/A   | single |
| Nup62        | #N/A | #N/A | - | #N/A   | single |
| wcd          | #N/A | #N/A | - | #N/A   | single |
| CG15710      | #N/A | #N/A | - | #N/A   | single |
| DAT          | #N/A | #N/A | - | single | #N/A   |
| CG4945       | #N/A | #N/A | - | single | #N/A   |
| CG8317       | #N/A | #N/A | - | single | #N/A   |
| CG5065       | #N/A | #N/A | - | single | #N/A   |
| unc-104      | #N/A | #N/A | - | #N/A   | dense  |
| CG5348       | #N/A | #N/A | - | #N/A   | dense  |
| Sod2         | #N/A | #N/A | - | #N/A   | dense  |
| Arp53D       | #N/A | #N/A | - | #N/A   | dense  |
| Vkor         | #N/A | #N/A | - | #N/A   | dense  |
| ste24a       | #N/A | #N/A | - | single | #N/A   |
| CG6796       | #N/A | #N/A | - | single | #N/A   |
| CG15611      | #N/A | #N/A | - | single | #N/A   |
| mthl4        | #N/A | #N/A | - | #N/A   | single |
| mthl3        | #N/A | #N/A | - | #N/A   | single |
| ssp4         | #N/A | #N/A | - | #N/A   | dense  |

|            |      |      |   |        |          |
|------------|------|------|---|--------|----------|
| eIF3-S9    | #N/A | #N/A | - | #N/A   | dense    |
| CG18432    | #N/A | #N/A | - | #N/A   | dense    |
| Uhg1       | #N/A | #N/A | - | #N/A   | single   |
| CG4996     | #N/A | #N/A | - | single | #N/A     |
| sub        | #N/A | #N/A | - | single | #N/A     |
| CG5009     | #N/A | #N/A | - | single | #N/A     |
| CG6370     | #N/A | #N/A | - | single | #N/A     |
| CG5036     | #N/A | #N/A | - | single | #N/A     |
| olf186-F   | #N/A | #N/A | - | #N/A   | single   |
| olf186-M   | #N/A | #N/A | - | #N/A   | single   |
| CG30323    | #N/A | #N/A | - | #N/A   | single   |
| thr        | #N/A | #N/A | - | single | #N/A     |
| CG34386    | #N/A | #N/A | - | single | #N/A     |
| Spn6       | #N/A | #N/A | - | single | #N/A     |
| Dip3       | #N/A | #N/A | - | single | #N/A     |
| pAbp       | #N/A | #N/A | - | single | #N/A     |
| CG5726     | #N/A | #N/A | - | #N/A   | single   |
| nopo       | #N/A | #N/A | - | #N/A   | single   |
| CG5721     | #N/A | #N/A | - | single | single   |
| CG33958    | #N/A | #N/A | - | single | #N/A     |
| CG30118    | #N/A | #N/A | - | single | #N/A     |
| slim       | #N/A | #N/A | - | single | single   |
| CG30120    | #N/A | #N/A | - | #N/A   | single   |
| CG5189     | #N/A | #N/A | - | #N/A   | single   |
| Prp19      | #N/A | #N/A | - | #N/A   | single   |
| CG5327     | #N/A | #N/A | - | #N/A   | dense    |
| CG5493     | #N/A | #N/A | - | #N/A   | dense    |
| Atg7       | #N/A | #N/A | - | #N/A   | dense    |
| CG5335     | #N/A | #N/A | - | #N/A   | dense    |
| sec6       | #N/A | #N/A | - | #N/A   | dense    |
| SP2637     | #N/A | #N/A | - | single | #N/A     |
| CG42855    | #N/A | #N/A | - | #N/A   | dense    |
| CG42856    | #N/A | #N/A | - | #N/A   | dense    |
| CG15073    | #N/A | #N/A | - | #N/A   | dense    |
| CG15087    | #N/A | #N/A | - | #N/A   | dense    |
| pncr016:2R | #N/A | #N/A | - | #N/A   | dense    |
| CG15094    | #N/A | #N/A | - | single | #N/A     |
| Vha100-3   | #N/A | #N/A | - | single | #N/A     |
| Fak56D     | #N/A | #N/A | - | single | #N/A     |
| Spt5       | #N/A | #N/A | - | single | #N/A     |
| Obp56c     | #N/A | #N/A | - | single | #N/A     |
| MED8       | #N/A | #N/A | - | #N/A   | dense    |
| CG8929     | #N/A | #N/A | - | #N/A   | dense    |
| CG9945     | #N/A | #N/A | - | single | #N/A     |
| maf-S      | #N/A | #N/A | - | #N/A   | dense    |
| CG11110    | #N/A | #N/A | - | #N/A   | dense    |
| CG9236     | #N/A | #N/A | - | #N/A   | multiple |
| Act57B     | #N/A | #N/A | - | single | #N/A     |
| CG15649    | #N/A | #N/A | - | #N/A   | dense    |
| CG34115    | #N/A | #N/A | - | single | dense    |
| CG9344     | #N/A | #N/A | - | single | dense    |
| CG15650    | #N/A | #N/A | - | single | dense    |
| CG9313     | #N/A | #N/A | - | #N/A   | dense    |

|            |      |      |   |          |        |
|------------|------|------|---|----------|--------|
| CG9418     | #N/A | #N/A | - | #N/A     | dense  |
| CG15657    | #N/A | #N/A | - | #N/A     | dense  |
| Pu         | #N/A | #N/A | - | single   | #N/A   |
| tud        | #N/A | #N/A | - | single   | #N/A   |
| Rgk3       | #N/A | #N/A | - | #N/A     | single |
| CG30394    | #N/A | #N/A | - | single   | #N/A   |
| dom        | #N/A | #N/A | - | single   | #N/A   |
| Acox57D-p  | #N/A | #N/A | - | single   | #N/A   |
| CG30286    | #N/A | #N/A | - | dense    | #N/A   |
| CG30287    | #N/A | #N/A | - | dense    | #N/A   |
| CG10307    | #N/A | #N/A | - | single   | #N/A   |
| CG42497    | #N/A | #N/A | - | single   | #N/A   |
| Tim10      | #N/A | #N/A | - | single   | #N/A   |
| CG42496    | #N/A | #N/A | - | single   | #N/A   |
| Ppcdc      | #N/A | #N/A | - | single   | #N/A   |
| CG13501    | #N/A | #N/A | - | single   | #N/A   |
| Snp        | #N/A | #N/A | - | #N/A     | dense  |
| CG42257    | #N/A | #N/A | - | single   | #N/A   |
| CG11475    | #N/A | #N/A | - | #N/A     | dense  |
| CG11474    | #N/A | #N/A | - | #N/A     | dense  |
| CG6613     | #N/A | #N/A | - | single   | #N/A   |
| wrapper    | #N/A | #N/A | - | single   | #N/A   |
| CG13506    | #N/A | #N/A | - | multiple | #N/A   |
| CG13531    | #N/A | #N/A | - | single   | #N/A   |
| CG42640    | #N/A | #N/A | - | #N/A     | single |
| l(2)k09913 | #N/A | #N/A | - | #N/A     | single |
| CG4585     | #N/A | #N/A | - | #N/A     | single |
| CG5569     | #N/A | #N/A | - | #N/A     | single |
| Thiolase   | #N/A | #N/A | - | #N/A     | single |
| CG5602     | #N/A | #N/A | - | #N/A     | single |
| Upf3       | #N/A | #N/A | - | #N/A     | single |
| CG17658    | #N/A | #N/A | - | #N/A     | single |
| CG5339     | #N/A | #N/A | - | #N/A     | single |
| CG5591     | #N/A | #N/A | - | #N/A     | single |
| RpL39      | #N/A | #N/A | - | single   | #N/A   |
| snama      | #N/A | #N/A | - | single   | #N/A   |
| enok       | #N/A | #N/A | - | single   | #N/A   |
| CG3363     | #N/A | #N/A | - | single   | #N/A   |
| CG3376     | #N/A | #N/A | - | #N/A     | single |
| CG13577    | #N/A | #N/A | - | #N/A     | single |
| bs         | #N/A | #N/A | - | single   | dense  |
| Nurf-38    | #N/A | #N/A | - | single   | #N/A   |
| CG11414    | #N/A | #N/A | - | single   | #N/A   |
| CG16896    | #N/A | #N/A | - | single   | #N/A   |
| CG9083     | #N/A | #N/A | - | #N/A     | dense  |
| CG2857     | #N/A | #N/A | - | #N/A     | dense  |
| CG2790     | #N/A | #N/A | - | single   | #N/A   |
| CG12851    | #N/A | #N/A | - | single   | single |
| CG2736     | #N/A | #N/A | - | #N/A     | dense  |
| mri        | #N/A | #N/A | - | dense    | #N/A   |
| Gyk        | #N/A | #N/A | - | dense    | #N/A   |
| NitFhit    | #N/A | #N/A | - | dense    | #N/A   |
| DIP2       | #N/A | #N/A | - | dense    | #N/A   |

|              |      |      |   |          |        |
|--------------|------|------|---|----------|--------|
| wac          | #N/A | #N/A | - | dense    | #N/A   |
| Tudor-SN     | #N/A | #N/A | - | dense    | #N/A   |
| mthl9        | #N/A | #N/A | - | #N/A     | single |
| CG13891      | #N/A | #N/A | - | #N/A     | single |
| snmRNA:438   | #N/A | #N/A | - | #N/A     | single |
| CG13893      | #N/A | #N/A | - | #N/A     | dense  |
| Ckl1alpha-i3 | #N/A | #N/A | - | dense    | dense  |
| CG13896      | #N/A | #N/A | - | multiple | dense  |
| trio         | #N/A | #N/A | - | #N/A     | dense  |
| CG9205       | #N/A | #N/A | - | #N/A     | dense  |
| CG34022      | #N/A | #N/A | - | single   | #N/A   |
| CG9134       | #N/A | #N/A | - | single   | #N/A   |
| CG32319      | #N/A | #N/A | - | single   | #N/A   |
| CG12084      | #N/A | #N/A | - | #N/A     | dense  |
| CG12011      | #N/A | #N/A | - | single   | #N/A   |
| CG5687       | #N/A | #N/A | - | #N/A     | dense  |
| Mfap1        | #N/A | #N/A | - | #N/A     | dense  |
| mu2          | #N/A | #N/A | - | #N/A     | dense  |
| osm-1        | #N/A | #N/A | - | #N/A     | dense  |
| CG9018       | #N/A | #N/A | - | #N/A     | dense  |
| ACXD         | #N/A | #N/A | - | #N/A     | dense  |
| CG32301      | #N/A | #N/A | - | #N/A     | dense  |
| CG13802      | #N/A | #N/A | - | single   | #N/A   |
| DmsR-2       | #N/A | #N/A | - | single   | #N/A   |
| CG42787      | #N/A | #N/A | - | #N/A     | dense  |
| Pxn          | #N/A | #N/A | - | single   | #N/A   |
| Cht7         | #N/A | #N/A | - | single   | #N/A   |
| CG14962      | #N/A | #N/A | - | single   | #N/A   |
| CG32280      | #N/A | #N/A | - | single   | #N/A   |
| CG14965      | #N/A | #N/A | - | single   | #N/A   |
| Hsp83        | #N/A | #N/A | - | single   | #N/A   |
| RpL28        | #N/A | #N/A | - | single   | #N/A   |
| CG17737      | #N/A | #N/A | - | single   | #N/A   |
| CycJ         | #N/A | #N/A | - | #N/A     | dense  |
| CG14971      | #N/A | #N/A | - | #N/A     | dense  |
| CG32267      | #N/A | #N/A | - | #N/A     | dense  |
| CG42324      | #N/A | #N/A | - | single   | #N/A   |
| CG10858      | #N/A | #N/A | - | #N/A     | single |
| CG32266      | #N/A | #N/A | - | #N/A     | dense  |
| CG1120       | #N/A | #N/A | - | single   | #N/A   |
| Gr64d        | #N/A | #N/A | - | #N/A     | dense  |
| Gr64e        | #N/A | #N/A | - | #N/A     | dense  |
| Gr64f        | #N/A | #N/A | - | #N/A     | dense  |
| CG11593      | #N/A | #N/A | - | #N/A     | dense  |
| Rcd5         | #N/A | #N/A | - | #N/A     | dense  |
| CG1136       | #N/A | #N/A | - | single   | #N/A   |
| ens          | #N/A | #N/A | - | #N/A     | single |
| CG32252      | #N/A | #N/A | - | single   | #N/A   |
| pav          | #N/A | #N/A | - | #N/A     | dense  |
| CG1311       | #N/A | #N/A | - | single   | #N/A   |
| CG11583      | #N/A | #N/A | - | single   | #N/A   |
| CG11582      | #N/A | #N/A | - | single   | #N/A   |
| Cip4         | #N/A | #N/A | - | single   | dense  |

|                    |      |      |   |          |          |
|--------------------|------|------|---|----------|----------|
| mRpS6              | #N/A | #N/A | - | #N/A     | dense    |
| CG33514            | #N/A | #N/A | - | #N/A     | dense    |
| CG11342            | #N/A | #N/A | - | #N/A     | dense    |
| DopEcR             | #N/A | #N/A | - | #N/A     | dense    |
| slow               | #N/A | #N/A | - | #N/A     | dense    |
| CG42540            | #N/A | #N/A | - | single   | multiple |
| Dhc64C             | #N/A | #N/A | - | single   | #N/A     |
| Aats-leu           | #N/A | #N/A | - | single   | #N/A     |
| CG17150            | #N/A | #N/A | - | single   | #N/A     |
| lama               | #N/A | #N/A | - | #N/A     | single   |
| Klp64D             | #N/A | #N/A | - | #N/A     | single   |
| CG4769             | #N/A | #N/A | - | #N/A     | single   |
| Uev1A              | #N/A | #N/A | - | #N/A     | single   |
| CG34342            | #N/A | #N/A | - | single   | #N/A     |
| mthl2              | #N/A | #N/A | - | single   | #N/A     |
| scny               | #N/A | #N/A | - | #N/A     | dense    |
| CG32418            | #N/A | #N/A | - | #N/A     | dense    |
| Myt1               | #N/A | #N/A | - | #N/A     | dense    |
| PGRP-LD            | #N/A | #N/A | - | #N/A     | dense    |
| Pmi                | #N/A | #N/A | - | #N/A     | dense    |
| Cralbp             | #N/A | #N/A | - | #N/A     | dense    |
| Bre1               | #N/A | #N/A | - | #N/A     | dense    |
| CG13295            | #N/A | #N/A | - | single   | #N/A     |
| CG6610             | #N/A | #N/A | - | single   | #N/A     |
| ndl                | #N/A | #N/A | - | #N/A     | dense    |
| zpg                | #N/A | #N/A | - | single   | dense    |
| CG8368             | #N/A | #N/A | - | multiple | dense    |
| CG8398             | #N/A | #N/A | - | single   | dense    |
| CG9948             | #N/A | #N/A | - | #N/A     | dense    |
| CG10075            | #N/A | #N/A | - | #N/A     | dense    |
| Surf1              | #N/A | #N/A | - | #N/A     | dense    |
| CG8641             | #N/A | #N/A | - | #N/A     | single   |
| CG34030            | #N/A | #N/A | - | #N/A     | single   |
| form3              | #N/A | #N/A | - | single   | #N/A     |
| CG8600             | #N/A | #N/A | - | single   | #N/A     |
| eco                | #N/A | #N/A | - | single   | #N/A     |
| pst                | #N/A | #N/A | - | #N/A     | dense    |
| CG18417            | #N/A | #N/A | - | single   | #N/A     |
| CG8539             | #N/A | #N/A | - | #N/A     | single   |
| lqf                | #N/A | #N/A | - | single   | #N/A     |
| CG14837            | #N/A | #N/A | - | #N/A     | single   |
| CG33275            | #N/A | #N/A | - | #N/A     | multiple |
| snoRNA:Me18S-A1806 | #N/A | #N/A | - | #N/A     | single   |
| CG33276            | #N/A | #N/A | - | #N/A     | single   |
| CG7506             | #N/A | #N/A | - | #N/A     | single   |
| Clk                | #N/A | #N/A | - | single   | #N/A     |
| CG32368            | #N/A | #N/A | - | #N/A     | dense    |
| CG8042             | #N/A | #N/A | - | #N/A     | dense    |
| CG42590            | #N/A | #N/A | - | #N/A     | single   |
| CG42591            | #N/A | #N/A | - | #N/A     | single   |
| Arp66B             | #N/A | #N/A | - | single   | #N/A     |
| msk                | #N/A | #N/A | - | single   | #N/A     |
| CG7504             | #N/A | #N/A | - | single   | #N/A     |



|                    |      |      |   |          |        |
|--------------------|------|------|---|----------|--------|
| mus301             | #N/A | #N/A | - | single   | #N/A   |
| CG13676            | #N/A | #N/A | - | single   | #N/A   |
| Cpr66Cb            | #N/A | #N/A | - | #N/A     | dense  |
| pex2               | #N/A | #N/A | - | #N/A     | dense  |
| DNApol-alpha50     | #N/A | #N/A | - | #N/A     | dense  |
| CG7083             | #N/A | #N/A | - | #N/A     | dense  |
| CG6662             | #N/A | #N/A | - | multiple | #N/A   |
| foi                | #N/A | #N/A | - | multiple | #N/A   |
| Zasp66             | #N/A | #N/A | - | #N/A     | dense  |
| Cpr66D             | #N/A | #N/A | - | #N/A     | dense  |
| mfr                | #N/A | #N/A | - | single   | #N/A   |
| Argk               | #N/A | #N/A | - | #N/A     | single |
| CG4911             | #N/A | #N/A | - | #N/A     | single |
| CG4942             | #N/A | #N/A | - | single   | single |
| Tequila            | #N/A | #N/A | - | single   | single |
| Dhpr               | #N/A | #N/A | - | single   | #N/A   |
| CG4484             | #N/A | #N/A | - | single   | #N/A   |
| CG42509            | #N/A | #N/A | - | single   | #N/A   |
| Glu-RIB            | #N/A | #N/A | - | single   | #N/A   |
| CG4080             | #N/A | #N/A | - | single   | #N/A   |
| eIF-4E             | #N/A | #N/A | - | multiple | #N/A   |
| MTF-1              | #N/A | #N/A | - | #N/A     | single |
| Bet3               | #N/A | #N/A | - | #N/A     | single |
| Nf-YA              | #N/A | #N/A | - | #N/A     | single |
| phol               | #N/A | #N/A | - | #N/A     | dense  |
| CG3437             | #N/A | #N/A | - | #N/A     | dense  |
| CG14180            | #N/A | #N/A | - | #N/A     | dense  |
| Uch-L3             | #N/A | #N/A | - | #N/A     | dense  |
| Jarid2             | #N/A | #N/A | - | #N/A     | dense  |
| CG3408             | #N/A | #N/A | - | single   | single |
| RpS9               | #N/A | #N/A | - | single   | single |
| snoRNA:Me28S-G3253 |      |      |   | #N/A     | single |
| CG33703            | #N/A | #N/A | - | #N/A     | single |
| CG33702            | #N/A | #N/A | - | #N/A     | single |
| CG33700            | #N/A | #N/A | - | #N/A     | single |
| CG42673            | #N/A | #N/A | - | single   | #N/A   |
| CG3280             | #N/A | #N/A | - | #N/A     | single |
| LanB2              | #N/A | #N/A | - | single   | single |
| CG18178            | #N/A | #N/A | - | #N/A     | dense  |
| CG14174            | #N/A | #N/A | - | #N/A     | dense  |
| nbs                | #N/A | #N/A | - | #N/A     | dense  |
| defl               | #N/A | #N/A | - | #N/A     | dense  |
| CG18177            | #N/A | #N/A | - | #N/A     | dense  |
| ATPsyn-b           | #N/A | #N/A | - | single   | #N/A   |
| CG6749             | #N/A | #N/A | - | single   | #N/A   |
| CG42268            | #N/A | #N/A | - | #N/A     | single |
| CG33205            | #N/A | #N/A | - | #N/A     | dense  |
| I-2                | #N/A | #N/A | - | #N/A     | dense  |
| Cdk8               | #N/A | #N/A | - | #N/A     | dense  |
| CG6685             | #N/A | #N/A | - | single   | #N/A   |
| Nc                 | #N/A | #N/A | - | single   | #N/A   |
| dpr6               | #N/A | #N/A | - | single   | #N/A   |
| can                | #N/A | #N/A | - | single   | #N/A   |

|             |      |      |   |        |        |
|-------------|------|------|---|--------|--------|
| A2bp1       | #N/A | #N/A | - | #N/A   | dense  |
| CG14151     | #N/A | #N/A | - | #N/A   | dense  |
| CG42536     | #N/A | #N/A | - | #N/A   | dense  |
| CG42535     | #N/A | #N/A | - | #N/A   | dense  |
| CG34001     | #N/A | #N/A | - | #N/A   | dense  |
| hay         | #N/A | #N/A | - | #N/A   | dense  |
| E(z)        | #N/A | #N/A | - | #N/A   | dense  |
| CG8003      | #N/A | #N/A | - | single | dense  |
| CG32068     | #N/A | #N/A | - | single | dense  |
| CG7888      | #N/A | #N/A | - | single | #N/A   |
| CG32075     | #N/A | #N/A | - | single | #N/A   |
| SuUR        | #N/A | #N/A | - | single | #N/A   |
| Mocs1       | #N/A | #N/A | - | single | #N/A   |
| l(3)01239   | #N/A | #N/A | - | single | #N/A   |
| CG6279      | #N/A | #N/A | - | #N/A   | single |
| pncr011:3L  | #N/A | #N/A | - | #N/A   | single |
| CG6272      | #N/A | #N/A | - | #N/A   | single |
| APP-BP1     | #N/A | #N/A | - | #N/A   | single |
| fd68A       | #N/A | #N/A | - | #N/A   | dense  |
| mRpL2       | #N/A | #N/A | - | #N/A   | dense  |
| Ufd1-like   | #N/A | #N/A | - | #N/A   | dense  |
| CG42575     | #N/A | #N/A | - | #N/A   | dense  |
| GlcAT-P     | #N/A | #N/A | - | #N/A   | single |
| CG6199      | #N/A | #N/A | - | #N/A   | single |
| CG7607      | #N/A | #N/A | - | #N/A   | single |
| CG42671     | #N/A | #N/A | - | single | #N/A   |
| CG7573      | #N/A | #N/A | - | single | #N/A   |
| CG42755     | #N/A | #N/A | - | #N/A   | single |
| CG32085     | #N/A | #N/A | - | #N/A   | dense  |
| TfII Ealpha | #N/A | #N/A | - | #N/A   | dense  |
| Sug         | #N/A | #N/A | - | #N/A   | dense  |
| CG32087     | #N/A | #N/A | - | single | #N/A   |
| Muc68D      | #N/A | #N/A | - | #N/A   | single |
| CG17826     | #N/A | #N/A | - | single | #N/A   |
| obst-G      | #N/A | #N/A | - | single | #N/A   |
| CG6938      | #N/A | #N/A | - | #N/A   | dense  |
| CG6931      | #N/A | #N/A | - | #N/A   | dense  |
| viaf        | #N/A | #N/A | - | #N/A   | dense  |
| Grip163     | #N/A | #N/A | - | #N/A   | dense  |
| Pop2        | #N/A | #N/A | - | #N/A   | dense  |
| CG6793      | #N/A | #N/A | - | single | #N/A   |
| ssp         | #N/A | #N/A | - | #N/A   | dense  |
| CG11560     | #N/A | #N/A | - | #N/A   | dense  |
| Est-6       | #N/A | #N/A | - | single | #N/A   |
| CG4300      | #N/A | #N/A | - | #N/A   | dense  |
| CG10426     | #N/A | #N/A | - | #N/A   | dense  |
| CG32105     | #N/A | #N/A | - | #N/A   | dense  |
| CG32104     | #N/A | #N/A | - | #N/A   | dense  |
| Pbprp1      | #N/A | #N/A | - | #N/A   | dense  |
| Smyd4       | #N/A | #N/A | - | #N/A   | dense  |
| CG32103     | #N/A | #N/A | - | #N/A   | dense  |
| CG33725     | #N/A | #N/A | - | single | #N/A   |
| vih         | #N/A | #N/A | - | dense  | #N/A   |

|              |      |      |   |          |        |
|--------------|------|------|---|----------|--------|
| CG10654      | #N/A | #N/A | - | dense    | #N/A   |
| sti          | #N/A | #N/A | - | dense    | #N/A   |
| CG10752      | #N/A | #N/A | - | #N/A     | single |
| CG34429      | #N/A | #N/A | - | single   | #N/A   |
| CG11251      | #N/A | #N/A | - | multiple | #N/A   |
| flr          | #N/A | #N/A | - | dense    | #N/A   |
| bru-3        | #N/A | #N/A | - | single   | #N/A   |
| Tsp68C       | #N/A | #N/A | - | single   | #N/A   |
| CG32137      | #N/A | #N/A | - | single   | #N/A   |
| ssp2         | #N/A | #N/A | - | single   | #N/A   |
| CG32138      | #N/A | #N/A | - | #N/A     | single |
| pex1         | #N/A | #N/A | - | #N/A     | single |
| CG9592       | #N/A | #N/A | - | #N/A     | single |
| CG4613       | #N/A | #N/A | - | #N/A     | single |
| Mpcp         | #N/A | #N/A | - | single   | #N/A   |
| CG34039      | #N/A | #N/A | - | #N/A     | single |
| Leucokinin   | #N/A | #N/A | - | #N/A     | single |
| CG17839      | #N/A | #N/A | - | single   | #N/A   |
| FucTA        | #N/A | #N/A | - | #N/A     | dense  |
| CG13454      | #N/A | #N/A | - | single   | #N/A   |
| mex1         | #N/A | #N/A | - | single   | #N/A   |
| AGO2         | #N/A | #N/A | - | single   | #N/A   |
| CG6498       | #N/A | #N/A | - | single   | #N/A   |
| flower       | #N/A | #N/A | - | #N/A     | single |
| Ckl1alpha-i1 | #N/A | #N/A | - | dense    | single |
| GXIVsPLA2    | #N/A | #N/A | - | single   | #N/A   |
| CG42717      | #N/A | #N/A | - | #N/A     | dense  |
| CG42716      | #N/A | #N/A | - | #N/A     | dense  |
| CG42538      | #N/A | #N/A | - | #N/A     | dense  |
| CG5895       | #N/A | #N/A | - | #N/A     | dense  |
| CG5414       | #N/A | #N/A | - | single   | #N/A   |
| CG5222       | #N/A | #N/A | - | single   | #N/A   |
| CG4573       | #N/A | #N/A | - | #N/A     | dense  |
| Aats-tyr     | #N/A | #N/A | - | #N/A     | dense  |
| dsx-c73A     | #N/A | #N/A | - | #N/A     | single |
| CG32159      | #N/A | #N/A | - | single   | #N/A   |
| Su(P)        | #N/A | #N/A | - | #N/A     | dense  |
| CG4101       | #N/A | #N/A | - | #N/A     | dense  |
| Mo25         | #N/A | #N/A | - | #N/A     | dense  |
| Dbp73D       | #N/A | #N/A | - | single   | #N/A   |
| CG9701       | #N/A | #N/A | - | #N/A     | dense  |
| nudC         | #N/A | #N/A | - | #N/A     | single |
| Lmpt         | #N/A | #N/A | - | single   | #N/A   |
| Nc73EF       | #N/A | #N/A | - | single   | #N/A   |
| Papst2       | #N/A | #N/A | - | single   | #N/A   |
| CG14057      | #N/A | #N/A | - | single   | #N/A   |
| Mip          | #N/A | #N/A | - | single   | #N/A   |
| sec3         | #N/A | #N/A | - | single   | #N/A   |
| CG7603       | #N/A | #N/A | - | #N/A     | single |
| star1        | #N/A | #N/A | - | #N/A     | single |
| CG14073      | #N/A | #N/A | - | #N/A     | single |
| HipHop       | #N/A | #N/A | - | #N/A     | single |
| Cat          | #N/A | #N/A | - | #N/A     | single |

|            |      |      |   |          |          |
|------------|------|------|---|----------|----------|
| CG6865     | #N/A | #N/A | - | #N/A     | dense    |
| CG14074    | #N/A | #N/A | - | dense    | dense    |
| dysb       | #N/A | #N/A | - | #N/A     | dense    |
| CG6856     | #N/A | #N/A | - | dense    | #N/A     |
| CG6852     | #N/A | #N/A | - | #N/A     | dense    |
| Rad9       | #N/A | #N/A | - | #N/A     | dense    |
| blos3      | #N/A | #N/A | - | #N/A     | dense    |
| CG3961     | #N/A | #N/A | - | multiple | #N/A     |
| CG14077    | #N/A | #N/A | - | #N/A     | single   |
| lr75d      | #N/A | #N/A | - | #N/A     | single   |
| CG18135    | #N/A | #N/A | - | single   | #N/A     |
| CG3808     | #N/A | #N/A | - | single   | #N/A     |
| CG18136    | #N/A | #N/A | - | single   | #N/A     |
| mRpl21     | #N/A | #N/A | - | #N/A     | single   |
| rept       | #N/A | #N/A | - | #N/A     | single   |
| nes        | #N/A | #N/A | - | #N/A     | single   |
| l(3)76Bdm  | #N/A | #N/A | - | single   | #N/A     |
| asf1       | #N/A | #N/A | - | single   | #N/A     |
| Gbeta76C   | #N/A | #N/A | - | #N/A     | dense    |
| verm       | #N/A | #N/A | - | #N/A     | dense    |
| NPFR76F    | #N/A | #N/A | - | single   | #N/A     |
| CG17145    | #N/A | #N/A | - | #N/A     | dense    |
| CG17147    | #N/A | #N/A | - | #N/A     | dense    |
| Su(var)3-3 | #N/A | #N/A | - | #N/A     | dense    |
| CG13813    | #N/A | #N/A | - | #N/A     | dense    |
| lde        | #N/A | #N/A | - | single   | #N/A     |
| RhoBTB     | #N/A | #N/A | - | multiple | #N/A     |
| CG5498     | #N/A | #N/A | - | single   | #N/A     |
| CG5847     | #N/A | #N/A | - | dense    | #N/A     |
| CG32428    | #N/A | #N/A | - | #N/A     | dense    |
| CG5969     | #N/A | #N/A | - | single   | dense    |
| CG5976     | #N/A | #N/A | - | single   | dense    |
| CG5130     | #N/A | #N/A | - | single   | #N/A     |
| CG4825     | #N/A | #N/A | - | single   | #N/A     |
| CG13255    | #N/A | #N/A | - | #N/A     | dense    |
| CSN3       | #N/A | #N/A | - | #N/A     | dense    |
| CG11456    | #N/A | #N/A | - | #N/A     | dense    |
| CG32432    | #N/A | #N/A | - | single   | dense    |
| CG11458    | #N/A | #N/A | - | #N/A     | multiple |
| CG10589    | #N/A | #N/A | - | #N/A     | single   |
| Cpr78Ca    | #N/A | #N/A | - | #N/A     | dense    |
| CG32440    | #N/A | #N/A | - | single   | #N/A     |
| CG7181     | #N/A | #N/A | - | single   | #N/A     |
| VhaM9.7-2  | #N/A | #N/A | - | single   | #N/A     |
| Cpr78E     | #N/A | #N/A | - | #N/A     | single   |
| CG11249    | #N/A | #N/A | - | #N/A     | single   |
| eg         | #N/A | #N/A | - | #N/A     | dense    |
| CG7145     | #N/A | #N/A | - | single   | #N/A     |
| CG14563    | #N/A | #N/A | - | single   | #N/A     |
| CG32450    | #N/A | #N/A | - | single   | #N/A     |
| CG33169    | #N/A | #N/A | - | single   | #N/A     |
| CG33170    | #N/A | #N/A | - | single   | #N/A     |
| nvd        | #N/A | #N/A | - | #N/A     | single   |

|            |      |      |   |          |          |
|------------|------|------|---|----------|----------|
| aux        | #N/A | #N/A | - | #N/A     | single   |
| CG31516    | #N/A | #N/A | - | #N/A     | single   |
| tub        | #N/A | #N/A | - | single   | #N/A     |
| CG14646    | #N/A | #N/A | - | single   | #N/A     |
| CG31530    | #N/A | #N/A | - | #N/A     | single   |
| CG2604     | #N/A | #N/A | - | #N/A     | single   |
| CG1115     | #N/A | #N/A | - | #N/A     | single   |
| katanin-60 | #N/A | #N/A | - | #N/A     | single   |
| CG12163    | #N/A | #N/A | - | #N/A     | single   |
| CG1113     | #N/A | #N/A | - | #N/A     | single   |
| CG11999    | #N/A | #N/A | - | #N/A     | single   |
| CG1161     | #N/A | #N/A | - | #N/A     | single   |
| Prosbeta7  | #N/A | #N/A | - | #N/A     | single   |
| RpII18     | #N/A | #N/A | - | dense    | #N/A     |
| hd         | #N/A | #N/A | - | dense    | #N/A     |
| CG31547    | #N/A | #N/A | - | single   | #N/A     |
| CG2182     | #N/A | #N/A | - | single   | #N/A     |
| CG1239     | #N/A | #N/A | - | #N/A     | single   |
| CG2100     | #N/A | #N/A | - | #N/A     | single   |
| CG1236     | #N/A | #N/A | - | #N/A     | single   |
| Gasp       | #N/A | #N/A | - | single   | #N/A     |
| CG1315     | #N/A | #N/A | - | single   | #N/A     |
| CG1307     | #N/A | #N/A | - | single   | #N/A     |
| Spase18-21 | #N/A | #N/A | - | single   | #N/A     |
| e(y)2b     | #N/A | #N/A | - | dense    | #N/A     |
| CG10098    | #N/A | #N/A | - | multiple | #N/A     |
| CG10068    | #N/A | #N/A | - | #N/A     | single   |
| CR42875    | #N/A | #N/A | - | #N/A     | single   |
| CG31248    | #N/A | #N/A | - | #N/A     | single   |
| CG31493    | #N/A | #N/A | - | #N/A     | single   |
| CG14609    | #N/A | #N/A | - | single   | #N/A     |
| CG14608    | #N/A | #N/A | - | #N/A     | single   |
| CG31496    | #N/A | #N/A | - | #N/A     | single   |
| nxf4       | #N/A | #N/A | - | #N/A     | single   |
| CG10092    | #N/A | #N/A | - | single   | #N/A     |
| puc        | #N/A | #N/A | - | multiple | single   |
| CG18249    | #N/A | #N/A | - | single   | #N/A     |
| CG15864    | #N/A | #N/A | - | single   | #N/A     |
| Cyp313b1   | #N/A | #N/A | - | single   | #N/A     |
| mRpL19     | #N/A | #N/A | - | #N/A     | dense    |
| CG9773     | #N/A | #N/A | - | #N/A     | dense    |
| CG9731     | #N/A | #N/A | - | single   | #N/A     |
| RagA       | #N/A | #N/A | - | single   | #N/A     |
| CG11984    | #N/A | #N/A | - | #N/A     | single   |
| CG11985    | #N/A | #N/A | - | single   | single   |
| CG11986    | #N/A | #N/A | - | single   | single   |
| tgo        | #N/A | #N/A | - | dense    | multiple |
| CG18005    | #N/A | #N/A | - | #N/A     | dense    |
| Ada        | #N/A | #N/A | - | #N/A     | dense    |
| ird1       | #N/A | #N/A | - | #N/A     | single   |
| CG8420     | #N/A | #N/A | - | #N/A     | single   |
| CG16733    | #N/A | #N/A | - | #N/A     | single   |
| Aats-trp   | #N/A | #N/A | - | single   | #N/A     |

|             |      |      |   |          |        |
|-------------|------|------|---|----------|--------|
| Vps16A      | #N/A | #N/A | - | single   | #N/A   |
| CG33937     | #N/A | #N/A | - | single   | #N/A   |
| Rlc1        | #N/A | #N/A | - | #N/A     | dense  |
| CG8165      | #N/A | #N/A | - | #N/A     | dense  |
| CG8176      | #N/A | #N/A | - | #N/A     | dense  |
| dmt         | #N/A | #N/A | - | dense    | #N/A   |
| MtnA        | #N/A | #N/A | - | single   | #N/A   |
| CG8500      | #N/A | #N/A | - | single   | #N/A   |
| Mical       | #N/A | #N/A | - | single   | #N/A   |
| CG6241      | #N/A | #N/A | - | single   | #N/A   |
| Invadolysin | #N/A | #N/A | - | single   | #N/A   |
| Bruce       | #N/A | #N/A | - | multiple | #N/A   |
| CG14681     | #N/A | #N/A | - | single   | #N/A   |
| Skeletor    | #N/A | #N/A | - | single   | #N/A   |
| CG14691     | #N/A | #N/A | - | single   | #N/A   |
| Ugt86Dj     | #N/A | #N/A | - | multiple | #N/A   |
| Ugt86Dh     | #N/A | #N/A | - | multiple | #N/A   |
| CG31386     | #N/A | #N/A | - | single   | #N/A   |
| RpL24-like  | #N/A | #N/A | - | #N/A     | dense  |
| CG5276      | #N/A | #N/A | - | #N/A     | dense  |
| CG6744      | #N/A | #N/A | - | #N/A     | dense  |
| CG5281      | #N/A | #N/A | - | #N/A     | dense  |
| sals        | #N/A | #N/A | - | #N/A     | dense  |
| Csk         | #N/A | #N/A | - | dense    | #N/A   |
| Elp1        | #N/A | #N/A | - | #N/A     | single |
| CG18347     | #N/A | #N/A | - | single   | #N/A   |
| mfas        | #N/A | #N/A | - | #N/A     | single |
| dpr15       | #N/A | #N/A | - | #N/A     | single |
| Cpn         | #N/A | #N/A | - | #N/A     | single |
| CG34402     | #N/A | #N/A | - | dense    | #N/A   |
| lig3        | #N/A | #N/A | - | dense    | #N/A   |
| desat1      | #N/A | #N/A | - | #N/A     | single |
| CG5538      | #N/A | #N/A | - | #N/A     | single |
| CG18549     | #N/A | #N/A | - | #N/A     | single |
| CG5509      | #N/A | #N/A | - | #N/A     | single |
| CG6225      | #N/A | #N/A | - | single   | #N/A   |
| beat-Va     | #N/A | #N/A | - | #N/A     | single |
| timeout     | #N/A | #N/A | - | single   | #N/A   |
| CG32473     | #N/A | #N/A | - | single   | #N/A   |
| CG8784      | #N/A | #N/A | - | #N/A     | single |
| CR33328     | #N/A | #N/A | - | #N/A     | single |
| omd         | #N/A | #N/A | - | single   | #N/A   |
| Adgf-C      | #N/A | #N/A | - | single   | #N/A   |
| CG31469     | #N/A | #N/A | - | single   | #N/A   |
| CG12207     | #N/A | #N/A | - | single   | #N/A   |
| pr-set7     | #N/A | #N/A | - | single   | #N/A   |
| CG31320     | #N/A | #N/A | - | single   | #N/A   |
| CG34388     | #N/A | #N/A | - | single   | #N/A   |
| HtrA2       | #N/A | #N/A | - | single   | #N/A   |
| mRpL11      | #N/A | #N/A | - | single   | #N/A   |
| Cad88C      | #N/A | #N/A | - | single   | #N/A   |
| smp-30      | #N/A | #N/A | - | #N/A     | single |
| CG7362      | #N/A | #N/A | - | #N/A     | single |

|               |      |      |   |        |        |
|---------------|------|------|---|--------|--------|
| CG42788       | #N/A | #N/A | - | #N/A   | single |
| CG3987        | #N/A | #N/A | - | single | #N/A   |
| CG14869       | #N/A | #N/A | - | single | #N/A   |
| CG31446       | #N/A | #N/A | - | #N/A   | dense  |
| CG9590        | #N/A | #N/A | - | #N/A   | dense  |
| CG9589        | #N/A | #N/A | - | #N/A   | dense  |
| CG9593        | #N/A | #N/A | - | single | #N/A   |
| alpha-Man-IIb | #N/A | #N/A | - | single | #N/A   |
| glob1         | #N/A | #N/A | - | #N/A   | single |
| Rbf2          | #N/A | #N/A | - | #N/A   | dense  |
| ird5          | #N/A | #N/A | - | #N/A   | dense  |
| CG5013        | #N/A | #N/A | - | #N/A   | dense  |
| msps          | #N/A | #N/A | - | single | dense  |
| Bin1          | #N/A | #N/A | - | single | #N/A   |
| sra           | #N/A | #N/A | - | single | #N/A   |
| Sulf1         | #N/A | #N/A | - | single | #N/A   |
| CG6901        | #N/A | #N/A | - | #N/A   | single |
| CG17929       | #N/A | #N/A | - | #N/A   | single |
| Gyc-89Db      | #N/A | #N/A | - | single | #N/A   |
| CG14909       | #N/A | #N/A | - | #N/A   | dense  |
| Actn3         | #N/A | #N/A | - | #N/A   | dense  |
| Ahcy89E       | #N/A | #N/A | - | #N/A   | dense  |
| m-cup         | #N/A | #N/A | - | #N/A   | dense  |
| Det           | #N/A | #N/A | - | #N/A   | dense  |
| CG5285        | #N/A | #N/A | - | #N/A   | dense  |
| CG5292        | #N/A | #N/A | - | #N/A   | dense  |
| Mur89F        | #N/A | #N/A | - | #N/A   | dense  |
| CG14323       | #N/A | #N/A | - | single | #N/A   |
| CG7523        | #N/A | #N/A | - | single | #N/A   |
| CG14321       | #N/A | #N/A | - | single | #N/A   |
| CG7713        | #N/A | #N/A | - | single | dense  |
| CG7379        | #N/A | #N/A | - | #N/A   | dense  |
| CG17803       | #N/A | #N/A | - | #N/A   | dense  |
| CG17806       | #N/A | #N/A | - | #N/A   | dense  |
| CG14315       | #N/A | #N/A | - | #N/A   | single |
| Rpb4          | #N/A | #N/A | - | single | #N/A   |
| moi           | #N/A | #N/A | - | single | #N/A   |
| tatl          | #N/A | #N/A | - | single | #N/A   |
| PKD           | #N/A | #N/A | - | single | #N/A   |
| CG7669        | #N/A | #N/A | - | #N/A   | dense  |
| WRNexo        | #N/A | #N/A | - | #N/A   | dense  |
| CG7671        | #N/A | #N/A | - | #N/A   | dense  |
| gl            | #N/A | #N/A | - | #N/A   | dense  |
| Vha100-2      | #N/A | #N/A | - | #N/A   | dense  |
| koko          | #N/A | #N/A | - | #N/A   | dense  |
| CG12333       | #N/A | #N/A | - | #N/A   | dense  |
| snRNP-U1-C    | #N/A | #N/A | - | #N/A   | dense  |
| P5cr          | #N/A | #N/A | - | #N/A   | single |
| Prp18         | #N/A | #N/A | - | #N/A   | single |
| CG6013        | #N/A | #N/A | - | #N/A   | single |
| CG6026        | #N/A | #N/A | - | single | #N/A   |
| sqz           | #N/A | #N/A | - | single | #N/A   |
| CG14282       | #N/A | #N/A | - | #N/A   | single |

|            |      |      |   |        |        |
|------------|------|------|---|--------|--------|
| CG31244    | #N/A | #N/A | - | single | #N/A   |
| CG4562     | #N/A | #N/A | - | #N/A   | dense  |
| CG17186    | #N/A | #N/A | - | #N/A   | dense  |
| Arc42      | #N/A | #N/A | - | #N/A   | dense  |
| Pk92B      | #N/A | #N/A | - | #N/A   | dense  |
| MED25      | #N/A | #N/A | - | #N/A   | dense  |
| CG17190    | #N/A | #N/A | - | #N/A   | dense  |
| trem       | #N/A | #N/A | - | #N/A   | dense  |
| CG4936     | #N/A | #N/A | - | #N/A   | dense  |
| CG10889    | #N/A | #N/A | - | #N/A   | dense  |
| CG17193    | #N/A | #N/A | - | #N/A   | dense  |
| Elongin-B  | #N/A | #N/A | - | #N/A   | dense  |
| Srp14      | #N/A | #N/A | - | #N/A   | dense  |
| CG34008    | #N/A | #N/A | - | #N/A   | dense  |
| CG16953    | #N/A | #N/A | - | #N/A   | dense  |
| CG31191    | #N/A | #N/A | - | #N/A   | single |
| CG17278    | #N/A | #N/A | - | single | #N/A   |
| Mvl        | #N/A | #N/A | - | single | #N/A   |
| AnnIX      | #N/A | #N/A | - | #N/A   | dense  |
| r-l        | #N/A | #N/A | - | #N/A   | dense  |
| dmrt93B    | #N/A | #N/A | - | #N/A   | dense  |
| CG7056     | #N/A | #N/A | - | #N/A   | dense  |
| CG5745     | #N/A | #N/A | - | #N/A   | dense  |
| sec15      | #N/A | #N/A | - | #N/A   | dense  |
| rtet       | #N/A | #N/A | - | #N/A   | dense  |
| Rab11      | #N/A | #N/A | - | #N/A   | dense  |
| ppan       | #N/A | #N/A | - | #N/A   | dense  |
| CG17282    | #N/A | #N/A | - | #N/A   | dense  |
| slmb       | #N/A | #N/A | - | single | dense  |
| CG5793     | #N/A | #N/A | - | single | #N/A   |
| CG10824    | #N/A | #N/A | - | #N/A   | single |
| SNF4Agamma | #N/A | #N/A | - | #N/A   | dense  |
| CG42777    | #N/A | #N/A | - | #N/A   | dense  |
| CheB93a    | #N/A | #N/A | - | single | #N/A   |
| CG7922     | #N/A | #N/A | - | dense  | #N/A   |
| CG6353     | #N/A | #N/A | - | single | dense  |
| CG31176    | #N/A | #N/A | - | #N/A   | single |
| tsl        | #N/A | #N/A | - | single | #N/A   |
| Gr93d      | #N/A | #N/A | - | #N/A   | single |
| CG31431    | #N/A | #N/A | - | single | #N/A   |
| CG31178    | #N/A | #N/A | - | single | #N/A   |
| CG31465    | #N/A | #N/A | - | #N/A   | dense  |
| fit        | #N/A | #N/A | - | #N/A   | dense  |
| CG17819    | #N/A | #N/A | - | #N/A   | dense  |
| dnd        | #N/A | #N/A | - | #N/A   | dense  |
| CG6678     | #N/A | #N/A | - | #N/A   | dense  |
| pit        | #N/A | #N/A | - | #N/A   | single |
| CG13408    | #N/A | #N/A | - | #N/A   | single |
| Gld2       | #N/A | #N/A | - | single | #N/A   |
| Nop56      | #N/A | #N/A | - | single | #N/A   |
| mats       | #N/A | #N/A | - | single | #N/A   |
| oa2        | #N/A | #N/A | - | single | #N/A   |
| CG5346     | #N/A | #N/A | - | single | #N/A   |



|             |      |      |   |          |        |
|-------------|------|------|---|----------|--------|
| CG33099     | #N/A | #N/A | - | single   | #N/A   |
| CG31158     | #N/A | #N/A | - | multiple | #N/A   |
| CG6972      | #N/A | #N/A | - | single   | #N/A   |
| CG13842     | #N/A | #N/A | - | single   | #N/A   |
| unk         | #N/A | #N/A | - | dense    | #N/A   |
| CG4624      | #N/A | #N/A | - | dense    | #N/A   |
| fzo         | #N/A | #N/A | - | single   | #N/A   |
| CG13826     | #N/A | #N/A | - | #N/A     | single |
| CG10177     | #N/A | #N/A | - | single   | #N/A   |
| CG10170     | #N/A | #N/A | - | single   | #N/A   |
| CG16732     | #N/A | #N/A | - | single   | #N/A   |
| CG13822     | #N/A | #N/A | - | #N/A     | single |
| CG10157     | #N/A | #N/A | - | #N/A     | single |
| eIF-3p66    | #N/A | #N/A | - | #N/A     | single |
| CG31413     | #N/A | #N/A | - | dense    | #N/A   |
| CG10221     | #N/A | #N/A | - | dense    | #N/A   |
| Plip        | #N/A | #N/A | - | dense    | #N/A   |
| CG10219     | #N/A | #N/A | - | dense    | #N/A   |
| CG10217     | #N/A | #N/A | - | dense    | #N/A   |
| CG33111     | #N/A | #N/A | - | multiple | single |
| eIF4G2      | #N/A | #N/A | - | multiple | single |
| TfIIA-S     | #N/A | #N/A | - | #N/A     | dense  |
| CG13597     | #N/A | #N/A | - | single   | #N/A   |
| sba         | #N/A | #N/A | - | #N/A     | single |
| CG5857      | #N/A | #N/A | - | #N/A     | dense  |
| CG13601     | #N/A | #N/A | - | #N/A     | dense  |
| CG13602     | #N/A | #N/A | - | #N/A     | dense  |
| CG31142     | #N/A | #N/A | - | #N/A     | dense  |
| Aats-glupro | #N/A | #N/A | - | single   | #N/A   |
| AP-1sigma   | #N/A | #N/A | - | single   | #N/A   |
| 4EHP        | #N/A | #N/A | - | single   | #N/A   |
| Mpk2        | #N/A | #N/A | - | single   | #N/A   |
| CG6178      | #N/A | #N/A | - | single   | #N/A   |
| Myo95E      | #N/A | #N/A | - | single   | #N/A   |
| CG6182      | #N/A | #N/A | - | single   | #N/A   |
| mRpS24      | #N/A | #N/A | - | single   | #N/A   |
| Apc2        | #N/A | #N/A | - | single   | #N/A   |
| CG17780     | #N/A | #N/A | - | single   | #N/A   |
| CG17781     | #N/A | #N/A | - | single   | #N/A   |
| HDC15381    | #N/A | #N/A | - | single   | #N/A   |
| CG5807      | #N/A | #N/A | - | single   | #N/A   |
| CG31121     | #N/A | #N/A | - | single   | #N/A   |
| CG31120     | #N/A | #N/A | - | #N/A     | dense  |
| CG11168     | #N/A | #N/A | - | #N/A     | dense  |
| CG11120     | #N/A | #N/A | - | #N/A     | dense  |
| CG31108     | #N/A | #N/A | - | single   | #N/A   |
| CG11854     | #N/A | #N/A | - | single   | #N/A   |
| bam         | #N/A | #N/A | - | single   | #N/A   |
| CG4730      | #N/A | #N/A | - | single   | #N/A   |
| CG5039      | #N/A | #N/A | - | single   | #N/A   |
| CG4743      | #N/A | #N/A | - | single   | #N/A   |
| LpR1        | #N/A | #N/A | - | #N/A     | single |
| CG31324     | #N/A | #N/A | - | single   | #N/A   |

|              |      |      |   |        |          |
|--------------|------|------|---|--------|----------|
| CG34130      | #N/A | #N/A | - | #N/A   | dense    |
| CG34129      | #N/A | #N/A | - | #N/A   | dense    |
| CG33970      | #N/A | #N/A | - | single | #N/A     |
| CG5491       | #N/A | #N/A | - | #N/A   | dense    |
| ball         | #N/A | #N/A | - | #N/A   | dense    |
| His2Av       | #N/A | #N/A | - | #N/A   | dense    |
| BM-40-SPARC  | #N/A | #N/A | - | #N/A   | dense    |
| NepYr        | #N/A | #N/A | - | single | #N/A     |
| TwdIT        | #N/A | #N/A | - | single | #N/A     |
| side         | #N/A | #N/A | - | single | #N/A     |
| wdb          | #N/A | #N/A | - | single | #N/A     |
| CG31055      | #N/A | #N/A | - | #N/A   | single   |
| CG12880      | #N/A | #N/A | - | #N/A   | multiple |
| CG12879      | #N/A | #N/A | - | #N/A   | single   |
| Acp98AB      | #N/A | #N/A | - | #N/A   | single   |
| CG4849       | #N/A | #N/A | - | single | #N/A     |
| Ppn          | #N/A | #N/A | - | single | #N/A     |
| Slu7         | #N/A | #N/A | - | #N/A   | single   |
| CG15817      | #N/A | #N/A | - | #N/A   | single   |
| CG11951      | #N/A | #N/A | - | #N/A   | single   |
| CG31427      | #N/A | #N/A | - | #N/A   | single   |
| CG31445      | #N/A | #N/A | - | #N/A   | single   |
| SP1029       | #N/A | #N/A | - | #N/A   | dense    |
| CG1969       | #N/A | #N/A | - | #N/A   | dense    |
| CG7609       | #N/A | #N/A | - | #N/A   | dense    |
| CG1972       | #N/A | #N/A | - | #N/A   | dense    |
| ATPsyn-gamma | #N/A | #N/A | - | #N/A   | dense    |
| yata         | #N/A | #N/A | - | #N/A   | dense    |
| Cad99C       | #N/A | #N/A | - | #N/A   | single   |
| CG7816       | #N/A | #N/A | - | single | #N/A     |
| CG34133      | #N/A | #N/A | - | single | single   |
| CG31038      | #N/A | #N/A | - | single | single   |
| CG7946       | #N/A | #N/A | - | #N/A   | dense    |
| spn-A        | #N/A | #N/A | - | #N/A   | dense    |
| CG15526      | #N/A | #N/A | - | #N/A   | dense    |
| CG34317      | #N/A | #N/A | - | #N/A   | dense    |
| CG7950       | #N/A | #N/A | - | #N/A   | dense    |
| sima         | #N/A | #N/A | - | #N/A   | dense    |
| CG9737       | #N/A | #N/A | - | single | #N/A     |
| CG9682       | #N/A | #N/A | - | single | #N/A     |
| CG18404      | #N/A | #N/A | - | single | #N/A     |
| CG1342       | #N/A | #N/A | - | single | #N/A     |
| CG12069      | #N/A | #N/A | - | single | #N/A     |
| Sap-r        | #N/A | #N/A | - | #N/A   | single   |
| Cyp4c3       | #N/A | #N/A | - | single | single   |
| 5-HT7        | #N/A | #N/A | - | #N/A   | single   |
| l(3)03670    | #N/A | #N/A | - | single | #N/A     |
| CG11318      | #N/A | #N/A | - | single | #N/A     |
| CG31005      | #N/A | #N/A | - | single | #N/A     |
| CG34347      | #N/A | #N/A | - | single | #N/A     |
| CG1607       | #N/A | #N/A | - | single | #N/A     |
| CG31204      | #N/A | #N/A | - | single | #N/A     |
| CG42693      | #N/A | #N/A | - | #N/A   | single   |

|             |      |      |   |          |          |
|-------------|------|------|---|----------|----------|
| salt        | #N/A | #N/A | - | dense    | #N/A     |
| pncr017:3R  | #N/A | #N/A | - | dense    | #N/A     |
| CG2135      | #N/A | #N/A | - | dense    | #N/A     |
| mod         | #N/A | #N/A | - | single   | #N/A     |
| SP71        | #N/A | #N/A | - | single   | #N/A     |
| CG3038      | #N/A | #N/A | - | single   | #N/A     |
| G9a         | #N/A | #N/A | - | single   | #N/A     |
| CG18273     | #N/A | #N/A | - | single   | #N/A     |
| CG13365     | #N/A | #N/A | - | #N/A     | single   |
| eIF4E-7     | #N/A | #N/A | - | #N/A     | single   |
| CG34320     | #N/A | #N/A | - | #N/A     | single   |
| br          | #N/A | #N/A | - | single   | #N/A     |
| CG3795      | #N/A | #N/A | - | #N/A     | single   |
| CG2924      | #N/A | #N/A | - | single   | #N/A     |
| CG2918      | #N/A | #N/A | - | multiple | single   |
| Vml         | #N/A | #N/A | - | #N/A     | single   |
| z           | #N/A | #N/A | - | #N/A     | dense    |
| sgg         | #N/A | #N/A | - | #N/A     | single   |
| HLH3B       | #N/A | #N/A | - | #N/A     | single   |
| CG32792     | #N/A | #N/A | - | single   | #N/A     |
| VhaAC39     | #N/A | #N/A | - | single   | #N/A     |
| CG32778     | #N/A | #N/A | - | #N/A     | single   |
| CG15376     | #N/A | #N/A | - | #N/A     | single   |
| CG11436     | #N/A | #N/A | - | single   | #N/A     |
| CG3527      | #N/A | #N/A | - | single   | #N/A     |
| CG11444     | #N/A | #N/A | - | single   | #N/A     |
| CG12179     | #N/A | #N/A | - | #N/A     | dense    |
| pon         | #N/A | #N/A | - | #N/A     | dense    |
| CG3081      | #N/A | #N/A | - | #N/A     | dense    |
| Proc-R      | #N/A | #N/A | - | single   | #N/A     |
| CG42749     | #N/A | #N/A | - | #N/A     | single   |
| CG12730     | #N/A | #N/A | - | single   | #N/A     |
| CG42699     | #N/A | #N/A | - | #N/A     | single   |
| CG3108      | #N/A | #N/A | - | #N/A     | single   |
| Grip        | #N/A | #N/A | - | #N/A     | single   |
| CG4766      | #N/A | #N/A | - | single   | single   |
| sqh         | #N/A | #N/A | - | single   | #N/A     |
| Spt6        | #N/A | #N/A | - | #N/A     | dense    |
| CG3566      | #N/A | #N/A | - | single   | dense    |
| Ubi-p5E     | #N/A | #N/A | - | single   | dense    |
| CG3342      | #N/A | #N/A | - | #N/A     | dense    |
| CG17717     | #N/A | #N/A | - | single   | #N/A     |
| Pat1        | #N/A | #N/A | - | single   | #N/A     |
| CG3226      | #N/A | #N/A | - | single   | #N/A     |
| l(1)G0148   | #N/A | #N/A | - | single   | #N/A     |
| CG14442     | #N/A | #N/A | - | #N/A     | single   |
| CG14440     | #N/A | #N/A | - | #N/A     | single   |
| CG4586      | #N/A | #N/A | - | #N/A     | single   |
| CG3040      | #N/A | #N/A | - | #N/A     | single   |
| CG4617      | #N/A | #N/A | - | single   | #N/A     |
| CHES-1-like | #N/A | #N/A | - | #N/A     | single   |
| CG10777     | #N/A | #N/A | - | #N/A     | single   |
| CG15332     | #N/A | #N/A | - | #N/A     | multiple |

|              |      |      |   |          |          |
|--------------|------|------|---|----------|----------|
| CG15330      | #N/A | #N/A | - | #N/A     | multiple |
| CG2233       | #N/A | #N/A | - | single   | #N/A     |
| Ubc-E2H      | #N/A | #N/A | - | #N/A     | single   |
| CG2258       | #N/A | #N/A | - | #N/A     | single   |
| CG15335      | #N/A | #N/A | - | single   | #N/A     |
| CG2116       | #N/A | #N/A | - | single   | #N/A     |
| CG2147       | #N/A | #N/A | - | #N/A     | single   |
| sni          | #N/A | #N/A | - | #N/A     | single   |
| Trxr-1       | #N/A | #N/A | - | #N/A     | single   |
| nAcRalpha-7E | #N/A | #N/A | - | #N/A     | single   |
| Sptr         | #N/A | #N/A | - | single   | #N/A     |
| CG1785       | #N/A | #N/A | - | #N/A     | dense    |
| l(1)G0020    | #N/A | #N/A | - | #N/A     | dense    |
| CG1789       | #N/A | #N/A | - | #N/A     | dense    |
| Bx42         | #N/A | #N/A | - | #N/A     | single   |
| CG7039       | #N/A | #N/A | - | #N/A     | single   |
| CG12057      | #N/A | #N/A | - | #N/A     | dense    |
| CG12056      | #N/A | #N/A | - | #N/A     | dense    |
| CG12106      | #N/A | #N/A | - | #N/A     | dense    |
| CG12118      | #N/A | #N/A | - | #N/A     | dense    |
| su(r)        | #N/A | #N/A | - | #N/A     | dense    |
| BCL7-like    | #N/A | #N/A | - | single   | #N/A     |
| CG32700      | #N/A | #N/A | - | #N/A     | single   |
| CR32690      | #N/A | #N/A | - | #N/A     | single   |
| l(1)G0289    | #N/A | #N/A | - | single   | single   |
| CG32679      | #N/A | #N/A | - | single   | #N/A     |
| hop          | #N/A | #N/A | - | single   | #N/A     |
| Tim8         | #N/A | #N/A | - | single   | #N/A     |
| CG2533       | #N/A | #N/A | - | #N/A     | single   |
| CG2247       | #N/A | #N/A | - | single   | #N/A     |
| CG1703       | #N/A | #N/A | - | single   | #N/A     |
| dy           | #N/A | #N/A | - | single   | #N/A     |
| Hsc70-3      | #N/A | #N/A | - | single   | single   |
| p24-1        | #N/A | #N/A | - | #N/A     | dense    |
| CG10347      | #N/A | #N/A | - | #N/A     | dense    |
| ATP7         | #N/A | #N/A | - | #N/A     | dense    |
| Usp7         | #N/A | #N/A | - | multiple | dense    |
| Cyp311a1     | #N/A | #N/A | - | multiple | dense    |
| Cyp318a1     | #N/A | #N/A | - | #N/A     | dense    |
| CG15734      | #N/A | #N/A | - | #N/A     | single   |
| CR32657      | #N/A | #N/A | - | #N/A     | single   |
| CG42258      | #N/A | #N/A | - | #N/A     | single   |
| CG15729      | #N/A | #N/A | - | #N/A     | single   |
| CG1824       | #N/A | #N/A | - | #N/A     | single   |
| Sec16        | #N/A | #N/A | - | #N/A     | single   |
| sno          | #N/A | #N/A | - | single   | #N/A     |
| REG          | #N/A | #N/A | - | single   | #N/A     |
| CG1764       | #N/A | #N/A | - | single   | #N/A     |
| CG1622       | #N/A | #N/A | - | single   | #N/A     |
| RpS15Aa      | #N/A | #N/A | - | single   | #N/A     |
| CG15747      | #N/A | #N/A | - | single   | #N/A     |
| g            | #N/A | #N/A | - | single   | dense    |
| CG10996      | #N/A | #N/A | - | #N/A     | single   |

|           |      |      |   |          |          |
|-----------|------|------|---|----------|----------|
| Clic      | #N/A | #N/A | - | single   | #N/A     |
| CG11092   | #N/A | #N/A | - | single   | #N/A     |
| CG11584   | #N/A | #N/A | - | #N/A     | single   |
| CG32603   | #N/A | #N/A | - | #N/A     | single   |
| rut       | #N/A | #N/A | - | single   | #N/A     |
| CG5541    | #N/A | #N/A | - | #N/A     | single   |
| CG33177   | #N/A | #N/A | - | #N/A     | dense    |
| CG33178   | #N/A | #N/A | - | #N/A     | dense    |
| CG9065    | #N/A | #N/A | - | #N/A     | dense    |
| CG15027   | #N/A | #N/A | - | #N/A     | dense    |
| CG5599    | #N/A | #N/A | - | #N/A     | dense    |
| CG8191    | #N/A | #N/A | - | #N/A     | dense    |
| CG12379   | #N/A | #N/A | - | #N/A     | dense    |
| l(1)G0136 | #N/A | #N/A | - | #N/A     | dense    |
| Actr13E   | #N/A | #N/A | - | #N/A     | dense    |
| CG11679   | #N/A | #N/A | - | #N/A     | dense    |
| CG8206    | #N/A | #N/A | - | #N/A     | dense    |
| CG8944    | #N/A | #N/A | - | #N/A     | dense    |
| CG8565    | #N/A | #N/A | - | single   | #N/A     |
| CG8931    | #N/A | #N/A | - | #N/A     | dense    |
| CG9172    | #N/A | #N/A | - | #N/A     | dense    |
| eIF5      | #N/A | #N/A | - | #N/A     | dense    |
| exd       | #N/A | #N/A | - | #N/A     | dense    |
| CG8939    | #N/A | #N/A | - | #N/A     | single   |
| vap       | #N/A | #N/A | - | #N/A     | single   |
| CG13957   | #N/A | #N/A | - | single   | #N/A     |
| Cyp1      | #N/A | #N/A | - | multiple | #N/A     |
| CG9917    | #N/A | #N/A | - | single   | #N/A     |
| CG32579   | #N/A | #N/A | - | single   | #N/A     |
| Pp2B-14D  | #N/A | #N/A | - | single   | single   |
| CanA-14F  | #N/A | #N/A | - | #N/A     | single   |
| 41156     | #N/A | #N/A | - | #N/A     | single   |
| CG9059    | #N/A | #N/A | - | #N/A     | single   |
| CG4955    | #N/A | #N/A | - | #N/A     | dense    |
| beta-Spec | #N/A | #N/A | - | #N/A     | single   |
| CG12990   | #N/A | #N/A | - | #N/A     | single   |
| CG32556   | #N/A | #N/A | - | #N/A     | single   |
| e(y)1     | #N/A | #N/A | - | #N/A     | single   |
| CG8142    | #N/A | #N/A | - | #N/A     | single   |
| Ucp4A     | #N/A | #N/A | - | #N/A     | single   |
| CG7990    | #N/A | #N/A | - | #N/A     | single   |
| Ulp1      | #N/A | #N/A | - | #N/A     | single   |
| vav       | #N/A | #N/A | - | #N/A     | dense    |
| CG8010    | #N/A | #N/A | - | #N/A     | dense    |
| CG32537   | #N/A | #N/A | - | #N/A     | dense    |
| gfA       | #N/A | #N/A | - | single   | #N/A     |
| pico      | #N/A | #N/A | - | #N/A     | multiple |
| CG15322   | #N/A | #N/A | - | #N/A     | single   |
| CG42583   | #N/A | #N/A | - | #N/A     | single   |
| CG34332   | #N/A | #N/A | - | #N/A     | single   |
| CG11227   | #N/A | #N/A | - | #N/A     | dense    |
| Ntf-2     | #N/A | #N/A | - | single   | #N/A     |
| M6        | #N/A | #N/A | - | #N/A     | dense    |

---

|     |      |      |   |       |        |
|-----|------|------|---|-------|--------|
| DLP | #N/A | #N/A | - | dense | single |
|-----|------|------|---|-------|--------|

---

**Table S3** Yan putative targets identified in EGFR perturbation microarrays {Butchar, 2012 #120;Jordan, 2005 #121}.

| Gene    | Tissue     | Classification at Stage 5-7 | Classification at Stage 11 |
|---------|------------|-----------------------------|----------------------------|
| Egfr    | Wing       | Dense                       | Dense                      |
| vvl     | Wing       | Multiple                    | Multiple                   |
| sty     | Wing       | Dense                       | Dense                      |
| pnt     | Wing       | Dense                       | Dense                      |
| mask    | Wing       | Single                      | Single                     |
| tou     | Wing       | Dense                       | Dense                      |
| corto   | Wing       | Dense                       | Dense                      |
| Ect3    | Wing/Ovary | Single                      | Not bound                  |
| salm    | Wing       | Dense                       | Dense                      |
| CG4096  | Wing       | Not bound                   | Single                     |
| Cyp1    | Wing       | Dense                       | Dense                      |
| CG6234  | Wing       | Multiple                    | Dense                      |
| eIF5B   | Wing       | Single                      | Multiple                   |
| CG31048 | Wing       | Dense                       | Dense                      |
| Mkp3    | Wing       | Dense                       | Dense                      |
| ppk7    | Wing       | Single                      | Not bound                  |
| CG4165  | Wing       | Multiple                    | Not bound                  |
| CG14470 | Wing       | Single                      | Not bound                  |
| veli    | Wing       | Single                      | Not bound                  |
| cv-2    | Wing       | Multiple                    | Dense                      |
| SRm160  | Wing       | Single                      | Not bound                  |
| dikar   | Wing       | Single                      | Single                     |
| Cdc37   | Wing       | Not bound                   | Single                     |
| DMAP1   | Wing       | Multiple                    | Multiple                   |
| sec63   | Wing       | Not bound                   | Single                     |
| CG17370 | Wing       | Multiple                    | Multiple                   |
| aralar1 | Wing       | Single                      | Single                     |
| Fhos    | Wing       | Single                      | Single                     |

|           |            |           |           |
|-----------|------------|-----------|-----------|
| dro6      | Wing       | Single    | Single    |
| CG11127   | Wing       | Single    | Not bound |
| Strn-Mlck | Wing       | Dense     | Not bound |
| Tm1       | Wing/Ovary | Multiple  | Single    |
| CG8111    | Wing       | Multiple  | Not bound |
| Eip71CD   | Wing       | Single    | Not bound |
| DAAM      | Wing       | Not bound | Multiple  |
| CG14903   | Wing       | Single    | Not bound |
| CG3788    | Wing       | Not bound | Single    |
| Gip       | Wing       | Not bound | Single    |
| wun2      | Wing       | Not bound | Single    |
| CG8788    | Wing       | Multiple  | Single    |
| Cpr64Aa   | Wing       | Not bound | Single    |
| CG9331    | Wing/Ovary | Single    | Single    |
| CG2444    | Wing       | Single    | Not bound |
| CG9027    | Wing/Ovary | Single    | Single    |
| CG4382    | Wing       | Single    | Single    |
| MESK2     | Ovary      | Single    | Not bound |
| Sara      | Ovary      | Single    | Not bound |
| RhoGAP68  | Ovary      | Single    | Not bound |
| Plc21C    | Ovary      | Not bound | Single    |
| RhoGAP19  | Ovary      | Single    | Not bound |
| Stat92E   | Ovary      | Multiple  | Multiple  |
| ImpL2     | Ovary      | Dense     | Dense     |
| mth       | Ovary      | Single    | Single    |
| POSH      | Ovary      | Not bound | Single    |
| CG7447    | Ovary      | Single    | Not bound |
| CBP       | Ovary      | Single    | Dense     |
| sdk       | Ovary      | Single    | Multiple  |
| ara       | Ovary      | Single    | Multiple  |



---

|            |       |           |           |
|------------|-------|-----------|-----------|
| CG6197     | Ovary | Single    | Single    |
| Dp         | Ovary | Single    | Dense     |
| Rel        | Ovary | Not bound | Single    |
| cg         | Ovary | Single    | Single    |
| Gpdh       | Ovary | Not bound | Single    |
| CG4455     | Ovary | Single    | Not bound |
| Hph        | Ovary | Single    | Multiple  |
| woc        | Ovary | Single    | Not bound |
| CG6509     | Ovary | Single    | Single    |
| CG17486    | Ovary | Single    | Not bound |
| CG1640     | Ovary | Single    | Single    |
| CG10962    | Ovary | Multiple  | Multiple  |
| sgl        | Ovary | Single    | Multiple  |
| Adar       | Ovary | Single    | Single    |
| Psa        | Ovary | Multiple  | Multiple  |
| CG8814     | Ovary | Single    | Not bound |
| Cyp6a22    | Ovary | Single    | Not bound |
| Nup98      | Ovary | Multiple  | Dense     |
| sll        | Ovary | Not bound | Single    |
| alpha-Spec | Ovary | Not bound | Single    |
| CG10077    | Ovary | Single    | Single    |
| polo       | Ovary | Single    | Single    |
| CG3764     | Ovary | Not bound | Single    |
| CG7222     | Ovary | Single    | Single    |
| CG7800     | Ovary | Not bound | Dense     |
| CG6983     | Ovary | Multiple  | Single    |
| CG11399    | Ovary | Single    | Single    |
| CG3563     | Ovary | Multiple  | Multiple  |
| CG3106     | Ovary | Single    | Single    |
| Mes2       | Ovary | Not bound | Dense     |

---

|          |       |           |           |
|----------|-------|-----------|-----------|
| Gdi      | Ovary | Not bound | Single    |
| Glt      | Ovary | Single    | Not bound |
| Hml      | Ovary | Single    | Single    |
| Eip75B   | Ovary | Multiple  | Dense     |
| Dr       | Ovary | Single    | Dense     |
| noc      | Ovary | Dense     | Dense     |
| NK7.1    | Ovary | Single    | Not bound |
| I(3)mbt  | Ovary | Single    | Not bound |
| CG8443   | Ovary | Not bound | Single    |
| ras      | Ovary | Single    | Dense     |
| CG10932  | Ovary | Not bound | Dense     |
| Prat2    | Ovary | Not bound | Single    |
| fng      | Ovary | Not bound | Multiple  |
| Oscillin | Ovary | Multiple  | Not bound |
| CG1518   | Ovary | Dense     | Dense     |
| CG12264  | Ovary | Dense     | Dense     |
| CG17273  | Ovary | Not bound | Single    |
| CG12375  | Ovary | Single    | Single    |
| SdhB     | Ovary | Single    | Not bound |
| c(3)G    | Ovary | Single    | Not bound |
| mnd      | Ovary | Single    | Not bound |
| snapin   | Ovary | Dense     | Dense     |
| shi      | Ovary | Multiple  | Not bound |
| I(1)1Bi  | Ovary | Single    | Not bound |
| bl       | Ovary | Multiple  | Dense     |
| Lola     | Ovary | Multiple  | Dense     |
| Ddx1     | Ovary | Single    | Single    |
| Top3beta | Ovary | Single    | Single    |
| CG5325   | Ovary | Single    | Not bound |
| how      | Ovary | Single    | Not bound |

---

|           |       |           |           |
|-----------|-------|-----------|-----------|
| Nek2      | Ovary | Single    | Dense     |
| CG5147    | Ovary | Single    | Not bound |
| CG18004   | Ovary | Single    | Not bound |
| CG6959    | Ovary | Multiple  | Single    |
| CG9526    | Ovary | Single    | Not bound |
| CG11395   | Ovary | Not bound | Single    |
| CG4329    | Ovary | Single    | Not bound |
| CG7810    | Ovary | Not bound | Single    |
| CG18616   | Ovary | Single    | Single    |
| CG3548    | Ovary | Single    | Not bound |
| CG11470   | Ovary | Single    | Multiple  |
| CG6194    | Ovary | Single    | Single    |
| CG4853    | Ovary | Multiple  | Not bound |
| gp210     | Ovary | Single    | Not bound |
| rho       | Ovary | Dense     | Dense     |
| bt        | Ovary | Multiple  | Single    |
| Arp14D    | Ovary | Not bound | Single    |
| me31B     | Ovary | Not bound | Single    |
| kis       | Ovary | Multiple  | Dense     |
| Ptp4E     | Ovary | Single    | Dense     |
| PhKgamma  | Ovary | Single    | Not bound |
| CG15118   | Ovary | Multiple  | Multiple  |
| Drl-2     | Ovary | Single    | Not bound |
| Rrp4      | Ovary | Single    | Not bound |
| mod(mdg4) | Ovary | Multiple  | Single    |
| CG6094    | Ovary | Single    | Single    |
| Aats-phe  | Ovary | Single    | Single    |
| CG5037    | Ovary | Single    | Single    |
| SamDC     | Ovary | Single    | Not bound |
| CG5382    | Ovary | Single    | Not bound |

---

---

|               |              |                  |                  |
|---------------|--------------|------------------|------------------|
| <b>CG8297</b> | <b>Ovary</b> | <b>Not bound</b> | <b>Single</b>    |
| <b>CG3919</b> | <b>Ovary</b> | <b>Single</b>    | <b>Not bound</b> |

---

**Table S4 Yan binding is dynamic across the segmentation network.** Gene expression profiles of Yan putative targets available from the Berkley Drosophila Genome Project {Tomancak, 2007 #122;Tomancak, 2002 #123}.

| Gene | Stage bound by Yan | Classification of Yan binding | Dynamic CHIP pattern? | Gene expression in early embryogenesis                                                            | Gene expression in late embryogenesis                                                                                   |
|------|--------------------|-------------------------------|-----------------------|---------------------------------------------------------------------------------------------------|-------------------------------------------------------------------------------------------------------------------------|
| bcd  | Stg5-7 and Stg11   | multiple->dense               | yes                   | maternal/foregut and ant endoderm stg4-6                                                          | no staining detected                                                                                                    |
| osk  | Stg5-7             | Dense                         | yes                   | maternal/pole cell rapidly degraded stg4-6                                                        | no staining detected                                                                                                    |
| hb   | Stg5-7 and Stg11   | dense                         | yes                   | maternal/foregut, hindgut, vent ectoderm, dors ectoderm, procephalic ectoderm, mesectoderm stg4-6 | central brain glia, neuroblasts of vent nervous sys, procephalic neuroblasts, vent nerve cord, brain, lateral cord glia |
| pum  | Stg5-7 and Stg11   | multiple                      | yes                   | -                                                                                                 | -                                                                                                                       |
| hkb  | Stg5-7 and Stg11   | dense->multiple               | yes                   | foregut, ant endoderm, post endoderm, procephalic ectoderm                                        | central brain glia, vent nervous sys, brain, salivary gland body                                                        |
| til  | Stg5-7 and Stg11   | dense->multiple               | yes                   | -                                                                                                 | -                                                                                                                       |
| ems  | Stg5-7 and         | single->dense                 | yes                   | -                                                                                                 | -                                                                                                                       |

---

|            |                         |                           |            |                                                                                                                           |                                                                                                               |
|------------|-------------------------|---------------------------|------------|---------------------------------------------------------------------------------------------------------------------------|---------------------------------------------------------------------------------------------------------------|
|            | <b>Stg11</b>            |                           |            |                                                                                                                           |                                                                                                               |
| <b>btd</b> | <b>Stg5-7 and Stg11</b> | <b>multiple</b>           | <b>yes</b> | <b>head epidermis, clypeolabrun, dors ectoderm, cellular blastoderm, hypopharynx, central brain, procephalic ectoderm</b> | <b>vent epidermis, procephalic, neuroblasts, head epidermis, brain, vent nerve cord, pars intercerebralis</b> |
| <b>Kr</b>  | <b>Stg5-7 and Stg11</b> | <b>dense</b>              | <b>yes</b> | <b>visual, hindgut, vent ectoderm, procephalic ectoderm, dors ectoderm, post endoderm</b>                                 | <b>Malpighian tubule, larval eye, brain, stomatogastric nervous sys, vent nerve cord</b>                      |
| <b>kni</b> | <b>Stg5-7 and Stg11</b> | <b>dense-&gt;multiple</b> | <b>yes</b> | <b>-</b>                                                                                                                  | <b>-</b>                                                                                                      |
| <b>gt</b>  | <b>stg5-7</b>           | <b>dense</b>              | <b>yes</b> | <b>maternal/mesoderm, dors ectoderm, ectoderm, cellular blastoderm, vent ectoderm, procephalic ectoderm stg 4-6</b>       | <b>procrystal cell plasmatocytes, procephalon</b>                                                             |
| <b>csw</b> | <b>Stg5-7 and Stg11</b> | <b>dense</b>              | <b>no</b>  | <b>maternal</b>                                                                                                           | <b>no staining detected</b>                                                                                   |
| <b>twi</b> | <b>Stg5-7 and Stg11</b> | <b>dense</b>              | <b>yes</b> | <b>cellular blastoderm, ant endoderm, mesoderm</b>                                                                        | <b>trunk mesoderm</b>                                                                                         |
| <b>sna</b> | <b>Stg5-7 and Stg11</b> | <b>dense</b>              | <b>yes</b> | <b>ant endoderm, mesoderm</b>                                                                                             | <b>lateral cord neuron, central brain glia, procephalic</b>                                                   |

---

---

|      |                     |                 |     |                                                                  |   |                                                                                                                                                                     |
|------|---------------------|-----------------|-----|------------------------------------------------------------------|---|---------------------------------------------------------------------------------------------------------------------------------------------------------------------|
|      |                     |                 |     |                                                                  |   | neuroblasts,<br>brain, lateral<br>cord glia,<br>neuroblasts of<br>vent nervous<br>sys, midline,<br>oocyte, vent<br>sensory<br>complex, vent<br>nerve cord           |
| dpp  | Stg5-7 and<br>Stg11 | dense           | yes |                                                                  |   |                                                                                                                                                                     |
| capu | Stg5-7 and<br>Stg11 | single          | no  | maternal/no staining                                             |   | hindgut proper,<br>dors epidermis,<br>foregut                                                                                                                       |
| spir | stg11               | single          | yes | maternal/ubiquitous                                              |   | hindgut proper,<br>vent epidermis,<br>foregut, post<br>midgut, vent<br>imaginal<br>precursor,<br>rectum, labral<br>sensory<br>complex,<br>clypeo-labral,<br>gnathal |
| gd   | stg5-7              | single          | yes | -                                                                | - |                                                                                                                                                                     |
| Tl   | Stg5-7 and<br>Stg11 | multiple->dense | yes | -                                                                | - |                                                                                                                                                                     |
| h    | Stg5-7 and<br>Stg11 | dense->single   | yes | hypopharynx, vent<br>ectoderm,<br>clypeolabrum, dors<br>ectoderm |   | hindgut proper,<br>hypopharynx,<br>dors epidermis,<br>clypeo-labral                                                                                                 |

---

---

|     |                     |                 |     |                                                                                                   |                                                                                                                                                                                                                                    |
|-----|---------------------|-----------------|-----|---------------------------------------------------------------------------------------------------|------------------------------------------------------------------------------------------------------------------------------------------------------------------------------------------------------------------------------------|
| eve | Stg5-7 and<br>Stg11 | dense->single   | yes | vent ectoderm, dors<br>ectoderm,<br>mesoderm                                                      | cardiac<br>mesoderm, anal<br>pad, vent nerve<br>cord                                                                                                                                                                               |
| run | Stg5-7 and<br>Stg11 | dense->multiple | yes | hindgut, mesoderm,<br>dors ectoderm, vent<br>ectoderm,<br>procephalic<br>ectoderm                 | vent epidermis,<br>procephalic<br>neuroblasts,<br>brain,<br>neuroblasts of<br>vent nervous<br>sys, vent<br>sensory<br>complex, vent<br>nerve cord,<br>central brain<br>neuron                                                      |
| ftz | Stg5-7 and<br>Stg11 | dense->single   | yes | faint ubiquitous/vent<br>ectoderm, dors<br>ectoderm                                               | midline, vent<br>nerve cord                                                                                                                                                                                                        |
| odd | Stg5-7 and<br>Stg11 | dense           | yes | foregut, mesoderm,<br>dors ectoderm,<br>mesectoderm, vent<br>ectoderm,<br>procephalic<br>ectoderm | proventriculus,<br>vent epidermis,<br>pericardial cell,<br>Malpighian<br>tubule, dors<br>epidermis,<br>foregut, cardiac<br>mesoderm,<br>lymph gland,<br>labral sensory<br>complex,<br>atrium, fat<br>body/gonad,<br>clypeo-labral, |

---



---

|       |                     |                 |     |                                                                                                  | dors apodeme                                                                                   |
|-------|---------------------|-----------------|-----|--------------------------------------------------------------------------------------------------|------------------------------------------------------------------------------------------------|
| slp1  | Stg5-7 and<br>Stg11 | multiple->dense | yes | cellular blastoderm,<br>vent ectoderm,<br>mesoderm, dors<br>ectoderm,<br>procephalic<br>ectoderm | procrystal cell,<br>vent epidermis,<br>dors epidermis,<br>midline, clypeo-<br>labral, antennal |
| slp2  | Stg5-7 and<br>Stg11 | single->dense   | yes | ectoderm, vent<br>ectoderm,<br>procephalic<br>ectoderm, dors<br>ectoderm,<br>mesectoderm         | vent epidermis,<br>vent midline,<br>clypeo-labral,<br>brain                                    |
| prd   | Stg5-7              | dense           | yes | trunk mesoderm,<br>vent ectoderm, dors<br>ectoderm                                               | vent ectoderm,<br>clypeolabrum                                                                 |
| opa   | Stg5-7 and<br>Stg11 | both            | no  | maternal/ubiquitous<br>stg4-6                                                                    | faint ubiquitous                                                                               |
| Ubx   | Stg5-7 and<br>Stg11 | dense->multiple | yes | cellular blastoderm,<br>vent ectoderm,<br>mesoderm, dors<br>ectoderm,<br>mesectoderm             | trunk<br>mesoderm, vent<br>nerve cord                                                          |
| abd-A | Stg5-7 and<br>Stg11 | dense           | yes | maternal/yolk stg4-6                                                                             | trunk<br>mesoderm, vent<br>epidermis, dors<br>epidermis, vent<br>nerve cord                    |

---

|       |                     |                 |     |                                                                                                     |                                                                                                                                                                           |
|-------|---------------------|-----------------|-----|-----------------------------------------------------------------------------------------------------|---------------------------------------------------------------------------------------------------------------------------------------------------------------------------|
| Abd-B | Stg5-7 and<br>Stg11 | multiple->dense | yes | vent ectoderm,<br>mesoderm, dors<br>ectoderm                                                        | trunk<br>mesoderm, vent<br>epidermis, vent<br>nerve cord, dors<br>ectoderm                                                                                                |
| Antp  | Stg5-7 and<br>Stg11 | multiple->dense | yes | cellular blastoderm,<br>vent ectoderm, dors<br>ectoderm                                             | lateral cord<br>neuron, vent<br>epidermis,<br>neuroblasts of<br>vent nervous<br>sys, lateral cord<br>glia                                                                 |
| en    | Stg5-7 and<br>Stg11 | dense           | yes | cellular blastoderm,<br>vent ectoderm,<br>mesoderm, dors<br>ectoderm,<br>mesectoderm                | hindgut proper,<br>vent epidermis,<br>head epidermis,<br>brain, somatic<br>muscle, midline,<br>atrium, clypeo-<br>labral, vent<br>nerve cord,<br>lateral cord,<br>gnathal |
| nkd   | Stg5-7 and<br>Stg11 | dense           | no  |                                                                                                     |                                                                                                                                                                           |
| arm   | Stg5-7 and<br>Stg11 | single          | no  | maternal                                                                                            | ubiquitous                                                                                                                                                                |
| gsb   | Stg5-7 and<br>Stg11 | single->dense   | yes | hypopharynx,<br>cellular blastoderm,<br>vent ectoderm, dors<br>ectoderm,<br>procephalic<br>ectoderm | vent ectoderm,<br>hypopharynx,<br>dors ectoderm,<br>antennal                                                                                                              |

---

|              |                             |                            |            |                                                                                                                                                 |                                                                                                                                                                                         |
|--------------|-----------------------------|----------------------------|------------|-------------------------------------------------------------------------------------------------------------------------------------------------|-----------------------------------------------------------------------------------------------------------------------------------------------------------------------------------------|
| <b>gsb-n</b> | <b>Stg5-7 and<br/>Stg11</b> | <b>single-&gt;multiple</b> | <b>yes</b> | <b>no staining detected</b>                                                                                                                     | <b>atrium, vent<br/>nerve cord,<br/>brain, somatic<br/>muscle</b>                                                                                                                       |
| <b>hh</b>    | <b>Stg5-7 and<br/>Stg11</b> | <b>dense</b>               | <b>yes</b> | <b>-</b>                                                                                                                                        | <b>-</b>                                                                                                                                                                                |
| <b>wg</b>    | <b>Stg5-7 and<br/>Stg11</b> | <b>dense</b>               | <b>no</b>  | <b>visual, foregut,<br/>hindgut, mesderm,<br/>dors ectoderm,<br/>mesectoderm,<br/>ectoderm, vent<br/>ectoderm,<br/>procephalic<br/>ectoderm</b> | <b>proventriculus,<br/>hindgut proper,<br/>vent epidermis,<br/>dors epidermis,<br/>visceral muscle,<br/>foregut, brain,<br/>cardiac<br/>mesoderm,<br/>optic lobe,<br/>clypeo-labral</b> |
| <b>ptc</b>   | <b>Stg5-7 and<br/>Stg11</b> | <b>dense</b>               | <b>no</b>  | <b>-</b>                                                                                                                                        | <b>-</b>                                                                                                                                                                                |

---

**Table S5 GO analysis of Yan datasets.** DAVID was used to perform GO analysis of Genes assigned to Yan-bound regions at stage 5-7 (A) and stage 11 (B) and of genes assigned to Yan-bound regions in the *D. virilis* datasets (C) {Huang, 2009 #62;Huang, 2009 #63}. Only clusters that contain a GO-term with a p-value <0.0001 (Bonferroni-corrected) are shown.

| <b>A. Stg5-7 Top 2000 genes +/- 3kb from Yan bound region</b> |                                                            |                 |            |
|---------------------------------------------------------------|------------------------------------------------------------|-----------------|------------|
| Cluster 1                                                     |                                                            |                 |            |
| Category                                                      | Term                                                       | Fold Enrichment | Bonferroni |
| SP_PIR_KEYWORDS                                               | dna-binding                                                | 3.078305244     | 5.24E-43   |
| GOTERM_MF_FAT                                                 | GO:0030528~transcription regulator activity                | 2.370622284     | 1.05E-39   |
| GOTERM_BP_FAT                                                 | GO:0045449~regulation of transcription                     | 2.189821722     | 3.88E-35   |
| GOTERM_MF_FAT                                                 | GO:0003700~transcription factor activity                   | 2.806327586     | 3.38E-35   |
| GOTERM_BP_FAT                                                 | GO:0051252~regulation of RNA metabolic process             | 2.258051786     | 3.74E-32   |
| GOTERM_BP_FAT                                                 | GO:0006355~regulation of transcription, DNA-dependent      | 2.317119826     | 3.98E-31   |
| GOTERM_MF_FAT                                                 | GO:0003677~DNA binding                                     | 2.039477281     | 1.62E-29   |
| SP_PIR_KEYWORDS                                               | transcription regulation                                   | 2.67305822      | 1.38E-26   |
| SP_PIR_KEYWORDS                                               | nucleus                                                    | 2.033269269     | 2.54E-26   |
| SP_PIR_KEYWORDS                                               | Transcription                                              | 2.516967229     | 1.62E-22   |
| GOTERM_MF_FAT                                                 | GO:0043565~sequence-specific DNA binding                   | 2.823780256     | 7.62E-20   |
| GOTERM_BP_FAT                                                 | GO:0006350~transcription                                   | 2.13651513      | 1.56E-16   |
| GOTERM_MF_FAT                                                 | GO:0003702~RNA polymerase II transcription factor activity | 2.500234278     | 2.18E-15   |
| Cluster 2                                                     |                                                            |                 |            |
| Category                                                      | Term                                                       | Fold Enrichment | Bonferroni |
| GOTERM_BP_FAT                                                 | GO:0007444~imaginal disc development                       | 2.50011219      | 3.11E-25   |
| GOTERM_BP_FAT                                                 | GO:0048569~post-embryonic organ development                | 2.779286195     | 4.18E-24   |
| GOTERM_BP_FAT                                                 | GO:0009791~post-embryonic development                      | 2.389634409     | 4.34E-23   |
| GOTERM_BP_FAT                                                 | GO:0007552~metamorphosis                                   | 2.51411418      | 4.13E-22   |
| GOTERM_BP_FAT                                                 | GO:0009886~post-embryonic morphogenesis                    | 2.478282657     | 1.76E-20   |
| GOTERM_BP_FAT                                                 | GO:0048707~instar larval or pupal morphogenesis            | 2.480471342     | 3.91E-20   |
| GOTERM_BP_FAT                                                 | GO:0007560~imaginal disc morphogenesis                     | 2.658087637     | 6.17E-20   |
| GOTERM_BP_FAT                                                 | GO:0048563~post-embryonic organ morphogenesis              | 2.658087637     | 6.17E-20   |
| GOTERM_BP_FAT                                                 | GO:0002165~instar larval or pupal development              | 2.312321106     | 9.87E-20   |
| GOTERM_BP_FAT                                                 | GO:0035107~appendage morphogenesis                         | 2.623801653     | 7.57E-16   |
| GOTERM_BP_FAT                                                 | GO:0035114~imaginal disc-derived appendage morphogenesis   | 2.627217108     | 1.11E-15   |
| GOTERM_BP_FAT                                                 | GO:0048736~appendage development                           | 2.581138211     | 2.60E-15   |

|               |                                                        |             |          |
|---------------|--------------------------------------------------------|-------------|----------|
| GOTERM_BP_FAT | GO:0048737~imaginal disc-derived appendage development | 2.583970736 | 3.81E-15 |
| GOTERM_BP_FAT | GO:0035220~wing disc development                       | 2.385179913 | 1.04E-13 |
| GOTERM_BP_FAT | GO:0035120~post-embryonic appendage morphogenesis      | 2.557092673 | 1.27E-13 |
| GOTERM_BP_FAT | GO:0007476~imaginal disc-derived wing morphogenesis    | 2.45958002  | 4.60E-11 |
| GOTERM_BP_FAT | GO:0007472~wing disc morphogenesis                     | 2.437220202 | 8.01E-11 |

#### Cluster 3

| Category      | Term                                                             | Fold Enrichment | Bonferroni |
|---------------|------------------------------------------------------------------|-----------------|------------|
| GOTERM_BP_FAT | GO:0030182~neuron differentiation                                | 2.535700081     | 3.46E-26   |
| GOTERM_BP_FAT | GO:0000902~cell morphogenesis                                    | 2.346383107     | 3.62E-22   |
| GOTERM_BP_FAT | GO:0048666~neuron development                                    | 2.521134806     | 3.07E-21   |
| GOTERM_BP_FAT | GO:0006928~cell motion                                           | 2.567597814     | 2.17E-19   |
| GOTERM_BP_FAT | GO:0032989~cellular component morphogenesis                      | 2.124705277     | 1.01E-18   |
| GOTERM_BP_FAT | GO:0030030~cell projection organization                          | 2.377475799     | 1.62E-18   |
| GOTERM_BP_FAT | GO:0048667~cell morphogenesis involved in neuron differentiation | 2.547679012     | 1.13E-17   |
| GOTERM_BP_FAT | GO:0048812~neuron projection morphogenesis                       | 2.540826729     | 2.25E-17   |
| GOTERM_BP_FAT | GO:0031175~neuron projection development                         | 2.531973674     | 3.02E-17   |
| GOTERM_BP_FAT | GO:0000904~cell morphogenesis involved in differentiation        | 2.468124679     | 6.98E-17   |
| GOTERM_BP_FAT | GO:0048858~cell projection morphogenesis                         | 2.403147222     | 1.92E-16   |
| GOTERM_BP_FAT | GO:0032990~cell part morphogenesis                               | 2.344598859     | 1.05E-15   |
| GOTERM_BP_FAT | GO:0007409~axonogenesis                                          | 2.779286195     | 5.04E-15   |
| GOTERM_BP_FAT | GO:0007411~axon guidance                                         | 3.11254902      | 1.33E-13   |

#### Cluster 4

| Category        | Term                                     | Fold Enrichment | Bonferroni |
|-----------------|------------------------------------------|-----------------|------------|
| GOTERM_MF_FAT   | GO:0043565~sequence-specific DNA binding | 2.823780256     | 7.62E-20   |
| SP_PIR_KEYWORDS | Homeobox                                 | 3.920660491     | 6.63E-18   |
| INTERPRO        | IPR017970:Homeobox, conserved site       | 3.893088965     | 1.32E-16   |
| INTERPRO        | IPR001356:Homeobox                       | 3.773448411     | 3.45E-16   |
| INTERPRO        | IPR012287:Homeodomain-related            | 3.562543676     | 1.86E-14   |
| SMART           | SM00389:HOX                              | 3.009109526     | 9.59E-13   |
| UP_SEQ_FEATURE  | DNA-binding region:Homeobox              | 3.67965368      | 2.06E-10   |

#### Cluster 5

| Category      | Term              | Fold Enrichment | Bonferroni |
|---------------|-------------------|-----------------|------------|
| GOTERM_BP_FAT | GO:0048729~tissue | 2.856320288     | 3.54E-21   |

|               |                                 |                 |            |
|---------------|---------------------------------|-----------------|------------|
|               | morphogenesis                   |                 |            |
|               | GO:0048598~embryonic            |                 |            |
| GOTERM_BP_FAT | morphogenesis                   | 2.934426745     | 1.01E-20   |
|               | GO:0002009~morphogenesis of     |                 |            |
| GOTERM_BP_FAT | an epithelium                   | 2.727976296     | 1.77E-16   |
|               | GO:0060429~epithelium           |                 |            |
| GOTERM_BP_FAT | development                     | 2.671935697     | 3.11E-16   |
|               | GO:0016331~morphogenesis of     |                 |            |
| GOTERM_BP_FAT | embryonic epithelium            | 2.93962963      | 1.26E-09   |
| GOTERM_BP_FAT | GO:0007391~dorsal closure       | 3.044837427     | 5.70E-08   |
|               | GO:0001700~embryonic            |                 |            |
| GOTERM_BP_FAT | development via the syncytial   |                 |            |
|               | blastoderm                      | 2.175875389     | 1.29E-06   |
|               | GO:0009792~embryonic            |                 |            |
| GOTERM_BP_FAT | development ending in birth or  |                 |            |
|               | egg hatching                    | 2.110234127     | 3.88E-06   |
| Cluster 6     |                                 |                 |            |
| Category      | Term                            | Fold Enrichment | Bonferroni |
|               | GO:0048732~gland                |                 |            |
| GOTERM_BP_FAT | development                     | 2.943236537     | 2.99E-14   |
|               | GO:0007431~salivary gland       |                 |            |
| GOTERM_BP_FAT | development                     | 2.943859313     | 1.20E-11   |
|               | GO:0035272~exocrine system      |                 |            |
| GOTERM_BP_FAT | development                     | 2.943859313     | 1.20E-11   |
|               | GO:0007435~salivary gland       |                 |            |
| GOTERM_BP_FAT | morphogenesis                   | 2.475477583     | 1.18E-04   |
|               | GO:0022612~gland                |                 |            |
| GOTERM_BP_FAT | morphogenesis                   | 2.475477583     | 1.18E-04   |
| Cluster 7     |                                 |                 |            |
| Category      | Term                            | Fold Enrichment | Bonferroni |
|               | GO:0007423~sensory organ        |                 |            |
| GOTERM_BP_FAT | development                     | 2.305816802     | 4.26E-19   |
| GOTERM_BP_FAT | GO:0001654~eye development      | 2.188784471     | 4.86E-12   |
|               | GO:0048749~compound eye         |                 |            |
| GOTERM_BP_FAT | development                     | 2.130277056     | 7.99E-10   |
|               | GO:0046530~photoreceptor        |                 |            |
| GOTERM_BP_FAT | cell differentiation            | 2.755902778     | 2.19E-08   |
|               | GO:0001751~compound eye         |                 |            |
| GOTERM_BP_FAT | photoreceptor cell              |                 |            |
|               | differentiation                 | 2.733061061     | 1.05E-06   |
|               | GO:0001754~eye                  |                 |            |
| GOTERM_BP_FAT | photoreceptor cell              |                 |            |
|               | differentiation                 | 2.676076628     | 1.39E-06   |
|               | GO:0048592~eye                  |                 |            |
| GOTERM_BP_FAT | morphogenesis                   | 2.019492772     | 1.86E-06   |
|               | GO:0001745~compound eye         |                 |            |
| GOTERM_BP_FAT | morphogenesis                   | 1.947210667     | 8.06E-05   |
| Cluster 8     |                                 |                 |            |
| Category      | Term                            | Fold Enrichment | Bonferroni |
| GOTERM_BP_FAT | GO:0006928~cell motion          | 2.567597814     | 2.17E-19   |
| GOTERM_BP_FAT | GO:0016477~cell migration       | 2.53984         | 2.10E-09   |
| GOTERM_BP_FAT | GO:0048870~cell motility        | 2.376855615     | 5.67E-08   |
| GOTERM_BP_FAT | GO:0051674~localization of cell | 2.303709751     | 1.74E-07   |
| Cluster 9     |                                 |                 |            |

| Category      | Term                                                                        | Fold Enrichment | Bonferroni |
|---------------|-----------------------------------------------------------------------------|-----------------|------------|
| GOTERM_BP_FAT | GO:0007155~cell adhesion                                                    | 2.635530013     | 1.19E-10   |
| GOTERM_BP_FAT | GO:0022610~biological adhesion                                              | 2.439267139     | 7.06E-09   |
| GOTERM_BP_FAT | GO:0016337~cell-cell adhesion                                               | 3.228610169     | 5.98E-05   |
| Cluster 10    |                                                                             |                 |            |
| Category      | Term                                                                        | Fold Enrichment | Bonferroni |
| GOTERM_BP_FAT | GO:0048645~organ formation                                                  | 5.291333333     | 2.86E-13   |
| GOTERM_BP_FAT | GO:0010160~formation of organ boundary                                      | 5.198502924     | 5.72E-12   |
| GOTERM_BP_FAT | GO:0048859~formation of anatomical boundary                                 | 4.81030303      | 1.20E-11   |
| GOTERM_BP_FAT | GO:0008052~sensory organ boundary specification                             | 4.907903382     | 7.00E-05   |
| GOTERM_BP_FAT | GO:0007432~salivary gland boundary specification                            | 5.644088889     | 8.93E-04   |
| Cluster 11    |                                                                             |                 |            |
| Category      | Term                                                                        | Fold Enrichment | Bonferroni |
| GOTERM_BP_FAT | GO:0007169~transmembrane receptor protein tyrosine kinase signaling pathway | 3.04211213      | 1.59E-09   |
| GOTERM_BP_FAT | GO:0007167~enzyme linked receptor protein signaling pathway                 | 2.724732567     | 1.76E-09   |
| GOTERM_BP_FAT | GO:0007173~epidermal growth factor receptor signaling pathway               | 3.919506173     | 1.29E-04   |
| Cluster 12    |                                                                             |                 |            |
| Category      | Term                                                                        | Fold Enrichment | Bonferroni |
| GOTERM_BP_FAT | GO:0007389~pattern specification process                                    | 2.410496296     | 9.73E-27   |
| GOTERM_BP_FAT | GO:0003002~regionalization                                                  | 2.424223201     | 1.56E-25   |
| GOTERM_BP_FAT | GO:0009880~embryonic pattern specification                                  | 2.412786917     | 4.35E-11   |
| GOTERM_BP_FAT | GO:0035282~segmentation                                                     | 2.306478632     | 7.21E-11   |
| GOTERM_BP_FAT | GO:0007350~blastoderm segmentation                                          | 2.427217125     | 1.54E-10   |
| GOTERM_BP_FAT | GO:0007354~zygotic determination of anterior/posterior axis, embryo         | 4.379034483     | 8.19E-05   |
| Cluster 13    |                                                                             |                 |            |
| Category      | Term                                                                        | Fold Enrichment | Bonferroni |
| GOTERM_BP_FAT | GO:0014016~neuroblast differentiation                                       | 5.291333333     | 2.33E-08   |
| GOTERM_BP_FAT | GO:0014017~neuroblast fate commitment                                       | 5.22600823      | 1.20E-07   |
| GOTERM_BP_FAT | GO:0007400~neuroblast fate determination                                    | 5.07968         | 3.00E-06   |
| GOTERM_BP_FAT | GO:0007419~ventral cord development                                         | 4.096516129     | 3.16E-04   |
| Cluster 14    |                                                                             |                 |            |
| Category      | Term                                                                        | Fold Enrichment | Bonferroni |
| GOTERM_BP_FAT | GO:0048565~gut development                                                  | 3.962459665     | 8.58E-13   |

|               |                                          |             |          |
|---------------|------------------------------------------|-------------|----------|
| GOTERM_BP_FAT | GO:0035239~tube morphogenesis            | 3.191597884 | 6.47E-08 |
| GOTERM_BP_FAT | GO:0048567~ectodermal gut morphogenesis  | 3.680927536 | 1.95E-05 |
| GOTERM_BP_FAT | GO:0007439~ectodermal gut development    | 3.680927536 | 1.95E-05 |
| GOTERM_BP_FAT | GO:0048547~gut morphogenesis             | 3.602609929 | 3.32E-05 |
| GOTERM_BP_FAT | GO:0055123~digestive system development  | 3.527555556 | 5.53E-05 |
| GOTERM_BP_FAT | GO:0048546~digestive tract morphogenesis | 3.527555556 | 5.53E-05 |
| GOTERM_BP_FAT | GO:0007442~hindgut morphogenesis         | 3.527555556 | 5.28E-04 |

Cluster 15

| Category      | Term                                                                                                    | Fold Enrichment | Bonferroni |
|---------------|---------------------------------------------------------------------------------------------------------|-----------------|------------|
| GOTERM_MF_FAT | GO:0016564~transcription repressor activity                                                             | 3.422930977     | 1.06E-14   |
| GOTERM_BP_FAT | GO:0006357~regulation of transcription from RNA polymerase II promoter                                  | 2.682412037     | 8.58E-13   |
| GOTERM_BP_FAT | GO:0000122~negative regulation of transcription from RNA polymerase II promoter                         | 3.469726776     | 1.00E-06   |
| GOTERM_BP_FAT | GO:0010558~negative regulation of macromolecule biosynthetic process                                    | 1.978872629     | 3.99E-05   |
| GOTERM_BP_FAT | GO:0009890~negative regulation of biosynthetic process                                                  | 1.95503079      | 6.78E-05   |
| GOTERM_BP_FAT | GO:0031327~negative regulation of cellular biosynthetic process                                         | 1.95503079      | 6.78E-05   |
| GOTERM_BP_FAT | GO:0016481~negative regulation of transcription                                                         | 1.976794418     | 6.84E-04   |
| GOTERM_BP_FAT | GO:0051172~negative regulation of nitrogen compound metabolic process                                   | 1.929873443     | 7.99E-04   |
| GOTERM_BP_FAT | GO:0045934~negative regulation of nucleobase, nucleoside, nucleotide and nucleic acid metabolic process | 1.929873443     | 7.99E-04   |

Cluster 16

| Category      | Term                                                 | Fold Enrichment | Bonferroni |
|---------------|------------------------------------------------------|-----------------|------------|
| GOTERM_BP_FAT | GO:0035215~genital disc development                  | 5.795269841     | 7.29E-11   |
| GOTERM_BP_FAT | GO:0035225~determination of genital disc primordium  | 7.055111111     | 5.01E-04   |
| GOTERM_BP_FAT | GO:0007445~determination of imaginal disc primordium | 7.055111111     | 5.01E-04   |

Cluster 17

| Category      | Term                                            | Fold Enrichment | Bonferroni |
|---------------|-------------------------------------------------|-----------------|------------|
| GOTERM_BP_FAT | GO:0045941~positive regulation of transcription | 2.615256705     | 5.11E-06   |
| GOTERM_BP_FAT | GO:0010604~positive                             | 2.434510172     | 5.21E-06   |



|               |                                                                                                                  |                 |            |
|---------------|------------------------------------------------------------------------------------------------------------------|-----------------|------------|
|               | regulation of macromolecule<br>metabolic process<br>GO:0010557~positive                                          |                 |            |
| GOTERM_BP_FAT | regulation of macromolecule<br>biosynthetic process<br>GO:0010628~positive                                       | 2.515776055     | 5.37E-06   |
| GOTERM_BP_FAT | regulation of gene expression<br>GO:0045935~positive                                                             | 2.592904084     | 6.91E-06   |
| GOTERM_BP_FAT | regulation of nucleobase,<br>nucleoside, nucleotide and<br>nucleic acid metabolic process<br>GO:0051173~positive | 2.507188246     | 2.20E-05   |
| GOTERM_BP_FAT | regulation of nitrogen<br>compound metabolic process<br>GO:0009891~positive                                      | 2.507188246     | 2.20E-05   |
| GOTERM_BP_FAT | regulation of biosynthetic<br>process<br>GO:0031328~positive                                                     | 2.259480029     | 8.00E-05   |
| GOTERM_BP_FAT | regulation of cellular<br>biosynthetic process<br>GO:0016563~transcription                                       | 2.259480029     | 8.00E-05   |
| GOTERM_MF_FAT | activator activity                                                                                               | 2.525962206     | 2.81E-04   |
| Cluster 18    |                                                                                                                  |                 |            |
| Category      | Term                                                                                                             | Fold Enrichment | Bonferroni |
| GOTERM_BP_FAT | GO:0035295~tube<br>development                                                                                   | 3.420659933     | 3.43E-12   |
| GOTERM_BP_FAT | GO:0007424~open tracheal<br>system development                                                                   | 2.858933914     | 6.29E-12   |
| GOTERM_BP_FAT | GO:0060541~respiratory<br>system development                                                                     | 2.858933914     | 6.29E-12   |
| GOTERM_BP_FAT | GO:0035239~tube<br>morphogenesis                                                                                 | 3.191597884     | 6.47E-08   |
| Cluster 19    |                                                                                                                  |                 |            |
| Category      | Term                                                                                                             | Fold Enrichment | Bonferroni |
| GOTERM_BP_FAT | GO:0001667~ameboidal cell<br>migration                                                                           | 4.188972222     | 7.80E-05   |
| GOTERM_BP_FAT | GO:0007427~epithelial cell<br>migration, open tracheal<br>system                                                 | 4.135754789     | 6.69E-04   |
| GOTERM_BP_FAT | GO:0010631~epithelial cell<br>migration                                                                          | 4.135754789     | 6.69E-04   |
| Cluster 20    |                                                                                                                  |                 |            |
| Category      | Term                                                                                                             | Fold Enrichment | Bonferroni |
| GOTERM_BP_FAT | GO:0030036~actin<br>cytoskeleton organization                                                                    | 2.269476301     | 1.95E-04   |
| GOTERM_BP_FAT | GO:0030029~actin filament-<br>based process                                                                      | 2.253716049     | 2.46E-04   |
| GOTERM_BP_FAT | GO:0007010~cytoskeleton<br>organization                                                                          | 1.608261888     | 7.66E-04   |
| Cluster 21    |                                                                                                                  |                 |            |
| Category      | Term                                                                                                             | Fold Enrichment | Bonferroni |
| GOTERM_BP_FAT | GO:0051960~regulation of<br>nervous system development                                                           | 3.057214815     | 1.64E-07   |
| GOTERM_BP_FAT | GO:0050767~regulation of                                                                                         | 3.369605307     | 5.89E-07   |

|                |                                                            |                 |            |
|----------------|------------------------------------------------------------|-----------------|------------|
| GOTERM_BP_FAT  | neurogenesis<br>GO:0060284~regulation of cell development  | 2.58507888      | 7.94E-07   |
| GOTERM_BP_FAT  | GO:0045664~regulation of neuron differentiation            | 3.266255144     | 1.70E-04   |
| Cluster 22     |                                                            |                 |            |
| Category       | Term                                                       | Fold Enrichment | Bonferroni |
| GOTERM_BP_FAT  | GO:0035051~cardiac cell differentiation                    | 6.3496          | 6.41E-09   |
| GOTERM_BP_FAT  | GO:0010002~cardioblast differentiation                     | 6.512410256     | 6.72E-05   |
| Cluster 23     |                                                            |                 |            |
| Category       | Term                                                       | Fold Enrichment | Bonferroni |
| GOTERM_BP_FAT  | GO:0007447~imaginal disc pattern formation                 | 3.01312037      | 8.46E-08   |
| Cluster 24     |                                                            |                 |            |
| Category       | Term                                                       | Fold Enrichment | Bonferroni |
| GOTERM_BP_FAT  | GO:0007365~periodic partitioning                           | 3.135604938     | 8.26E-04   |
| Cluster 25     |                                                            |                 |            |
| Category       | Term                                                       | Fold Enrichment | Bonferroni |
| GOTERM_BP_FAT  | GO:0007498~mesoderm development                            | 3.023619048     | 2.44E-07   |
| GOTERM_BP_FAT  | GO:0001704~formation of primary germ layer                 | 4.233066667     | 1.64E-04   |
| GOTERM_BP_FAT  | GO:0048332~mesoderm morphogenesis                          | 4.442106996     | 1.70E-04   |
| GOTERM_BP_FAT  | GO:0001707~mesoderm formation                              | 4.341606838     | 7.25E-04   |
| Cluster 26     |                                                            |                 |            |
| Category       | Term                                                       | Fold Enrichment | Bonferroni |
| UP_SEQ_FEATURE | DNA-binding region:Basic motif                             | 3.431028431     | 2.80E-05   |
| UP_SEQ_FEATURE | domain:Helix-loop-helix motif                              | 3.622159091     | 3.83E-05   |
| INTERPRO       | IPR001092:Basic helix-loop-helix dimerisation region bHLH  | 3.200251099     | 1.04E-04   |
| Cluster 27     |                                                            |                 |            |
| Category       | Term                                                       | Fold Enrichment | Bonferroni |
| GOTERM_BP_FAT  | GO:0046530~photoreceptor cell differentiation              | 2.755902778     | 2.19E-08   |
| GOTERM_BP_FAT  | GO:0001751~compound eye photoreceptor cell differentiation | 2.733061061     | 1.05E-06   |
| GOTERM_BP_FAT  | GO:0001754~eye photoreceptor cell differentiation          | 2.676076628     | 1.39E-06   |
| Cluster 28     |                                                            |                 |            |
| Category       | Term                                                       | Fold Enrichment | Bonferroni |
| GOTERM_BP_FAT  | GO:0010941~regulation of cell death                        | 2.453951691     | 1.55E-04   |
| Cluster 30     |                                                            |                 |            |

| Category        | Term                                                  | Fold Enrichment | Bonferroni  |
|-----------------|-------------------------------------------------------|-----------------|-------------|
| GOTERM_BP_FAT   | GO:0035218~leg disc development                       | 3.735058824     | 1.17E-06    |
| Cluster 31      |                                                       |                 |             |
| Category        | Term                                                  | Fold Enrichment | Bonferroni  |
| GOTERM_BP_FAT   | GO:0042692~muscle cell differentiation                | 2.95551952      | 5.33E-05    |
| Cluster 32      |                                                       |                 |             |
| Category        | Term                                                  | Fold Enrichment | Bonferroni  |
| GOTERM_BP_FAT   | GO:0040007~growth                                     | 2.437220202     | 4.28E-04    |
| Cluster 33      |                                                       |                 |             |
| Category        | Term                                                  | Fold Enrichment | Bonferroni  |
| GOTERM_CC_FAT   | GO:0005938~cell cortex                                | 2.529186992     | 0.004420148 |
| GOTERM_CC_FAT   | GO:0045177~apical part of cell                        | 2.887893801     | 0.012972582 |
| GOTERM_CC_FAT   | GO:0045179~apical cortex                              | 3.979490022     | 0.02123214  |
| GOTERM_CC_FAT   | GO:0044448~cell cortex part                           | 2.854851538     | 0.026635235 |
| Cluster 34      |                                                       |                 |             |
| Category        | Term                                                  | Fold Enrichment | Bonferroni  |
| GOTERM_BP_FAT   | GO:0001703~gastrulation with mouth forming first      | 3.527555556     | 0.005058133 |
| GOTERM_BP_FAT   | GO:0010004~gastrulation involving germ band extension | 3.527555556     | 0.005058133 |
| GOTERM_BP_FAT   | GO:0007370~ventral furrow formation                   | 4.535428571     | 0.423844247 |
| GOTERM_BP_FAT   | GO:0007377~germ-band extension                        | 5.291333333     | 0.99636596  |
| Cluster 35      |                                                       |                 |             |
| Category        | Term                                                  | Fold Enrichment | Bonferroni  |
| INTERPRO        | IPR013088:Zinc finger, NHR/GATA-type                  | 4.4689897       | 3.12E-04    |
| Cluster 36      |                                                       |                 |             |
| Category        | Term                                                  | Fold Enrichment | Bonferroni  |
| SP_PIR_KEYWORDS | zinc finger                                           | 3.405308604     | 4.85E-05    |
| Cluster 37      |                                                       |                 |             |
| Category        | Term                                                  | Fold Enrichment | Bonferroni  |
| GOTERM_BP_FAT   | GO:0007365~periodic partitioning                      | 3.135604938     | 8.26E-04    |
| Cluster 38      |                                                       |                 |             |
| Category        | Term                                                  | Fold Enrichment | Bonferroni  |
| GOTERM_BP_FAT   | GO:0007435~salivary gland morphogenesis               | 2.475477583     | 1.18E-04    |
| GOTERM_BP_FAT   | GO:0022612~gland morphogenesis                        | 2.475477583     | 1.18E-04    |
| Cluster 39      |                                                       |                 |             |
| Category        | Term                                                  | Fold Enrichment | Bonferroni  |
| GOTERM_BP_FAT   | GO:0035218~leg disc development                       | 3.735058824     | 1.17E-06    |
| Cluster 40      |                                                       |                 |             |

| Category        | Term                                   | Fold Enrichment | Bonferroni |
|-----------------|----------------------------------------|-----------------|------------|
| GOTERM_BP_FAT   | GO:0010941~regulation of cell death    | 2.453951691     | 1.55E-04   |
| Cluster 41      |                                        |                 |            |
| Category        | Term                                   | Fold Enrichment | Bonferroni |
| GOTERM_BP_FAT   | GO:0042692~muscle cell differentiation | 2.95551952      | 5.33E-05   |
| Cluster 42      |                                        |                 |            |
| Category        | Term                                   | Fold Enrichment | Bonferroni |
| SP_PIR_KEYWORDS | zinc-finger                            | 1.779511863     | 2.45E-04   |

### B. Stg11 Top 2000 genes +/- 3kb from Yan bound region

| Cluster1        |                                                            |                 |            |
|-----------------|------------------------------------------------------------|-----------------|------------|
| Category        | Term                                                       | Fold Enrichment | Bonferroni |
| SP_PIR_KEYWORDS | dna-binding                                                | 3.210500953     | 5.65E-47   |
| GOTERM_MF_FAT   | GO:0030528~transcription regulator activity                | 2.408069822     | 3.54E-41   |
| GOTERM_MF_FAT   | GO:0003700~transcription factor activity                   | 2.910388735     | 1.63E-38   |
| GOTERM_BP_FAT   | GO:0045449~regulation of transcription                     | 2.223291648     | 9.46E-37   |
| GOTERM_MF_FAT   | GO:0003677~DNA binding                                     | 2.138657366     | 1.14E-34   |
| GOTERM_BP_FAT   | GO:0006355~regulation of transcription, DNA-dependent      | 2.345325656     | 3.83E-32   |
| GOTERM_BP_FAT   | GO:0051252~regulation of RNA metabolic process             | 2.20086198      | 4.03E-29   |
| SP_PIR_KEYWORDS | transcription regulation                                   | 2.783406778     | 3.22E-29   |
| SP_PIR_KEYWORDS | nucleus                                                    | 2.036421481     | 7.25E-26   |
| SP_PIR_KEYWORDS | Transcription                                              | 2.62344436      | 5.92E-25   |
| GOTERM_MF_FAT   | GO:0043565~sequence-specific DNA binding                   | 2.825795311     | 1.41E-19   |
| GOTERM_BP_FAT   | GO:0006350~transcription                                   | 2.182778334     | 9.20E-18   |
| GOTERM_MF_FAT   | GO:0003702~RNA polymerase II transcription factor activity | 2.637692707     | 5.42E-18   |
| Cluster 2       |                                                            |                 |            |
| Category        | Term                                                       | Fold Enrichment | Bonferroni |
| GOTERM_BP_FAT   | GO:0007444~imaginal disc development                       | 2.91469218      | 6.56E-40   |
| GOTERM_BP_FAT   | GO:0048569~post-embryonic organ development                | 3.301610555     | 4.61E-39   |
| GOTERM_BP_FAT   | GO:0009886~post-embryonic morphogenesis                    | 2.979135229     | 1.15E-35   |
| GOTERM_BP_FAT   | GO:0048707~instar larval or pupal morphogenesis            | 2.989692956     | 2.47E-35   |
| GOTERM_BP_FAT   | GO:0007560~imaginal disc morphogenesis                     | 3.22756188      | 6.33E-35   |
| GOTERM_BP_FAT   | GO:0048563~post-embryonic organ morphogenesis              | 3.22756188      | 6.33E-35   |
| GOTERM_BP_FAT   | GO:0007552~metamorphosis                                   | 2.924697171     | 8.37E-35   |
| GOTERM_BP_FAT   | GO:0009791~post-embryonic development                      | 2.701453036     | 7.62E-34   |
| GOTERM_BP_FAT   | GO:0002165~instar larval or pupal development              | 2.651865686     | 1.24E-30   |
| GOTERM_BP_FAT   | GO:0035107~appendage morphogenesis                         | 3.083025666     | 1.21E-25   |

|               |                                                          |             |          |
|---------------|----------------------------------------------------------|-------------|----------|
| GOTERM_BP_FAT | GO:0048736~appendage development                         | 3.061779884 | 1.29E-25 |
| GOTERM_BP_FAT | GO:0035114~imaginal disc-derived appendage morphogenesis | 3.091994022 | 1.71E-25 |
| GOTERM_BP_FAT | GO:0048737~imaginal disc-derived appendage development   | 3.070338318 | 1.84E-25 |
| GOTERM_BP_FAT | GO:0035220~wing disc development                         | 2.832141253 | 1.00E-23 |
| GOTERM_BP_FAT | GO:0035120~post-embryonic appendage morphogenesis        | 3.040841618 | 3.83E-23 |
| GOTERM_BP_FAT | GO:0007476~imaginal disc-derived wing morphogenesis      | 2.966115825 | 2.47E-20 |
| GOTERM_BP_FAT | GO:0007472~wing disc morphogenesis                       | 2.939151135 | 5.34E-20 |

#### Cluster 3

| Category      | Term                                                             | Fold Enrichment | Bonferroni |
|---------------|------------------------------------------------------------------|-----------------|------------|
| GOTERM_BP_FAT | GO:0030182~neuron differentiation                                | 2.883951731     | 2.19E-38   |
| GOTERM_BP_FAT | GO:0000902~cell morphogenesis                                    | 2.716862394     | 3.69E-35   |
| GOTERM_BP_FAT | GO:0048666~neuron development                                    | 2.928260909     | 2.73E-33   |
| GOTERM_BP_FAT | GO:0032989~cellular component morphogenesis                      | 2.455423898     | 8.97E-31   |
| GOTERM_BP_FAT | GO:0000904~cell morphogenesis involved in differentiation        | 2.954820639     | 2.67E-29   |
| GOTERM_BP_FAT | GO:0048812~neuron projection morphogenesis                       | 3.006232353     | 7.69E-29   |
| GOTERM_BP_FAT | GO:0031175~neuron projection development                         | 2.995757676     | 1.15E-28   |
| GOTERM_BP_FAT | GO:0048667~cell morphogenesis involved in neuron differentiation | 2.98535574      | 1.71E-28   |
| GOTERM_BP_FAT | GO:0030030~cell projection organization                          | 2.647580972     | 4.42E-26   |
| GOTERM_BP_FAT | GO:0006928~cell motion                                           | 2.818958862     | 1.06E-25   |
| GOTERM_BP_FAT | GO:0048858~cell projection morphogenesis                         | 2.753435542     | 2.71E-25   |
| GOTERM_BP_FAT | GO:0032990~cell part morphogenesis                               | 2.661931641     | 1.07E-23   |
| GOTERM_BP_FAT | GO:0007409~axonogenesis                                          | 3.15806227      | 7.65E-22   |
| GOTERM_BP_FAT | GO:0007411~axon guidance                                         | 3.605067407     | 1.63E-20   |
| GOTERM_BP_FAT | GO:0016358~dendrite development                                  | 2.915134403     | 5.71E-09   |
| GOTERM_BP_FAT | GO:0048813~dendrite morphogenesis                                | 2.915134403     | 5.71E-09   |

#### Cluster 4

| Category      | Term                               | Fold Enrichment | Bonferroni |
|---------------|------------------------------------|-----------------|------------|
| GOTERM_BP_FAT | GO:0048729~tissue morphogenesis    | 3.221990656     | 1.04E-29   |
| GOTERM_BP_FAT | GO:0048598~embryonic morphogenesis | 3.081206772     | 1.11E-23   |
| GOTERM_BP_FAT | GO:0002009~morphogenesis of        | 3.031739779     | 1.74E-22   |

|                 |                                                                             |                 |            |
|-----------------|-----------------------------------------------------------------------------|-----------------|------------|
|                 | an epithelium                                                               |                 |            |
| GOTERM_BP_FAT   | GO:0060429~epithelium development                                           | 2.963203109     | 4.17E-22   |
| GOTERM_BP_FAT   | GO:0016331~morphogenesis of embryonic epithelium                            | 3.079110713     | 4.41E-11   |
| GOTERM_BP_FAT   | GO:0007391~dorsal closure                                                   | 3.291033313     | 3.60E-10   |
|                 | GO:0001700~embryonic development via the syncytial blastoderm               | 2.423886579     | 3.79E-10   |
| GOTERM_BP_FAT   | GO:0009792~embryonic development ending in birth or egg hatching            | 2.315677356     | 4.87E-09   |
| Cluster 5       |                                                                             |                 |            |
| Category        | Term                                                                        | Fold Enrichment | Bonferroni |
| SP_PIR_KEYWORDS | Homeobox                                                                    | 4.290958005     | 7.77E-22   |
|                 | GO:0043565~sequence-specific DNA binding                                    | 2.825795311     | 1.41E-19   |
| GOTERM_MF_FAT   | IPR017970:Homeobox, conserved site                                          | 4.100168166     | 3.81E-19   |
| INTERPRO        | IPR001356:Homeobox                                                          | 3.970073703     | 1.22E-18   |
| INTERPRO        | IPR012287:Homeodomain-related                                               | 3.683821758     | 6.11E-16   |
| SMART           | SM00389:HOX                                                                 | 3.171821064     | 5.63E-15   |
| UP_SEQ_FEATURE  | DNA-binding region:Homeobox                                                 | 3.93258427      | 1.55E-12   |
| Cluster 6       |                                                                             |                 |            |
| Category        | Term                                                                        | Fold Enrichment | Bonferroni |
| GOTERM_BP_FAT   | GO:0006928~cell motion                                                      | 2.818958862     | 1.06E-25   |
| GOTERM_BP_FAT   | GO:0016477~cell migration                                                   | 2.72044507      | 7.71E-12   |
| GOTERM_BP_FAT   | GO:0048870~cell motility                                                    | 2.545871055     | 3.15E-10   |
| GOTERM_BP_FAT   | GO:0051674~localization of cell                                             | 2.501475344     | 3.44E-10   |
| Cluster 7       |                                                                             |                 |            |
| Category        | Term                                                                        | Fold Enrichment | Bonferroni |
| GOTERM_BP_FAT   | GO:0007155~cell adhesion                                                    | 2.817753836     | 2.75E-13   |
|                 | GO:0022610~biological adhesion                                              | 2.607921103     | 3.28E-11   |
| GOTERM_BP_FAT   | GO:0016337~cell-cell adhesion                                               | 3.372168187     | 9.57E-06   |
| Cluster 8       |                                                                             |                 |            |
| Category        | Term                                                                        | Fold Enrichment | Bonferroni |
|                 | GO:0007167~enzyme linked receptor protein signaling pathway                 | 2.989269287     | 1.10E-12   |
| GOTERM_BP_FAT   | GO:0007169~transmembrane receptor protein tyrosine kinase signaling pathway | 2.998710504     | 5.40E-09   |
| GOTERM_BP_FAT   | GO:0007173~epidermal growth factor receptor signaling pathway               | 4.342335621     | 1.81E-06   |
| Cluster 9       |                                                                             |                 |            |
| Category        | Term                                                                        | Fold Enrichment | Bonferroni |
|                 | GO:0007447~imaginal disc pattern formation                                  | 3.848888392     | 2.47E-16   |
| GOTERM_BP_FAT   | GO:0035222~wing disc pattern formation                                      | 3.552820054     | 2.36E-08   |

|               |                                                            |                 |            |
|---------------|------------------------------------------------------------|-----------------|------------|
| GOTERM_BP_FAT | GO:0009953~dorsal/ventral pattern formation                | 2.684352929     | 4.12E-08   |
| GOTERM_BP_FAT | GO:0007450~dorsal/ventral pattern formation, imaginal disc | 3.61515023      | 6.24E-07   |
| GOTERM_BP_FAT | GO:0048190~wing disc dorsal/ventral pattern formation      | 3.268594449     | 6.33E-04   |
| Cluster 10    |                                                            |                 |            |
| Category      | Term                                                       | Fold Enrichment | Bonferroni |
| GOTERM_BP_FAT | GO:0048859~formation of anatomical boundary                | 5.16773826      | 5.09E-14   |
| GOTERM_BP_FAT | GO:0048645~organ formation                                 | 5.329230081     | 2.75E-13   |
| GOTERM_BP_FAT | GO:0010160~formation of organ boundary                     | 5.235734816     | 4.68E-12   |
| GOTERM_BP_FAT | GO:0008052~sensory organ boundary specification            | 4.943053988     | 6.10E-05   |
| GOTERM_BP_FAT | GO:0007432~salivary gland boundary specification           | 5.684512086     | 7.98E-04   |
| Cluster 11    |                                                            |                 |            |
| Category      | Term                                                       | Fold Enrichment | Bonferroni |
| GOTERM_BP_FAT | GO:0014016~neuroblast differentiation                      | 5.583002942     | 1.19E-09   |
| GOTERM_BP_FAT | GO:0014017~neuroblast fate commitment                      | 5.526608972     | 6.45E-09   |
| GOTERM_BP_FAT | GO:0007400~neuroblast fate determination                   | 5.400286482     | 1.83E-07   |
| GOTERM_BP_FAT | GO:0007419~ventral cord development                        | 4.58428394      | 3.67E-06   |
| Cluster 12    |                                                            |                 |            |
| Category      | Term                                                       | Fold Enrichment | Bonferroni |
| GOTERM_BP_FAT | GO:0007423~sensory organ development                       | 2.616955259     | 9.37E-29   |
| GOTERM_BP_FAT | GO:0001654~eye development                                 | 2.482693532     | 5.27E-19   |
| GOTERM_BP_FAT | GO:0048749~compound eye development                        | 2.46851783      | 4.55E-17   |
| GOTERM_BP_FAT | GO:0048592~eye morphogenesis                               | 2.377351709     | 1.65E-12   |
| GOTERM_BP_FAT | GO:0001745~compound eye morphogenesis                      | 2.387495076     | 1.16E-11   |
| GOTERM_BP_FAT | GO:0046530~photoreceptor cell differentiation              | 2.99769192      | 4.96E-11   |
| GOTERM_BP_FAT | GO:0001751~compound eye photoreceptor cell differentiation | 2.816650133     | 2.04E-07   |
| GOTERM_BP_FAT | GO:0001754~eye photoreceptor cell differentiation          | 2.756498318     | 2.78E-07   |
| GOTERM_BP_FAT | GO:0042461~photoreceptor cell development                  | 3.15806227      | 5.48E-05   |
| Cluster 13    |                                                            |                 |            |
| Category      | Term                                                       | Fold Enrichment | Bonferroni |
| GOTERM_BP_FAT | GO:0035218~leg disc development                            | 4.876419682     | 2.08E-14   |

|               |                                                             |             |          |
|---------------|-------------------------------------------------------------|-------------|----------|
| GOTERM_BP_FAT | GO:0007449~proximal/distal pattern formation, imaginal disc | 6.090548664 | 2.50E-08 |
| GOTERM_BP_FAT | GO:0009954~proximal/distal pattern formation                | 5.560935736 | 3.19E-07 |
| GOTERM_BP_FAT | GO:0007479~leg disc proximal/distal pattern formation       | 5.773332587 | 1.48E-04 |
| GOTERM_BP_FAT | GO:0035223~leg disc pattern formation                       | 5.773332587 | 1.48E-04 |

#### Cluster 14

| Category      | Term                                                                                                    | Fold Enrichment | Bonferroni |
|---------------|---------------------------------------------------------------------------------------------------------|-----------------|------------|
| GOTERM_BP_FAT | GO:0010628~positive regulation of gene expression                                                       | 2.79367047      | 9.82E-08   |
| GOTERM_BP_FAT | GO:0045941~positive regulation of transcription                                                         | 2.756498318     | 2.78E-07   |
| GOTERM_BP_FAT | GO:0010557~positive regulation of macromolecule biosynthetic process                                    | 2.64395911      | 3.25E-07   |
| GOTERM_BP_FAT | GO:0010604~positive regulation of macromolecule metabolic process                                       | 2.552025672     | 3.44E-07   |
| GOTERM_BP_FAT | GO:0045935~positive regulation of nucleobase, nucleoside, nucleotide and nucleic acid metabolic process | 2.642593428     | 1.37E-06   |
| GOTERM_BP_FAT | GO:0051173~positive regulation of nitrogen compound metabolic process                                   | 2.642593428     | 1.37E-06   |
| GOTERM_BP_FAT | GO:0031328~positive regulation of cellular biosynthetic process                                         | 2.368546702     | 6.69E-06   |
| GOTERM_BP_FAT | GO:0009891~positive regulation of biosynthetic process                                                  | 2.368546702     | 6.69E-06   |
| GOTERM_BP_FAT | GO:0045893~positive regulation of transcription, DNA-dependent                                          | 2.826106861     | 2.12E-05   |
| GOTERM_BP_FAT | GO:0051254~positive regulation of RNA metabolic process                                                 | 2.763304486     | 4.16E-05   |
| GOTERM_MF_FAT | GO:0016563~transcription activator activity                                                             | 2.630090444     | 6.04E-05   |

#### Cluster 15

| Category      | Term                                       | Fold Enrichment | Bonferroni |
|---------------|--------------------------------------------|-----------------|------------|
| GOTERM_BP_FAT | GO:0007498~mesoderm development            | 3.66994599      | 2.75E-13   |
| GOTERM_BP_FAT | GO:0007369~gastrulation                    | 3.848888392     | 1.87E-11   |
| GOTERM_BP_FAT | GO:0048332~mesoderm morphogenesis          | 5.000265261     | 1.34E-06   |
| GOTERM_BP_FAT | GO:0001704~formation of primary germ layer | 4.737093405     | 1.63E-06   |
| GOTERM_BP_FAT | GO:0001707~mesoderm formation              | 4.919289305     | 6.48E-06   |
| GOTERM_BP_FAT | GO:0001710~mesodermal cell fate commitment | 5.684512086     | 7.98E-04   |



|               |                                                          |                 |            |
|---------------|----------------------------------------------------------|-----------------|------------|
| GOTERM_BP_FAT | GO:0048333~mesodermal cell differentiation               | 5.684512086     | 7.98E-04   |
| Cluster 16    |                                                          |                 |            |
| Category      | Term                                                     | Fold Enrichment | Bonferroni |
| GOTERM_BP_FAT | GO:0048732~gland development                             | 3.400244959     | 1.64E-21   |
| GOTERM_BP_FAT | GO:0007431~salivary gland development                    | 3.322781345     | 9.27E-17   |
| GOTERM_BP_FAT | GO:0035272~exocrine system development                   | 3.322781345     | 9.27E-17   |
| GOTERM_BP_FAT | GO:0022612~gland morphogenesis                           | 2.867188114     | 3.46E-08   |
| GOTERM_BP_FAT | GO:0007435~salivary gland morphogenesis                  | 2.867188114     | 3.46E-08   |
| Cluster 17    |                                                          |                 |            |
| Category      | Term                                                     | Fold Enrichment | Bonferroni |
| GOTERM_BP_FAT | GO:0051301~cell division                                 | 2.114361203     | 2.12E-05   |
| GOTERM_BP_FAT | GO:0008356~asymmetric cell division                      | 3.307797981     | 3.19E-05   |
| GOTERM_BP_FAT | GO:0017145~stem cell division                            | 3.483156915     | 3.56E-05   |
| Cluster 18    |                                                          |                 |            |
| Category      | Term                                                     | Fold Enrichment | Bonferroni |
| GOTERM_BP_FAT | GO:0035051~cardiac cell differentiation                  | 7.105640107     | 2.48E-12   |
| GOTERM_BP_FAT | GO:0010002~cardioblast differentiation                   | 7.105640107     | 1.59E-06   |
| Cluster 19    |                                                          |                 |            |
| Category      | Term                                                     | Fold Enrichment | Bonferroni |
| GOTERM_BP_FAT | GO:0007163~establishment or maintenance of cell polarity | 2.868331786     | 1.01E-07   |
| GOTERM_BP_FAT | GO:0001738~morphogenesis of a polarized epithelium       | 3.248292621     | 1.84E-06   |
| GOTERM_BP_FAT | GO:0007164~establishment of tissue polarity              | 3.323605857     | 7.14E-06   |
| GOTERM_BP_FAT | GO:0001736~establishment of planar polarity              | 3.261605295     | 2.35E-05   |
| GOTERM_BP_FAT | GO:0042067~establishment of ommatidial polarity          | 3.552820054     | 9.90E-05   |
| Cluster 20    |                                                          |                 |            |
| Category      | Term                                                     | Fold Enrichment | Bonferroni |
| GOTERM_BP_FAT | GO:0035218~leg disc development                          | 4.876419682     | 2.08E-14   |
| GOTERM_BP_FAT | GO:0035110~leg morphogenesis                             | 4.737093405     | 2.03E-09   |
| GOTERM_BP_FAT | GO:0035108~limb morphogenesis                            | 4.61866607      | 4.70E-09   |
| GOTERM_BP_FAT | GO:0060173~limb development                              | 4.61866607      | 4.70E-09   |
| GOTERM_BP_FAT | GO:0007478~leg disc morphogenesis                        | 4.813498137     | 3.50E-07   |
| GOTERM_BP_FAT | GO:0035127~post-embryonic limb morphogenesis             | 4.655419381     | 7.49E-06   |
| GOTERM_BP_FAT | GO:0007480~imaginal disc-                                | 4.655419381     | 7.49E-06   |

|               |                                                                                      |                 |            |
|---------------|--------------------------------------------------------------------------------------|-----------------|------------|
| GOTERM_BP_FAT | derived leg morphogenesis<br>GO:0035109~imaginal disc-<br>derived limb morphogenesis | 4.500238735     | 1.63E-05   |
| Cluster 21    |                                                                                      |                 |            |
| Category      | Term                                                                                 | Fold Enrichment | Bonferroni |
| GOTERM_BP_FAT | GO:0060541~respiratory<br>system development                                         | 3.018735993     | 3.81E-14   |
| GOTERM_BP_FAT | GO:0007424~open tracheal<br>system development                                       | 3.018735993     | 3.81E-14   |
| GOTERM_BP_FAT | GO:0035295~tube<br>development                                                       | 3.373384697     | 1.46E-11   |
| GOTERM_BP_FAT | GO:0035239~tube<br>morphogenesis                                                     | 3.129865285     | 2.46E-07   |
| GOTERM_BP_FAT | GO:0001763~morphogenesis of<br>a branching structure                                 | 3.891183868     | 1.13E-05   |
| GOTERM_BP_FAT | GO:0060446~branching<br>involved in open tracheal<br>system development              | 3.643918004     | 5.82E-04   |
| GOTERM_BP_FAT | GO:0048754~branching<br>morphogenesis of a tube                                      | 3.643918004     | 5.82E-04   |
| Cluster 22    |                                                                                      |                 |            |
| Category      | Term                                                                                 | Fold Enrichment | Bonferroni |
| GOTERM_BP_FAT | GO:0048565~gut development<br>GO:0048567~ectodermal gut<br>morphogenesis             | 3.893501429     | 4.68E-12   |
| GOTERM_BP_FAT | GO:0007439~ectodermal gut<br>development                                             | 3.707290491     | 1.64E-05   |
| GOTERM_BP_FAT | GO:0048547~gut<br>morphogenesis                                                      | 3.707290491     | 1.64E-05   |
| GOTERM_BP_FAT | GO:0048546~digestive tract<br>morphogenesis                                          | 3.62841197      | 2.78E-05   |
| GOTERM_BP_FAT | GO:0055123~digestive system<br>development                                           | 3.552820054     | 4.64E-05   |
| GOTERM_BP_FAT | GO:0007442~hindgut<br>morphogenesis                                                  | 3.552820054     | 4.64E-05   |
| GOTERM_BP_FAT |                                                                                      | 3.552820054     | 4.51E-04   |
| Cluster 23    |                                                                                      |                 |            |
| Category      | Term                                                                                 | Fold Enrichment | Bonferroni |
| GOTERM_BP_FAT | GO:0035215~genital disc<br>development                                               | 5.583002942     | 1.19E-09   |
| GOTERM_BP_FAT | GO:0007445~determination of<br>imaginal disc primordium                              | 7.105640107     | 4.53E-04   |
| GOTERM_BP_FAT | GO:0035225~determination of<br>genital disc primordium                               | 7.105640107     | 4.53E-04   |
| Cluster 24    |                                                                                      |                 |            |
| Category      | Term                                                                                 | Fold Enrichment | Bonferroni |
| GOTERM_BP_FAT | GO:0003006~reproductive<br>developmental process                                     | 1.755345876     | 1.59E-07   |
| GOTERM_BP_FAT | GO:0030707~ovarian follicle<br>cell development                                      | 2.159557288     | 6.36E-06   |
| GOTERM_BP_FAT | GO:0048610~reproductive<br>cellular process                                          | 1.676931065     | 1.15E-05   |
| GOTERM_BP_FAT | GO:0007276~gamete<br>generation                                                      | 1.480755771     | 5.51E-04   |
| GOTERM_BP_FAT | GO:0007292~female gamete                                                             | 1.561679144     | 5.94E-04   |

|                 |                                                                                 |                 |            |
|-----------------|---------------------------------------------------------------------------------|-----------------|------------|
|                 | generation                                                                      |                 |            |
| GOTERM_BP_FAT   | GO:0019953~sexual reproduction                                                  | 1.469465709     | 6.66E-04   |
| GOTERM_BP_FAT   | GO:0048477~oogenesis                                                            | 1.55559468      | 9.67E-04   |
| Cluster 25      |                                                                                 |                 |            |
| Category        | Term                                                                            | Fold Enrichment | Bonferroni |
| GOTERM_BP_FAT   | GO:0045596~negative regulation of cell differentiation                          | 4.073900328     | 3.36E-14   |
| GOTERM_BP_FAT   | GO:0008356~asymmetric cell division                                             | 3.307797981     | 3.19E-05   |
| Cluster 26      |                                                                                 |                 |            |
| Category        | Term                                                                            | Fold Enrichment | Bonferroni |
| GOTERM_MF_FAT   | GO:0016564~transcription repressor activity                                     | 3.333975724     | 2.03E-13   |
| GOTERM_BP_FAT   | GO:0006357~regulation of transcription from RNA polymerase II promoter          | 2.627606498     | 8.26E-12   |
| GOTERM_BP_FAT   | GO:0000122~negative regulation of transcription from RNA polymerase II promoter | 3.611063005     | 1.37E-07   |
| GOTERM_BP_FAT   | GO:0010558~negative regulation of macromolecule biosynthetic process            | 1.877506532     | 8.94E-04   |
| Cluster 27      |                                                                                 |                 |            |
| Category        | Term                                                                            | Fold Enrichment | Bonferroni |
| GOTERM_BP_FAT   | GO:0001667~ameboidal cell migration                                             | 3.99692256      | 5.07E-04   |
| GOTERM_BP_FAT   | GO:0007427~epithelial cell migration, open tracheal system                      | 4.165375235     | 5.82E-04   |
| GOTERM_BP_FAT   | GO:0010631~epithelial cell migration                                            | 4.165375235     | 5.82E-04   |
| Cluster 28      |                                                                                 |                 |            |
| Category        | Term                                                                            | Fold Enrichment | Bonferroni |
| GOTERM_BP_FAT   | GO:0016337~cell-cell adhesion                                                   | 3.372168187     | 9.57E-06   |
| SP_PIR_KEYWORDS | cell adhesion                                                                   | 3.679802067     | 2.02E-05   |
| Cluster 29      |                                                                                 |                 |            |
| Category        | Term                                                                            | Fold Enrichment | Bonferroni |
| GOTERM_CC_FAT   | GO:0005912~adherens junction                                                    | 3.358703627     | 1.21E-04   |
| GOTERM_CC_FAT   | GO:0070161~anchoring junction                                                   | 3.288730635     | 1.87E-04   |
| GOTERM_CC_FAT   | GO:0030054~cell junction                                                        | 2.195461971     | 4.38E-04   |
| Cluster 30      |                                                                                 |                 |            |
| Category        | Term                                                                            | Fold Enrichment | Bonferroni |
| GOTERM_BP_FAT   | GO:0040008~regulation of growth                                                 | 2.759471886     | 3.40E-06   |
| Cluster 31      |                                                                                 |                 |            |
| Category        | Term                                                                            | Fold Enrichment | Bonferroni |
| INTERPRO        | IPR001092:Basic helix-loop-helix dimerisation region bHLH                       | 3.186633009     | 1.19E-04   |
| UP_SEQ_FEATURE  | DNA-binding region:Basic motif                                                  | 3.162010325     | 8.88E-04   |

| Cluster 32    |                                                                  |                 |            |
|---------------|------------------------------------------------------------------|-----------------|------------|
| Category      | Term                                                             | Fold Enrichment | Bonferroni |
| GOTERM_BP_FAT | GO:0007389~pattern specification process                         | 2.605401373     | 5.23E-34   |
| GOTERM_BP_FAT | GO:0003002~regionalization                                       | 2.629399864     | 8.19E-33   |
| GOTERM_BP_FAT | GO:0035282~segmentation                                          | 2.377656497     | 4.41E-12   |
| GOTERM_BP_FAT | GO:0009880~embryonic pattern specification                       | 2.430067396     | 2.78E-11   |
| GOTERM_BP_FAT | GO:0007350~blastoderm segmentation                               | 2.444600954     | 1.02E-10   |
| GOTERM_BP_FAT | GO:0009952~anterior/posterior pattern formation                  | 2.089894149     | 8.35E-04   |
| Cluster 33    |                                                                  |                 |            |
| Category      | Term                                                             | Fold Enrichment | Bonferroni |
| GOTERM_BP_FAT | GO:0042692~muscle cell differentiation                           | 2.976687072     | 4.34E-05   |
| Cluster 34    |                                                                  |                 |            |
| Category      | Term                                                             | Fold Enrichment | Bonferroni |
| GOTERM_BP_FAT | GO:0008038~neuron recognition                                    | 3.335300459     | 4.08E-04   |
| GOTERM_BP_FAT | GO:0008037~cell recognition                                      | 3.268594449     | 6.33E-04   |
| Cluster 35    |                                                                  |                 |            |
| Category      | Term                                                             | Fold Enrichment | Bonferroni |
| GOTERM_BP_FAT | GO:0007365~periodic partitioning                                 | 3.289648198     | 1.42E-04   |
| Cluster 36    |                                                                  |                 |            |
| Category      | Term                                                             | Fold Enrichment | Bonferroni |
| GOTERM_BP_FAT | GO:0035287~head segmentation                                     | 5.07545722      | 1.20E-04   |
| Cluster 37    |                                                                  |                 |            |
| Category      | Term                                                             | Fold Enrichment | Bonferroni |
| GOTERM_BP_FAT | GO:0051960~regulation of nervous system development              | 3.15806227      | 2.67E-08   |
| GOTERM_BP_FAT | GO:0060284~regulation of cell development                        | 2.657834849     | 1.64E-07   |
| GOTERM_BP_FAT | GO:0050767~regulation of neurogenesis                            | 3.393738559     | 4.71E-07   |
| GOTERM_BP_FAT | GO:0045664~regulation of neuron differentiation                  | 3.289648198     | 1.42E-04   |
| Cluster 38    |                                                                  |                 |            |
| Category      | Term                                                             | Fold Enrichment | Bonferroni |
| GOTERM_BP_FAT | GO:0035152~regulation of tube architecture, open tracheal system | 4.113791641     | 7.04E-06   |
| GOTERM_BP_FAT | GO:0048871~multicellular organismal homeostasis                  | 5.433724788     | 4.38E-04   |
| GOTERM_BP_FAT | GO:0001894~tissue homeostasis                                    | 5.433724788     | 4.38E-04   |
| Cluster 39    |                                                                  |                 |            |
| Category      | Term                                                             | Fold Enrichment | Bonferroni |

|                 |                                                  |                 |             |
|-----------------|--------------------------------------------------|-----------------|-------------|
| GOTERM_BP_FAT   | GO:0017145~stem cell division                    | 3.483156915     | 3.56E-05    |
| GOTERM_BP_FAT   | GO:0048103~somatic stem cell division            | 3.920353163     | 0.004190168 |
| Cluster 40      |                                                  |                 |             |
| Category        | Term                                             | Fold Enrichment | Bonferroni  |
| GOTERM_BP_FAT   | GO:0042659~regulation of cell fate specification | 5.329230081     | 4.60E-05    |
| GOTERM_BP_FAT   | GO:0010453~regulation of cell fate commitment    | 5.329230081     | 4.60E-05    |
| Cluster 41      |                                                  |                 |             |
| Category        | Term                                             | Fold Enrichment | Bonferroni  |
| UP_SEQ_FEATURE  | DNA-binding region:Basic motif                   | 3.162010325     | 8.88E-04    |
| UP_SEQ_FEATURE  | domain:Helix-loop-helix motif                    | 3.307876873     | 0.001503761 |
| Cluster 42      |                                                  |                 |             |
| Category        | Term                                             | Fold Enrichment | Bonferroni  |
| GOTERM_BP_FAT   | GO:0007548~sex differentiation                   | 3.079110713     | 3.56E-04    |
| Cluster 43      |                                                  |                 |             |
| Category        | Term                                             | Fold Enrichment | Bonferroni  |
| SP_PIR_KEYWORDS | zinc finger                                      | 3.469902484     | 3.44E-05    |
| Cluster 44      |                                                  |                 |             |
| Category        | Term                                             | Fold Enrichment | Bonferroni  |
| GOTERM_BP_FAT   | GO:0042692~muscle cell differentiation           | 2.976687072     | 4.34E-05    |
| Cluster 45      |                                                  |                 |             |
| Category        | Term                                             | Fold Enrichment | Bonferroni  |
| SP_PIR_KEYWORDS | zinc finger                                      | 3.469902484     | 3.44E-05    |
| Cluster 46      |                                                  |                 |             |
| Category        | Term                                             | Fold Enrichment | Bonferroni  |
| SP_PIR_KEYWORDS | egf-like domain                                  | 3.168171833     | 8.12E-04    |
| Cluster 47      |                                                  |                 |             |
| Category        | Term                                             | Fold Enrichment | Bonferroni  |
| GOTERM_CC_FAT   | GO:0030054~cell junction                         | 2.195461971     | 4.38E-04    |
| GOTERM_CC_FAT   | GO:0005911~cell-cell junction                    | 2.947044335     | 9.20E-04    |
| Cluster 48      |                                                  |                 |             |
| Category        | Term                                             | Fold Enrichment | Bonferroni  |
| SP_PIR_KEYWORDS | zinc-finger                                      | 1.886777493     | 1.14E-05    |
| SP_PIR_KEYWORDS | zinc                                             | 1.546827149     | 3.95E-04    |
| Cluster 49      |                                                  |                 |             |
| Category        | Term                                             | Fold Enrichment | Bonferroni  |
| GOTERM_BP_FAT   | GO:0048634~regulation of muscle development      | 3.875803695     | 9.09E-04    |
| Cluster 50      |                                                  |                 |             |
| Category        | Term                                             | Fold Enrichment | Bonferroni  |
| SP_PIR_KEYWORDS | glycoprotein                                     | 1.68032759      | 9.86E-05    |

---

**C. D. virilis +/- 3kb from Yan bound region**

---

| Cluster 1     |                                                                  |                 |            |
|---------------|------------------------------------------------------------------|-----------------|------------|
| Category      | Term                                                             | Fold Enrichment | Bonferroni |
| GOTERM_BP_FAT | GO:0007444~imaginal disc development                             | 2.437469694     | 2.68E-17   |
| GOTERM_BP_FAT | GO:0048569~post-embryonic organ development                      | 2.669424545     | 9.52E-16   |
| GOTERM_BP_FAT | GO:0009791~post-embryonic development                            | 2.273316387     | 1.92E-14   |
| GOTERM_BP_FAT | GO:0007552~metamorphosis                                         | 2.409118781     | 3.22E-14   |
| GOTERM_BP_FAT | GO:0009886~post-embryonic morphogenesis                          | 2.420631153     | 5.09E-14   |
| GOTERM_BP_FAT | GO:0048707~instar larval or pupal morphogenesis                  | 2.41171353      | 2.75E-13   |
| GOTERM_BP_FAT | GO:0007560~imaginal disc morphogenesis                           | 2.574490785     | 2.75E-13   |
| GOTERM_BP_FAT | GO:0048563~post-embryonic organ morphogenesis                    | 2.574490785     | 2.75E-13   |
| GOTERM_BP_FAT | GO:0002165~instar larval or pupal development                    | 2.170663643     | 2.12E-11   |
| GOTERM_BP_FAT | GO:0035220~wing disc development                                 | 2.382532655     | 8.07E-10   |
| GOTERM_BP_FAT | GO:0035120~post-embryonic appendage morphogenesis                | 2.500399847     | 5.21E-09   |
| GOTERM_BP_FAT | GO:0048736~appendage development                                 | 2.435036048     | 5.76E-09   |
| GOTERM_BP_FAT | GO:0035107~appendage morphogenesis                               | 2.438883334     | 7.91E-09   |
| GOTERM_BP_FAT | GO:0048737~imaginal disc-derived appendage development           | 2.428846777     | 9.71E-09   |
| GOTERM_BP_FAT | GO:0035114~imaginal disc-derived appendage morphogenesis         | 2.43263877      | 1.34E-08   |
| GOTERM_BP_FAT | GO:0007476~imaginal disc-derived wing morphogenesis              | 2.464931931     | 5.29E-08   |
| GOTERM_BP_FAT | GO:0007472~wing disc morphogenesis                               | 2.442523459     | 8.00E-08   |
| Cluster 2     |                                                                  |                 |            |
| Category      | Term                                                             | Fold Enrichment | Bonferroni |
| GOTERM_BP_FAT | GO:0048666~neuron development                                    | 2.437099988     | 4.69E-14   |
| GOTERM_BP_FAT | GO:0006928~cell motion                                           | 2.512759957     | 2.75E-13   |
| GOTERM_BP_FAT | GO:0030182~neuron differentiation                                | 2.239967002     | 1.65E-12   |
| GOTERM_BP_FAT | GO:0000902~cell morphogenesis                                    | 2.052799554     | 9.75E-10   |
| GOTERM_BP_FAT | GO:0048667~cell morphogenesis involved in neuron differentiation | 2.294036718     | 9.16E-09   |
| GOTERM_BP_FAT | GO:0048812~neuron projection morphogenesis                       | 2.279277881     | 1.83E-08   |
| GOTERM_BP_FAT | GO:0007411~axon guidance                                         | 2.979548867     | 2.16E-08   |
| GOTERM_BP_FAT | GO:0031175~neuron projection development                         | 2.271336146     | 2.19E-08   |
| GOTERM_BP_FAT | GO:0000904~cell morphogenesis involved in                        | 2.209543485     | 4.70E-08   |

|               |                                             |             |          |
|---------------|---------------------------------------------|-------------|----------|
|               | differentiation                             |             |          |
| GOTERM_BP_FAT | GO:0007409~axonogenesis                     | 2.535953318 | 7.85E-08 |
| GOTERM_BP_FAT | GO:0048858~cell projection morphogenesis    | 2.147218368 | 1.11E-07 |
| GOTERM_BP_FAT | GO:0030030~cell projection organization     | 2.051434479 | 1.63E-07 |
| GOTERM_BP_FAT | GO:0032990~cell part morphogenesis          | 2.102474257 | 2.45E-07 |
| GOTERM_BP_FAT | GO:0032989~cellular component morphogenesis | 1.83664654  | 3.76E-07 |

#### Cluster 3

| Category        | Term                                                       | Fold Enrichment | Bonferroni |
|-----------------|------------------------------------------------------------|-----------------|------------|
| GOTERM_MF_FAT   | GO:0030528~transcription regulator activity                | 1.757531472     | 7.09E-09   |
| SP_PIR_KEYWORDS | transcription regulation                                   | 2.081635007     | 5.86E-09   |
| GOTERM_BP_FAT   | GO:0045449~regulation of transcription                     | 1.67582397      | 5.43E-08   |
| GOTERM_MF_FAT   | GO:0003677~DNA binding                                     | 1.623340212     | 1.67E-07   |
| SP_PIR_KEYWORDS | Transcription                                              | 2.003790177     | 8.10E-08   |
| GOTERM_BP_FAT   | GO:0051252~regulation of RNA metabolic process             | 1.702053438     | 6.48E-07   |
| GOTERM_MF_FAT   | GO:0003700~transcription factor activity                   | 1.956755528     | 4.17E-07   |
| GOTERM_BP_FAT   | GO:0006355~regulation of transcription, DNA-dependent      | 1.727274706     | 1.72E-06   |
| GOTERM_BP_FAT   | GO:0006350~transcription                                   | 1.861618294     | 1.83E-06   |
| SP_PIR_KEYWORDS | nucleus                                                    | 1.604081705     | 4.57E-07   |
| SP_PIR_KEYWORDS | dna-binding                                                | 1.910170608     | 7.81E-07   |
| GOTERM_MF_FAT   | GO:0043565~sequence-specific DNA binding                   | 2.09219313      | 1.04E-04   |
| GOTERM_MF_FAT   | GO:0003702~RNA polymerase II transcription factor activity | 2.008564611     | 1.52E-04   |
| SP_PIR_KEYWORDS | DNA binding                                                | 2.502069372     | 2.78E-04   |

#### Cluster 4

| Category      | Term                            | Fold Enrichment | Bonferroni |
|---------------|---------------------------------|-----------------|------------|
| GOTERM_BP_FAT | GO:0006928~cell motion          | 2.512759957     | 2.75E-13   |
| GOTERM_BP_FAT | GO:0016477~cell migration       | 2.46654828      | 6.42E-06   |
| GOTERM_BP_FAT | GO:0048870~cell motility        | 2.355374599     | 2.29E-05   |
| GOTERM_BP_FAT | GO:0051674~localization of cell | 2.247219643     | 1.18E-04   |

#### Cluster 5

| Category      | Term                                      | Fold Enrichment | Bonferroni |
|---------------|-------------------------------------------|-----------------|------------|
| GOTERM_BP_FAT | GO:0048729~tissue morphogenesis           | 2.567835109     | 6.39E-11   |
| GOTERM_BP_FAT | GO:0002009~morphogenesis of an epithelium | 2.42739672      | 7.15E-08   |
| GOTERM_BP_FAT | GO:0060429~epithelium development         | 2.361588778     | 1.71E-07   |
| GOTERM_BP_FAT | GO:0048598~embryonic morphogenesis        | 2.33869938      | 7.90E-07   |

| Cluster 6     |                                               |                 |             |
|---------------|-----------------------------------------------|-----------------|-------------|
| Category      | Term                                          | Fold Enrichment | Bonferroni  |
| GOTERM_BP_FAT | GO:0007423~sensory organ development          | 2.105589995     | 7.98E-10    |
| GOTERM_BP_FAT | GO:0042461~photoreceptor cell development     | 3.775329        | 2.64E-06    |
| GOTERM_BP_FAT | GO:0001654~eye development                    | 2.016541193     | 4.49E-06    |
| GOTERM_BP_FAT | GO:0048749~compound eye development           | 2.059270363     | 4.97E-06    |
| Cluster 7     |                                               |                 |             |
| Category      | Term                                          | Fold Enrichment | Bonferroni  |
| GOTERM_BP_FAT | GO:0007155~cell adhesion                      | 2.430096827     | 1.62E-05    |
| GOTERM_BP_FAT | GO:0022610~biological adhesion                | 2.24913217      | 2.23E-04    |
| Cluster 8     |                                               |                 |             |
| Category      | Term                                          | Fold Enrichment | Bonferroni  |
| GOTERM_BP_FAT | GO:0007292~female gamete generation           | 1.629522346     | 0.001014734 |
| GOTERM_BP_FAT | GO:0003006~reproductive developmental process | 1.653882599     | 0.001207502 |
| Cluster 9     |                                               |                 |             |
| Category      | Term                                          | Fold Enrichment | Bonferroni  |
| GOTERM_BP_FAT | GO:0009953~dorsal/ventral pattern formation   | 2.4795988       | 4.47E-04    |
| Cluster 10    |                                               |                 |             |
| Category      | Term                                          | Fold Enrichment | Bonferroni  |
| GOTERM_BP_FAT | GO:0048645~organ formation                    | 4.184322974     | 2.01E-04    |
| GOTERM_BP_FAT | GO:0010160~formation of organ boundary        | 4.172732052     | 5.14E-04    |
| Cluster 11    |                                               |                 |             |
| Category      | Term                                          | Fold Enrichment | Bonferroni  |
| GOTERM_BP_FAT | GO:0007424~open tracheal system development   | 2.648487882     | 1.78E-06    |
| GOTERM_BP_FAT | GO:0060541~respiratory system development     | 2.648487882     | 1.78E-06    |
| Cluster 12    |                                               |                 |             |
| Category      | Term                                          | Fold Enrichment | Bonferroni  |
| GOTERM_BP_FAT | GO:0048732~gland development                  | 2.377916834     | 1.52E-04    |
| GOTERM_BP_FAT | GO:0035272~exocrine system development        | 2.471618266     | 3.28E-04    |
| GOTERM_BP_FAT | GO:0007431~salivary gland development         | 2.471618266     | 3.28E-04    |
| Cluster 13    |                                               |                 |             |
| Category      | Term                                          | Fold Enrichment | Bonferroni  |



|               |                                                 |             |          |
|---------------|-------------------------------------------------|-------------|----------|
| GOTERM_BP_FAT | GO:0007389~pattern specification process        | 2.20227525  | 1.53E-14 |
| GOTERM_BP_FAT | GO:0003002~regionalization                      | 2.211976903 | 8.36E-14 |
| GOTERM_BP_FAT | GO:0009952~anterior/posterior pattern formation | 2.331820853 | 1.96E-04 |

#### Cluster 14

| Category      | Term                                                        | Fold Enrichment | Bonferroni  |
|---------------|-------------------------------------------------------------|-----------------|-------------|
| GOTERM_BP_FAT | GO:0051960~regulation of nervous system development         | 2.936367        | 2.20E-04    |
| GOTERM_BP_FAT | GO:0050767~regulation of neurogenesis                       | 3.155498865     | 0.001335707 |
| GOTERM_BP_FAT | GO:0060284~regulation of cell development                   | 2.420821649     | 0.001865557 |
| GOTERM_BP_FAT | GO:0045664~regulation of neuron differentiation             | 3.0994985       | 0.035862728 |
| GOTERM_BP_FAT | GO:0046532~regulation of photoreceptor cell differentiation | 4.614290999     | 0.086528316 |

#### Cluster 15

| Category      | Term                                     | Fold Enrichment | Bonferroni |
|---------------|------------------------------------------|-----------------|------------|
| GOTERM_MF_FAT | GO:0043565~sequence-specific DNA binding | 2.09219313      | 1.04E-04   |

#### Cluster 16

| Category      | Term                                                   | Fold Enrichment | Bonferroni |
|---------------|--------------------------------------------------------|-----------------|------------|
| GOTERM_BP_FAT | GO:0045596~negative regulation of cell differentiation | 3.05382168      | 8.21E-04   |

**Table S6 PANTHER analysis of Yan datasets.** PANTHER (Thomas et al., 2003) was used to perform pathway analysis of genes assigned to Yan-bound regions at stage 5-7 and stage 11 and of genes assigned to Yan-bound regions in the *D. virilis* datasets. Only Bonferroni-corrected p-values of <0.005 were considered significant.

| Pathway                                                                        | Stage 5-7 |          |            |          | Stage 11 |          |            |          | D. virilis |          |            |          |
|--------------------------------------------------------------------------------|-----------|----------|------------|----------|----------|----------|------------|----------|------------|----------|------------|----------|
|                                                                                | Counts    | Expected | Over/Under | p-value  | Counts   | Expected | Over/Under | p-value  | Counts     | Expected | Over/Under | p-value  |
| Notch signaling pathway                                                        | 13        | 2.53     | +          | 2.56E-06 | 13       | 2.53     | +          | 2.64E-06 | 11         | 2.18     | +          | 1.79E-05 |
| Wnt signaling pathway                                                          | 27        | 13.43    | +          | 6.83E-04 | 36       | 13.47    | +          | 2.25E-07 | 20         | 11.26    | +          | 1.14E-02 |
| Ras Pathway                                                                    | 10        | 3.23     | +          | 1.86E-03 | 7        | 3.24     | +          | 4.70E-02 | 6          | 2.45     | +          | 3.83E-02 |
| Insulin/IGF pathway-mitogen activated protein kinase kinase/MAP kinase cascade | 9         | 3.54     | +          | 1.04E-02 | 8        | 3.55     | +          | 2.84E-02 | 6          | 1.22     | +          | 1.63E-03 |
| p53 pathway                                                                    | 11        | 4.04     | +          | 3.01E-03 | 7        | 4.05     | +          | 1.16E-01 | 7          | 3.75     | +          | 8.64E-02 |
| TGF-beta signaling pathway                                                     | 12        | 5.86     | +          | 1.69E-02 | 16       | 5.88     | +          | 3.94E-04 | 10         | 4.8      | +          | 2.50E-02 |
| PDGF signaling pathway                                                         | 10        | 5.66     | +          | 6.19E-02 | 11       | 5.67     | +          | 3.03E-02 | 12         | 4.89     | +          | 4.51E-03 |
| Interleukin signaling pathway                                                  | 8         | 3.84     | +          | 4.19E-02 | 10       | 3.85     | +          | 6.24E-03 | 8          | 2.97     | +          | 1.11E-02 |
| Cadherin signaling pathway                                                     | 11        | 5.45     | +          | 2.37E-02 | 15       | 5.47     | +          | 5.50E-04 | 10         | 4.45     | +          | 1.59E-02 |
| Angiogenesis                                                                   | 11        | 6.26     | +          | 5.40E-02 | 15       | 6.28     | +          | 2.10E-03 | 9          | 5.06     | +          | 7.20E-02 |
| Glutamine glutamate conversion                                                 | 2         | 0.4      | +          | 6.26E-02 | 3        | 0.41     | +          | 8.20E-03 | 0          | 0.35     | -          | 7.05E-01 |
| Alzheimer disease-presenilin pathway                                           | 7         | 3.94     | +          | 1.04E-01 | 12       | 3.95     | +          | 8.07E-04 | 3          | 2.71     | +          | 5.08E-01 |

**Table S7 GO analysis implicates Yan HDRs in multiple aspects of development.** DAVID was used to perform GO analysis of genes assigned as single-peak (A), multiple-peak (B), or high-density genes (C; see Materials and Methods for details on assigning genes) at stage 11 of embryogenesis. Only clusters that contain a GO-term with a p-value <0.0001 (Bonferroni-corrected) are shown.

| <b>A. Stg11 single peak genes +/- 3kb from Yan bound region</b> |                                                         |                 |                    |
|-----------------------------------------------------------------|---------------------------------------------------------|-----------------|--------------------|
| Cluster 1                                                       |                                                         |                 |                    |
| Category                                                        | Term                                                    | Fold Enrichment | Bonferroni         |
| GOTERM_CC_FAT                                                   | GO:0043232~intracellular non-membrane-bounded organelle | 1.334179681     | <b>0.019328277</b> |
| Cluster 2                                                       |                                                         |                 |                    |
| Category                                                        | Term                                                    | Fold Enrichment | Bonferroni         |
| GOTERM_MF_FAT                                                   | GO:0030528~transcription regulator activity             | 1.42692377      | <b>0.057959603</b> |
| Cluster 3                                                       |                                                         |                 |                    |
| Category                                                        | Term                                                    | Fold Enrichment | Bonferroni         |
| GOTERM_CC_FAT                                                   | GO:0022626~cytosolic ribosome                           | 2.494825855     | <b>0.005017369</b> |
| <b>B. Stg11 multiple peaks +/- 3kb from Yan bound region</b>    |                                                         |                 |                    |
| Cluster 1                                                       |                                                         |                 |                    |
| Category                                                        | Term                                                    | Fold Enrichment | Bonferroni         |
| SP_PIR_KEYWORDS                                                 | dna-binding                                             | 3.823803027     | 8.88E-16           |
| SP_PIR_KEYWORDS                                                 | nucleus                                                 | 2.607485814     | 4.40E-13           |
| GOTERM_MF_FAT                                                   | GO:0003700~transcription factor activity                | 3.321992784     | 1.59E-12           |
| GOTERM_BP_FAT                                                   | GO:0045449~regulation of transcription                  | 2.499234712     | 1.25E-11           |
| GOTERM_MF_FAT                                                   | GO:0030528~transcription regulator activity             | 2.549370415     | 1.66E-11           |
| GOTERM_MF_FAT                                                   | GO:0003677~DNA binding                                  | 2.292939116     | 2.44E-10           |

|                 |                                                               |             |             |
|-----------------|---------------------------------------------------------------|-------------|-------------|
| SP_PIR_KEYWORDS | transcription regulation                                      | 3.397375924 | 1.23E-10    |
| GOTERM_MF_FAT   | GO:0043565~sequence-specific<br>DNA binding                   | 3.881873307 | 5.95E-10    |
| SP_PIR_KEYWORDS | Homeobox                                                      | 6.455570292 | 3.24E-10    |
| INTERPRO        | IPR017970:Homeobox,<br>conserved site                         | 6.136061542 | 7.21E-09    |
| SP_PIR_KEYWORDS | Transcription                                                 | 3.203145565 | 3.15E-09    |
| INTERPRO        | IPR001356:Homeobox                                            | 5.835274211 | 2.09E-08    |
| GOTERM_BP_FAT   | GO:0006355~regulation of<br>transcription, DNA-dependent      | 2.478144124 | 8.30E-08    |
| INTERPRO        | IPR012287:Homeodomain-<br>related                             | 5.615075184 | 4.67E-08    |
| GOTERM_BP_FAT   | GO:0051252~regulation of RNA<br>metabolic process             | 2.311472484 | 6.36E-07    |
| GOTERM_BP_FAT   | GO:0006350~transcription                                      | 2.533213993 | 1.34E-05    |
| SMART           | SM00389:HOX                                                   | 4.216142271 | 1.80E-06    |
| SP_PIR_KEYWORDS | DNA binding                                                   | 4.77607233  | 2.90E-06    |
| GOTERM_MF_FAT   | GO:0003702~RNA polymerase<br>II transcription factor activity | 2.651248715 | 0.001801188 |

Cluster 2

| Category      | Term                                             | Fold Enrichment | Bonferroni |
|---------------|--------------------------------------------------|-----------------|------------|
| GOTERM_BP_FAT | GO:0048569~post-embryonic<br>organ development   | 3.829859101     | 1.63E-11   |
| GOTERM_BP_FAT | GO:0048563~post-embryonic<br>organ morphogenesis | 3.827162017     | 7.53E-11   |
| GOTERM_BP_FAT | GO:0007560~imaginal disc<br>morphogenesis        | 3.827162017     | 7.53E-11   |
| GOTERM_BP_FAT | GO:0007444~imaginal disc<br>development          | 3.128957702     | 6.67E-10   |
| GOTERM_BP_FAT | GO:0007552~metamorphosis                         | 3.142177218     | 1.92E-08   |
| GOTERM_BP_FAT | GO:0009886~post-embryonic                        | 3.150682954     | 3.15E-08   |

|               |                                                          |             |          |
|---------------|----------------------------------------------------------|-------------|----------|
|               | morphogenesis                                            |             |          |
| GOTERM_BP_FAT | GO:0009791~post-embryonic development                    | 2.853862749 | 6.22E-08 |
| GOTERM_BP_FAT | GO:0048707~instar larval or pupal morphogenesis          | 3.13231704  | 6.82E-08 |
| GOTERM_BP_FAT | GO:0002165~instar larval or pupal development            | 2.842158596 | 2.01E-07 |
| GOTERM_BP_FAT | GO:0035114~imaginal disc-derived appendage morphogenesis | 3.490139381 | 1.33E-06 |
| GOTERM_BP_FAT | GO:0035107~appendage morphogenesis                       | 3.446873191 | 1.83E-06 |
| GOTERM_BP_FAT | GO:0048737~imaginal disc-derived appendage development   | 3.432688527 | 2.04E-06 |
| GOTERM_BP_FAT | GO:0048736~appendage development                         | 3.390826472 | 2.79E-06 |
| GOTERM_BP_FAT | GO:0035120~post-embryonic appendage morphogenesis        | 3.311406559 | 3.11E-05 |
| GOTERM_BP_FAT | GO:0035220~wing disc development                         | 2.878527552 | 2.52E-04 |
| GOTERM_BP_FAT | GO:0007476~imaginal disc-derived wing morphogenesis      | 3.130646292 | 5.78E-04 |
| GOTERM_BP_FAT | GO:0007472~wing disc morphogenesis                       | 3.102185871 | 6.92E-04 |

### Cluster 3

| Category      | Term                                 | Fold Enrichment | Bonferroni |
|---------------|--------------------------------------|-----------------|------------|
| GOTERM_BP_FAT | GO:0007423~sensory organ development | 3.452477862     | 5.00E-13   |
| GOTERM_BP_FAT | GO:0001654~eye development           | 3.426108894     | 9.42E-10   |
| GOTERM_BP_FAT | GO:0048749~compound eye development  | 3.5289416       | 1.27E-09   |

|               |                                                                  |             |          |
|---------------|------------------------------------------------------------------|-------------|----------|
| GOTERM_BP_FAT | GO:0048592~eye<br>morphogenesis                                  | 3.382804916 | 4.53E-07 |
| GOTERM_BP_FAT | GO:0001745~compound eye<br>morphogenesis                         | 3.437681529 | 1.04E-06 |
| GOTERM_BP_FAT | GO:0046530~photoreceptor<br>cell differentiation                 | 4.344496417 | 3.34E-05 |
| GOTERM_BP_FAT | GO:0001754~eye<br>photoreceptor cell<br>differentiation          | 4.358115528 | 1.64E-04 |
| GOTERM_BP_FAT | GO:0001751~compound eye<br>photoreceptor cell<br>differentiation | 4.326705687 | 4.16E-04 |

Cluster 4

| Category      | Term                                                            | Fold Enrichment | Bonferroni |
|---------------|-----------------------------------------------------------------|-----------------|------------|
| GOTERM_BP_FAT | GO:0035114~imaginal disc-<br>derived appendage<br>morphogenesis | 3.490139381     | 1.33E-06   |
| GOTERM_BP_FAT | GO:0035107~appendage<br>morphogenesis                           | 3.446873191     | 1.83E-06   |
| GOTERM_BP_FAT | GO:0048737~imaginal disc-<br>derived appendage<br>development   | 3.432688527     | 2.04E-06   |
| GOTERM_BP_FAT | GO:0048736~appendage<br>development                             | 3.390826472     | 2.79E-06   |
| GOTERM_BP_FAT | GO:0035110~leg<br>morphogenesis                                 | 8.425690021     | 2.58E-05   |
| GOTERM_BP_FAT | GO:0035120~post-embryonic<br>appendage morphogenesis            | 3.311406559     | 3.11E-05   |
| GOTERM_BP_FAT | GO:0035108~limb<br>morphogenesis                                | 8.215047771     | 3.56E-05   |
| GOTERM_BP_FAT | GO:0060173~limb<br>development                                  | 8.215047771     | 3.56E-05   |

## Cluster 5

| Category      | Term                                     | Fold Enrichment | Bonferroni |
|---------------|------------------------------------------|-----------------|------------|
| GOTERM_BP_FAT | GO:0003002~regionalization               | 2.616789192     | 3.10E-06   |
| GOTERM_BP_FAT | GO:0007389~pattern specification process | 2.475046444     | 1.84E-05   |

## Cluster 6

| Category      | Term                                       | Fold Enrichment | Bonferroni |
|---------------|--------------------------------------------|-----------------|------------|
| GOTERM_BP_FAT | GO:0007498~mesoderm development            | 4.999860013     | 1.07E-04   |
| GOTERM_BP_FAT | GO:0001704~formation of primary germ layer | 9.268259023     | 1.76E-04   |
| GOTERM_BP_FAT | GO:0048598~embryonic morphogenesis         | 3.131672397     | 3.30E-04   |
| GOTERM_BP_FAT | GO:0001707~mesoderm formation              | 9.721950024     | 5.33E-04   |
| GOTERM_BP_FAT | GO:0048332~mesoderm morphogenesis          | 9.361877801     | 7.72E-04   |

## Cluster 7

| Category      | Term                                        | Fold Enrichment | Bonferroni  |
|---------------|---------------------------------------------|-----------------|-------------|
| GOTERM_BP_FAT | GO:0030182~neuron differentiation           | 3.090106365     | 1.94E-09    |
| GOTERM_BP_FAT | GO:0006928~cell motion                      | 3.066398663     | 3.80E-06    |
| GOTERM_BP_FAT | GO:0000902~cell morphogenesis               | 2.516269418     | 3.76E-05    |
| GOTERM_BP_FAT | GO:0048666~neuron development               | 2.695249546     | 1.16E-04    |
| GOTERM_BP_FAT | GO:0032989~cellular component morphogenesis | 2.195884465     | 0.001274019 |
| GOTERM_BP_FAT | GO:0000904~cell morphogenesis involved in   | 2.669525551     | 0.001330054 |

differentiation

Cluster 8

| Category      | Term                            | Fold Enrichment | Bonferroni |
|---------------|---------------------------------|-----------------|------------|
| GOTERM_BP_FAT | GO:0048729~tissue morphogenesis | 3.581771062     | 1.77E-07   |

---

**C. Stg 11 high-density genes +/- 3kb from Yan bound region**

---

Cluster 1

---

| Category      | Term                                            | Fold Enrichment | Bonferroni |
|---------------|-------------------------------------------------|-----------------|------------|
| GOTERM_BP_FAT | GO:0007389~pattern specification process        | 4.152904186     | 3.68E-37   |
| GOTERM_BP_FAT | GO:0007444~imaginal disc development            | 4.438839426     | 2.92E-36   |
| GOTERM_BP_FAT | GO:0003002~regionalization                      | 4.108761851     | 6.33E-34   |
| GOTERM_BP_FAT | GO:0048569~post-embryonic organ development     | 4.987641391     | 2.90E-32   |
| GOTERM_BP_FAT | GO:0009791~post-embryonic development           | 3.918861093     | 1.06E-28   |
| GOTERM_BP_FAT | GO:0048563~post-embryonic organ morphogenesis   | 4.700793471     | 8.08E-27   |
| GOTERM_BP_FAT | GO:0007560~imaginal disc morphogenesis          | 4.700793471     | 8.08E-27   |
| GOTERM_BP_FAT | GO:0009886~post-embryonic morphogenesis         | 4.19640083      | 1.55E-26   |
| GOTERM_BP_FAT | GO:0048707~instar larval or pupal morphogenesis | 4.216257852     | 2.66E-26   |
| GOTERM_BP_FAT | GO:0007552~metamorphosis                        | 4.041551035     | 5.66E-25   |
| GOTERM_BP_FAT | GO:0048736~appendage development                | 4.832199993     | 3.60E-24   |
| GOTERM_BP_FAT | GO:0002165~instar larval or pupal development   | 3.718855423     | 4.16E-24   |
| GOTERM_BP_FAT | GO:0035220~wing disc                            | 4.490652213     | 7.74E-24   |



|               |                                                          |             |          |
|---------------|----------------------------------------------------------|-------------|----------|
|               | development                                              |             |          |
| GOTERM_BP_FAT | GO:0035107~appendage morphogenesis                       | 4.836500743 | 9.22E-24 |
| GOTERM_BP_FAT | GO:0048737~imaginal disc-derived appendage development   | 4.816597447 | 1.18E-23 |
| GOTERM_BP_FAT | GO:0035114~imaginal disc-derived appendage morphogenesis | 4.820691051 | 3.03E-23 |
| GOTERM_BP_FAT | GO:0035120~post-embryonic appendage morphogenesis        | 4.871480893 | 1.19E-22 |
| GOTERM_BP_FAT | GO:0007476~imaginal disc-derived wing morphogenesis      | 4.78172959  | 1.71E-20 |
| GOTERM_BP_FAT | GO:0007472~wing disc morphogenesis                       | 4.738259321 | 2.79E-20 |

Cluster 2

| Category        | Term                                                  | Fold Enrichment | Bonferroni |
|-----------------|-------------------------------------------------------|-----------------|------------|
| SP_PIR_KEYWORDS | developmental protein                                 | 4.994181682     | 1.37E-50   |
| SP_PIR_KEYWORDS | dna-binding                                           | 4.627001102     | 3.15E-32   |
| GOTERM_MF_FAT   | GO:0030528~transcription regulator activity           | 3.194881365     | 7.20E-28   |
| GOTERM_BP_FAT   | GO:0045449~regulation of transcription                | 2.838190595     | 1.33E-25   |
| GOTERM_MF_FAT   | GO:0003677~DNA binding                                | 2.812705367     | 6.12E-25   |
| GOTERM_MF_FAT   | GO:0003700~transcription factor activity              | 3.950923113     | 1.77E-24   |
| GOTERM_BP_FAT   | GO:0006355~regulation of transcription, DNA-dependent | 3.107767838     | 8.59E-24   |
| GOTERM_BP_FAT   | GO:0051252~regulation of RNA metabolic process        | 2.886162201     | 6.87E-22   |
| SP_PIR_KEYWORDS | nucleus                                               | 2.699709203     | 2.60E-19   |
| SP_PIR_KEYWORDS | transcription regulation                              | 3.739262518     | 3.52E-18   |

|                 |                                                               |             |          |
|-----------------|---------------------------------------------------------------|-------------|----------|
| GOTERM_MF_FAT   | GO:0003702~RNA polymerase<br>II transcription factor activity | 4.087725504 | 2.02E-16 |
| SP_PIR_KEYWORDS | Transcription                                                 | 3.459012448 | 3.00E-15 |
| GOTERM_BP_FAT   | GO:0006350~transcription                                      | 2.629649709 | 7.04E-10 |

Cluster 3

| Category      | Term                                                                   | Fold Enrichment | Bonferroni |
|---------------|------------------------------------------------------------------------|-----------------|------------|
| GOTERM_BP_FAT | GO:0000902~cell<br>morphogenesis                                       | 3.84793148      | 4.80E-28   |
| GOTERM_BP_FAT | GO:0030182~neuron<br>differentiation                                   | 3.979544353     | 8.89E-28   |
| GOTERM_BP_FAT | GO:0048666~neuron<br>development                                       | 4.163554629     | 1.59E-25   |
| GOTERM_BP_FAT | GO:0032989~cellular<br>component morphogenesis                         | 3.424590324     | 3.18E-25   |
| GOTERM_BP_FAT | GO:0006928~cell motion                                                 | 4.257210848     | 3.91E-23   |
| GOTERM_BP_FAT | GO:0048812~neuron projection<br>morphogenesis                          | 4.348200187     | 1.47E-22   |
| GOTERM_BP_FAT | GO:0031175~neuron projection<br>development                            | 4.333049664     | 1.83E-22   |
| GOTERM_BP_FAT | GO:0000904~cell<br>morphogenesis involved in<br>differentiation        | 4.164598257     | 8.93E-22   |
| GOTERM_BP_FAT | GO:0030030~cell projection<br>organization                             | 3.807916167     | 8.93E-22   |
| GOTERM_BP_FAT | GO:0048667~cell<br>morphogenesis involved in<br>neuron differentiation | 4.254504288     | 1.36E-21   |
| GOTERM_BP_FAT | GO:0048858~cell projection<br>morphogenesis                            | 4.000504032     | 4.66E-21   |
| GOTERM_BP_FAT | GO:0032990~cell part<br>morphogenesis                                  | 3.867556768     | 3.72E-20   |
| GOTERM_BP_FAT | GO:0007409~axonogenesis                                                | 4.895277661     | 2.54E-19   |

|               |                          |             |          |
|---------------|--------------------------|-------------|----------|
| GOTERM_BP_FAT | GO:0007411~axon guidance | 5.109887503 | 1.99E-13 |
|---------------|--------------------------|-------------|----------|

Cluster 4

| Category      | Term                                                             | Fold Enrichment | Bonferroni |
|---------------|------------------------------------------------------------------|-----------------|------------|
| GOTERM_BP_FAT | GO:0048729~tissue morphogenesis                                  | 4.738595869     | 3.18E-23   |
| GOTERM_BP_FAT | GO:0002009~morphogenesis of an epithelium                        | 4.795524834     | 2.09E-21   |
| GOTERM_BP_FAT | GO:0060429~epithelium development                                | 4.591459947     | 2.30E-20   |
| GOTERM_BP_FAT | GO:0048598~embryonic morphogenesis                               | 4.612464826     | 1.17E-19   |
| GOTERM_BP_FAT | GO:0001700~embryonic development via the syncytial blastoderm    | 4.101985443     | 7.66E-14   |
| GOTERM_BP_FAT | GO:0009792~embryonic development ending in birth or egg hatching | 3.918861093     | 7.95E-13   |
| GOTERM_BP_FAT | GO:0016331~morphogenesis of embryonic epithelium                 | 5.181605223     | 5.17E-12   |
| GOTERM_BP_FAT | GO:0007391~dorsal closure                                        | 5.582658259     | 1.02E-10   |

Cluster 5

| Category      | Term                                    | Fold Enrichment | Bonferroni |
|---------------|-----------------------------------------|-----------------|------------|
| GOTERM_BP_FAT | GO:0048732~gland development            | 5.497625173     | 5.39E-20   |
| GOTERM_BP_FAT | GO:0007431~salivary gland development   | 5.262739117     | 5.37E-15   |
| GOTERM_BP_FAT | GO:0035272~exocrine system development  | 5.262739117     | 5.37E-15   |
| GOTERM_BP_FAT | GO:0007435~salivary gland morphogenesis | 4.170951572     | 2.58E-06   |
| GOTERM_BP_FAT | GO:0022612~gland                        | 4.170951572     | 2.58E-06   |

morphogenesis

Cluster 6

| Category      | Term                                                       | Fold Enrichment | Bonferroni |
|---------------|------------------------------------------------------------|-----------------|------------|
| GOTERM_BP_FAT | GO:0007447~imaginal disc pattern formation                 | 7.62000768      | 1.18E-21   |
| GOTERM_BP_FAT | GO:0009953~dorsal/ventral pattern formation                | 4.876804916     | 5.17E-12   |
| GOTERM_BP_FAT | GO:0035222~wing disc pattern formation                     | 6.992477636     | 7.15E-12   |
| GOTERM_BP_FAT | GO:0007450~dorsal/ventral pattern formation, imaginal disc | 7.05853343      | 1.14E-09   |
| GOTERM_BP_FAT | GO:0048190~wing disc dorsal/ventral pattern formation      | 6.583686636     | 8.18E-07   |

Cluster 7

| Category      | Term                                                                        | Fold Enrichment | Bonferroni |
|---------------|-----------------------------------------------------------------------------|-----------------|------------|
| GOTERM_BP_FAT | GO:0007167~enzyme linked receptor protein signaling pathway                 | 4.918846337     | 1.99E-13   |
| GOTERM_BP_FAT | GO:0007166~cell surface receptor linked signal transduction                 | 2.446168071     | 1.23E-11   |
| GOTERM_BP_FAT | GO:0007169~transmembrane receptor protein tyrosine kinase signaling pathway | 5.36895954      | 1.31E-11   |
| GOTERM_BP_FAT | GO:0007173~epidermal growth factor receptor signaling pathway               | 8.636008705     | 2.24E-08   |

Cluster 8

| Category      | Term                            | Fold Enrichment | Bonferroni |
|---------------|---------------------------------|-----------------|------------|
| GOTERM_BP_FAT | GO:0006928~cell motion          | 4.257210848     | 3.91E-23   |
| GOTERM_BP_FAT | GO:0016477~cell migration       | 4.389124424     | 9.94E-13   |
| GOTERM_BP_FAT | GO:0048870~cell motility        | 4.107469381     | 1.11E-11   |
| GOTERM_BP_FAT | GO:0051674~localization of cell | 4.012167309     | 1.21E-11   |

Cluster 9

| Category      | Term                                                        | Fold Enrichment | Bonferroni |
|---------------|-------------------------------------------------------------|-----------------|------------|
| GOTERM_BP_FAT | GO:0007449~proximal/distal pattern formation, imaginal disc | 14.80458635     | 1.99E-13   |
| GOTERM_BP_FAT | GO:0009954~proximal/distal pattern formation                | 13.51723102     | 1.39E-12   |
| GOTERM_BP_FAT | GO:0035218~leg disc development                             | 8.247537725     | 6.16E-12   |
| GOTERM_BP_FAT | GO:0035223~leg disc pattern formation                       | 14.85901498     | 1.60E-09   |
| GOTERM_BP_FAT | GO:0007479~leg disc proximal/distal pattern formation       | 14.85901498     | 1.60E-09   |
| GOTERM_BP_FAT | GO:0007474~imaginal disc-derived wing vein specification    | 8.001008065     | 7.62E-06   |

Cluster 10

| Category      | Term                                 | Fold Enrichment | Bonferroni |
|---------------|--------------------------------------|-----------------|------------|
| GOTERM_BP_FAT | GO:0007423~sensory organ development | 3.523788918     | 1.62E-20   |
| GOTERM_BP_FAT | GO:0001654~eye development           | 3.470316751     | 2.86E-15   |
| GOTERM_BP_FAT | GO:0048749~compound eye development  | 3.384470944     | 7.95E-13   |
| GOTERM_BP_FAT | GO:0048592~eye morphogenesis         | 3.127319137     | 1.43E-08   |

|               |                                                            |             |          |
|---------------|------------------------------------------------------------|-------------|----------|
| GOTERM_BP_FAT | GO:0001745~compound eye morphogenesis                      | 3.072387097 | 2.46E-07 |
| GOTERM_BP_FAT | GO:0046530~photoreceptor cell differentiation              | 4.143379176 | 2.76E-07 |
| GOTERM_BP_FAT | GO:0001751~compound eye photoreceptor cell differentiation | 3.954166148 | 3.74E-05 |
| GOTERM_BP_FAT | GO:0001754~eye photoreceptor cell differentiation          | 3.783727952 | 8.95E-05 |

#### Cluster 11

| Category        | Term                                     | Fold Enrichment | Bonferroni |
|-----------------|------------------------------------------|-----------------|------------|
| SP_PIR_KEYWORDS | Homeobox                                 | 6.113890333     | 2.26E-12   |
| INTERPRO        | IPR001356:Homeobox                       | 5.575501914     | 1.99E-10   |
| INTERPRO        | IPR017970:Homeobox, conserved site       | 5.653509673     | 4.02E-10   |
| GOTERM_MF_FAT   | GO:0043565~sequence-specific DNA binding | 3.55256917      | 5.60E-10   |
| INTERPRO        | IPR012287:Homeodomain-related            | 5.1734947       | 3.76E-09   |
| UP_SEQ_FEATURE  | DNA-binding region:Homeobox              | 5.542986425     | 6.95E-08   |
| SMART           | SM00389:HOX                              | 4.138235294     | 3.22E-08   |

#### Cluster 12

| Category      | Term                                        | Fold Enrichment | Bonferroni |
|---------------|---------------------------------------------|-----------------|------------|
| GOTERM_BP_FAT | GO:0048645~organ formation                  | 10.05841014     | 1.99E-13   |
| GOTERM_BP_FAT | GO:0010160~formation of organ boundary      | 10.1065365      | 7.95E-13   |
| GOTERM_BP_FAT | GO:0048859~formation of anatomical boundary | 9.144009217     | 2.19E-12   |
| GOTERM_BP_FAT | GO:0008052~sensory organ                    | 9.541574835     | 1.50E-05   |

|               |                                                     |             |          |
|---------------|-----------------------------------------------------|-------------|----------|
|               | boundary specification                              |             |          |
|               | GO:0016360~sensory organ                            |             |          |
| GOTERM_BP_FAT | precursor cell fate<br>determination                | 9.62527286  | 4.00E-04 |
| GOTERM_BP_FAT | GO:0007432~salivary gland<br>boundary specification | 10.97281106 | 6.04E-04 |

Cluster 13

| Category      | Term                                                                    | Fold Enrichment | Bonferroni |
|---------------|-------------------------------------------------------------------------|-----------------|------------|
| GOTERM_BP_FAT | GO:0060541~respiratory<br>system development                            | 5.020240354     | 4.43E-15   |
| GOTERM_BP_FAT | GO:0007424~open tracheal<br>system development                          | 5.020240354     | 4.43E-15   |
| GOTERM_BP_FAT | GO:0035295~tube<br>development                                          | 5.541823768     | 4.25E-11   |
| GOTERM_BP_FAT | GO:0035239~tube<br>morphogenesis                                        | 5.442862629     | 1.41E-08   |
| GOTERM_BP_FAT | GO:0001763~morphogenesis of<br>a branching structure                    | 7.402293175     | 3.76E-07   |
| GOTERM_BP_FAT | GO:0048754~branching<br>morphogenesis of a tube                         | 6.564929694     | 1.25E-04   |
| GOTERM_BP_FAT | GO:0060446~branching<br>involved in open tracheal<br>system development | 6.564929694     | 1.25E-04   |
| GOTERM_BP_FAT | GO:0060562~epithelial tube<br>morphogenesis                             | 6.096006144     | 3.39E-04   |

Cluster 14

| Category      | Term                                     | Fold Enrichment | Bonferroni |
|---------------|------------------------------------------|-----------------|------------|
| GOTERM_BP_FAT | GO:0014016~neuroblast<br>differentiation | 10.45029625     | 3.10E-09   |
| GOTERM_BP_FAT | GO:0014017~neuroblast fate<br>commitment | 10.16001024     | 3.15E-08   |

|               |                                          |             |          |
|---------------|------------------------------------------|-------------|----------|
| GOTERM_BP_FAT | GO:0007400~neuroblast fate determination | 9.509769585 | 2.91E-06 |
|---------------|------------------------------------------|-------------|----------|

Cluster 15

| Category      | Term                           | Fold Enrichment | Bonferroni |
|---------------|--------------------------------|-----------------|------------|
| GOTERM_BP_FAT | GO:0007155~cell adhesion       | 3.783727952     | 1.68E-08   |
| GOTERM_BP_FAT | GO:0022610~biological adhesion | 3.501960977     | 1.66E-07   |
| GOTERM_BP_FAT | GO:0016337~cell-cell adhesion  | 6.199328282     | 2.23E-07   |

Cluster 16

| Category      | Term                                                 | Fold Enrichment | Bonferroni |
|---------------|------------------------------------------------------|-----------------|------------|
| GOTERM_BP_FAT | GO:0035215~genital disc development                  | 12.40972679     | 1.99E-13   |
| GOTERM_BP_FAT | GO:0035225~determination of genital disc primordium  | 18.28801843     | 6.74E-08   |
| GOTERM_BP_FAT | GO:0007445~determination of imaginal disc primordium | 18.28801843     | 6.74E-08   |

Cluster 17

| Category      | Term                                          | Fold Enrichment | Bonferroni |
|---------------|-----------------------------------------------|-----------------|------------|
| GOTERM_BP_FAT | GO:0030707~ovarian follicle cell development  | 3.585885967     | 5.54E-09   |
| GOTERM_BP_FAT | GO:0003006~reproductive developmental process | 2.421536038     | 2.11E-08   |
| GOTERM_BP_FAT | GO:0048610~reproductive cellular process      | 2.304290323     | 8.21E-07   |
| GOTERM_BP_FAT | GO:0007292~female gamete generation           | 2.210639591     | 1.66E-06   |
| GOTERM_BP_FAT | GO:0007276~gamete generation                  | 2.020634205     | 1.78E-06   |
| GOTERM_BP_FAT | GO:0048477~oogenesis                          | 2.205419663     | 2.54E-06   |



|               |                                                             |             |          |
|---------------|-------------------------------------------------------------|-------------|----------|
| GOTERM_BP_FAT | GO:0019953~sexual reproduction                              | 1.990532619 | 2.75E-06 |
| GOTERM_BP_FAT | GO:0048609~reproductive process in a multicellular organism | 1.880516034 | 3.75E-05 |
| GOTERM_BP_FAT | GO:0032504~multicellular organism reproduction              | 1.880516034 | 3.75E-05 |

Cluster 18

| Category      | Term                                     | Fold Enrichment | Bonferroni |
|---------------|------------------------------------------|-----------------|------------|
| GOTERM_BP_FAT | GO:0048565~gut development               | 6.513540812     | 4.89E-11   |
| GOTERM_BP_FAT | GO:0035239~tube morphogenesis            | 5.442862629     | 1.41E-08   |
| GOTERM_BP_FAT | GO:0007439~ectodermal gut development    | 7.156181126     | 1.78E-07   |
| GOTERM_BP_FAT | GO:0048567~ectodermal gut morphogenesis  | 7.156181126     | 1.78E-07   |
| GOTERM_BP_FAT | GO:0048547~gut morphogenesis             | 7.003921953     | 2.65E-07   |
| GOTERM_BP_FAT | GO:0048546~digestive tract morphogenesis | 6.858006912     | 3.90E-07   |
| GOTERM_BP_FAT | GO:0055123~digestive system development  | 6.858006912     | 3.90E-07   |
| GOTERM_BP_FAT | GO:0007442~hindgut morphogenesis         | 6.531435155     | 3.89E-05   |

Cluster 19

| Category      | Term                                                                   | Fold Enrichment | Bonferroni |
|---------------|------------------------------------------------------------------------|-----------------|------------|
| GOTERM_BP_FAT | GO:0006357~regulation of transcription from RNA polymerase II promoter | 4.191004224     | 9.94E-13   |
| GOTERM_MF_FAT | GO:0016564~transcription repressor activity                            | 5.53294412      | 4.83E-12   |

|               |                                                                                                                  |             |          |
|---------------|------------------------------------------------------------------------------------------------------------------|-------------|----------|
| GOTERM_BP_FAT | GO:0010558~negative<br>regulation of macromolecule<br>biosynthetic process                                       | 3.048003072 | 5.47E-07 |
| GOTERM_BP_FAT | GO:0031327~negative<br>regulation of cellular<br>biosynthetic process                                            | 3.011280144 | 7.97E-07 |
| GOTERM_BP_FAT | GO:0009890~negative<br>regulation of biosynthetic<br>process                                                     | 3.011280144 | 7.97E-07 |
| GOTERM_BP_FAT | GO:0000122~negative<br>regulation of transcription from<br>RNA polymerase II promoter                            | 5.696268037 | 3.44E-06 |
| GOTERM_BP_FAT | GO:0010605~negative<br>regulation of macromolecule<br>metabolic process                                          | 2.653781855 | 3.84E-06 |
| GOTERM_BP_FAT | GO:0016481~negative<br>regulation of transcription                                                               | 3.003829115 | 3.49E-05 |
| GOTERM_BP_FAT | GO:0051172~negative<br>regulation of nitrogen<br>compound metabolic process                                      | 2.788307743 | 2.21E-04 |
| GOTERM_BP_FAT | GO:0045934~negative<br>regulation of nucleobase,<br>nucleoside, nucleotide and<br>nucleic acid metabolic process | 2.788307743 | 2.21E-04 |
| GOTERM_BP_FAT | GO:0010629~negative<br>regulation of gene expression                                                             | 2.571752592 | 6.62E-04 |

Cluster 20

| Category      | Term                                                 | Fold Enrichment | Bonferroni |
|---------------|------------------------------------------------------|-----------------|------------|
| GOTERM_BP_FAT | GO:0010628~positive<br>regulation of gene expression | 4.532927646     | 2.82E-08   |
| GOTERM_BP_FAT | GO:0045941~positive<br>regulation of transcription   | 4.414349277     | 1.31E-07   |
| GOTERM_BP_FAT | GO:0051173~positive<br>regulation of nitrogen        | 4.23193815      | 3.67E-07   |

|               |                                                                                           |             |             |
|---------------|-------------------------------------------------------------------------------------------|-------------|-------------|
|               | compound metabolic process                                                                |             |             |
|               | GO:0045935~positive                                                                       |             |             |
| GOTERM_BP_FAT | regulation of nucleobase,<br>nucleoside, nucleotide and<br>nucleic acid metabolic process | 4.23193815  | 3.67E-07    |
|               | GO:0010557~positive                                                                       |             |             |
| GOTERM_BP_FAT | regulation of macromolecule<br>biosynthetic process                                       | 3.969492373 | 1.70E-06    |
|               | GO:0010604~positive                                                                       |             |             |
| GOTERM_BP_FAT | regulation of macromolecule<br>metabolic process                                          | 3.734877004 | 3.47E-06    |
|               | GO:0031328~positive                                                                       |             |             |
| GOTERM_BP_FAT | regulation of cellular<br>biosynthetic process                                            | 3.466356435 | 1.99E-05    |
|               | GO:0009891~positive                                                                       |             |             |
| GOTERM_BP_FAT | regulation of biosynthetic<br>process                                                     | 3.466356435 | 1.99E-05    |
|               | GO:0045893~positive                                                                       |             |             |
| GOTERM_BP_FAT | regulation of transcription,<br>DNA-dependent                                             | 3.948549434 | 0.001607775 |

#### Cluster 21

| Category        | Term                                  | Fold Enrichment | Bonferroni |
|-----------------|---------------------------------------|-----------------|------------|
| SP_PIR_KEYWORDS | neurogenesis                          | 8.831174925     | 3.51E-17   |
| SP_PIR_KEYWORDS | differentiation                       | 5.0703125       | 1.76E-13   |
|                 | GO:0016566~specific                   |                 |            |
| GOTERM_MF_FAT   | transcriptional repressor<br>activity | 9.186868687     | 2.32E-09   |
| UP_SEQ_FEATURE  | DNA-binding region:Basic motif        | 5.093555094     | 6.84E-04   |
| UP_SEQ_FEATURE  | domain:Helix-loop-helix motif         | 5.46875         | 8.10E-04   |

#### Cluster 22

| Category | Term | Fold Enrichment | Bonferroni |
|----------|------|-----------------|------------|
|----------|------|-----------------|------------|

|               |                                                          |             |          |
|---------------|----------------------------------------------------------|-------------|----------|
| GOTERM_BP_FAT | GO:0007163~establishment or maintenance of cell polarity | 4.362279626 | 9.42E-07 |
| GOTERM_BP_FAT | GO:0001736~establishment of planar polarity              | 5.096660875 | 1.75E-04 |
| GOTERM_BP_FAT | GO:0007164~establishment of tissue polarity              | 5.014456667 | 2.24E-04 |
| GOTERM_BP_FAT | GO:0001738~morphogenesis of a polarized epithelium       | 4.702633311 | 2.37E-04 |

#### Cluster 23

| Category      | Term                                | Fold Enrichment | Bonferroni |
|---------------|-------------------------------------|-----------------|------------|
| GOTERM_BP_FAT | GO:0001667~ameboidal cell migration | 6.858006912     | 9.14E-04   |

#### Cluster 24

| Category      | Term                                       | Fold Enrichment | Bonferroni |
|---------------|--------------------------------------------|-----------------|------------|
| GOTERM_BP_FAT | GO:0009880~embryonic pattern specification | 3.562600993     | 2.34E-10   |
| GOTERM_BP_FAT | GO:0035282~segmentation                    | 3.305911024     | 1.04E-09   |
| GOTERM_BP_FAT | GO:0007350~blastoderm segmentation         | 3.439489705     | 1.13E-08   |

#### Cluster 25

| Category      | Term                                    | Fold Enrichment | Bonferroni |
|---------------|-----------------------------------------|-----------------|------------|
| GOTERM_BP_FAT | GO:0035051~cardiac cell differentiation | 10.97281106     | 2.16E-06   |

#### Cluster 26

| Category      | Term                                          | Fold Enrichment | Bonferroni |
|---------------|-----------------------------------------------|-----------------|------------|
| GOTERM_BP_FAT | GO:0046530~photoreceptor cell differentiation | 4.143379176     | 2.76E-07   |
| GOTERM_BP_FAT | GO:0001751~compound eye                       | 3.954166148     | 3.74E-05   |

|               |                                              |             |             |
|---------------|----------------------------------------------|-------------|-------------|
|               | photoreceptor cell<br>differentiation        |             |             |
|               | GO:0001754~eye                               |             |             |
| GOTERM_BP_FAT | photoreceptor cell<br>differentiation        | 3.783727952 | 8.95E-05    |
| GOTERM_BP_FAT | GO:0042461~photoreceptor<br>cell development | 4.64457611  | 0.001722476 |

#### Cluster 27

| Category      | Term                                | Fold Enrichment | Bonferroni |
|---------------|-------------------------------------|-----------------|------------|
| GOTERM_BP_FAT | GO:0007365~periodic<br>partitioning | 5.757339136     | 2.59E-05   |

#### Cluster 28

| Category      | Term                                                                   | Fold Enrichment | Bonferroni |
|---------------|------------------------------------------------------------------------|-----------------|------------|
| GOTERM_BP_FAT | GO:0035152~regulation of tube<br>architecture, open tracheal<br>system | 6.737691002     | 8.78E-05   |
| GOTERM_BP_FAT | GO:0048871~multicellular<br>organismal homeostasis                     | 10.7576579      | 1.16E-04   |
| GOTERM_BP_FAT | GO:0001894~tissue<br>homeostasis                                       | 10.7576579      | 1.16E-04   |

#### Cluster 29

| Category      | Term                                 | Fold Enrichment | Bonferroni  |
|---------------|--------------------------------------|-----------------|-------------|
| GOTERM_BP_FAT | GO:0035218~leg disc<br>development   | 8.247537725     | 6.16E-12    |
| GOTERM_BP_FAT | GO:0007478~leg disc<br>morphogenesis | 7.079232942     | 6.30E-04    |
| GOTERM_BP_FAT | GO:0035110~leg<br>morphogenesis      | 6.096006144     | 0.001085789 |

Cluster 30

| Category      | Term                                             | Fold Enrichment | Bonferroni |
|---------------|--------------------------------------------------|-----------------|------------|
| GOTERM_BP_FAT | GO:0010453~regulation of cell fate commitment    | 10.05841014     | 4.26E-05   |
| GOTERM_BP_FAT | GO:0042659~regulation of cell fate specification | 10.05841014     | 4.26E-05   |

Cluster 31

| Category      | Term                                                       | Fold Enrichment | Bonferroni |
|---------------|------------------------------------------------------------|-----------------|------------|
| GOTERM_BP_FAT | GO:0046530~photoreceptor cell differentiation              | 4.143379176     | 2.76E-07   |
| GOTERM_BP_FAT | GO:0001751~compound eye photoreceptor cell differentiation | 3.954166148     | 3.74E-05   |
| GOTERM_BP_FAT | GO:0001754~eye photoreceptor cell differentiation          | 3.783727952     | 8.95E-05   |

Cluster 32

| Category      | Term                                   | Fold Enrichment | Bonferroni |
|---------------|----------------------------------------|-----------------|------------|
| GOTERM_BP_FAT | GO:0042692~muscle cell differentiation | 4.448436916     | 5.64E-04   |

Cluster 33

| Category      | Term                    | Fold Enrichment | Bonferroni |
|---------------|-------------------------|-----------------|------------|
| GOTERM_BP_FAT | GO:0007369~gastrulation | 4.826004864     | 6.21E-05   |

Cluster 34

| Category      | Term                         | Fold Enrichment | Bonferroni  |
|---------------|------------------------------|-----------------|-------------|
| GOTERM_BP_FAT | GO:0035287~head segmentation | 8.708580206     | 0.001152031 |

## Cluster 35

| Category      | Term                            | Fold Enrichment | Bonferroni |
|---------------|---------------------------------|-----------------|------------|
| GOTERM_BP_FAT | GO:0007498~mesoderm development | 4.823213653     | 5.95E-07   |
| GOTERM_BP_FAT | GO:0007369~gastrulation         | 4.826004864     | 6.21E-05   |

## Cluster 36

| Category        | Term           | Fold Enrichment | Bonferroni |
|-----------------|----------------|-----------------|------------|
| SP_PIR_KEYWORDS | glycoprotein   | 2.520192606     | 8.66E-07   |
| SP_PIR_KEYWORDS | disulfide bond | 2.73036716      | 1.01E-04   |

## Cluster 37

| Category      | Term                                | Fold Enrichment | Bonferroni |
|---------------|-------------------------------------|-----------------|------------|
| GOTERM_BP_FAT | GO:0008356~asymmetric cell division | 5.675591928     | 1.09E-05   |
| GOTERM_BP_FAT | GO:0051301~cell division            | 2.943924919     | 9.64E-05   |

## Cluster 38

| Category      | Term                                   | Fold Enrichment | Bonferroni |
|---------------|----------------------------------------|-----------------|------------|
| GOTERM_BP_FAT | GO:0042692~muscle cell differentiation | 4.448436916     | 5.64E-04   |

## Cluster 39

| Category      | Term                                    | Fold Enrichment | Bonferroni |
|---------------|-----------------------------------------|-----------------|------------|
| GOTERM_BP_FAT | GO:0035051~cardiac cell differentiation | 10.97281106     | 2.16E-06   |

## Cluster 40

| Category | Term | Fold Enrichment | Bonferroni |
|----------|------|-----------------|------------|
|----------|------|-----------------|------------|

|               |                                     |             |          |
|---------------|-------------------------------------|-------------|----------|
| GOTERM_BP_FAT | GO:0010941~regulation of cell death | 3.975656181 | 1.58E-05 |
|---------------|-------------------------------------|-------------|----------|

|               |                                                |             |          |
|---------------|------------------------------------------------|-------------|----------|
| GOTERM_BP_FAT | GO:0043067~regulation of programmed cell death | 3.624652302 | 7.91E-04 |
|---------------|------------------------------------------------|-------------|----------|

Cluster 41

| Category        | Term                           | Fold Enrichment | Bonferroni |
|-----------------|--------------------------------|-----------------|------------|
| SP_PIR_KEYWORDS | zinc finger                    | 6.44872814      | 8.66E-06   |
| UP_SEQ_FEATURE  | zinc finger region:C2H2-type 1 | 4.67032967      | 1.18E-04   |
| UP_SEQ_FEATURE  | zinc finger region:C2H2-type 2 | 4.576923077     | 1.62E-04   |
| SP_PIR_KEYWORDS | zinc-finger                    | 2.443944741     | 5.53E-04   |

Cluster 42

| Category      | Term                           | Fold Enrichment | Bonferroni |
|---------------|--------------------------------|-----------------|------------|
| GOTERM_BP_FAT | GO:0007548~sex differentiation | 5.181605223     | 1.36E-04   |

Cluster 43

| Category      | Term                                    | Fold Enrichment | Bonferroni |
|---------------|-----------------------------------------|-----------------|------------|
| GOTERM_BP_FAT | GO:0022612~gland morphogenesis          | 4.170951572     | 2.58E-06   |
| GOTERM_BP_FAT | GO:0007435~salivary gland morphogenesis | 4.170951572     | 2.58E-06   |



**Table S8 DREME analysis of Yan bound regions.** Motifs identified by DREME analysis are indicated along with the p-value, e-value and number of sites they were found at. TomTom was used to match enriched motifs to the PWM databases: FlyReg (based on Flyreg Drosophila DNase I Footprint Database v2.0); idmmpmm2009 and dmmpmm2009 {Kulakovskii, 2009 #106;Kulakovskiy, 2009 #110}.

| <b>Top 600 peaks associated with HDRs</b> |                  |                |                |              |
|-------------------------------------------|------------------|----------------|----------------|--------------|
| <b>DREME motif</b>                        | <b>TomTom ID</b> | <b>p-value</b> | <b>E-value</b> | <b>sites</b> |
| GARAGRGA                                  | Trl              | 9.64E-05       | 0.00722792     | 173          |
| DACAACAA                                  | Aef1             | 0.000418125    | 0.0313594      | 164          |
| CTCKCTY                                   | Trl              | 3.72E-05       | 0.00279222     | 229          |
| KGGAAAW                                   | dl               | 0.0012355      | 0.0926621      | 333          |
| CAGGTAG                                   | sna              | 0.000531537    | 0.0398653      | 65           |
| CGRCAGC                                   | Adf1             | 0.000816332    | 0.0612249      | 92           |
| CACTCGM                                   | z                | 0.000766762    | 0.0575072      | 97           |
| CACTCGM                                   | tin              | 0.00120053     | 0.0900398      | 97           |
| TTAATTR                                   | Dfd              | 3.91E-05       | 0.00293183     | 131          |
| TTAATTR                                   | en               | 0.000104947    | 0.007871       | 131          |
| TTAATTR                                   | ara              | 0.000701701    | 0.0526276      | 131          |
| CASTTGAG                                  | tin              | 5.07E-06       | 0.000380059    | 44           |
| CASTTGAG                                  | vnd              | 1.33E-05       | 0.000995676    | 44           |
| <b>TOP 600 Isolated peaks</b>             |                  |                |                |              |
| <b>DREME motif</b>                        | <b>TomTom ID</b> | <b>p-value</b> | <b>E-value</b> | <b>sites</b> |
| CBCTCTCY                                  | Trl              | 1.29E-05       | 0.000965534    | 159          |
| CARCARCA                                  | Aef1             | 1.61E-05       | 0.00120872     | 185          |
| AAHAAYAA                                  | bab1             | 0.000985128    | 0.0738846      | 243          |
| CACTCRCW                                  | z                | 4.80E-05       | 0.00360071     | 112          |
| CACTCRCW                                  | ey               | 0.000539699    | 0.0404774      | 112          |
| CACTCRCW                                  | toy              | 0.00106265     | 0.0796985      | 112          |
| AHATAAA                                   | zen              | 0.000889086    | 0.0666815      | 193          |
| GGCDGCCA                                  | shn              | 0.000443008    | 0.0332256      | 38           |

**Table S9 Yan reporters contain ETS and MAD motifs.** Reporter constructs were generated by inserting putative Yan binding sequences upstream of the luciferase gene coding sequence. Motif analysis was performed using MAST {Bailey, 1998 #24} with a PWM derived from the top 50 Yan-bound sequences and a PWM for Mad from dmmpmm2009 {Kulakovskiy, 2009 #110}.

| Sequence              | Gene           | Classification<br>of Yan binding<br>at Stage 11 | Length | Number<br>of ETS<br>motifs | Number<br>of ETS<br>motifs<br><55bp<br>apart | Number<br>of MAD<br>motifs | Number of<br>ETS and<br>MAD<br>motifs<br><55bp<br>apart |
|-----------------------|----------------|-------------------------------------------------|--------|----------------------------|----------------------------------------------|----------------------------|---------------------------------------------------------|
| 2R:2462316..2463216   | jing           | Dense                                           | 900    | 7                          | 1                                            | 2                          | 6                                                       |
| 3R:19123736..19124725 | pnt            | Dense                                           | 989    | 4                          | 0                                            | 1                          | 2                                                       |
| 3R:4850556..4851466   | neur           | Dense                                           | 910    | 9                          | 5                                            | 3                          | 5                                                       |
| 3L:7149337..7149875   | corn           | Isolated<br>multiple                            | 538    | 4                          | 1                                            | 0                          | 0                                                       |
| 2R:18690149..18691120 | cycB           | Dense                                           | 971    | 3                          | 1                                            | 0                          | 0                                                       |
| X:4002722..4003475    | cib            | Dense                                           | 753    | 5                          | 3                                            | 2                          | 7                                                       |
| 3R:17960179..17960869 | CG42390        | Dense                                           | 690    | 3                          | 0                                            | 0                          | 0                                                       |
| X:2359633..2360418    | trol           | Dense                                           | 785    | 2                          | 0                                            | 2                          | 4                                                       |
| 2R:16988945..16989568 | king-<br>tubby | Isolated single                                 | 623    | 5                          | 2                                            | 1                          | 0                                                       |
| 2L:19575684..19576619 | spi            | Dense                                           | 935    | 4                          | 0                                            | 3                          | 3                                                       |
| 2L:7512763..7513429   | Rapgap1        | Dense                                           | 666    | 7                          | 2                                            | 2                          | 6                                                       |

---

|                       |         |                 |     |   |   |   |   |
|-----------------------|---------|-----------------|-----|---|---|---|---|
| X:11787899..11788506  | wisp    | Isolated single | 607 | 1 | 0 | 0 | 0 |
| 2R:17251401..17252175 | cv-2    | Dense           | 774 | 4 | 1 | 1 | 0 |
| 3L:347377..348056     | mth     | Isolated single | 679 | 8 | 4 | 0 | 0 |
| 3R:7712976..7713933   | CG31368 | Isolated single | 957 | 4 | 0 | 2 | 2 |
| 2L:1007518..1007989   | ia2     | Isolated single | 471 | 2 | 1 | 1 | 2 |
| 3R:22706985..22707726 | ro      | Dense           | 741 | 1 | 0 | 4 | 2 |
| 2L:6956590..6957184   | CG3430  | Isolated single | 594 | 2 | 0 | 2 | 2 |

---

**Table S10 List of primers used for CHIP qPCR**

| Gene    | Forward                   | Reverse                    |
|---------|---------------------------|----------------------------|
| lace    | 5'GAAACGCGAGTTAAACACTT3'  | 5'ATGGAACCAGCTATGGAAC3'    |
| CG3430  | 5'CCAGGTCCAGGTACTTTATG3'  | 5'GGAATCATCTGAAGAGCAAG3'   |
| CG5740  | 5'TGTTGTTGTTCGGTGATTTAG3' | 5'AGAGGGAAATAAGAGGGAGA3'   |
| cv-2    | 5'TTCTTCTTCTTCCTCCTCCT3'  | 5'GGAAGTGTGTGTGTGTGTGT3'   |
| CG31368 | 5'TAGTGCAGCTGAAATCAAGA3'  | 5'TACAAACTCACGCAAACATT3'   |
| eve     | 5'GCAGCAGCATTGTATCTC3'    | 5'GTGAAGCAGCAATTATGTTG3'   |
| argos   | 5'TGAATACGCTGCAGTTTAAG3'  | 5'AACTGACGGAGGAAGTAAATAA3' |
| neur    | 5'CCATTCTAAAGGAAACATCG3'  | 5'TTTCTACTCCACCTTGGTTC3'   |
| jing    | 5'ACTGGGAAATTCATAAGCA3'   | 5'CGTACTCACACTTGCACAAT3'   |
| NC1     | 5'GCATTTATTAAGCCAACAC3'   | 5'GTTAAGCTTAGGTCGTGCTC3'   |
| NC2     | 5'TTCAGCGCACTGTTTAAGTA3'  | 5'CGGTCTCTTTCTGACAGTCT3'   |
